# Supplementary material for: Zwitterions as catalytic electron donor species for visible light-induced photoactivation of oxime esters and direct C3-alkylation of quinoxalin-2(1H)-ones
Source: Royal Society of Chemistry journal article supplement (doi:10.1039/d4qo01390e), 2024-01-01

## SUPPLEMENTARY INFORMATION

---

### Supplementary Information

#### **Zwitterions as catalytic electron donor species for visible light-induced photoactivation of oxime esters and direct C3-alkylation of quinoxalin-2(1*H*)-ones**

Haichen Mao, Yuting Zhang, Hengrong Cao, Junbiao Chang,\* and Bo Zhu\*

E-mail: changjunbiao@zzu.edu.cn; zbtiantang@126.com.

#### **Table of Contents**

|                                                                               |     |
|-------------------------------------------------------------------------------|-----|
| 1. General Information .....                                                  | S2  |
| 2. Reaction Investigation and Condition Optimization .....                    | S2  |
| 2.1 Screening of catalysts .....                                              | S2  |
| 2.2 Screening of Base and Solvent .....                                       | S3  |
| 2.3 Control Experiments .....                                                 | S3  |
| 3. Synthesis Procedures and Characterization of Products .....                | S4  |
| 3.1 Synthesis Procedure and Characterization of Product <b>3</b> .....        | S4  |
| 3.2 Synthesis Procedure and Characterization of Product <b>5</b> .....        | S14 |
| 3.3 Synthesis Procedure and Characterization of Product <b>7</b> .....        | S15 |
| 3.4 Gram Scale Synthesis Procedure of Product <b>3aa</b> and <b>3aj</b> ..... | S16 |
| 3. Mechanisms Study Experiments .....                                         | S17 |
| 4.1 Radical Trap Experiment .....                                             | S17 |
| 4.2 Radical Clock Experiment .....                                            | S18 |
| 4.3 UV-Vis Absorption Spectroscopic Measurements .....                        | S19 |
| 4.4 Job's Plot Experiment .....                                               | S20 |
| 4.5 On-Off-On Experiment .....                                                | S20 |
| References .....                                                              | S21 |
| NMR Spectra .....                                                             | S22 |

## 1. General Information

All reactions involving air- or moisture-sensitive reagents or intermediates were carried out in oven-dried glassware under nitrogen ( $N_2$ ) atmosphere using standard *Schlenk* techniques. All reactions under irradiation were conducted in front of a 20 W white LED (400-800 nm) bulb. All commercially available reagents were purchased and used directly without further purification. Thin layer chromatography (TLC) was performed on silica gel plates and visualized by fluorescence quenching under UV light or staining with the standard solution of Phosphomolybdic acid. Flash chromatography was carried out using silica gel (200-300 mesh) under a light positive pressure, eluting with the specified solvent system. Organic solutions were concentrated under reduced pressure on a rotatory evaporator. Isolated yields refer to materials of >95% purity as determined by  $^1H$  NMR.

$^1H$  NMR spectra were recorded on Bruker Bruker 400 MHz and 600 MHz spectrometers. Chemical shifts are reported in parts per million (ppm) and the spectra are calibrated to the resonance resulting from incomplete deuteration of the solvent ( $CDCl_3$ : 7.26ppm, singlet).  $^{13}C$  NMR spectra were recorded on the same spectrometer with complete proton decoupling. Chemical shifts are reported in ppm with the solvent resonance as the internal standard ( $^{13}CDCl_3$ : 77.16ppm). Data are reported as follows: chemical shift  $\delta$ /ppm, multiplicity (s = singlet, d = doublet, t = triplet, q = quartet, p = pentet, m = multiplet or combinations thereof;  $^{13}C$  signals are singlets unless otherwise stated), coupling constants  $J$  in Hz, and integration ( $^1H$  only).  $^{19}F$  NMR spectra were recorded on the same Spectrometers.

High Resolution Mass Spectrometry (HRMS) were all recorded on an ABI/Sciex QStar Mass Spectrometer using a positive electrospray ionization (ESI+). Measured values are reported to 4 decimal places of the calculated value. The calculated values are based on the most abundant isotope.

The starting materials, including oxime esters<sup>1-3</sup>, quinoxalin-2(1*H*)-ones<sup>4,5</sup>, and heterocycles<sup>6</sup>, were synthesized according to previously reported methods. Zwitterions **Z1**<sup>7,8</sup> and **Z4**<sup>9</sup> were also prepared following established protocols. The photocatalyst fac-Ir(ppy)<sub>3</sub>, 4CzIPN, and zwitterions **Z2** and **Z3** were purchased and used as received, without further purification.

## 2. Reaction Investigation and Condition Optimization

### 2.1 Screening of catalysts

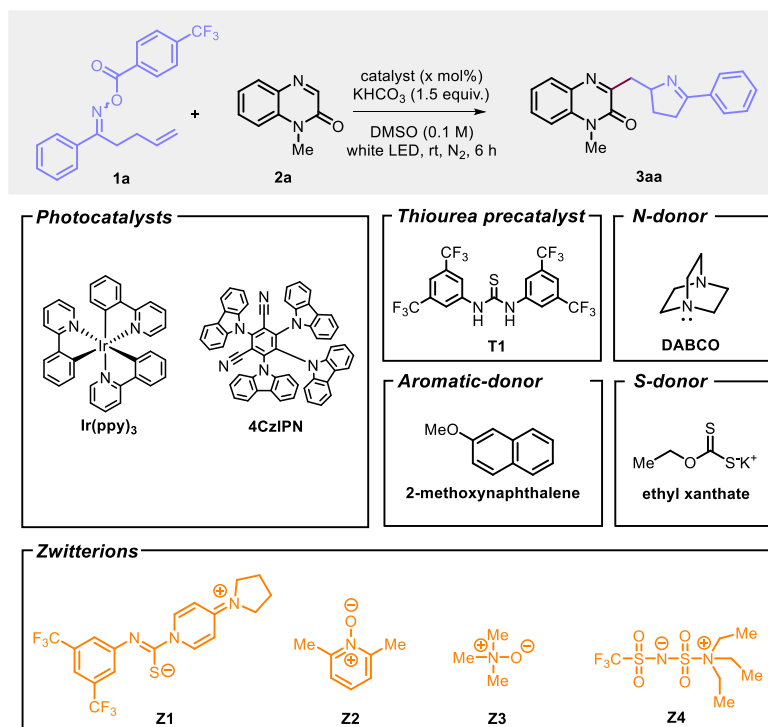

**Table S1.** Screening of photocatalyst <sup>[a]</sup>.

| entry | catalyst | x | yield of <b>3aa</b> (%) <sup>[b]</sup> |
|-------|----------|---|----------------------------------------|
| 1     | none     | - | 8                                      |

## SUPPLEMENTARY INFORMATION

|          |                          |          |           |
|----------|--------------------------|----------|-----------|
| 2        | fac-Ir(ppy) <sub>3</sub> | 2        | 93        |
| 3        | 4CzIPN                   | 2        | 83        |
| 4        | T1                       | 5        | 89        |
| 5        | DABCO                    | 5        | 8         |
| 6        | 2-methoxynaphthalene     | 5        | 29        |
| 7        | potassium ethyl xanthate | 5        | 80        |
| <b>8</b> | <b>Z1</b>                | <b>5</b> | <b>96</b> |
| 9        | Z2                       | 5        | 7         |
| 10       | Z3                       | 5        | 75        |
| 11       | Z4                       | 5        | 51        |
| 12       | Z1                       | 10       | 95        |
| 13       | Z1                       | 2        | 43        |

[a] Reaction conditions: **1a** (0.20 mmol), **2a** (0.30 mmol), photocatalyst (x mmol), KHCO<sub>3</sub> (0.30 mmol), DMSO (2.0 mL), under the irradiation of 20 W white LED for 6 h at room temperature in a sealed tube under N<sub>2</sub> atmosphere. [b] Yield of the isolated product **3aa**.

### 2.2 Screening of Base and Solvent

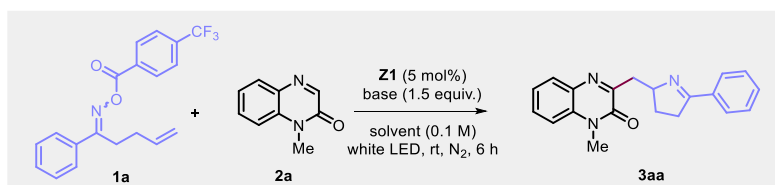

**Table S2.** Screening of base and solvent <sup>[a]</sup>.

| Entry    | base                            | solvent     | Yield of <b>3aa</b> (%) <sup>[b]</sup> |
|----------|---------------------------------|-------------|----------------------------------------|
| 1        | K <sub>2</sub> CO <sub>3</sub>  | DMSO        | 90                                     |
| 2        | Na <sub>2</sub> CO <sub>3</sub> | DMSO        | 88                                     |
| 3        | K <sub>3</sub> PO <sub>4</sub>  | DMSO        | 89                                     |
| <b>4</b> | <b>KHCO<sub>3</sub></b>         | <b>DMSO</b> | <b>96</b>                              |
| 5        | Et <sub>3</sub> N               | DMSO        | 15                                     |
| 6        | DMAP                            | DMSO        | 32                                     |
| 7        | KHCO <sub>3</sub>               | DMF         | 90                                     |
| 8        | KHCO <sub>3</sub>               | DMAc        | 90                                     |
| 9        | KHCO <sub>3</sub>               | MeCN        | 75                                     |
| 10       | KHCO <sub>3</sub>               | THF         | 10                                     |
| 11       | KHCO <sub>3</sub>               | DCM         | NR                                     |

[a] Reaction conditions: **1a** (0.20 mmol), **2a** (0.30 mmol), **Z1** (5 mmol), base (0.30 mmol), solvent (2.0 mL), under the irradiation of 20 W white LED for 6 h at room temperature in a sealed tube under N<sub>2</sub> atmosphere. [b] Yield of the isolated product **3aa**.

### 2.3 Control Experiments

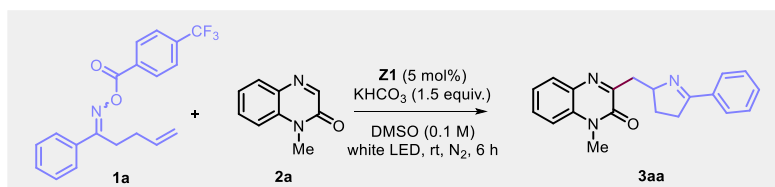

**Table S3.** Control experiments <sup>[a]</sup>.

| Entry | variations                | Yield of <b>3aa</b> (%) <sup>[b]</sup> |
|-------|---------------------------|----------------------------------------|
| 1     | without <b>Z1</b>         | 8                                      |
| 2     | without KHCO <sub>3</sub> | NR                                     |
| 3     | without irradiation       | NR                                     |
| 4     | under air                 | trace                                  |
| 5     | under sunlight            | 90                                     |

[a] Reaction conditions: **1a** (0.20 mmol), **2a** (0.30 mmol), **Z1** (5 mmol), KHCO<sub>3</sub> (0.30 mmol), solvent (2.0 mL), under the irradiation of 20 W white LED for 6 h at room temperature in a sealed tube under N<sub>2</sub> atmosphere. [b] Yield of the isolated product **3aa**.

## 3. Synthesis Procedures and Characterization of Products

## 3.1 Synthesis Procedure and Characterization of Product 3

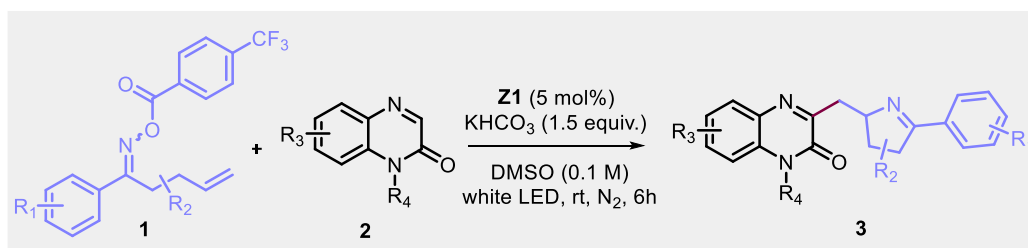

An oven-dried Schlenk tube equipped with a stirring bar was charged with **1** (0.2 mmol, 1.0 equiv.), **2** (0.3 mmol, 1.5 equiv.), **Z1** (0.01 mmol, 4.19 mg, 5 mol%) and KHCO<sub>3</sub> (0.3 mmol, 30.0 mg, 1.5 equiv.). After refilling with N<sub>2</sub> repeated three times, DMSO (2.0 mL) was added through syringe. The mixture was stirred at room temperature for 6 h in front of a 20 W white LED bulb. Water and EtOAc were added and the mixture was stirred for 10 min. The layers were separated and the aqueous layer was extracted with EtOAc. The combined organic layers were then washed with brine, dried over Na<sub>2</sub>SO<sub>4</sub> and concentrated in vacuo. The residue was purified by column chromatography on silica gel to afford the corresponding product.

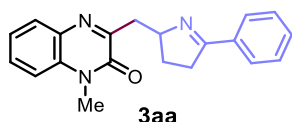

**1-Methyl-3-((5-phenyl-3,4-dihydro-2H-pyrrol-2-yl)methyl)quinoxalin-2(1H)-one (3aa)**: 60.9 mg, 96% yield as a white solid.

**<sup>1</sup>H NMR** (600 MHz, CDCl<sub>3</sub>): δ 7.86 – 7.82 (m, 3H), 7.52 (t, *J* = 7.8 Hz, 1H), 7.41 – 7.36 (m, 3H), 7.33 (t, *J* = 7.8 Hz, 1H), 7.29 (d, *J* = 7.8 Hz, 1H), 4.97 – 4.92 (m, 1H), 3.70 (s, 3H), 3.52 (dd, *J* = 15.0, 6.0 Hz, 1H), 3.10 (dd, *J* = 11.4, 8.4 Hz, 1H), 3.09 – 3.04 (m, 1H), 2.96 – 2.91 (m, 1H), 2.32 (dddd, *J* = 12.7, 9.6, 7.7, 4.9 Hz, 1H), 1.78 (ddt, *J* = 13.3, 9.7, 7.0 Hz, 1H);

**<sup>13</sup>C NMR** (151 MHz, CDCl<sub>3</sub>): δ 172.74, 159.11, 155.16, 134.82, 133.31, 132.93, 130.39, 129.96, 129.78, 128.42, 127.88, 123.58, 113.66, 70.95, 41.13, 35.14, 29.17, 29.00;

**HRMS (ESI) m/z**: calculated for C<sub>20</sub>H<sub>20</sub>N<sub>3</sub>O [M+H]<sup>+</sup>: 318.1601, found: 318.1597.

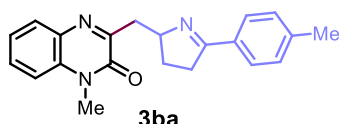

**1-Methyl-3-((5-(*p*-tolyl)-3,4-dihydro-2H-pyrrol-2-yl)methyl)quinoxalin-2(1H)-one (3ba)**: 59.7 mg, 90% yield as a white solid.

**<sup>1</sup>H NMR** (600 MHz, CDCl<sub>3</sub>): δ 7.85 (dd, *J* = 8.0, 1.6 Hz, 1H), 7.74 – 7.68 (m, 2H), 7.52 (ddd, *J* = 8.5, 7.3, 1.5 Hz, 1H), 7.35 – 7.30 (m, 1H), 7.29 (dd, *J* = 8.4, 1.2 Hz, 1H), 7.18 (d, *J* = 7.9 Hz, 2H), 4.92 (tt, *J* = 8.2, 6.2 Hz, 1H), 3.69 (s, 3H), 3.12 – 3.01 (m, 2H), 2.91 (dddd, *J* = 17.0, 9.5, 7.4, 1.8 Hz, 1H), 2.36 (s, 3H), 2.30 (dddd, *J* = 12.8, 9.9, 7.8, 5.0 Hz, 1H), 1.76 (ddt, *J* = 13.2, 10.0, 7.0 Hz, 1H);

**<sup>13</sup>C NMR** (151 MHz, CDCl<sub>3</sub>): δ 172.63, 159.14, 155.13, 140.56, 133.29, 132.91, 132.08, 129.93, 129.74, 129.12, 127.85, 123.55, 113.64, 70.79, 41.14, 35.09, 29.15, 28.94, 21.53;

**HRMS (ESI) m/z**: calculated for C<sub>21</sub>H<sub>22</sub>N<sub>3</sub>O [M+H]<sup>+</sup>: 332.1757, found: 332.1754.

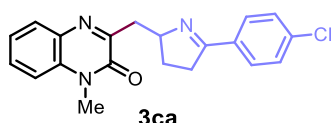

**3-((5-(4-Chlorophenyl)-3,4-dihydro-2H-pyrrol-2-yl)methyl)-1-methylquinoxalin-2(1H)-one (3ca)**: 62.6 mg, 89% yield as a white solid.

**<sup>1</sup>H NMR** (600 MHz, CDCl<sub>3</sub>): δ 7.84 (ddd, *J* = 16.4, 8.0, 1.7 Hz, 3H), 7.55 – 7.49 (m, 1H), 7.39 (dq, *J* = 8.7, 6.7 Hz, 3H), 7.33 (t, *J* = 7.6 Hz, 1H), 7.29 (d, *J* = 8.3 Hz, 1H), 4.94 (tt, *J* = 8.1, 6.3 Hz, 1H), 3.70 (s, 3H), 3.52 (dd, *J* = 14.9, 6.2 Hz, 1H), 3.15 – 3.02 (m, 2H), 2.94 (dddd, *J* = 17.2, 9.7, 7.5, 1.8 Hz, 1H), 2.32 (dddd, *J* = 12.7, 9.6, 7.7, 4.9 Hz, 1H), 1.78 (ddt, *J* = 13.4, 9.8, 7.0 Hz, 1H);

## SUPPLEMENTARY INFORMATION

**<sup>13</sup>C NMR** (151 MHz, CDCl<sub>3</sub>): δ 172.73, 159.10, 155.15, 134.82, 133.31, 132.92, 130.39, 129.96, 129.78, 128.42, 127.87, 123.58, 113.65, 70.95, 41.13, 35.14, 29.16, 29.00;

**HRMS (ESI) m/z**: calculated for C<sub>20</sub>H<sub>19</sub>ClN<sub>3</sub>O [M+H]<sup>+</sup>: 352.1211, found: 352.1210.

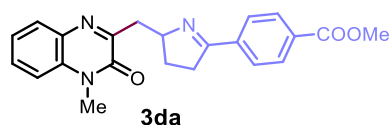

**Methyl 4-(2-((4-methyl-3-oxo-3,4-dihydroquinoxalin-2-yl)methyl)-3,4-dihydro-2H-pyrrol-5-yl)benzoate (3da)**: 69.1 mg, 92% yield as a white solid.

**<sup>1</sup>H NMR** (600 MHz, CDCl<sub>3</sub>): δ 8.04 – 8.02 (m, 2H), 7.8–7.83 (m, 2H), 7.84 (dd, *J* = 8.0, 1.5 Hz, 1H), 7.52 (ddd, *J* = 8.6, 7.2, 1.5 Hz, 1H), 7.36 – 7.31 (m, 1H), 7.29 (dd, *J* = 8.4, 1.2 Hz, 1H), 4.96 (tt, *J* = 8.1, 6.2 Hz, 1H), 3.91 (s, 3H), 3.70 (s, 3H), 3.50 (dd, *J* = 14.9, 6.4 Hz, 1H), 3.17 – 3.02 (m, 2H), 2.95 (dddd, *J* = 17.1, 9.7, 7.4, 1.9 Hz, 1H), 2.35 (dddd, *J* = 12.8, 9.9, 7.8, 5.1 Hz, 1H), 1.79 (ddt, *J* = 13.0, 10.1, 7.1 Hz, 1H);

**<sup>13</sup>C NMR** (151 MHz, CDCl<sub>3</sub>): δ 172.03, 166.80, 158.90, 155.14, 138.80, 133.31, 132.89, 131.57, 129.94, 129.84, 129.68, 127.82, 123.62, 113.67, 71.26, 52.29, 40.98, 35.25, 29.17, 29.03;

**HRMS (ESI) m/z**: calculated for C<sub>22</sub>H<sub>22</sub>N<sub>3</sub>O<sub>3</sub> [M+H]<sup>+</sup>: 376.1656, found: 376.1653.

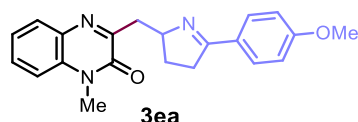

**3-((5-(4-Methoxyphenyl)-3,4-dihydro-2H-pyrrol-2-yl)methyl)-1-methylquinoxalin-2(1H)-one (3ea)**: 63.7 mg, 92% yield as a white solid.

**<sup>1</sup>H NMR** (600 MHz, CDCl<sub>3</sub>): δ 7.84 (dd, *J* = 7.9, 1.5 Hz, 1H), 7.80 – 7.75 (m, 2H), 7.52 (td, *J* = 7.9, 1.5 Hz, 1H), 7.33 (t, *J* = 7.6 Hz, 1H), 7.29 (d, *J* = 8.4 Hz, 1H), 6.88 (d, *J* = 8.6 Hz, 2H), 4.95 – 4.86 (m, 1H), 3.82 (s, 3H), 3.70 (s, 3H), 3.50 (dd, *J* = 14.8, 6.1 Hz, 1H), 3.12 – 2.98 (m, 2H), 2.95 – 2.85 (m, 1H), 2.29 (dddd, *J* = 12.8, 9.7, 7.7, 5.0 Hz, 1H), 1.76 (ddt, *J* = 13.2, 9.9, 7.0 Hz, 1H);

**<sup>13</sup>C NMR** (151 MHz, CDCl<sub>3</sub>): δ 172.07, 161.43, 159.19, 155.16, 133.31, 132.92, 129.95, 129.75, 129.50, 127.62, 123.56, 113.73, 113.64, 70.71, 55.40, 41.22, 35.03, 29.16, 29.02;

**HRMS (ESI) m/z**: calculated for C<sub>21</sub>H<sub>22</sub>N<sub>3</sub>O<sub>2</sub> [M+H]<sup>+</sup>: 348.1707, found: 348.1704.

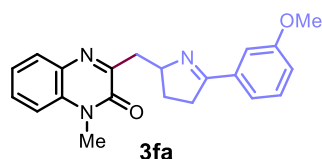

**3-((5-(3-Methoxyphenyl)-3,4-dihydro-2H-pyrrol-2-yl)methyl)-1-methylquinoxalin-2(1H)-one (3fa)**: 65.3 mg, 94% yield as a white solid.

**<sup>1</sup>H NMR** (600 MHz, CDCl<sub>3</sub>): δ 7.85 (dd, *J* = 7.9, 1.5 Hz, 1H), 7.53 (ddd, *J* = 8.6, 7.3, 1.5 Hz, 1H), 7.43 (dd, *J* = 2.6, 1.5 Hz, 1H), 7.34 (tdd, *J* = 8.3, 6.8, 1.3 Hz, 2H), 7.32 – 7.26 (m, 2H), 6.96 (ddd, *J* = 8.1, 2.7, 1.0 Hz, 1H), 5.00 – 4.90 (m, 1H), 3.83 (s, 3H), 3.71 (s, 3H), 3.52 (dd, *J* = 14.9, 6.1 Hz, 1H), 3.14 – 3.01 (m, 2H), 2.93 (dddd, *J* = 17.0, 9.6, 7.4, 1.8 Hz, 1H), 2.32 (dddd, *J* = 12.8, 9.9, 7.8, 5.0 Hz, 1H), 1.78 (dddd, *J* = 12.8, 9.9, 7.3, 6.4 Hz, 1H);

**<sup>13</sup>C NMR** (151 MHz, CDCl<sub>3</sub>): δ 172.73, 159.68, 159.06, 155.15, 136.19, 133.30, 132.92, 129.95, 129.79, 129.40, 123.59, 120.63, 116.90, 113.67, 112.28, 70.89, 55.46, 41.08, 35.26, 29.17, 28.97;

**HRMS (ESI) m/z**: calculated for C<sub>21</sub>H<sub>22</sub>N<sub>3</sub>O<sub>2</sub> [M+H]<sup>+</sup>: 348.1707, found: 348.1706.

## SUPPLEMENTARY INFORMATION

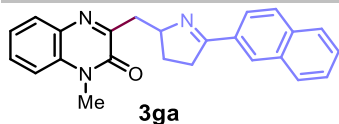

**1-Methyl-3-((5-(naphthalen-2-yl)-3,4-dihydro-2H-pyrrol-2-yl)methyl)quinoxalin-2(1H)-one (3ga):** 67.6 mg, 92% yield as a white solid.

**<sup>1</sup>H NMR** (600 MHz, CDCl<sub>3</sub>): δ 8.16 (d, *J* = 1.7 Hz, 1H), 8.08 (dd, *J* = 8.6, 1.7 Hz, 1H), 7.90 – 7.85 (m, 2H), 7.83 (dd, *J* = 7.8, 2.7 Hz, 2H), 7.55 – 7.45 (m, 3H), 7.37 – 7.32 (m, 1H), 7.29 (dd, *J* = 8.4, 1.2 Hz, 1H), 5.00 (dtdd, *J* = 8.2, 6.3, 3.8, 2.0 Hz, 1H), 3.70 (s, 3H), 3.57 (dd, *J* = 14.9, 6.2 Hz, 1H), 3.25 – 3.12 (m, 2H), 3.06 (dddd, *J* = 16.8, 9.6, 7.5, 1.8 Hz, 1H), 2.38 (dddd, *J* = 12.7, 9.9, 7.7, 4.9 Hz, 1H), 1.84 (dddd, *J* = 12.7, 9.9, 7.4, 6.4 Hz, 1H);

**<sup>13</sup>C NMR** (151 MHz, CDCl<sub>3</sub>): δ 172.77, 159.09, 155.17, 134.47, 133.32, 133.06, 132.93, 132.30, 129.97, 129.80, 128.81, 128.34, 128.11, 127.83, 127.07, 126.39, 124.92, 123.60, 113.67, 71.04, 41.17, 35.16, 29.17, 29.07;

**HRMS (ESI) m/z:** calculated for C<sub>24</sub>H<sub>22</sub>N<sub>3</sub>O [M+H]<sup>+</sup>: 368.1757, found: 368.1754.

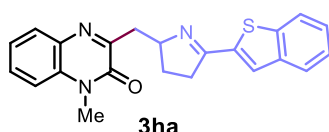

**3-((5-(Benzo[b]thiophen-2-yl)-3,4-dihydro-2H-pyrrol-2-yl)methyl)-1-methylquinoxalin-2(1H)-one (3ha):** 60.7 mg, 81% yield as a light yellow solid.

**<sup>1</sup>H NMR** (600 MHz, CDCl<sub>3</sub>): δ 7.85 (dd, *J* = 7.9, 1.5 Hz, 1H), 7.83 – 7.79 (m, 1H), 7.79 – 7.75 (m, 1H), 7.57 – 7.49 (m, 2H), 7.40 – 7.32 (m, 3H), 7.29 (dd, *J* = 8.4, 1.2 Hz, 1H), 5.04 – 4.93 (m, 1H), 3.70 (s, 3H), 3.57 (dd, *J* = 15.2, 5.8 Hz, 1H), 3.19 – 3.07 (m, 2H), 3.01 (dddd, *J* = 16.8, 9.8, 7.2, 1.7 Hz, 1H), 2.37 (dddd, *J* = 12.8, 9.9, 7.7, 5.1 Hz, 1H), 1.84 (dddd, *J* = 13.2, 10.0, 7.2, 6.2 Hz, 1H);

**<sup>13</sup>C NMR** (151 MHz, CDCl<sub>3</sub>): δ 167.94, 158.84, 155.13, 141.20, 139.81, 139.67, 133.30, 132.90, 129.98, 129.83, 126.42, 125.89, 124.54, 124.51, 123.61, 122.71, 113.68, 71.07, 40.79, 35.59, 29.29, 29.19;

**HRMS (ESI) m/z:** calculated for C<sub>22</sub>H<sub>20</sub>N<sub>3</sub>OS [M+H]<sup>+</sup>: 374.1322, found: 374.1314.

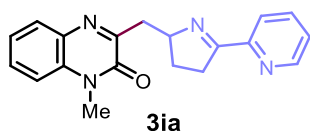

**1-Methyl-3-((5-(pyridin-2-yl)-3,4-dihydro-2H-pyrrol-2-yl)methyl)quinoxalin-2(1H)-one (3ia):** 33.7 mg, 53% yield as a yellow solid.

**<sup>1</sup>H NMR** (600 MHz, CDCl<sub>3</sub>): δ 8.65 (d, *J* = 4.7 Hz, 1H), 8.06 (d, *J* = 7.3 Hz, 1H), 7.93 (s, 1H), 7.75 (s, 1H), 7.53 (ddd, *J* = 8.6, 7.2, 1.6 Hz, 1H), 7.41 – 7.27 (m, 3H), 5.01 (p, *J* = 7.5 Hz, 1H), 3.71 (s, 3H), 3.49 (dd, *J* = 15.7, 6.7 Hz, 1H), 3.31 – 3.02 (m, 3H), 2.39 (s, 1H), 1.83 (s, 1H);

**<sup>13</sup>C NMR** (151 MHz, CDCl<sub>3</sub>): δ 174.76, 158.72, 155.14, 149.26, 136.69, 133.30, 132.87, 130.15, 129.94, 123.70, 122.75, 113.67, 70.85, 40.73, 34.80, 29.24, 29.00 (*one aromatic carbon signal is not observed due to signal weakness*);

**HRMS (ESI) m/z:** calculated for C<sub>19</sub>H<sub>18</sub>N<sub>4</sub>NaO [M+Na]<sup>+</sup>: 341.1373, found: 341.1369.

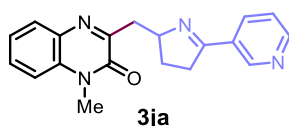

**1-Methyl-3-((5-(pyridin-3-yl)-3,4-dihydro-2H-pyrrol-2-yl)methyl)quinoxalin-2(1H)-one (3ja):** 46.9 mg, 74% yield as a yellow solid.

**<sup>1</sup>H NMR** (600 MHz, CDCl<sub>3</sub>): δ 8.95 (s, 1H), 8.62 (d, *J* = 4.7 Hz, 1H), 8.15 (dt, *J* = 8.0, 2.0 Hz, 1H), 7.83 (dd, *J* = 8.0, 1.5 Hz, 1H), 7.52 (ddd, *J* = 8.6, 7.2, 1.5 Hz, 1H), 7.35 – 7.27 (m, 3H), 4.94 (tt, *J* = 8.1, 6.4 Hz, 1H), 3.69 (s, 3H), 3.47 (dd, *J* = 14.9, 6.6 Hz, 1H), 3.16 – 3.01 (m, 2H), 2.94 (dddd, *J* = 17.1, 9.6, 7.4, 1.9 Hz, 1H), 2.35 (dddd, *J* = 12.8, 9.9, 7.8, 4.9 Hz, 1H), 1.80 (ddt, *J* = 13.3, 10.0, 7.0 Hz, 1H);

**<sup>13</sup>C NMR** (151 MHz, CDCl<sub>3</sub>): δ 170.48, 158.82, 155.12, 151.26, 149.25, 135.04, 133.28, 132.85, 130.40, 129.92, 129.87, 123.64, 123.46, 113.68, 71.13, 40.96, 35.01, 29.18, 28.89;

**HRMS (ESI) m/z:** calculated for C<sub>19</sub>H<sub>18</sub>N<sub>4</sub>NaO [M+Na]<sup>+</sup>: 341.1373, found: 341.1366.

## SUPPLEMENTARY INFORMATION

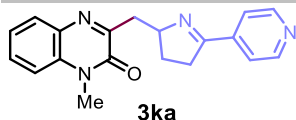

**1-Methyl-3-((5-(pyridin-4-yl)-3,4-dihydro-2H-pyrrol-2-yl)methyl)quinoxalin-2(1H)-one (3ka):** 52.6 mg, 83% yield as a light yellow solid.

**<sup>1</sup>H NMR** (600 MHz, CDCl<sub>3</sub>): δ 8.65 (d, *J* = 5.1 Hz, 2H), 7.83 (dd, *J* = 7.9, 1.5 Hz, 1H), 7.67 – 7.61 (m, 2H), 7.52 (ddd, *J* = 8.6, 7.3, 1.5 Hz, 1H), 7.36 – 7.27 (m, 2H), 4.97 (qdd, *J* = 8.6, 6.6, 2.2 Hz, 1H), 3.70 (s, 3H), 3.48 (dd, *J* = 15.0, 6.5 Hz, 1H), 3.10 (dd, *J* = 14.9, 8.2 Hz, 1H), 3.04 (dddd, *J* = 17.2, 10.1, 4.9, 2.4 Hz, 1H), 2.91 (dddd, *J* = 17.2, 9.7, 7.5, 2.0 Hz, 1H), 2.36 (dddd, *J* = 12.8, 9.9, 7.8, 4.8 Hz, 1H), 1.80 (ddt, *J* = 13.0, 10.1, 7.1 Hz, 1H);

**<sup>13</sup>C NMR** (151 MHz, CDCl<sub>3</sub>): δ 171.29, 158.68, 155.11, 150.28, 141.62, 133.29, 132.85, 129.93, 123.67, 121.87, 113.70, 71.45, 40.81, 34.96, 29.19, 28.89;

**HRMS (ESI) *m/z***: calculated for C<sub>19</sub>H<sub>18</sub>N<sub>4</sub>NaO [M+Na]<sup>+</sup>: 341.1373, found: 341.1370.

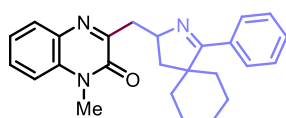

**1-Methyl-3-(((1-phenyl-2-azaspiro[4.5]dec-1-en-3-yl)methyl)quinoxalin-2(1H)-one (3la):** 74.4 mg, 96% yield as a white solid.

**<sup>1</sup>H NMR** (600 MHz, CDCl<sub>3</sub>): δ 7.86 (dd, *J* = 7.9, 1.5 Hz, 1H), 7.56 – 7.48 (m, 3H), 7.36 – 7.30 (m, 4H), 7.28 (dd, *J* = 8.4, 1.2 Hz, 1H), 4.85 – 4.74 (m, 1H), 3.69 (s, 3H), 3.56 (dd, *J* = 14.7, 6.8 Hz, 1H), 3.11 (dd, *J* = 14.8, 8.1 Hz, 1H), 2.45 (dd, *J* = 12.8, 7.2 Hz, 1H), 1.77 (td, *J* = 13.1, 3.7 Hz, 1H), 1.73 – 1.59 (m, 5H), 1.59 – 1.49 (m, 2H), 1.43 (qt, *J* = 13.9, 4.9 Hz, 1H), 1.29 (tt, *J* = 13.1, 3.6 Hz, 1H), 1.14 (qt, *J* = 13.9, 3.8 Hz, 1H);

**<sup>13</sup>C NMR** (151 MHz, CDCl<sub>3</sub>): δ 180.62, 159.18, 155.16, 136.07, 133.30, 132.93, 129.94, 129.76, 128.88, 128.24, 128.03, 123.54, 113.62, 66.83, 56.62, 41.87, 41.33, 35.78, 32.17, 29.15, 25.68, 23.47, 23.23;

**HRMS (ESI) *m/z***: calculated for C<sub>25</sub>H<sub>28</sub>N<sub>3</sub>O [M+H]<sup>+</sup>: 386.2227, found: 386.2224.

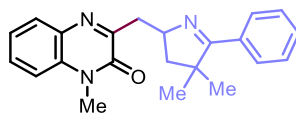

**3-((4,4-Dimethyl-5-phenyl-3,4-dihydro-2H-pyrrol-2-yl)methyl)-1-methylquinoxalin-2(1H)-one (3ma):** 65.2 mg, 94% yield as a white solid.

**<sup>1</sup>H NMR** (600 MHz, CDCl<sub>3</sub>): δ 7.86 (dd, *J* = 8.0, 1.5 Hz, 1H), 7.71 – 7.65 (m, 2H), 7.51 (ddd, *J* = 8.5, 7.3, 1.5 Hz, 1H), 7.38 – 7.30 (m, 4H), 7.28 (dd, *J* = 8.4, 1.2 Hz, 1H), 4.77 (tt, *J* = 8.4, 6.8 Hz, 1H), 3.70 (s, 3H), 3.56 (dd, *J* = 14.7, 6.8 Hz, 1H), 3.11 (dd, *J* = 14.7, 8.0 Hz, 1H), 2.20 (dd, *J* = 12.6, 6.7 Hz, 1H), 1.72 (dd, *J* = 12.5, 8.7 Hz, 1H), 1.37 (s, 3H), 1.34 (s, 3H);

**<sup>13</sup>C NMR** (151 MHz, CDCl<sub>3</sub>): δ 179.80, 159.19, 155.17, 135.03, 133.30, 132.91, 129.92, 129.78, 129.42, 128.19, 128.07, 123.57, 113.63, 66.09, 50.62, 48.42, 41.50, 29.17, 27.34, 26.21;

**HRMS (ESI) *m/z***: calculated for C<sub>22</sub>H<sub>24</sub>N<sub>3</sub>O [M+H]<sup>+</sup>: 346.1914, found: 346.1913.

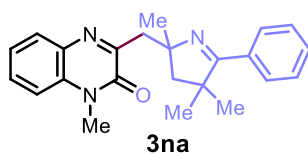

**1-Methyl-3-((2,4,4-trimethyl-5-phenyl-3,4-dihydro-2H-pyrrol-2-yl)methyl)quinoxalin-2(1H)-one (3na):** 59.2 mg, 82% yield as a white solid.

**<sup>1</sup>H NMR** (600 MHz, CDCl<sub>3</sub>): δ 7.83 (dd, *J* = 7.9, 1.5 Hz, 1H), 7.64 (dd, *J* = 7.5, 2.2 Hz, 2H), 7.50 (ddd, *J* = 8.5, 7.2, 1.5 Hz, 1H), 7.36 – 7.28 (m, 4H), 7.28 – 7.24 (m, 1H), 3.69 (s, 3H), 3.54 (d, *J* = 14.0 Hz, 1H), 3.18 (d, *J* = 13.9 Hz, 1H), 2.40 (d, *J* = 13.2 Hz, 1H), 1.89 (d, *J* = 13.2 Hz, 1H), 1.54 (s, 3H), 1.43 (s, 3H), 1.27 (s, 3H);

## SUPPLEMENTARY INFORMATION

**<sup>13</sup>C NMR** (151 MHz, CDCl<sub>3</sub>): δ 177.34, 158.92, 155.53, 135.49, 133.26, 132.72, 129.96, 129.79, 129.10, 128.24, 128.11, 123.49, 113.60, 72.81, 51.98, 51.81, 44.85, 29.35, 29.30, 28.19 (one alkyl carbon signal is overlapped);

**HRMS (ESI) m/z**: calculated for C<sub>23</sub>H<sub>26</sub>N<sub>3</sub>O [M+H]<sup>+</sup>: 360.2070, found: 360.2067.

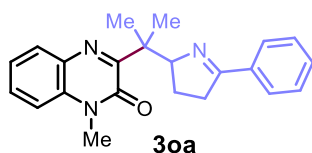

**1-methyl-3-(2-(5-phenyl-3,4-dihydro-2H-pyrrol-2-yl)propan-2-yl)quinoxalin-2(1H)-one (3oa)**: 44.8 mg, 65% yield as a white solid.

**<sup>1</sup>H NMR** (600 MHz, CDCl<sub>3</sub>): δ 7.85 (dd, *J* = 7.9, 1.5 Hz, 1H), 7.83 – 7.79 (m, 2H), 7.52 (ddd, *J* = 8.6, 7.2, 1.6 Hz, 1H), 7.41 – 7.35 (m, 3H), 7.33 (td, *J* = 7.6, 1.2 Hz, 1H), 7.29 (dd, *J* = 8.3, 1.2 Hz, 1H), 5.53 (ddt, *J* = 9.3, 7.5, 2.3 Hz, 1H), 3.70 (s, 3H), 2.92 (td, *J* = 8.1, 7.5, 2.2 Hz, 2H), 2.06 – 1.96 (m, 1H), 1.72 – 1.67 (m, 1H), 1.65 (s, 3H), 1.35 (s, 3H);

**<sup>13</sup>C NMR** (151 MHz, CDCl<sub>3</sub>): δ 171.86, 163.94, 154.18, 135.16, 133.45, 132.42, 130.39, 130.16, 129.73, 128.40, 127.83, 123.32, 113.43, 47.60, 35.76, 29.01, 24.50, 23.30, 20.93;

**HRMS (ESI) m/z**: calculated for C<sub>22</sub>H<sub>24</sub>N<sub>3</sub>O [M+H]<sup>+</sup>: 346.1914, found: 346.1911.

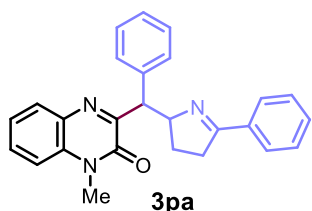

**1-Methyl-3-(phenyl(5-phenyl-3,4-dihydro-2H-pyrrol-2-yl)methyl)quinoxalin-2(1H)-one (3pa)**: 59.8 mg, d.r. = 5:1, 76% yield as a white solid.

**<sup>1</sup>H NMR** (600 MHz, CDCl<sub>3</sub>): (**major**) δ 7.97 (dd, *J* = 7.9, 1.5 Hz, 1H), 7.76 – 7.71 (m, 2H), 7.61 – 7.56 (m, 2H), 7.50 (ddd, *J* = 8.6, 7.3, 1.6 Hz, 1H), 7.38 – 7.24 (m, 7H), 7.23 – 7.19 (m, 1H), 5.52 – 5.42 (m, 1H), 4.80 (d, *J* = 10.3 Hz, 1H), 3.65 (s, 3H), 2.87 (ddd, *J* = 9.2, 6.8, 2.0 Hz, 2H), 2.12 – 2.03 (m, 1H), 1.71 (dtd, *J* = 13.1, 8.8, 7.0 Hz, 1H); (**minor**) δ 7.96 (dd, *J* = 8.0, 1.5 Hz, 1H), 7.79 – 7.73 (m, 2H), 7.62 – 7.56 (m, 2H), 7.54 (ddd, *J* = 8.6, 7.3, 1.5 Hz, 1H), 7.40 – 7.26 (m, 7H), 7.24 – 7.20 (m, 1H), 5.33 (dddt, *J* = 10.1, 8.5, 6.7, 2.1 Hz, 1H), 4.75 (d, *J* = 10.3 Hz, 1H), 3.64 (s, 3H), 3.04 – 2.91 (m, 2H), 2.39 (dddd, *J* = 13.0, 9.5, 7.7, 5.3 Hz, 1H), 1.68 (dddd, *J* = 13.0, 9.8, 7.7, 6.5 Hz, 2H);

**<sup>13</sup>C NMR** (151 MHz, CDCl<sub>3</sub>): (**major**) δ 173.22, 161.11, 154.85, 139.35, 134.98, 133.23, 133.10, 130.41, 130.25, 129.71, 129.54, 128.44, 128.28, 127.91, 127.00, 123.39, 113.57, 75.99, 53.42, 34.99, 29.29, 27.77; (**minor**) δ 172.90, 160.34, 154.68, 140.22, 134.96, 133.16, 132.84, 130.39, 130.33, 130.04, 129.54, 128.36, 128.31, 127.95, 126.80, 123.64, 113.69, 54.51, 35.12, 29.32, 28.62;

**HRMS (ESI) m/z**: calculated for C<sub>26</sub>H<sub>24</sub>N<sub>3</sub>O [M+H]<sup>+</sup>: 394.1914, found: 394.1910.

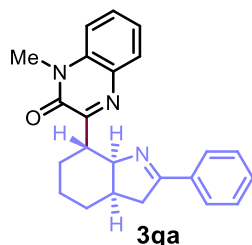

**1-Methyl-3-(2-phenyl-3a,4,5,6,7,7a-hexahydro-3H-indol-7-yl)quinoxalin-2(1H)-one (3qa)**: 47.1 mg, 66% yield as a white solid.

**<sup>1</sup>H NMR** (600 MHz, CDCl<sub>3</sub>): δ 7.90 (dd, *J* = 8.0, 1.6 Hz, 1H), 7.81 – 7.74 (m, 2H), 7.51 (ddd, *J* = 8.6, 7.2, 1.6 Hz, 1H), 7.40 – 7.30 (m, 4H), 7.28 (dd, *J* = 8.3, 1.2 Hz, 1H), 4.84 (dd, *J* = 8.9, 6.9 Hz, 1H), 3.67 (s, 3H), 3.46 (td, *J* = 9.5, 4.0 Hz, 1H), 3.01 (dd, *J* = 15.8, 7.8 Hz, 1H), 2.88 – 2.73 (m, 2H), 1.90 (dt, *J* = 8.8, 5.1 Hz, 1H), 1.83 – 1.71 (m, 2H), 1.68 – 1.52 (m, 3H);

**<sup>13</sup>C NMR** (151 MHz, CDCl<sub>3</sub>): δ 173.62, 162.91, 154.77, 135.36, 133.18, 133.03, 130.28, 130.08, 129.63, 128.35, 127.75, 123.43, 113.57, 72.32, 42.92, 39.58, 37.05, 29.24, 28.31, 26.26, 20.73;

**HRMS (ESI) m/z**: calculated for C<sub>23</sub>H<sub>24</sub>N<sub>3</sub>O [M+H]<sup>+</sup>: 358.1914, found: 358.1911.



## SUPPLEMENTARY INFORMATION

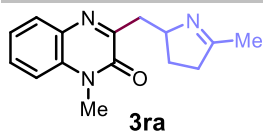

**1-methyl-3-((5-methyl-3,4-dihydro-2H-pyrrol-2-yl)methyl)quinoxalin-2(1H)-one (3ra):** 35.7 mg, 70% yield as a yellow solid.

**<sup>1</sup>H NMR** (600 MHz, CDCl<sub>3</sub>): δ 7.86 – 7.80 (m, 1H), 7.50 (ddd, *J* = 8.6, 7.3, 1.5 Hz, 1H), 7.34 – 7.28 (m, 1H), 7.28 – 7.26 (m, 1H), 4.79 – 4.62 (m, 1H), 3.68 (s, 3H), 3.30 (dd, *J* = 14.9, 7.3 Hz, 1H), 3.04 (dd, *J* = 14.9, 7.4 Hz, 1H), 2.60 (dddd, *J* = 17.2, 10.2, 5.0, 2.0 Hz, 1H), 2.49 (dt, *J* = 17.5, 8.8 Hz, 1H), 2.18 (dddd, *J* = 12.9, 9.9, 7.8, 4.9 Hz, 1H), 2.04 (d, *J* = 1.8 Hz, 3H), 1.62 (ddt, *J* = 13.2, 10.1, 7.1 Hz, 1H);

**<sup>13</sup>C NMR** (151 MHz, CDCl<sub>3</sub>): δ 158.87, 155.10, 133.26, 132.74, 129.90, 129.85, 123.58, 113.61, 69.89, 53.53, 40.83, 38.97, 29.15, 29.09, 19.78;

**HRMS (ESI) *m/z*:** calculated for C<sub>15</sub>H<sub>18</sub>N<sub>3</sub>O [M+H]<sup>+</sup>: 256.1444, found: 256.1441.

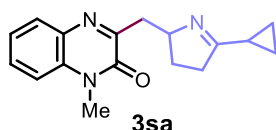

**3-((5-cyclopropyl-3,4-dihydro-2H-pyrrol-2-yl)methyl)-1-methylquinoxalin-2(1H)-one (3sa):** 47.5 mg, 84% yield as a yellow solid.

**<sup>1</sup>H NMR** (600 MHz, CDCl<sub>3</sub>): δ 7.82 (dd, *J* = 8.0, 1.5 Hz, 1H), 7.50 (ddd, *J* = 8.7, 7.3, 1.6 Hz, 1H), 7.33 – 7.28 (m, 1H), 7.28 – 7.26 (m, 1H), 4.66 (tt, *J* = 8.0, 6.4 Hz, 1H), 3.67 (s, 3H), 3.33 (dd, *J* = 14.9, 6.6 Hz, 1H), 2.97 (dd, *J* = 14.9, 8.0 Hz, 1H), 2.39 (dddd, *J* = 16.8, 9.8, 5.0, 1.9 Hz, 1H), 2.28 (dddd, *J* = 17.0, 9.3, 7.5, 1.6 Hz, 1H), 2.11 (dddd, *J* = 12.8, 9.7, 7.6, 5.0 Hz, 1H), 1.85 – 1.75 (m, 1H), 1.56 (ddt, *J* = 13.2, 9.8, 7.0 Hz, 1H), 0.87 – 0.73 (m, 4H);

**<sup>13</sup>C NMR** (151 MHz, CDCl<sub>3</sub>): δ 179.16, 159.17, 155.13, 133.28, 132.90, 129.94, 129.73, 123.54, 113.60, 69.91, 41.03, 34.02, 29.14, 28.63, 14.60, 7.22, 7.01;

**HRMS (ESI) *m/z*:** calculated for C<sub>17</sub>H<sub>20</sub>N<sub>3</sub>O [M+H]<sup>+</sup>: 282.1601, found: 282.1598.

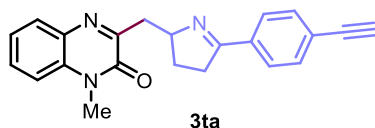

**3-((5-(4-ethynylphenyl)-3,4-dihydro-2H-pyrrol-2-yl)methyl)-1-methylquinoxalin-2(1H)-one (3ta):** 55.2 mg, 81% yield as a white solid after 24 h irradiation.

**<sup>1</sup>H NMR** (600 MHz, CDCl<sub>3</sub>): δ 7.84 (dd, *J* = 8.0, 1.6 Hz, 1H), 7.79 – 7.74 (m, 2H), 7.52 (ddd, *J* = 8.6, 7.2, 1.5 Hz, 1H), 7.50 – 7.46 (m, 2H), 7.35 – 7.31 (m, 1H), 7.29 (dd, *J* = 8.4, 1.2 Hz, 1H), 4.94 (tddd, *J* = 8.3, 6.3, 4.2, 2.0 Hz, 1H), 3.70 (s, 3H), 3.49 (dd, *J* = 14.9, 6.3 Hz, 1H), 3.16 (s, 1H), 3.13 – 2.99 (m, 2H), 2.91 (dddd, *J* = 17.1, 9.7, 7.5, 1.9 Hz, 1H), 2.33 (dddd, *J* = 12.8, 9.9, 7.8, 4.8 Hz, 1H), 1.84 – 1.72 (m, 1H);

**<sup>13</sup>C NMR** (151 MHz, CDCl<sub>3</sub>): δ 172.03, 158.97, 155.14, 134.99, 133.31, 132.90, 132.18, 129.95, 129.84, 127.78, 124.01, 123.62, 113.68, 83.47, 78.89, 71.09, 41.05, 35.10, 29.19, 29.01;

**HRMS (ESI) *m/z*:** calculated for C<sub>22</sub>H<sub>20</sub>N<sub>3</sub>O [M+H]<sup>+</sup>: 342.1601, found: 342.1598.

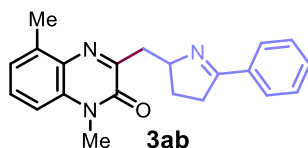

**1,5-Dimethyl-3-((5-phenyl-3,4-dihydro-2H-pyrrol-2-yl)methyl)quinoxalin-2(1H)-one (3ab):** 54.5 mg, 82% yield as a white solid.

**<sup>1</sup>H NMR** (600 MHz, CDCl<sub>3</sub>): δ 7.89 – 7.80 (m, 2H), 7.40 (qd, *J* = 5.7, 3.1 Hz, 4H), 7.19 (d, *J* = 7.4 Hz, 1H), 7.13 (d, *J* = 8.4 Hz, 1H), 4.96 (dtd, *J* = 9.4, 7.1, 4.8 Hz, 1H), 3.69 (s, 3H), 3.62 (dd, *J* = 16.0, 4.9 Hz, 1H), 3.13 – 3.03 (m, 2H), 2.95 (dddd, *J* = 17.1, 9.5, 7.3, 1.8 Hz, 1H), 2.68 (s, 3H), 2.38 (dddd, *J* = 12.9, 9.9, 7.7, 5.0 Hz, 1H), 1.79 (ddt, *J* = 13.3, 10.0, 7.0 Hz, 1H);

**<sup>13</sup>C NMR** (151 MHz, CDCl<sub>3</sub>): δ 172.66, 157.00, 155.06, 138.66, 134.84, 133.26, 131.38, 130.40, 129.48, 128.46, 127.84, 124.88, 111.58, 71.05, 40.67, 35.14, 29.29, 29.00, 17.69;

## SUPPLEMENTARY INFORMATION

**HRMS (ESI) m/z:** calculated for  $C_{21}H_{22}N_3O$   $[M+H]^+$ : 332.1757, found: 332.1754.

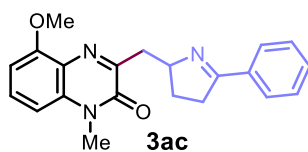

**5-Methoxy-1-methyl-3-((5-phenyl-3,4-dihydro-2H-pyrrol-2-yl)methyl)quinoxalin-2(1H)-one (3ac):** 63.3 mg, 91% yield as a white solid.

**$^1H$  NMR** (600 MHz,  $CDCl_3$ ):  $\delta$  7.83 – 7.81 (m, 2H), 7.45 (dd,  $J$  = 8.1, 1.4 Hz, 1H), 7.41 – 7.34 (m, 3H), 7.21 (t,  $J$  = 8.1 Hz, 1H), 7.01 (dd,  $J$  = 8.2, 1.4 Hz, 1H), 4.96 – 4.87 (m, 1H), 3.97 (s, 3H), 3.90 (s, 3H), 3.51 (dd,  $J$  = 14.9, 6.0 Hz, 1H), 3.11 – 3.01 (m, 2H), 2.92 (dddd,  $J$  = 17.1, 9.5, 7.4, 1.8 Hz, 1H), 2.30 (dddd,  $J$  = 12.7, 9.8, 7.7, 4.9 Hz, 1H), 1.76 (dddd,  $J$  = 12.9, 10.0, 7.4, 6.5 Hz, 1H);

**$^{13}C$  NMR** (151 MHz,  $CDCl_3$ ):  $\delta$  172.67, 158.85, 156.28, 148.20, 134.81, 134.79, 130.35, 128.39, 127.85, 124.27, 123.43, 122.92, 112.62, 70.90, 56.74, 40.98, 35.11, 34.77, 28.94;

**HRMS (ESI) m/z:** calculated for  $C_{21}H_{22}N_3O_2$   $[M+H]^+$ : 348.1707, found: 348.1704.

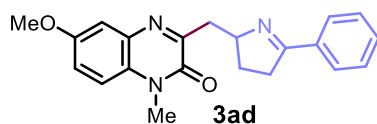

**6-Methoxy-1-methyl-3-((5-phenyl-3,4-dihydro-2H-pyrrol-2-yl)methyl)quinoxalin-2(1H)-one (3ad):** 65.4 mg, 94% yield as a white solid.

**$^1H$  NMR** (600 MHz,  $CDCl_3$ ):  $\delta$  7.84 – 7.77 (m, 2H), 7.41 – 7.33 (m, 3H), 7.32 (d,  $J$  = 2.9 Hz, 1H), 7.19 (d,  $J$  = 9.1 Hz, 1H), 7.13 (dd,  $J$  = 9.1, 2.9 Hz, 1H), 4.99 – 4.86 (m, 1H), 3.86 (s, 3H), 3.67 (s, 3H), 3.49 (dd,  $J$  = 14.8, 6.3 Hz, 1H), 3.14 – 3.00 (m, 2H), 2.92 (dddd,  $J$  = 17.1, 9.5, 7.4, 1.8 Hz, 1H), 2.31 (dddd,  $J$  = 12.7, 9.8, 7.7, 4.9 Hz, 1H), 1.77 (dddd,  $J$  = 12.8, 9.9, 7.4, 6.4 Hz, 1H);

**$^{13}C$  NMR** (151 MHz,  $CDCl_3$ ):  $\delta$  172.69, 159.61, 155.96, 154.77, 134.77, 133.59, 130.35, 128.38, 127.84, 127.50, 118.80, 114.53, 111.46, 70.90, 55.82, 41.23, 35.08, 29.25, 28.98;

**HRMS (ESI) m/z:** calculated for  $C_{21}H_{22}N_3O_2$   $[M+H]^+$ : 348.1707, found: 348.1702.

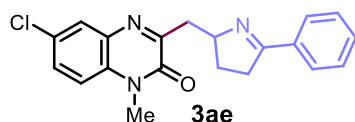

**6-Chloro-1-methyl-3-((5-phenyl-3,4-dihydro-2H-pyrrol-2-yl)methyl)quinoxalin-2(1H)-one (3ae):** 66.0 mg, 94% yield as a white solid.

**$^1H$  NMR** (600 MHz,  $CDCl_3$ ):  $\delta$  7.86 (d,  $J$  = 2.4 Hz, 1H), 7.84 – 7.80 (m, 2H), 7.49 (dd,  $J$  = 8.9, 2.4 Hz, 1H), 7.43 – 7.36 (m, 3H), 7.23 (d,  $J$  = 8.9 Hz, 1H), 4.92 (qdd,  $J$  = 8.1, 6.2, 1.9 Hz, 1H), 3.69 (s, 3H), 3.49 (dd,  $J$  = 15.1, 6.3 Hz, 1H), 3.15 – 3.03 (m, 2H), 2.95 (dddd,  $J$  = 17.1, 9.6, 7.5, 1.8 Hz, 1H), 2.34 (dddd,  $J$  = 12.7, 9.8, 7.8, 4.9 Hz, 1H), 1.81 – 1.71 (m, 1H);

**$^{13}C$  NMR** (151 MHz,  $CDCl_3$ ):  $\delta$  172.87, 160.60, 154.78, 134.71, 133.40, 132.00, 130.46, 129.71, 129.29, 128.85, 128.44, 127.85, 114.80, 70.76, 41.16, 35.13, 29.34, 29.05;

**HRMS (ESI) m/z:** calculated for  $C_{20}H_{19}ClN_3O$   $[M+H]^+$ : 352.1211, found: 352.1202.

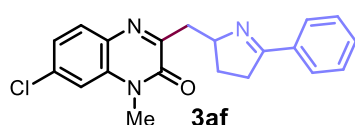

**7-Chloro-1-methyl-3-((5-phenyl-3,4-dihydro-2H-pyrrol-2-yl)methyl)quinoxalin-2(1H)-one (3af):** 64.5 mg, 92% yield as a white solid.

**$^1H$  NMR** (600 MHz,  $CDCl_3$ ):  $\delta$  7.84 – 7.79 (m, 2H), 7.76 (d,  $J$  = 9.1 Hz, 1H), 7.43 – 7.34 (m, 3H), 7.28 (dq,  $J$  = 3.7, 2.1 Hz, 2H), 4.91 (tt,  $J$  = 8.0, 6.3 Hz, 1H), 3.66 (s, 3H), 3.46 (dd,  $J$  = 15.0, 6.4 Hz, 1H), 3.13 – 3.01 (m, 2H), 2.94 (dddd,  $J$  = 17.1, 9.5, 7.4, 1.8 Hz, 1H), 2.32 (dddd,  $J$  = 12.8, 9.9, 7.7, 4.9 Hz, 1H), 1.76 (dddd,  $J$  = 12.8, 9.9, 7.4, 6.4 Hz, 1H);

**$^{13}C$  NMR** (151 MHz,  $CDCl_3$ ):  $\delta$  172.86, 159.27, 154.85, 135.63, 134.71, 134.17, 131.42, 131.00, 130.46, 128.44, 127.86, 123.94, 113.71, 70.82, 41.10, 35.14, 29.30, 29.03;

## SUPPLEMENTARY INFORMATION

**HRMS (ESI) m/z:** calculated for C<sub>20</sub>H<sub>19</sub>ClN<sub>3</sub>O [M+H]<sup>+</sup>: 352.1211, found: 352.1205.

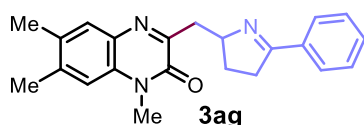

**1,6,7-Trimethyl-3-((5-phenyl-3,4-dihydro-2H-pyrrol-2-yl)methyl)quinoxalin-2(1H)-one (3ag):** 56.5 mg, 82% yield as a white solid.

**<sup>1</sup>H NMR** (600 MHz, CDCl<sub>3</sub>): δ 7.86 – 7.79 (m, 2H), 7.60 (s, 1H), 7.42 – 7.34 (m, 3H), 7.05 (s, 1H), 4.92 (ddd, *J* = 8.3, 6.2, 2.0 Hz, 1H), 3.67 (s, 3H), 3.51 (dd, *J* = 14.9, 6.0 Hz, 1H), 3.09 – 3.00 (m, 2H), 2.92 (dddd, *J* = 17.0, 9.6, 7.4, 1.8 Hz, 1H), 2.40 (s, 3H), 2.33 (s, 3H), 2.29 (dddd, *J* = 12.7, 9.8, 7.7, 4.9 Hz, 1H), 1.76 (dddd, *J* = 12.9, 9.9, 7.4, 6.4 Hz, 1H);

**<sup>13</sup>C NMR** (151 MHz, CDCl<sub>3</sub>): δ 172.64, 157.70, 155.21, 139.45, 134.83, 132.40, 131.32, 131.27, 130.34, 130.03, 128.39, 127.86, 114.23, 70.98, 41.02, 35.08, 29.06, 28.91, 20.59, 19.24;

**HRMS (ESI) m/z:** calculated for C<sub>22</sub>H<sub>24</sub>N<sub>3</sub>O [M+H]<sup>+</sup>: 346.1914, found: 346.1911.

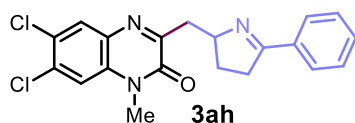

**6,7-Dichloro-1-methyl-3-((5-phenyl-3,4-dihydro-2H-pyrrol-2-yl)methyl)quinoxalin-2(1H)-one (3ah):** 66.5 mg, 86% yield as a white solid.

**<sup>1</sup>H NMR** (600 MHz, CDCl<sub>3</sub>): δ 7.92 (s, 1H), 7.84 – 7.78 (m, 2H), 7.43 – 7.34 (m, 4H), 4.89 (qdd, *J* = 8.4, 5.2, 2.1 Hz, 1H), 3.64 (s, 3H), 3.45 (dd, *J* = 15.2, 6.5 Hz, 1H), 3.13 – 3.02 (m, 2H), 2.94 (dddd, *J* = 17.1, 9.6, 7.5, 1.8 Hz, 1H), 2.33 (dddd, *J* = 12.7, 9.9, 7.7, 4.9 Hz, 1H), 1.74 (ddt, *J* = 12.9, 10.0, 7.1 Hz, 1H);

**<sup>13</sup>C NMR** (151 MHz, CDCl<sub>3</sub>): δ 172.92, 160.80, 154.54, 134.68, 133.74, 132.74, 131.97, 130.77, 130.50, 128.46, 127.86, 127.29, 115.17, 70.71, 41.17, 35.15, 29.43, 29.09;

**HRMS (ESI) m/z:** calculated for C<sub>20</sub>H<sub>18</sub>Cl<sub>2</sub>N<sub>3</sub>O [M+H]<sup>+</sup>: 386.0821, found: 386.0815.

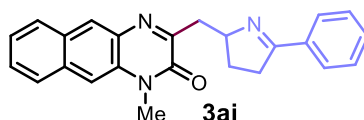

**1-Methyl-3-((5-phenyl-3,4-dihydro-2H-pyrrol-2-yl)methyl)benzo[g]quinoxalin-2(1H)-one (3ai):** 48.6 mg, 66% yield as a white solid.

**<sup>1</sup>H NMR** (600 MHz, CDCl<sub>3</sub>): δ 8.32 (s, 1H), 7.94 (d, *J* = 8.3 Hz, 1H), 7.88 (d, *J* = 8.3 Hz, 1H), 7.86 – 7.82 (m, 2H), 7.58 – 7.51 (m, 2H), 7.46 (ddd, *J* = 8.0, 6.7, 1.2 Hz, 1H), 7.43 – 7.35 (m, 3H), 5.04 – 4.93 (m, 1H), 3.72 (s, 3H), 3.56 (dd, *J* = 15.0, 6.2 Hz, 1H), 3.17 – 3.04 (m, 2H), 2.95 (dddd, *J* = 17.0, 9.6, 7.5, 1.8 Hz, 1H), 2.37 (dddd, *J* = 12.8, 9.9, 7.8, 4.9 Hz, 1H), 1.81 (ddt, *J* = 12.9, 9.9, 7.0 Hz, 1H);

**<sup>13</sup>C NMR** (151 MHz, CDCl<sub>3</sub>): δ 172.83, 159.61, 154.93, 134.75, 133.46, 132.22, 131.92, 130.43, 129.77, 128.86, 128.48, 128.43, 127.88, 127.70, 127.23, 125.25, 109.91, 70.95, 41.22, 35.13, 29.12, 29.05;

**HRMS (ESI) m/z:** calculated for C<sub>22</sub>H<sub>24</sub>N<sub>3</sub>O [M+H]<sup>+</sup>: 368.1757, found: 368.1756.

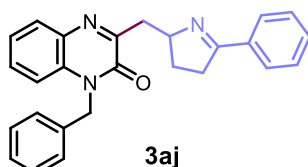

**1-Benzyl-3-((5-phenyl-3,4-dihydro-2H-pyrrol-2-yl)methyl)quinoxalin-2(1H)-one (3aj):** 74.5 mg, 94% yield as a pale yellow solid.

**<sup>1</sup>H NMR** (600 MHz, CDCl<sub>3</sub>): δ 7.86 (dd, *J* = 7.9, 1.5 Hz, 1H), 7.85 – 7.80 (m, 2H), 7.43 – 7.35 (m, 4H), 7.33 – 7.19 (m, 7H), 5.62 – 5.38 (m, 2H), 4.97 (dtdd, *J* = 8.4, 6.6, 4.1, 1.9 Hz, 1H), 3.57 (dd, *J* = 14.8, 6.5 Hz, 1H), 3.18 (dd, *J* = 14.9, 8.2 Hz, 1H), 3.08 (dddd, *J* = 17.0, 10.0, 4.9, 2.2 Hz, 1H), 2.95 (dddd, *J* = 17.1, 9.6, 7.5, 1.8 Hz, 1H), 2.36 (dddd, *J* = 12.7, 9.9, 7.7, 4.8 Hz, 1H), 1.82 (ddt, *J* = 12.9, 10.0, 7.1 Hz, 1H);

**<sup>13</sup>C NMR** (151 MHz, CDCl<sub>3</sub>): δ 172.74, 159.37, 155.25, 135.49, 134.82, 133.18, 132.63, 130.38, 130.06, 129.74, 129.01, 128.42, 127.88, 127.72, 126.99, 123.61, 114.47, 71.20, 45.98, 40.99, 35.15, 29.07;

**HRMS (ESI) m/z:** calculated for C<sub>26</sub>H<sub>24</sub>N<sub>3</sub>O [M+H]<sup>+</sup>: 394.1914, found: 394.1911.

## SUPPLEMENTARY INFORMATION

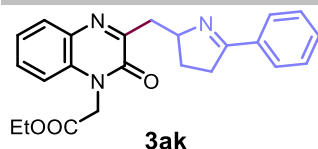

**Ethyl 2-(2-oxo-3-((5-phenyl-3,4-dihydro-2H-pyrrol-2-yl)methyl)quinoxalin-1(2H)-yl)acetate (3ak):** 73.2 mg, 94% yield as a white solid.

**<sup>1</sup>H NMR** (600 MHz, CDCl<sub>3</sub>): δ 7.87 (dd, *J* = 8.0, 1.5 Hz, 1H), 7.86 – 7.80 (m, 2H), 7.49 (ddd, *J* = 8.6, 7.3, 1.5 Hz, 1H), 7.43 – 7.36 (m, 3H), 7.35 – 7.31 (m, 1H), 7.06 (dd, *J* = 8.4, 1.2 Hz, 1H), 5.03 (s, 2H), 4.97 – 4.89 (m, 1H), 4.24 (q, *J* = 7.1 Hz, 2H), 3.55 (dd, *J* = 15.1, 6.0 Hz, 1H), 3.14 – 3.03 (m, 2H), 2.94 (dddd, *J* = 17.0, 9.7, 7.5, 1.8 Hz, 1H), 2.33 (dddd, *J* = 12.7, 9.9, 7.7, 4.9 Hz, 1H), 1.79 (ddt, *J* = 12.9, 10.0, 7.1 Hz, 1H), 1.27 (t, *J* = 7.1 Hz, 3H);

**<sup>13</sup>C NMR** (151 MHz, CDCl<sub>3</sub>): δ 172.86, 167.30, 158.93, 154.72, 134.76, 132.98, 132.43, 130.44, 130.30, 129.95, 128.44, 127.90, 123.90, 113.12, 70.88, 62.13, 43.65, 40.85, 35.15, 28.96, 14.21;

**HRMS (ESI) m/z:** calculated for C<sub>23</sub>H<sub>24</sub>N<sub>3</sub>O<sub>3</sub> [M+H]<sup>+</sup>: 390.1812, found: 390.1804.

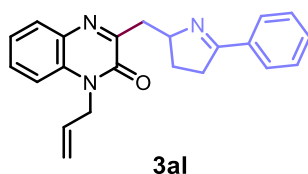

**1-Allyl-3-((5-phenyl-3,4-dihydro-2H-pyrrol-2-yl)methyl)quinoxalin-2(1H)-one (3al):** 63.2 mg, 92% yield as a white solid.

**<sup>1</sup>H NMR** (600 MHz, CDCl<sub>3</sub>): δ 7.86 (d, *J* = 8.0 Hz, 1H), 7.84 – 7.79 (m, 2H), 7.48 (t, *J* = 7.8 Hz, 1H), 7.38 (dq, *J* = 13.9, 6.9 Hz, 3H), 7.31 (t, *J* = 7.6 Hz, 1H), 7.27 (d, *J* = 8.5 Hz, 1H), 5.94 (ddt, *J* = 15.9, 10.3, 5.1 Hz, 1H), 5.26 (d, *J* = 10.5 Hz, 1H), 5.18 (d, *J* = 17.2 Hz, 1H), 5.01 – 4.84 (m, 3H), 3.52 (dd, *J* = 15.0, 6.3 Hz, 1H), 3.18 – 3.01 (m, 2H), 2.94 (ddd, *J* = 17.1, 9.7, 7.7 Hz, 1H), 2.41 – 2.27 (m, 1H), 1.79 (ddt, *J* = 13.4, 9.9, 7.0 Hz, 1H);

**<sup>13</sup>C NMR** (151 MHz, CDCl<sub>3</sub>): δ 172.74, 159.20, 154.71, 134.79, 133.08, 132.51, 130.87, 130.39, 130.04, 129.67, 128.41, 127.87, 123.55, 118.11, 114.21, 71.00, 44.58, 40.92, 35.13, 29.01;

**HRMS (ESI) m/z:** calculated for C<sub>22</sub>H<sub>22</sub>N<sub>3</sub>O [M+H]<sup>+</sup>: 344.1757, found: 344.1750.

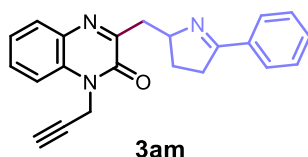

**3-((5-Phenyl-3,4-dihydro-2H-pyrrol-2-yl)methyl)-1-(prop-2-yn-1-yl)quinoxalin-2(1H)-one (3am):** 63.4 mg, 93% yield as a white solid.

**<sup>1</sup>H NMR** (600 MHz, CDCl<sub>3</sub>): δ 7.87 (dd, *J* = 7.9, 1.5 Hz, 1H), 7.85 – 7.79 (m, 2H), 7.56 (ddd, *J* = 8.6, 7.2, 1.5 Hz, 1H), 7.45 (dd, *J* = 8.4, 1.2 Hz, 1H), 7.43 – 7.33 (m, 4H), 5.06 (d, *J* = 2.6 Hz, 2H), 4.93 (tt, *J* = 8.2, 6.3 Hz, 1H), 3.51 (dd, *J* = 15.0, 6.3 Hz, 1H), 3.16 – 3.03 (m, 2H), 2.94 (dddd, *J* = 17.0, 9.6, 7.5, 1.8 Hz, 1H), 2.34 (dddd, *J* = 12.8, 9.8, 7.7, 4.9 Hz, 1H), 2.29 (t, *J* = 2.5 Hz, 1H), 1.78 (ddt, *J* = 12.8, 9.9, 7.0 Hz, 1H);

**<sup>13</sup>C NMR** (151 MHz, CDCl<sub>3</sub>): δ 172.84, 159.01, 154.11, 134.75, 133.10, 131.77, 130.42, 130.11, 129.88, 128.43, 127.88, 123.96, 114.16, 77.02, 73.28, 70.87, 41.00, 35.13, 31.57, 29.03;

**HRMS (ESI) m/z:** calculated for C<sub>22</sub>H<sub>20</sub>N<sub>3</sub>O [M+H]<sup>+</sup>: 342.1601, found: 342.1595.

## SUPPLEMENTARY INFORMATION

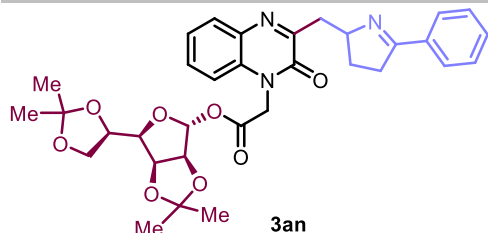

3an

**(3aS,4R,6R,6aS)-6-((R)-2,2-dimethyl-1,3-dioxolan-4-yl)-2,2-dimethyltetrahydrofuro[3,4-d][1,3]dioxol-4-yl 2-(2-oxo-3-((5-phenyl-3,4-dihydro-2H-pyrrol-2-yl)methyl)quinoxalin-1(2H)-yl)acetate (3an):** 114.6 mg, 95% yield as a white solid.

**<sup>1</sup>H NMR** (600 MHz, CDCl<sub>3</sub>): δ 7.86 (dt, *J* = 8.0, 1.6 Hz, 1H), 7.83 – 7.77 (m, 2H), 7.50 (ddd, *J* = 8.6, 7.3, 1.6 Hz, 1H), 7.41 – 7.29 (m, 4H), 7.03 (dd, *J* = 8.4, 1.2 Hz, 1H), 6.19 (d, *J* = 1.3 Hz, 1H), 5.08 – 4.97 (m, 2H), 4.96 – 4.86 (m, 1H), 4.78 (td, *J* = 6.2, 3.5 Hz, 1H), 4.69 (d, *J* = 5.8 Hz, 1H), 4.35 (dddd, *J* = 8.9, 6.9, 4.2, 2.8 Hz, 1H), 4.06 (ddd, *J* = 8.0, 6.2, 1.7 Hz, 1H), 3.96 (dt, *J* = 8.9, 4.4 Hz, 1H), 3.89 (ddd, *J* = 9.4, 7.9, 3.6 Hz, 1H), 3.51 (ddd, *J* = 14.9, 6.2, 3.1 Hz, 1H), 3.15 – 3.00 (m, 2H), 2.92 (dddd, *J* = 17.0, 9.6, 7.4, 1.8 Hz, 1H), 2.31 (dddt, *J* = 12.6, 9.6, 7.7, 4.7 Hz, 1H), 1.77 (ddt, *J* = 12.9, 10.0, 7.1 Hz, 1H), 1.44 (d, *J* = 1.3 Hz, 3H), 1.42 (d, *J* = 2.0 Hz, 3H), 1.36 (s, 3H), 1.29 (d, *J* = 2.0 Hz, 3H);

**<sup>13</sup>C NMR** (151 MHz, CDCl<sub>3</sub>): δ 172.80, 172.77, 165.92, 165.91, 158.83, 158.81, 154.56, 134.69, 132.88, 132.16, 132.14, 130.38, 130.33, 130.07, 128.39, 127.82, 124.07, 113.45, 112.92, 109.47, 102.12, 102.09, 84.95, 82.79, 79.13, 72.73, 70.86, 70.81, 66.79, 43.51, 40.92, 40.78, 35.10, 28.95, 28.93, 27.03, 25.93, 25.19, 24.63;

**HRMS (ESI) m/z:** calculated for C<sub>33</sub>H<sub>38</sub>N<sub>3</sub>O<sub>8</sub> [M+H]<sup>+</sup>: 604.2653, found: 604.2645.

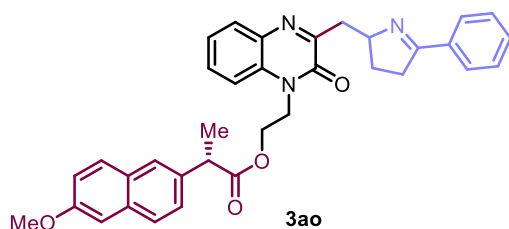

3ao

**2-(2-Oxo-3-((5-phenyl-3,4-dihydro-2H-pyrrol-2-yl)methyl)quinoxalin-1(2H)-yl)ethyl (2S)-2-(6-methoxynaphthalen-2-yl)propanoate (3ao):** 99.5 mg, 89% yield as a white solid.

**<sup>1</sup>H NMR** (600 MHz, CDCl<sub>3</sub>): δ 7.79 (tt, *J* = 8.4, 1.6 Hz, 3H), 7.61 (ddd, *J* = 8.8, 5.5, 3.8 Hz, 2H), 7.51 (t, *J* = 2.5 Hz, 1H), 7.40 – 7.32 (m, 3H), 7.29 – 7.18 (m, 4H), 7.11 (ddd, *J* = 8.9, 2.5, 1.4 Hz, 1H), 7.06 (d, *J* = 2.5 Hz, 1H), 4.89 (qdd, *J* = 8.2, 6.2, 2.0 Hz, 1H), 4.53 – 4.32 (m, 4H), 3.86 (s, 3H), 3.72 (q, *J* = 7.2 Hz, 1H), 3.48 (ddd, *J* = 15.0, 6.2, 1.7 Hz, 1H), 3.09 – 2.97 (m, 2H), 2.88 (dddt, *J* = 17.0, 9.5, 7.4, 1.9 Hz, 1H), 2.26 (dddd, *J* = 12.7, 9.8, 7.7, 4.8 Hz, 1H), 1.79 – 1.67 (m, 1H), 1.48 (dd, *J* = 7.2, 1.3 Hz, 3H);

**<sup>13</sup>C NMR** (151 MHz, CDCl<sub>3</sub>): δ 174.61, 172.66, 158.76, 157.72, 154.83, 135.14, 134.70, 133.75, 132.90, 132.68, 130.33, 130.00, 129.63, 129.28, 128.88, 128.35, 127.78, 127.24, 126.02, 125.99, 123.47, 119.05, 113.64, 105.61, 70.88, 61.30, 55.31, 45.31, 40.93, 40.77, 35.03, 28.90, 18.38;

**HRMS (ESI) m/z:** calculated for C<sub>35</sub>H<sub>34</sub>N<sub>3</sub>O<sub>4</sub> [M+H]<sup>+</sup>: 560.2544, found: 560.2539.

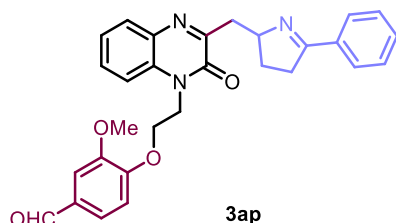

3ap

**3-Methoxy-4-(2-(2-oxo-3-((5-phenyl-3,4-dihydro-2H-pyrrol-2-yl)methyl)quinoxalin-1(2H)-yl)ethoxy)benzaldehyde (3ap):** 78.9 mg, 82% yield as a white solid.

**<sup>1</sup>H NMR** (600 MHz, CDCl<sub>3</sub>): δ 9.80 (s, 1H), 7.99 (dd, *J* = 8.1, 1.5 Hz, 1H), 7.80 (dt, *J* = 8.5, 1.7 Hz, 3H), 7.62 (ddd, *J* = 8.3, 6.9, 1.5 Hz, 1H), 7.55 (ddd, *J* = 8.3, 7.0, 1.5 Hz, 1H), 7.44 – 7.34 (m, 5H), 7.08 (d, *J* = 8.2 Hz, 1H), 4.94 (dd, *J* = 5.7, 4.4 Hz, 2H), 4.89 (dddd, *J* = 11.9, 7.7, 4.7, 2.8 Hz, 1H), 4.54 (t, *J* = 5.1 Hz, 2H), 3.83 (s, 3H), 3.65 (dd, *J* = 14.2, 5.7 Hz, 1H), 3.07 – 2.95 (m, 2H), 2.93 – 2.81 (m, 1H), 2.17 (dddd, *J* = 12.8, 9.9, 7.7, 5.1 Hz, 1H), 1.78 (dddd, *J* = 13.2, 9.9, 7.2, 6.2 Hz, 1H);

## SUPPLEMENTARY INFORMATION

$^{13}\text{C}$  NMR (151 MHz,  $\text{CDCl}_3$ ):  $\delta$  190.97, 172.70, 155.82, 153.76, 150.11, 149.14, 139.66, 139.01, 134.66, 130.58, 130.53, 129.24, 128.59, 128.51, 127.80, 126.87, 126.71, 126.64, 112.31, 109.63, 71.38, 67.09, 64.43, 56.02, 40.18, 35.01, 28.55;

HRMS (ESI)  $m/z$ : calculated for  $\text{C}_{29}\text{H}_{28}\text{N}_3\text{O}_4$   $[\text{M}+\text{H}]^+$ : 482.2074, found: 482.2071.

### 3.2 Synthesis Procedure and Characterization of Product 5

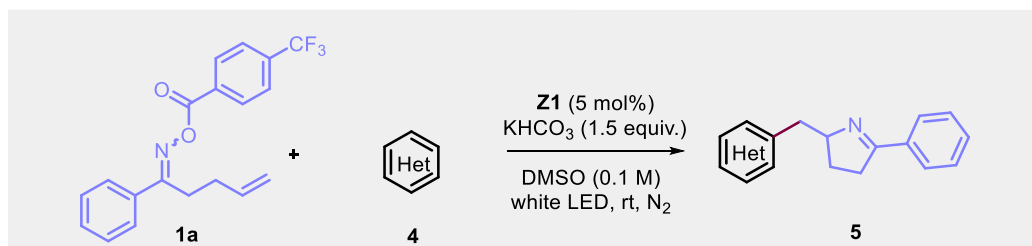

An oven-dried Schlenk tube equipped with a stirring bar was charged with **1** (0.2 mmol, 69.47 mg, 1.0 equiv.), **4** (0.3 mmol, 1.5 equiv.), **Z1** (0.01 mmol, 4.19 mg, 5 mol%) and  $\text{KHCO}_3$  (0.3 mmol, 30.0 mg, 1.5 equiv.). After refilling with  $\text{N}_2$  repeated three times, DMSO (2.0 mL) was added through syringe. The mixture was stirred at room temperature in front of a 20 W white light LED bulb. Upon completion, water and EtOAc were added and the mixture was stirred for 10 min. The layers were separated and the aqueous layer was extracted with EtOAc. The combined organic layers were then washed with brine, dried over  $\text{Na}_2\text{SO}_4$  and concentrated in vacuo. The residue was purified by column chromatography on silica gel to afford the corresponding product.

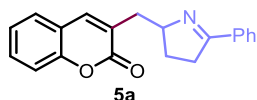

**3-((5-Phenyl-3,4-dihydro-2H-pyrrol-2-yl)methyl)-2H-chromen-2-one (5a)**: 49.7 mg, 82% yield as a white solid after 24 h irradiation.

$^1\text{H}$  NMR (600 MHz,  $\text{CDCl}_3$ ):  $\delta$  7.84 – 7.75 (m, 2H), 7.75 (s, 1H), 7.49 – 7.44 (m, 2H), 7.44 – 7.37 (m, 3H), 7.32 (dd,  $J$  = 8.3, 1.0 Hz, 1H), 7.26 – 7.22 (m, 1H), 4.59 (pt,  $J$  = 7.0, 2.0 Hz, 1H), 3.03 (dddd,  $J$  = 16.8, 9.9, 4.6, 2.1 Hz, 1H), 2.96 – 2.85 (m, 3H), 2.28 (dddd,  $J$  = 12.5, 9.8, 7.7, 4.6 Hz, 1H), 1.72 (dddd,  $J$  = 12.8, 9.9, 7.8, 6.8 Hz, 1H);

$^{13}\text{C}$  NMR (151 MHz,  $\text{CDCl}_3$ ):  $\delta$  172.99, 162.29, 153.40, 140.79, 134.62, 130.77, 130.60, 128.54, 127.81, 127.53, 127.42, 124.34, 119.79, 116.52, 71.59, 37.54, 35.16, 28.88;

HRMS (ESI)  $m/z$ : calculated for  $\text{C}_{20}\text{H}_{18}\text{N}_2\text{O}$   $[\text{M}+\text{H}]^+$ : 304.1332, found: 304.1329.

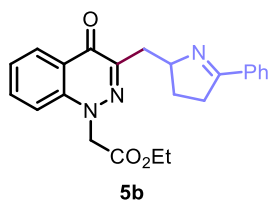

**Ethyl 2-(4-oxo-3-((5-phenyl-3,4-dihydro-2H-pyrrol-2-yl)methyl)cinnolin-1(4H)-yl)acetate (5b)**: 73.9 mg, 95% yield as a yellow solid after 12 h irradiation.

$^1\text{H}$  NMR (600 MHz,  $\text{CDCl}_3$ ):  $\delta$  8.35 (dd,  $J$  = 8.1, 1.5 Hz, 1H), 7.86 – 7.79 (m, 2H), 7.67 (ddd,  $J$  = 8.7, 7.0, 1.6 Hz, 1H), 7.42 – 7.34 (m, 4H), 7.17 (d,  $J$  = 8.7 Hz, 1H), 5.10 (s, 2H), 4.78 (tt,  $J$  = 7.9, 6.0 Hz, 1H), 4.22 (q,  $J$  = 7.1 Hz, 2H), 3.40 (dd,  $J$  = 14.2, 5.8 Hz, 1H), 3.06 – 2.93 (m, 2H), 2.88 (dddd,  $J$  = 17.1, 9.6, 7.3, 1.8 Hz, 1H), 2.18 (dddd,  $J$  = 12.8, 9.9, 7.8, 5.0 Hz, 1H), 1.76 (ddt,  $J$  = 13.3, 9.9, 7.0 Hz, 1H), 1.24 (t,  $J$  = 7.1 Hz, 4H);

$^{13}\text{C}$  NMR (151 MHz,  $\text{CDCl}_3$ ):  $\delta$  172.57, 170.98, 167.55, 149.64, 141.40, 134.86, 133.82, 130.34, 128.41, 127.84, 126.51, 124.43, 123.08, 114.07, 71.16, 62.15, 56.78, 36.65, 35.09, 28.53, 14.19;

HRMS (ESI)  $m/z$ : calculated for  $\text{C}_{23}\text{H}_{23}\text{N}_3\text{NaO}_3$   $[\text{M}+\text{Na}]^+$ : 412.1632, found: 412.1627.

## SUPPLEMENTARY INFORMATION

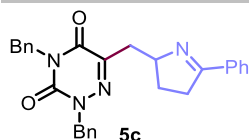

**2,4-Dibenzyl-6-((5-phenyl-3,4-dihydro-2H-pyrrol-2-yl)methyl)-1,2,4-triazine-3,5(2H,4H)-dione (5c):** 81.0 mg, 90% yield as a white solid after 24 h irradiation.

**<sup>1</sup>H NMR** (600 MHz, CDCl<sub>3</sub>): δ 7.81 – 7.80 (m, 2H), 7.51 – 7.50 (m, 2H), 7.41 (ddd, *J* = 14.7, 7.9, 6.1 Hz, 5H), 7.36 – 7.27 (m, 6H), 5.20 – 5.04 (m, 4H), 4.67 (tdd, *J* = 9.3, 7.1, 3.5 Hz, 1H), 3.11 – 2.98 (m, 2H), 2.92 (dddd, *J* = 17.1, 9.7, 7.6, 1.8 Hz, 1H), 2.85 (dd, *J* = 14.8, 7.5 Hz, 1H), 2.25 (dddd, *J* = 12.7, 9.8, 7.8, 4.8 Hz, 1H), 1.67 (ddt, *J* = 12.9, 10.0, 7.2 Hz, 1H);

**<sup>13</sup>C NMR** (151 MHz, CDCl<sub>3</sub>): δ 172.89, 156.27, 149.12, 143.97, 135.98, 135.81, 134.60, 130.57, 129.55, 128.78, 128.76, 128.66, 128.51, 128.22, 128.11, 127.86, 70.54, 55.39, 44.32, 37.27, 35.12, 28.81;

**HRMS (ESI) *m/z***: calculated for C<sub>28</sub>H<sub>27</sub>N<sub>4</sub>O<sub>2</sub> [M+H]<sup>+</sup>: 451.2129, found: 451.2127.

### 3.3 Synthesis Procedure and Characterization of Product 7

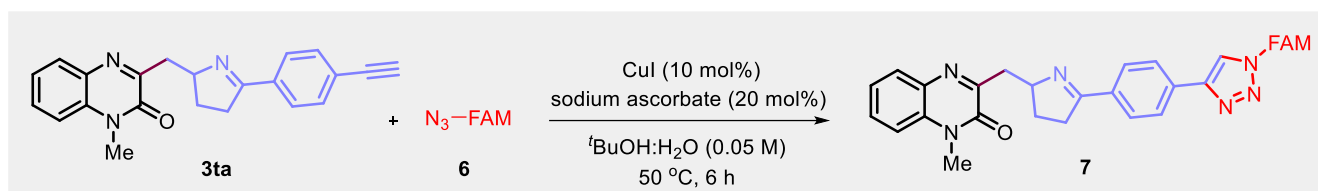

FAM azide **6** (cas: 1386385-76-7, 5.0 nmol, 2.29 mg, 1.0 equiv.) was mixed with **3ta** (5.0 nmol, 1.71 mg, 1.0 equiv.) in 1:1 mixture of *t*BuOH:H<sub>2</sub>O (100 μL). To this mixture was added CuSO<sub>4</sub>·5H<sub>2</sub>O (0.50 nmol, 0.12 mg, 10 mol%) and sodium ascorbate (1.0 nmol, 0.20 mg, 20 mol%). The reaction was stirred at 50 °C for 6 h, then extracted with ethyl acetate, washed twice with dilute aqueous ammonium hydroxide and once with brine. The aqueous layer was back extracted once into ethyl acetate. The organic layers were combined, dried over Na<sub>2</sub>SO<sub>4</sub>, and evaporated to dryness. Then the product **7** was validated by HRMS.

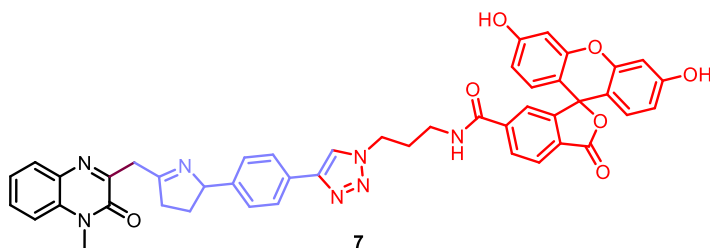

**3',6'-Dihydroxy-N-(3-(4-(4-(5-((4-methyl-3-oxo-3,4-dihydroquinoxalin-2-yl)methyl)-3,4-dihydro-2H-pyrrol-2-yl)phenyl)-1H-1,2,3-triazol-1-yl)propyl)-3-oxo-3H-spiro[isobenzofuran-1,9'-xanthene]-6-carboxamide (7).**

**HRMS (ESI) *m/z***: calculated for C<sub>46</sub>H<sub>38</sub>N<sub>7</sub>O<sub>7</sub> [M+H]<sup>+</sup>: 800.2827, found: 800.2823.

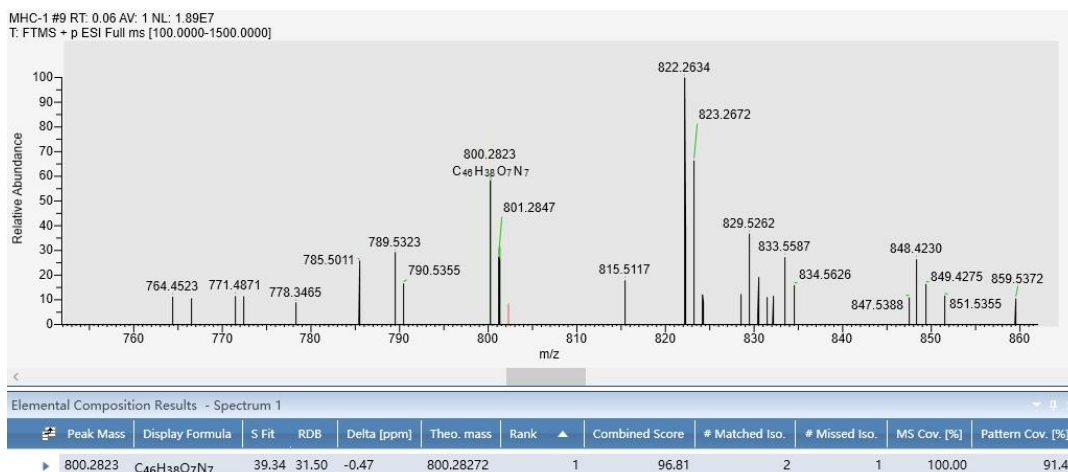

## SUPPLEMENTARY INFORMATION

### 3.4 Gram Scale Synthesis Procedure of Product 3aa and 3aj

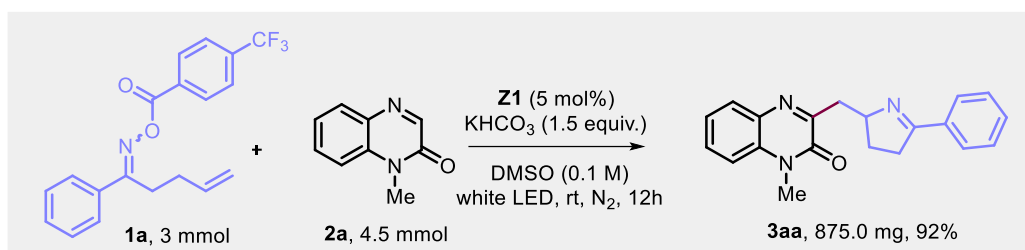

An oven-dried 100 mL Schlenk tube equipped with a stirring bar was charged with **1a** (3.0 mmol, 1.04 g, 1.0 equiv.), **2a** (4.5 mmol, 720.80 mg, 1.5 equiv.), **Z1** (0.15 mmol, 62.91 mg, 5 mol%) and  $\text{KHCO}_3$  (4.5 mmol, 450.51 mg, 1.5 equiv.). After refilling with  $\text{N}_2$  repeated three times, DMSO (30.0 mL) was added through syringe. The mixture was stirred at room temperature for 12 h in front of a 20 W white LED bulb. Water and EtOAc were added and the mixture was stirred for 20 min. The layers were separated and the aqueous layer was extracted with EtOAc. The combined organic layers were then washed with brine, dried over  $\text{Na}_2\text{SO}_4$  and concentrated in vacuo. The residue was purified by column chromatography on silica gel to afford the corresponding product **3aa** (875.0 mg, 92%).

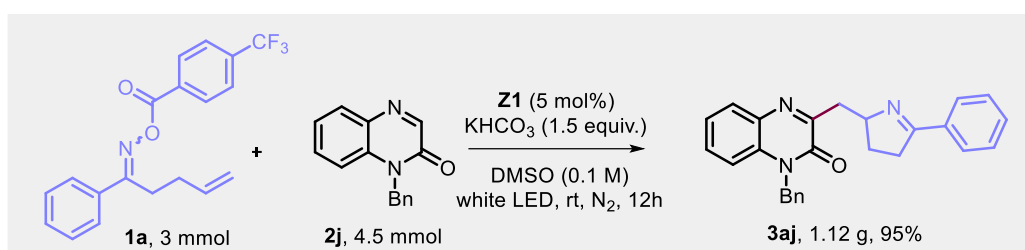

An oven-dried 100 mL Schlenk tube equipped with a stirring bar was charged with **1a** (3.0 mmol, 1.04 g, 1.0 equiv.), **2j** (4.5 mmol, 1.06 g, 1.5 equiv.), **Z1** (0.15 mmol, 62.91 mg, 5 mol%) and  $\text{KHCO}_3$  (4.5 mmol, 450.51 mg, 1.5 equiv.). After refilling with  $\text{N}_2$  repeated three times, DMSO (30.0 mL) was added through syringe. The mixture was stirred at room temperature for 12 h in front of a 20 W white LED bulb. Water and EtOAc were added and the mixture was stirred for 20 min. The layers were separated and the aqueous layer was extracted with EtOAc. The combined organic layers were then washed with brine, dried over  $\text{Na}_2\text{SO}_4$  and concentrated in vacuo. The residue was purified by column chromatography on silica gel to afford the corresponding product **3aj** (1.12 g, 95%).



## 3. Mechanisms Study Experiments

## 4.1 Radical Trap Experiment

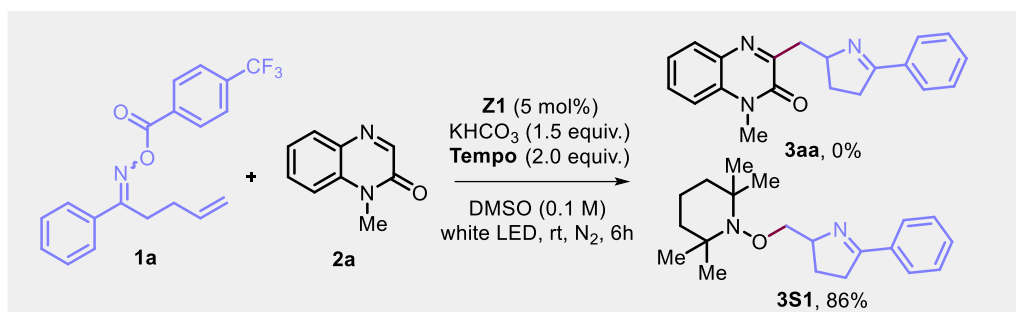

An oven-dried Schlenk tube equipped with a stirring bar was charged with **1a** (0.2 mmol, 69.47 mg, 1.0 equiv.), **2a** (0.3 mmol, 48.05 mg, 1.5 equiv.), **Z1** (0.01 mmol, 4.19 mg, 5 mol%),  $\text{KHCO}_3$  (0.3 mmol, 30.0 mg, 1.5 equiv.) and **Tempo** (0.4 mmol, 62.50 mg, 2.0 equiv.). After refilling with  $\text{N}_2$  repeated three times, DMSO (2.0 mL) was added through syringe. The mixture was stirred at room temperature for 6 h in front of a 20 W white LED bulb. Water and EtOAc were added and the mixture was stirred for 10 min. The layers were separated and the aqueous layer was extracted with EtOAc. The combined organic layers were then washed with brine, dried over  $\text{Na}_2\text{SO}_4$  and concentrated in vacuo. The residue was purified by column chromatography on silica gel to afford the corresponding product.

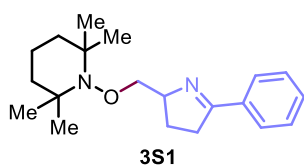

**2,2,6,6-Tetramethyl-1-((5-phenyl-3,4-dihydro-2H-pyrrol-2-yl)methoxy)piperidine (3S1)**: 54.0 mg, 86% yield as a pale yellow solid.  $^1\text{H NMR}$  (600 MHz,  $\text{CDCl}_3$ ):  $\delta$  7.89 – 7.82 (m, 2H), 7.46 – 7.37 (m, 3H), 4.45 (dq,  $J$  = 10.8, 5.2 Hz, 1H), 4.09 (dd,  $J$  = 8.7, 4.2 Hz, 1H), 3.97 (dd,  $J$  = 8.7, 5.2 Hz, 1H), 3.10 – 2.90 (m, 2H), 2.16 (dtd,  $J$  = 12.6, 9.4, 7.0 Hz, 1H), 2.10 – 2.00 (m, 1H), 1.60 – 1.27 (m, 7H), 1.23 (s, 3H), 1.17 (s, 3H), 1.12 (s, 3H), 0.96 (s, 3H);

$^{13}\text{C NMR}$  (151 MHz,  $\text{CDCl}_3$ ):  $\delta$  173.21, 134.52, 130.05, 128.13, 127.49, 78.90, 72.12, 59.65, 39.40, 35.17, 33.00, 32.79, 25.68, 20.02, 19.77, 16.86

**HRMS (ESI)  $m/z$** : calculated for  $\text{C}_{20}\text{H}_{31}\text{N}_2\text{O}$   $[\text{M}+\text{H}]^+$ : 315.2431, found: 315.2428.

## SUPPLEMENTARY INFORMATION

### 4.2 Radical Clock Experiment

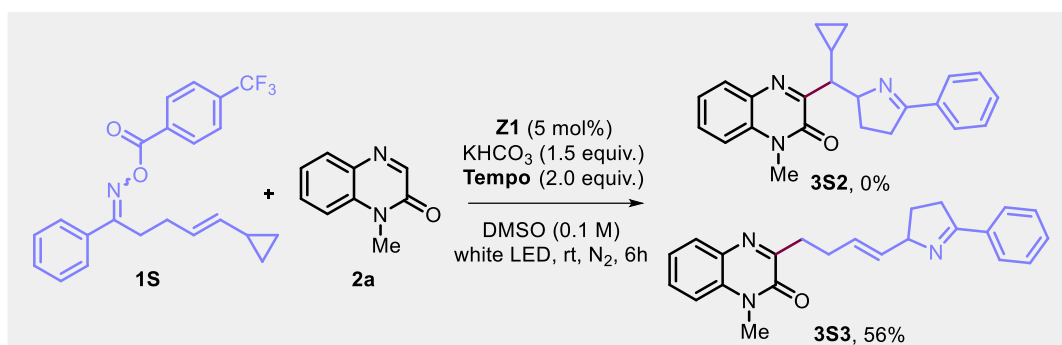

An oven-dried Schlenk tube equipped with a stirring bar was charged with **5** (0.2 mmol, 91.03 mg, 1.0 equiv.), **T4** (0.01 mmol, 5.0 mg, 5 mol%) and  $\text{K}_2\text{CO}_3$  (0.2 mmol, 27.60 mg, 1.0 equiv.). After refilling with  $\text{N}_2$  repeated three times,  $\text{MeCN}$  (1.0 mL) and **2a** (0.6 mmol, 140.65 mg, 3.0 equiv.) was added through syringe. The mixture was stirred at 10 °C in a freezer for 24 h in front of a 20 W white LED bulb. Saturated  $\text{NaHCO}_3$  aqueous solution and  $\text{EtOAc}$  were added and the mixture was stirred for 10 min. The layers were separated and the aqueous layer was extracted with  $\text{EtOAc}$ . The combined organic layers were then washed with brine, dried over  $\text{Na}_2\text{SO}_4$  and concentrated in vacuo. The residue was purified by column chromatography on silica gel to afford the corresponding product.

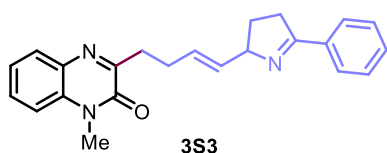

**(E)-1-Phenyl-6-(5-phenyl-3,4-dihydro-2H-pyrrol-2-yl)hex-5-en-1-one (8)**: 39.8 mg, 56% yield as a white solid.

$^1\text{H NMR}$  (600 MHz,  $\text{CDCl}_3$ ):  $\delta$  7.95 (d,  $J = 7.2$  Hz, 2H), 7.86 – 7.82 (m, 2H), 7.81 (dd,  $J = 8.0, 1.5$  Hz, 1H), 7.50 (ddd,  $J = 8.5, 7.2, 1.5$  Hz, 1H), 7.42 – 7.35 (m, 3H), 7.31 (ddd,  $J = 8.3, 7.3, 1.2$  Hz, 1H), 7.27 – 7.25 (m, 1H), 5.83 (dtd,  $J = 14.6, 6.7, 1.1$  Hz, 1H), 5.66 (ddt,  $J = 15.2, 7.2, 1.5$  Hz, 1H), 4.68 (q,  $J = 7.0$  Hz, 1H), 3.67 (s, 4H), 3.07 – 2.96 (m, 3H), 2.87 (dddd,  $J = 16.9, 9.4, 7.5, 1.8$  Hz, 1H), 2.61 – 2.52 (m, 2H), 2.24 (dddd,  $J = 12.8, 9.6, 7.9, 5.0$  Hz, 1H), 1.76 – 1.65 (m, 1H);

$^{13}\text{C NMR}$  (151 MHz,  $\text{CDCl}_3$ ):  $\delta$  173.13, 160.47, 154.94, 134.54, 133.19, 132.79, 130.56, 130.13, 129.76, 129.68, 128.46, 127.89, 123.61, 113.65, 74.39, 35.11, 33.94, 29.73, 29.46, 29.11;

**HRMS (ESI)  $m/z$** : calculated for  $\text{C}_{23}\text{H}_{24}\text{N}_3\text{O}$   $[\text{M}+\text{H}]^+$ : 358.1914, found: 358.1910.

## SUPPLEMENTARY INFORMATION

### 4.3 UV-Vis Absorption Spectroscopic Measurements

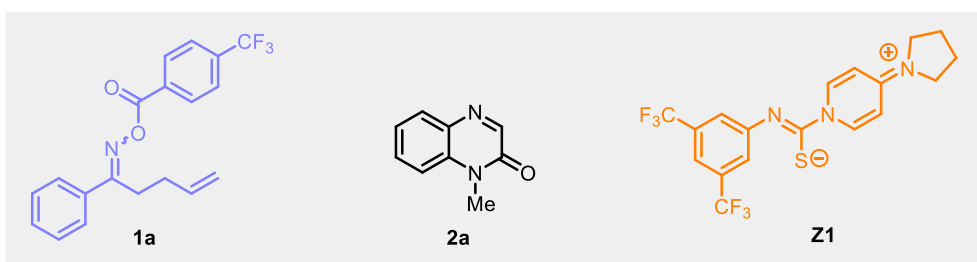

0.1M stock solutions of different starting materials were prepared using DMSO as solvent for measurements. The solutions with  $\text{KHCO}_3$  was stirred under  $\text{N}_2$  for 1 h in dark and the supernatant was separated for measurement.

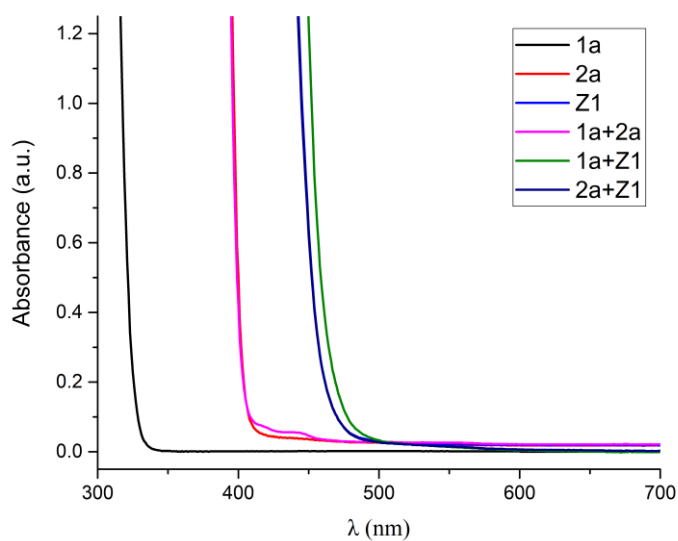

**Figure S1:** UV/vis absorption spectra of the combination between **1a**, **2a**, and **Z1**.

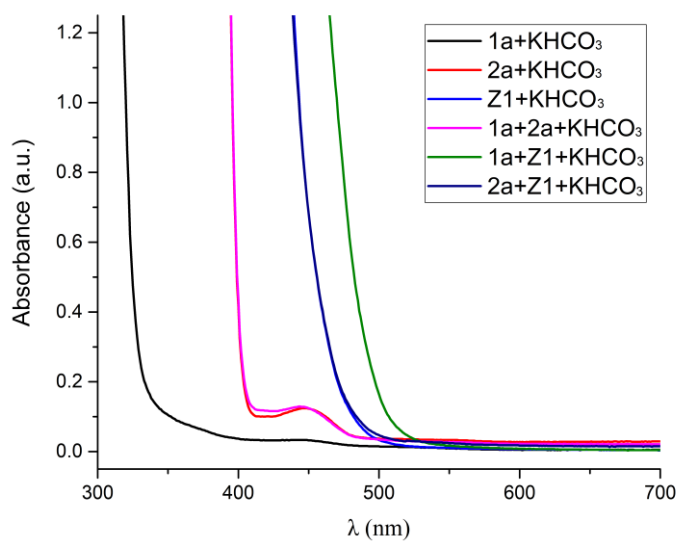

**Figure S2:** UV/vis absorption spectra of the combination between **1a**, **2a**, and **Z1** with  $\text{KHCO}_3$ .

## SUPPLEMENTARY INFORMATION

### 4.4 Job's Plot Experiment

Eleven measurements with **Z1** molar fraction of 0, 10%, 20%, 30%, 40%, 50%, 60%, 70%, 80%, 90%, 100% of the combination of **1a** and **Z1** were recorded in the solution with  $\text{KHCO}_3$ . The absorbance obtained at 480 nm was selected and plotted.

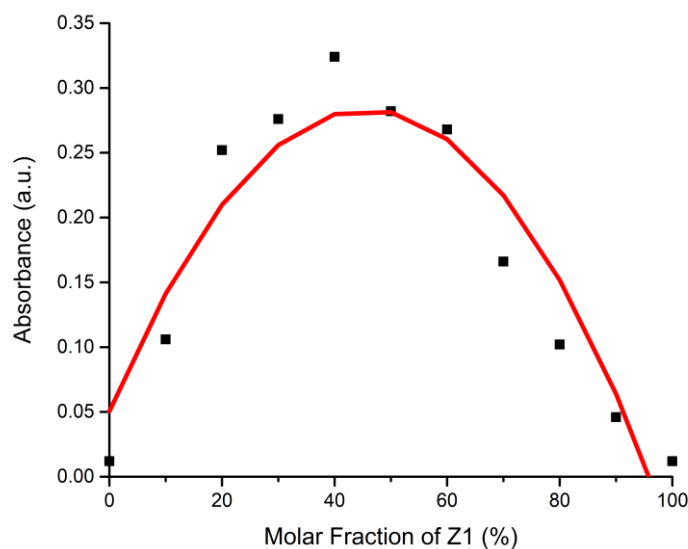

Figure S3: Job's plot of the EDA complexes with UV-Vis absorption spectrometry.

### 4.5 On-Off-On Experiment

A series of identical reactions between **1a** and **2a** were conducted under the standard conditions on a 0.2 mmol scale, using DMSO as the solvent, and employing 5 mol% of **Z1** with 1.5 equiv. of  $\text{KHCO}_3$ . The mixture was subjected to sequential periods of stirring under 20 W white LED irradiation followed by stirring in the absence of light. At each time point (0.5 h, 1.0 h, 1.5 h, ..., 7 h, 8 h, 10 h), one of the reactions was terminated and separated, and the yields of **3aa** were recorded.

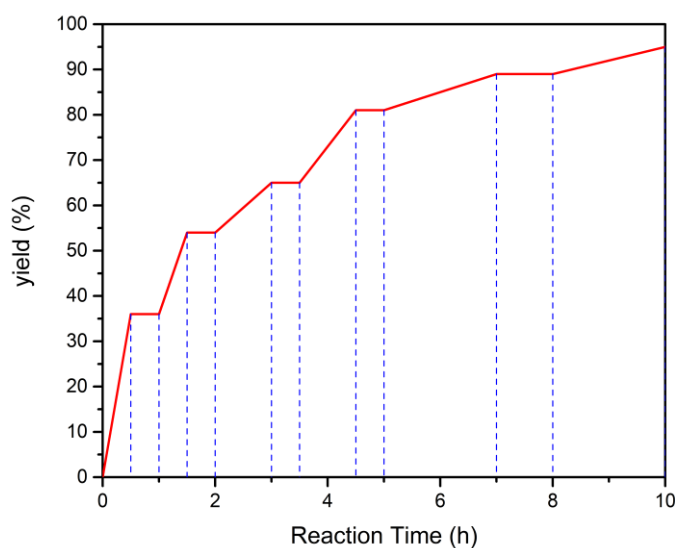

Figure S4: On-Off-On experiment over the time.

## References

1. S.-H. Cai, J.-H. Xie, S. Song, L. Ye, C. Feng and T.-P. Loh, Visible-Light-Promoted Carboimination of Unactivated Alkenes for the Synthesis of Densely Functionalized Pyrroline Derivatives, *ACS Catal.*, 2016, **6**, 5571-5574.
2. X. Shen, C. Huang, X. A. Yuan and S. Yu, Diastereoselective and Stereodivergent Synthesis of 2-Cinnamylpyrrolines Enabled by Photoredox-Catalyzed Iminoalkenylation of Alkenes, *Angew. Chem. Int. Ed.*, 2021, **60**, 9672-9679.
3. H. Mao, Y. Zhang, H. Cao, Q. Shi, Y. Lan, J. Chang and B. Zhu, Thiourea as a precatalyst for the electron donor–acceptor complex photoactivation platform of oxime esters, *Org. Chem. Front.*, 2024, **11**, 3204-3213.
4. L. Liu, N. Pan, W. Sheng, L. Su, L. Liu, J. Dong, Y. Zhou and S. F. Yin, Visible Light - Induced Regioselective Decarboxylative Alkylation of the C(sp<sup>2</sup>)–H Bonds of Non - Aromatic Heterocycles, *Adv. Synth. Catal.*, 2019, **361**, 4126-4132.
5. M.-C. Wu, M.-Z. Li, J.-Y. Chen, J.-A. Xiao, H.-Y. Xiang, K. Chen and H. Yang, Photoredox-catalysed chlorination of quinoxalin-2(1H)-ones enabled by using CHCl<sub>3</sub> as a chlorine source, *Chem. Commun.*, 2022, **58**, 11591-11594.
6. K. Sun, A. Shi, Y. Liu, X. Chen, P. Xiang, X. Wang, L. Qu and B. Yu, A general electron donor-acceptor complex for photoactivation of arenes via thianthrenation, *Chem. Sci.*, 2022, **13**, 5659-5666.
7. Y. A. Cheng, T. Chen, C. K. Tan, J. J. Heng and Y. Y. Yeung, Efficient medium ring size bromolactonization using a sulfur-based zwitterionic organocatalyst, *J. Am. Chem. Soc.*, 2012, **134**, 16492-16495.
8. K. Ishihara, M. Niwa and Y. Kosugi, Zwitterionic Salts as Mild Organocatalysts for Transesterification, *Org. Lett.*, 2008, **10**, 2187-2190.
9. L. Jin, Z. Song, H. Zhang, Z. Zhou and W. Feng, (Chlorosulfonyl)(trifluoromethanesulfonyl)imide-a versatile building block for battery electrolytes, *Energy Advances*, 2023, **2**, 1122-1126.

# SUPPLEMENTARY INFORMATION

## NMR Spectra

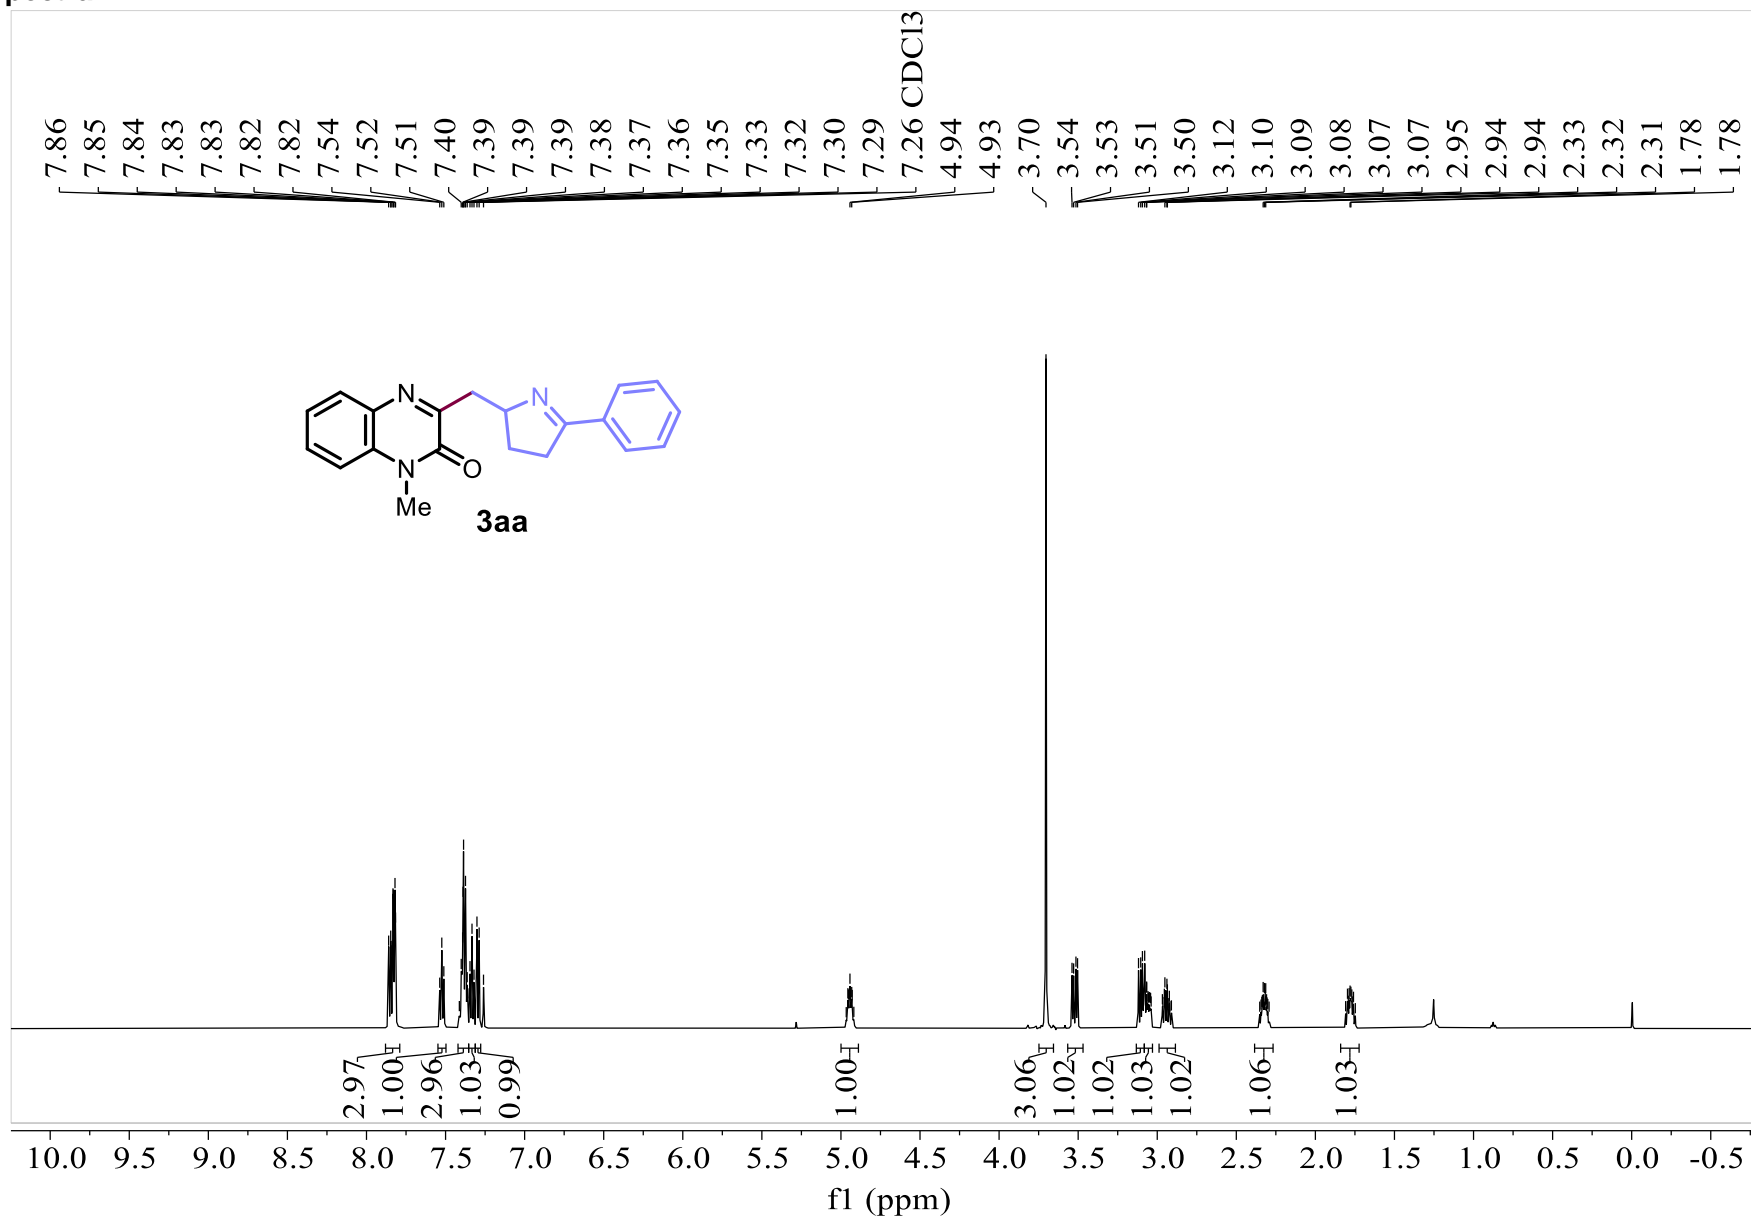

SUPPLEMENTARY INFORMATION

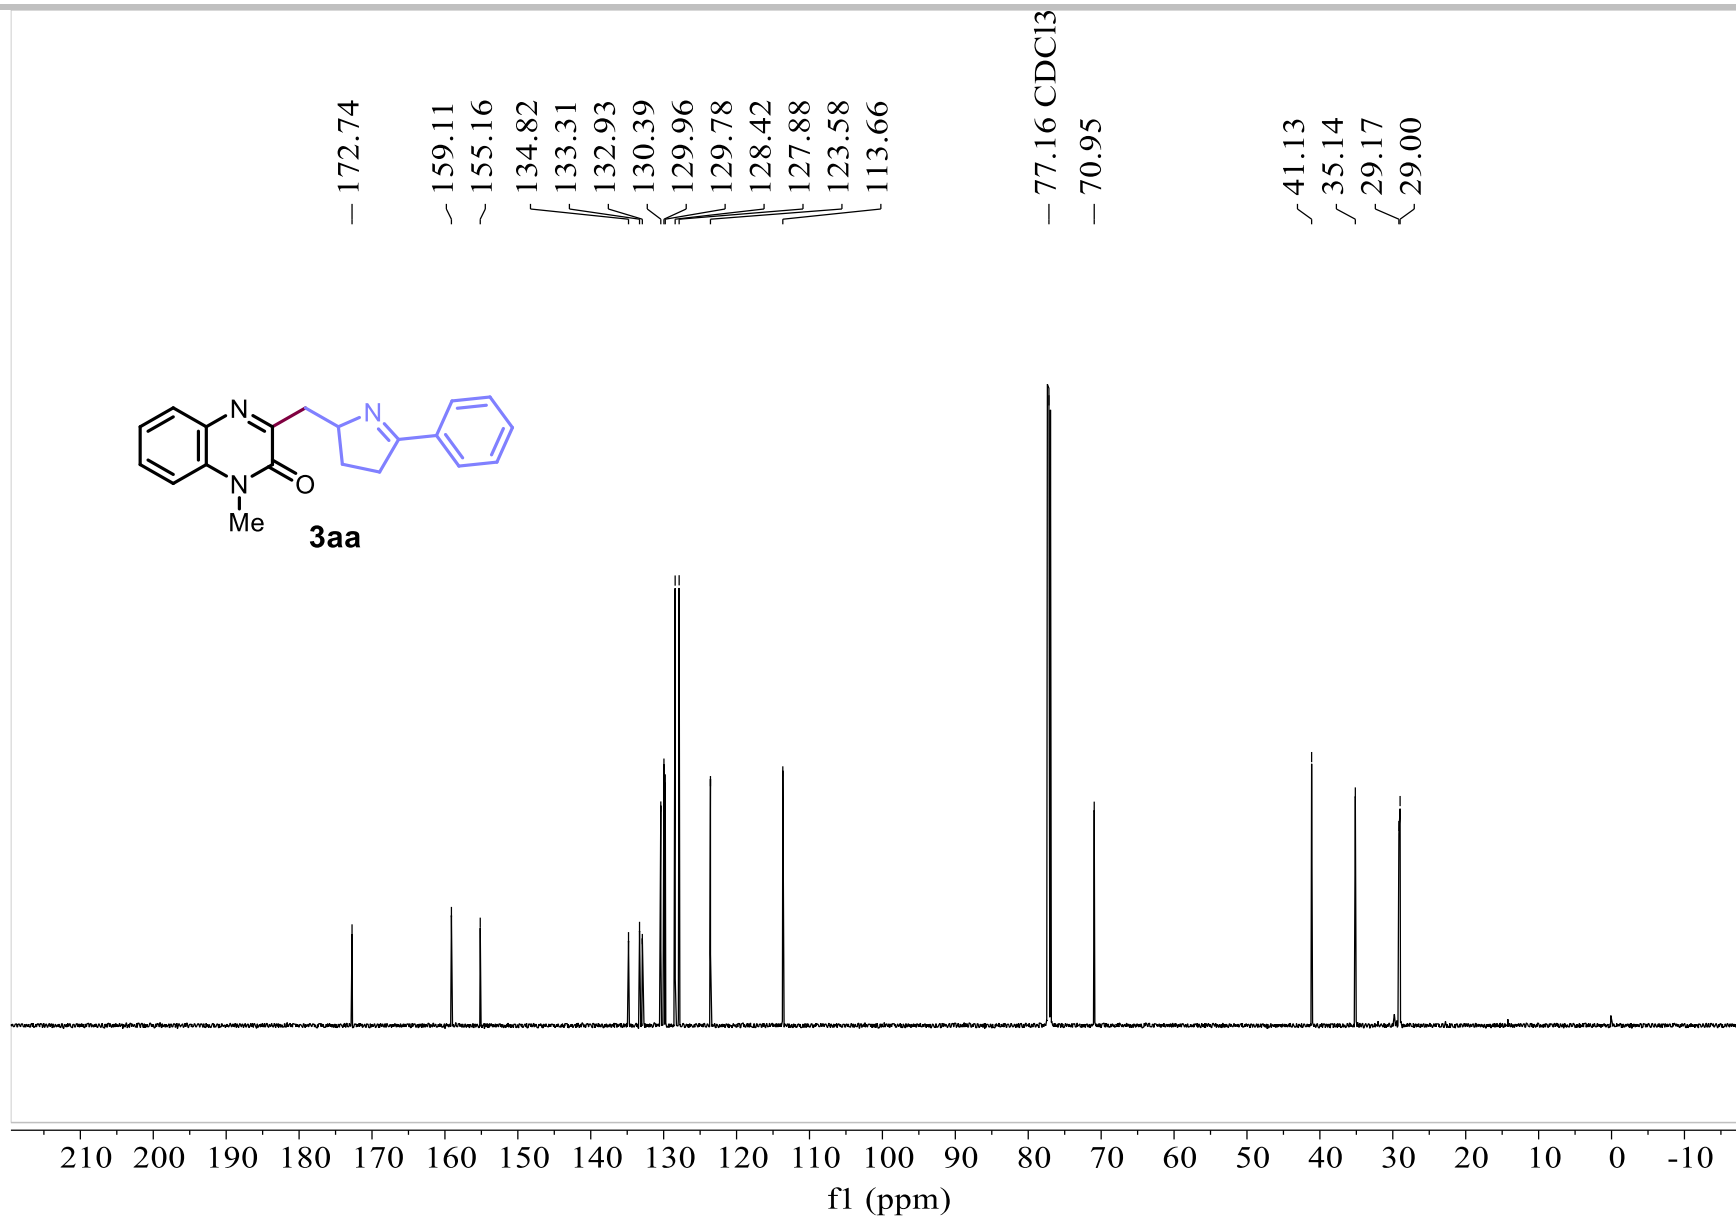

SUPPLEMENTARY INFORMATION

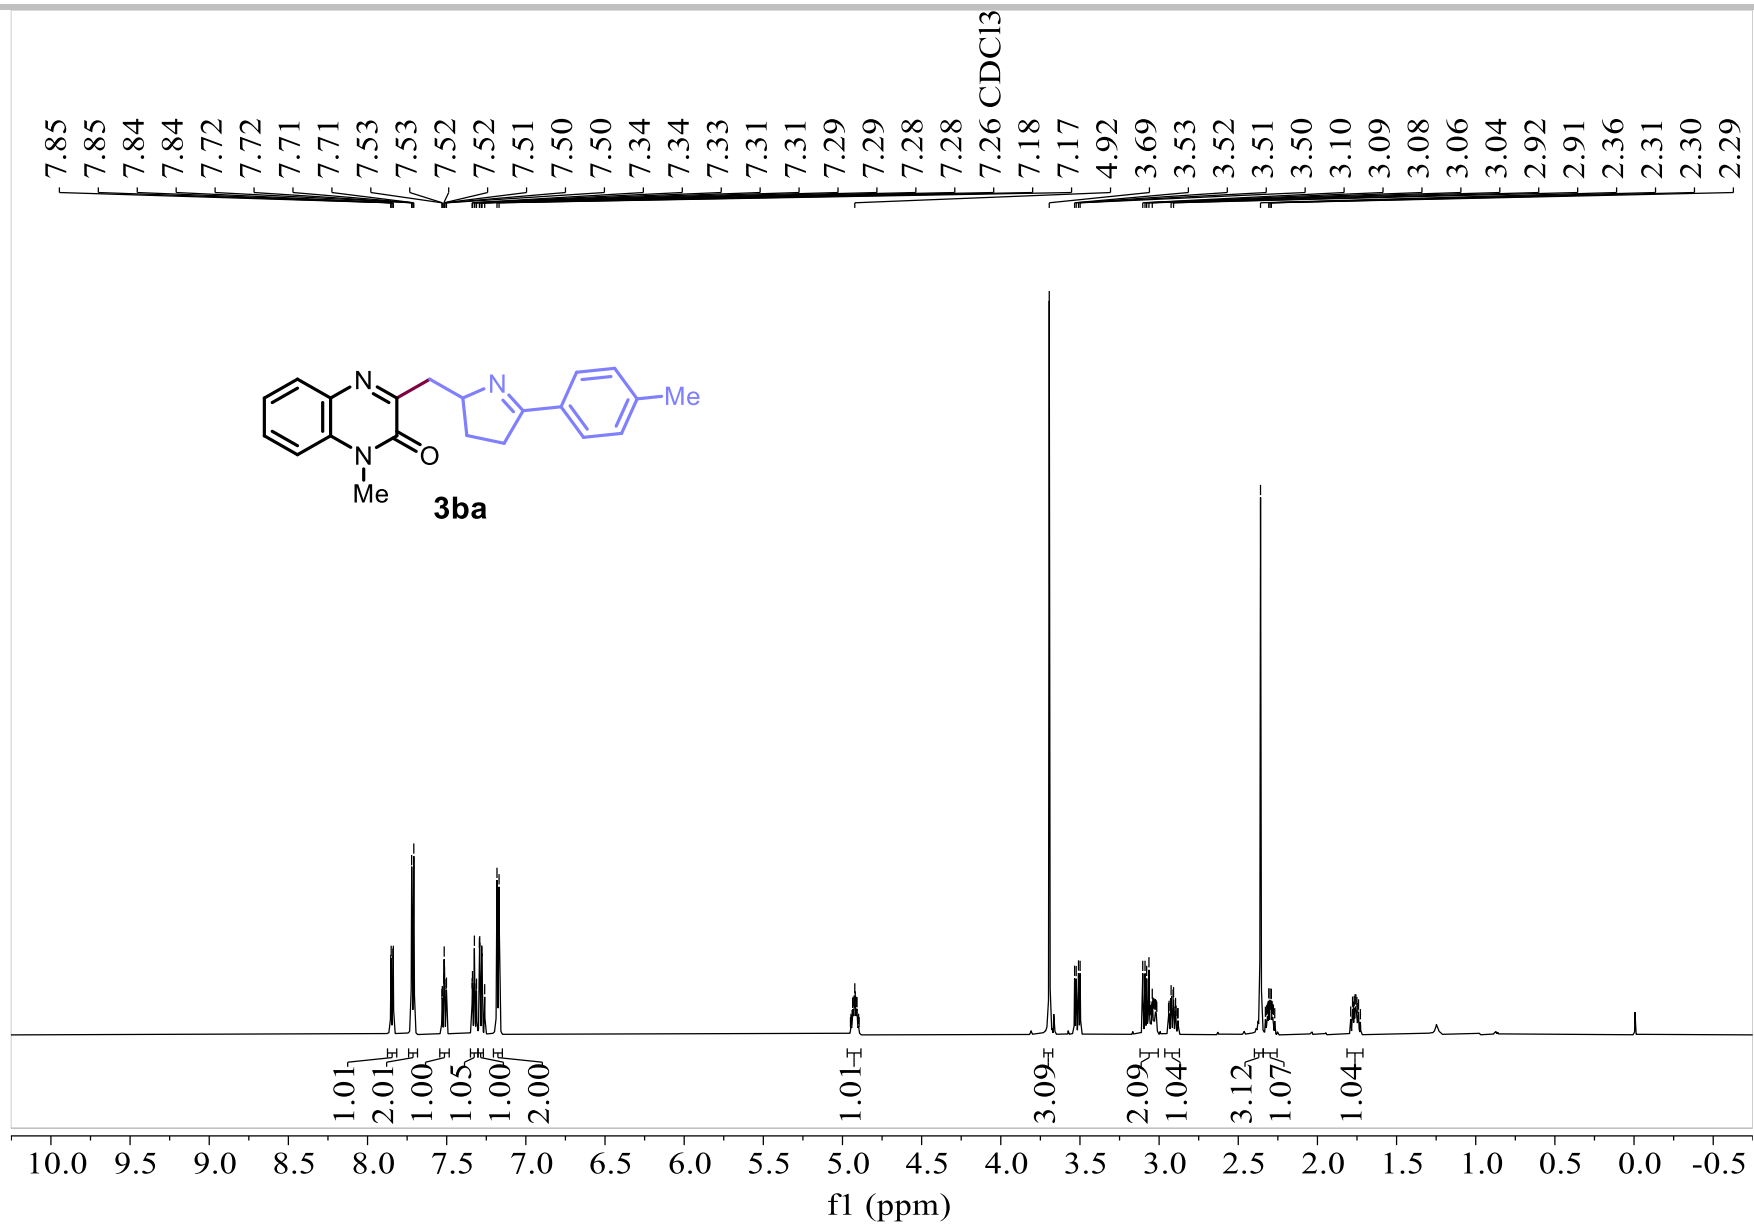



SUPPLEMENTARY INFORMATION

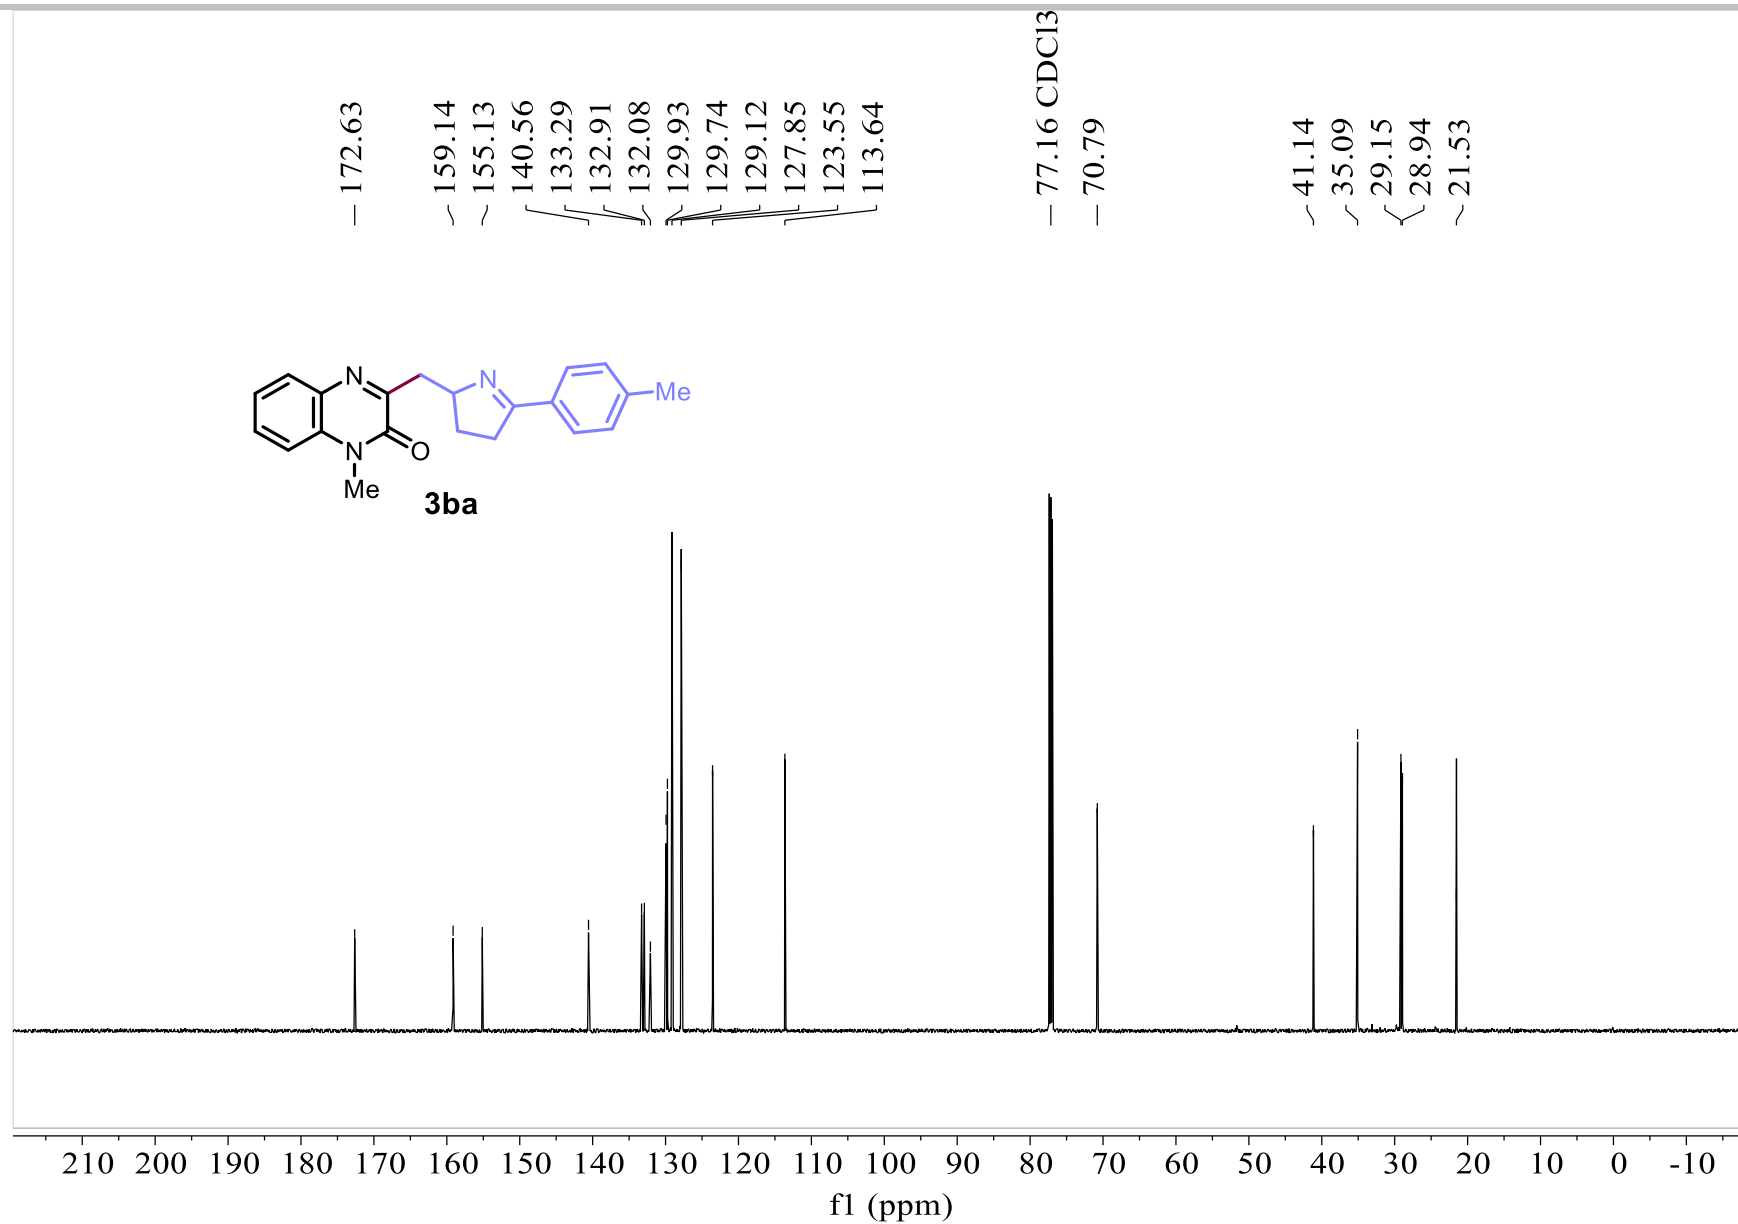

SUPPLEMENTARY INFORMATION

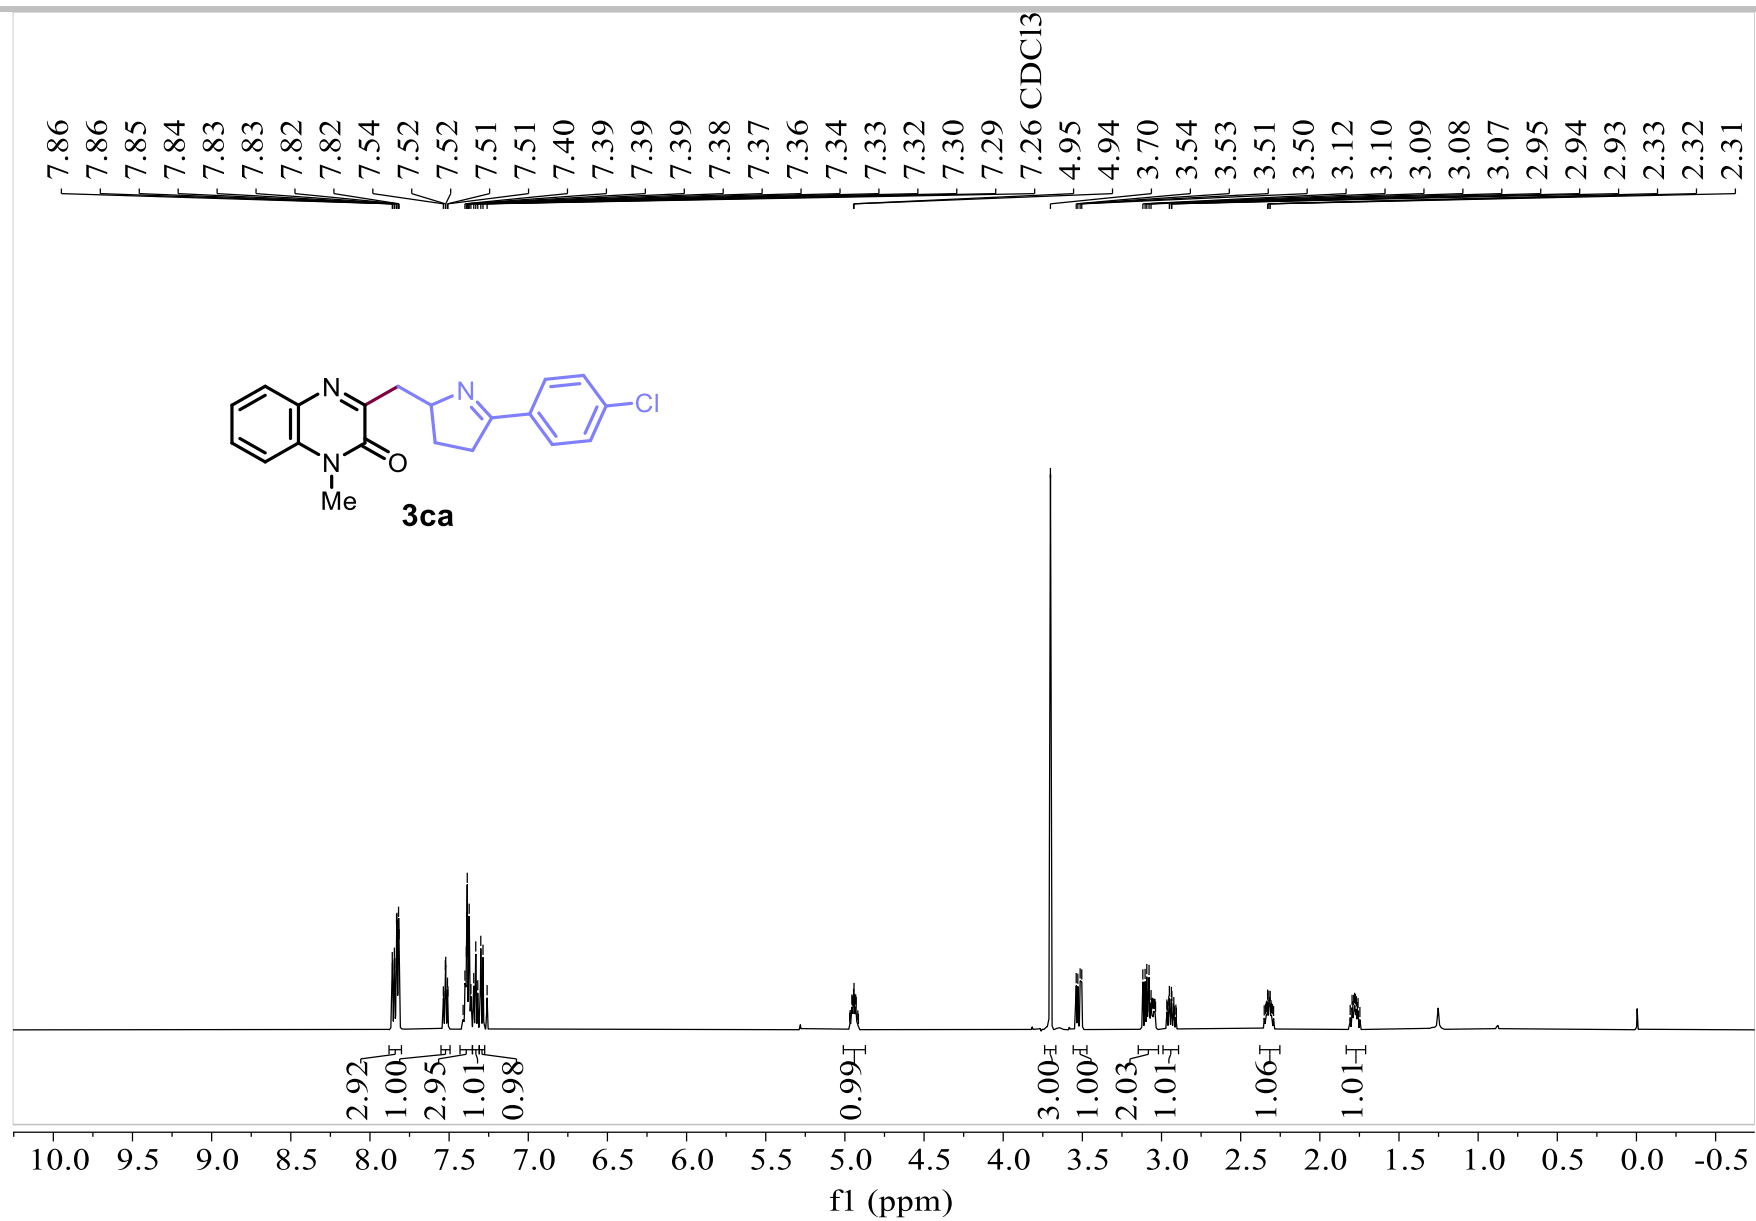

SUPPLEMENTARY INFORMATION

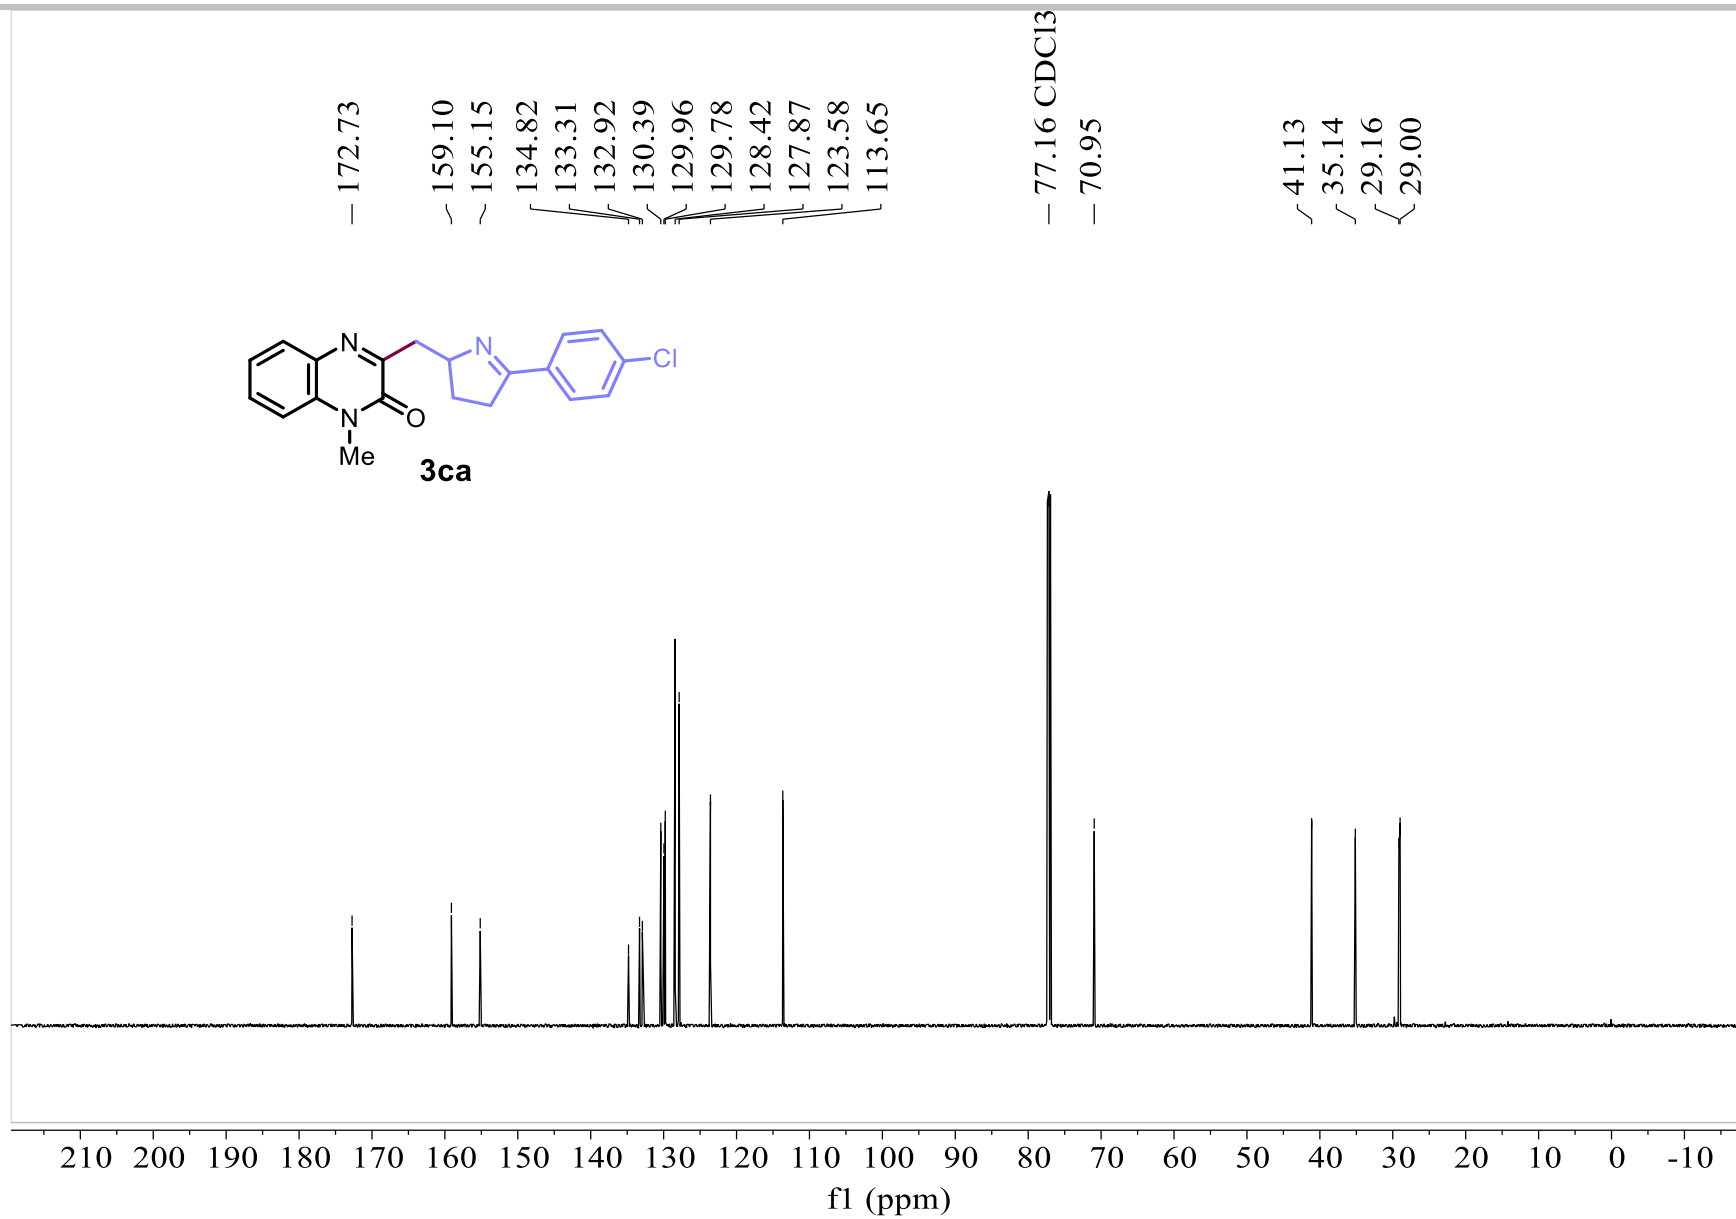

SUPPLEMENTARY INFORMATION

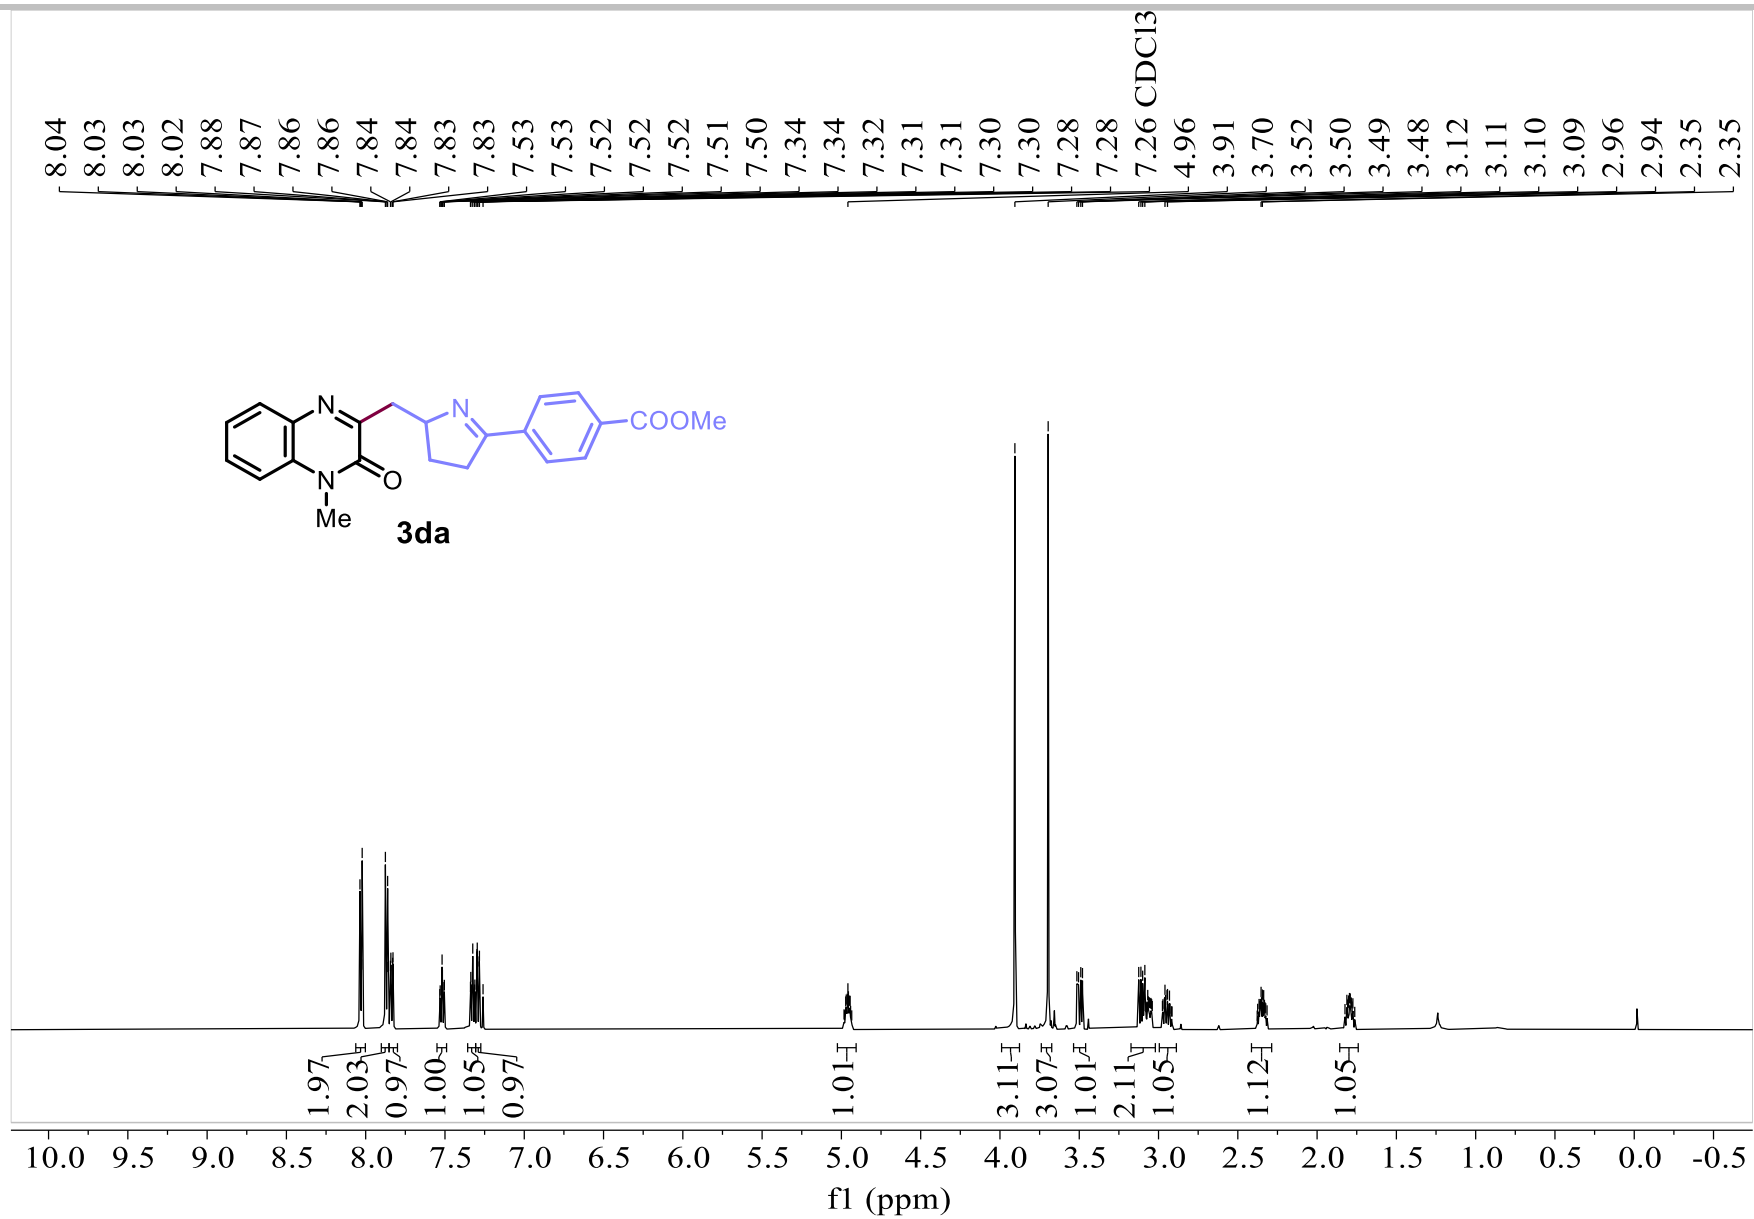

SUPPLEMENTARY INFORMATION

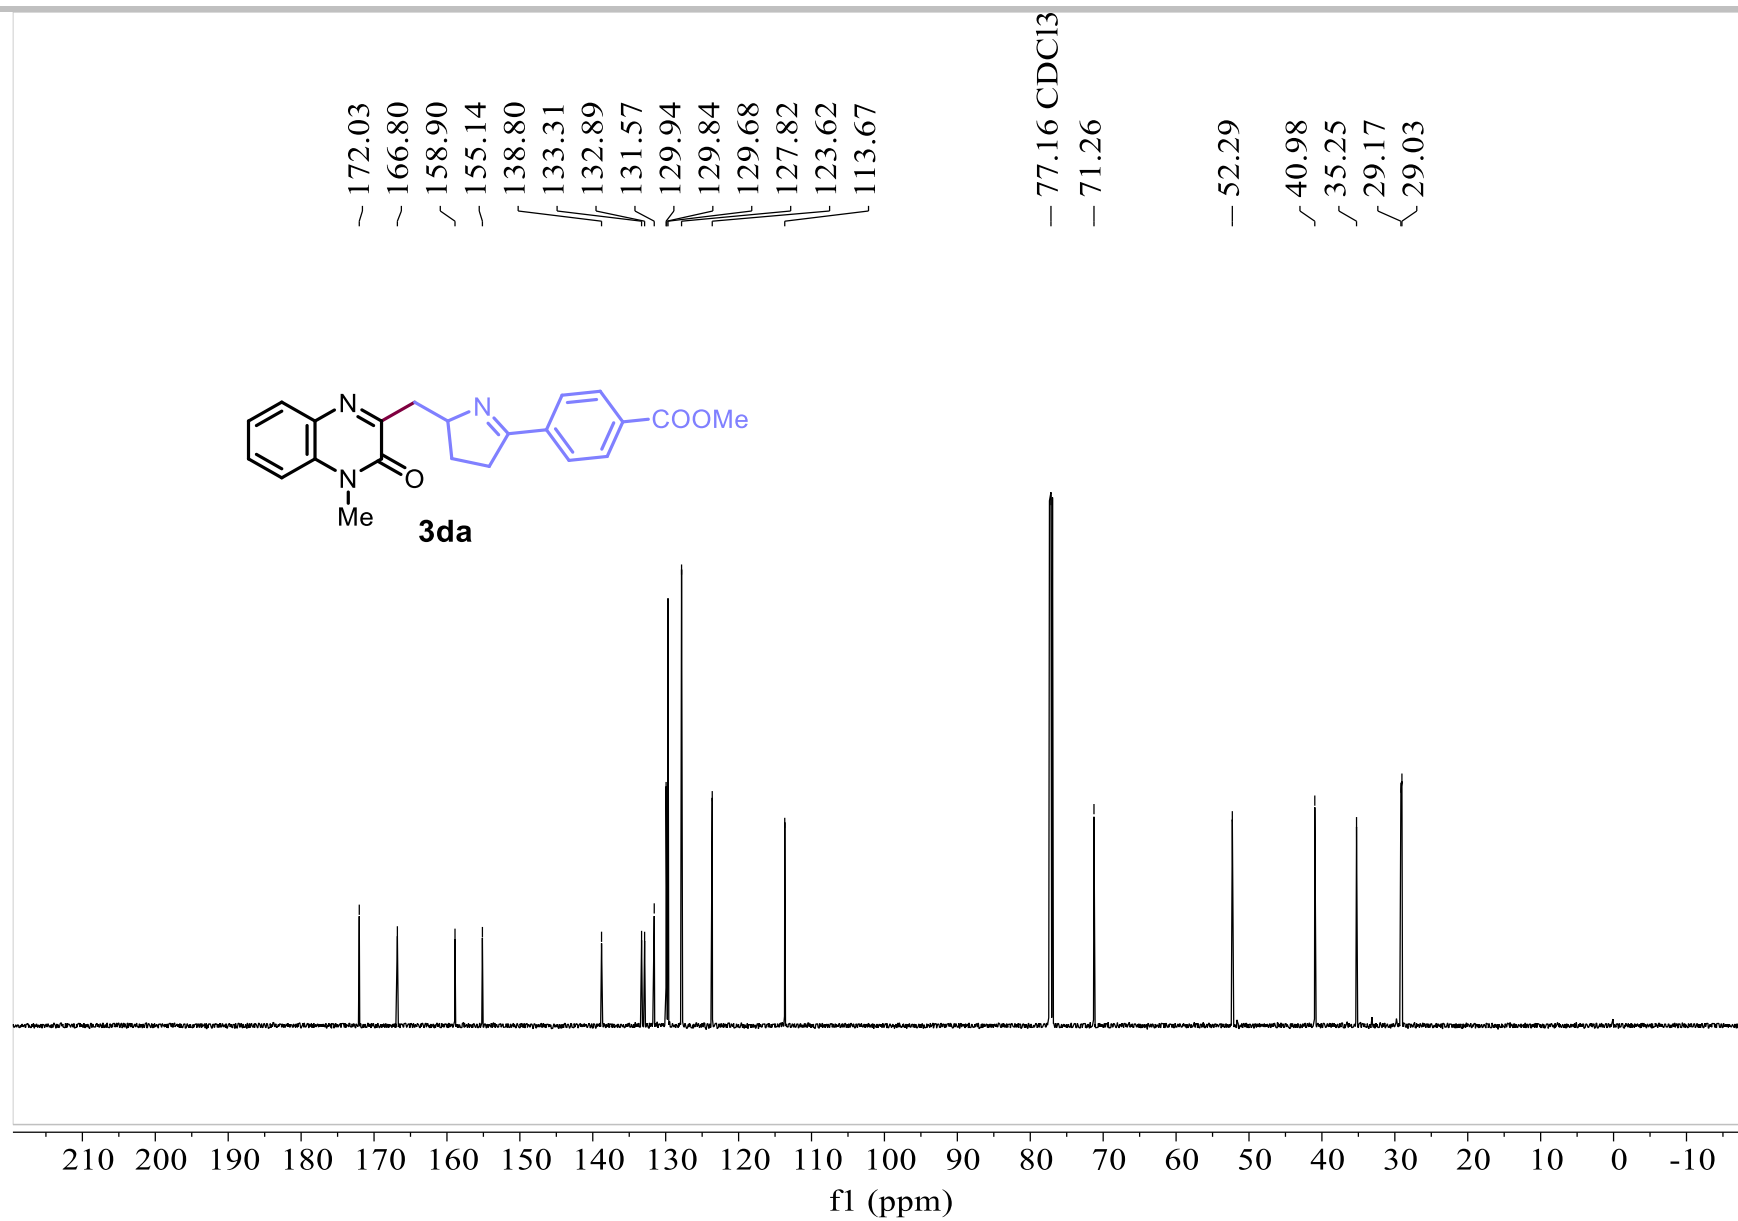

SUPPLEMENTARY INFORMATION

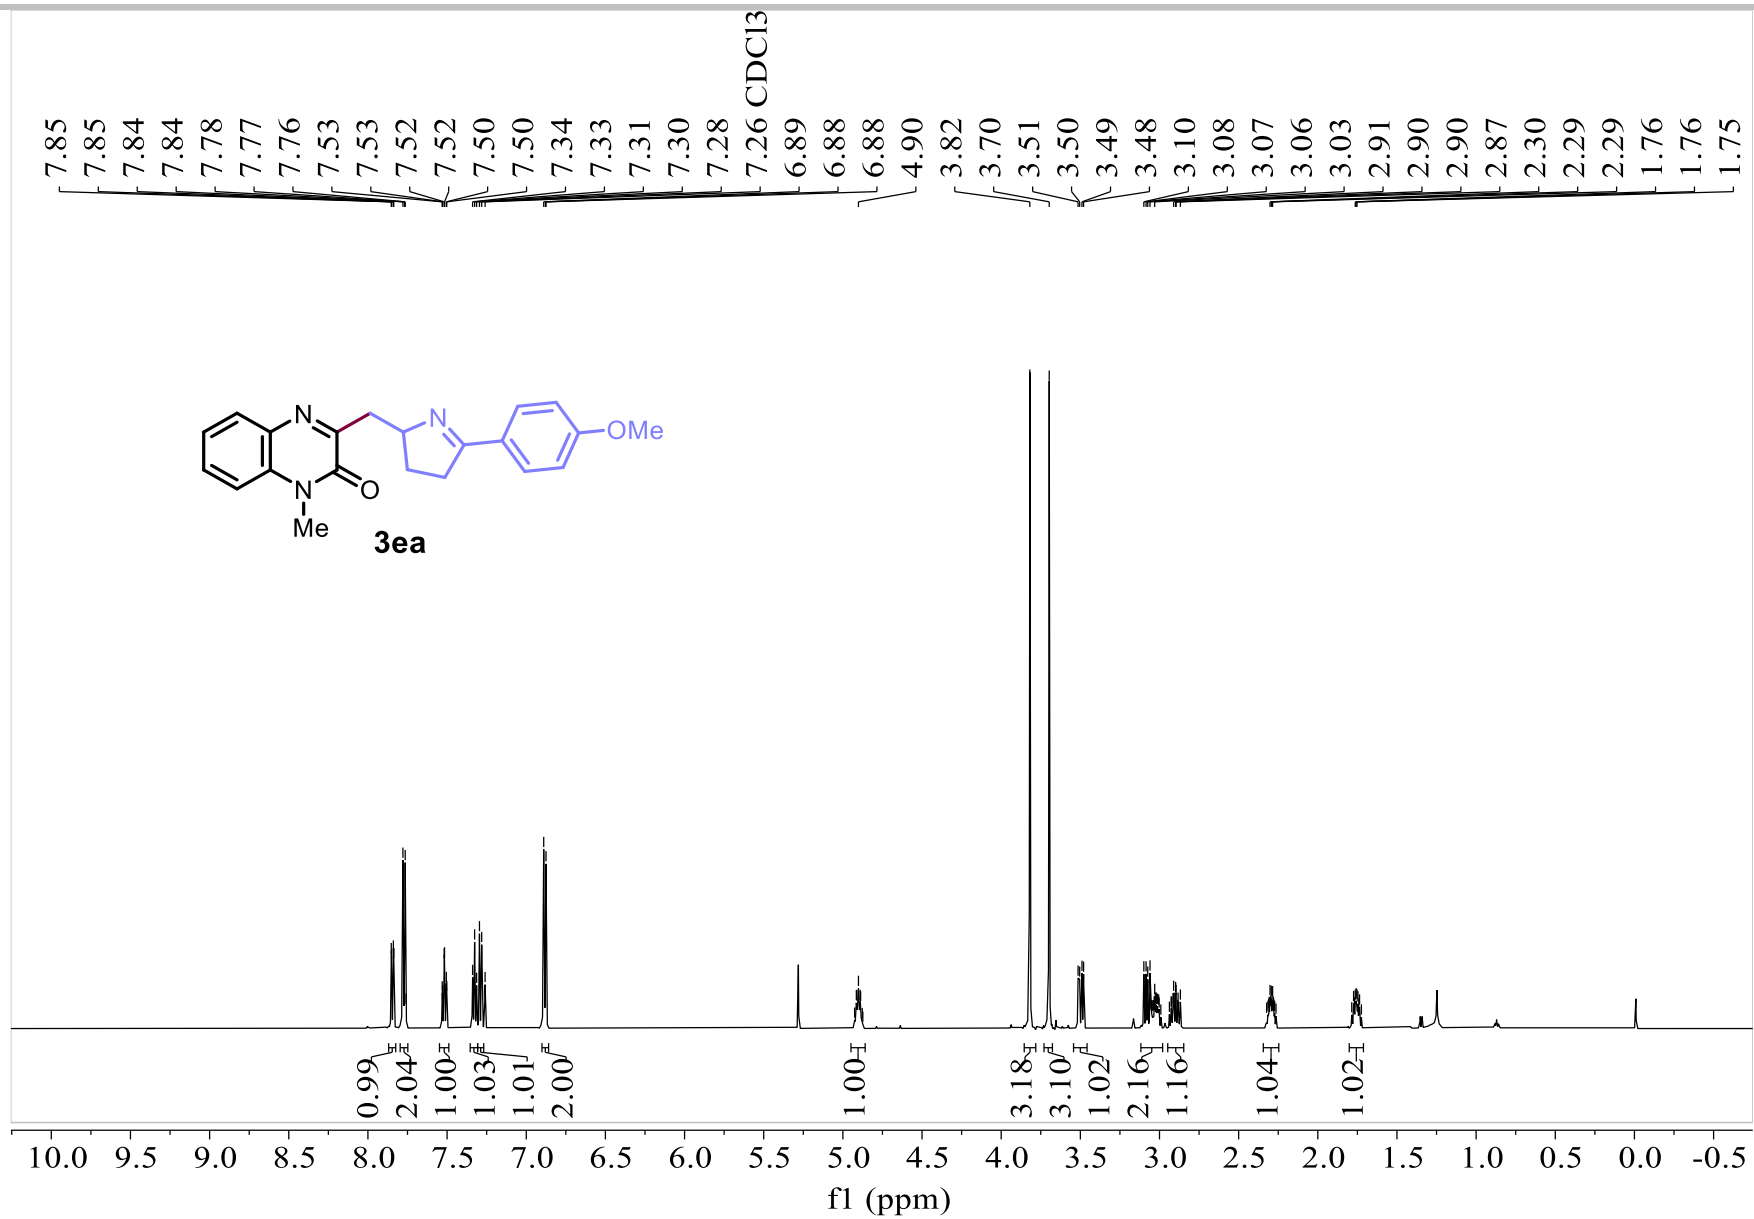

SUPPLEMENTARY INFORMATION

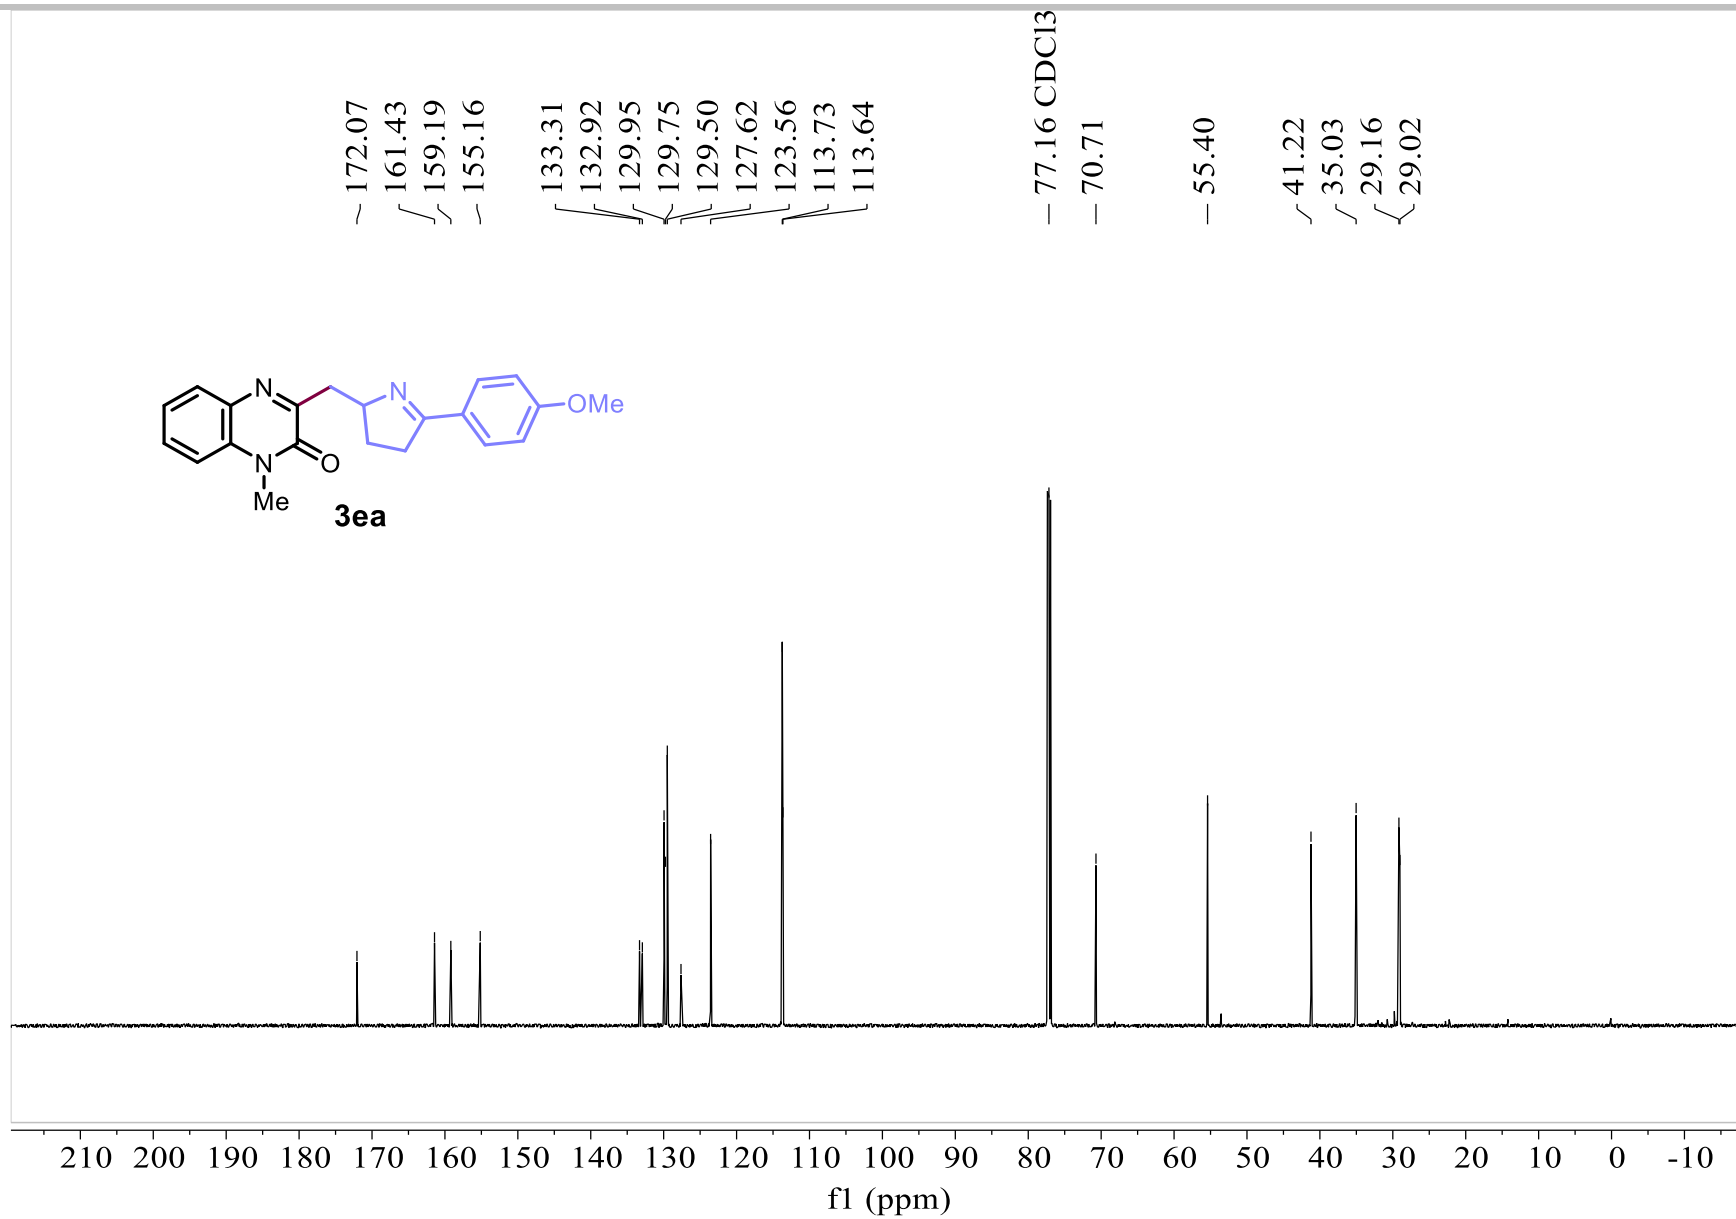

SUPPLEMENTARY INFORMATION

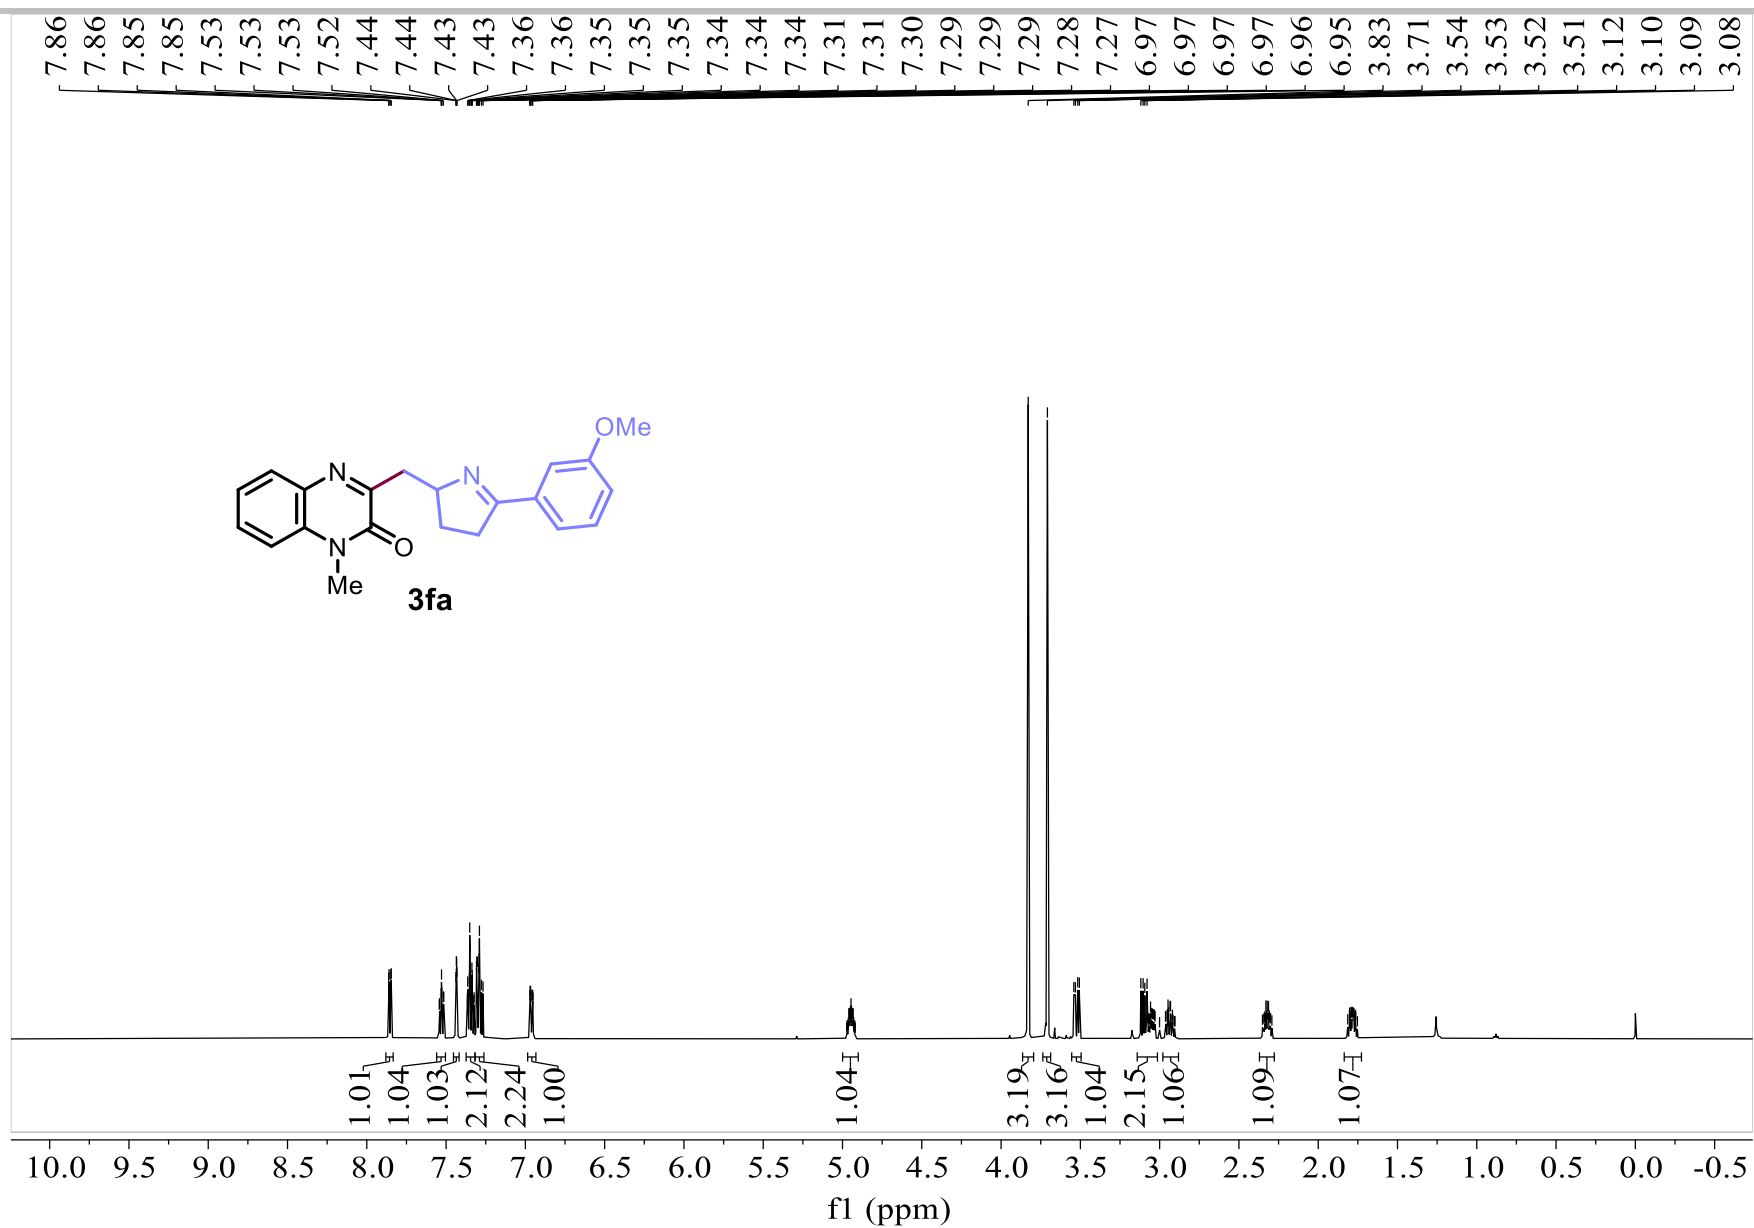



SUPPLEMENTARY INFORMATION

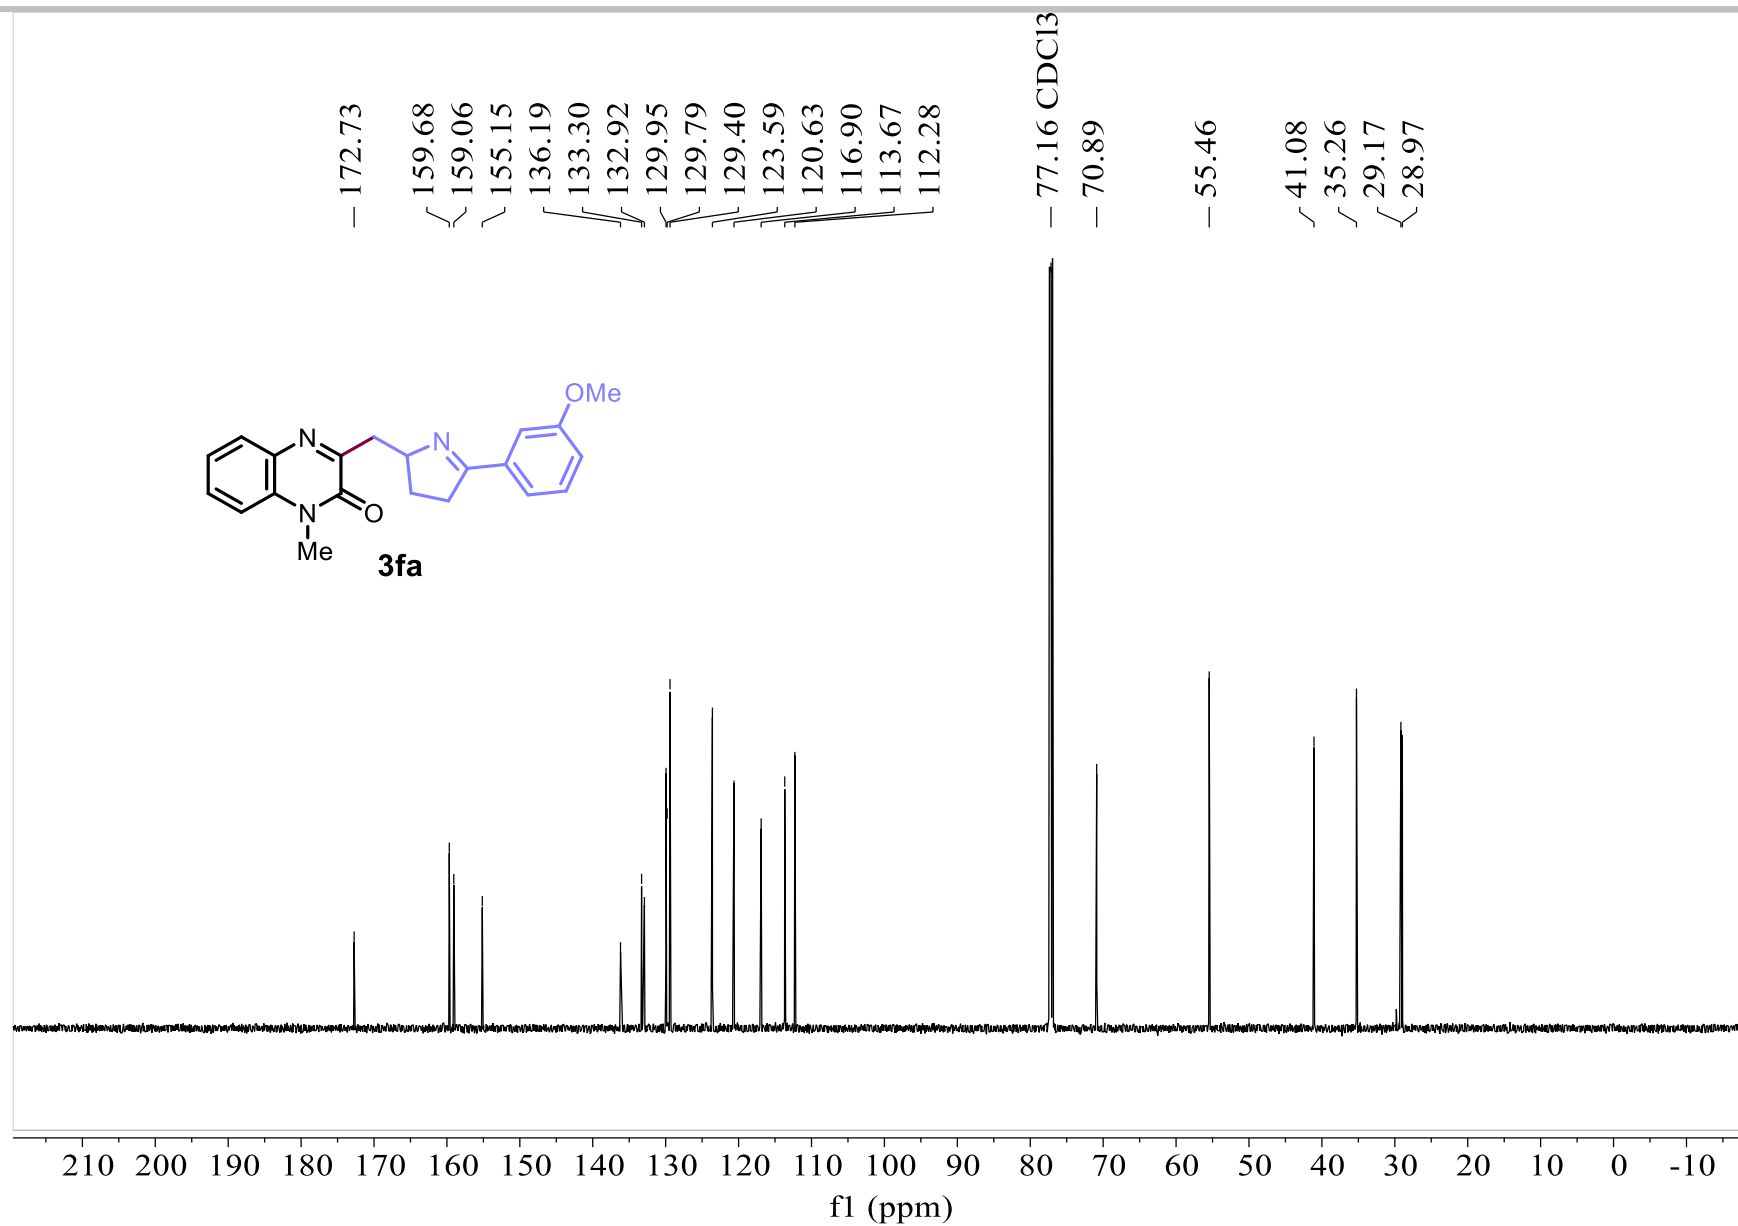

SUPPLEMENTARY INFORMATION

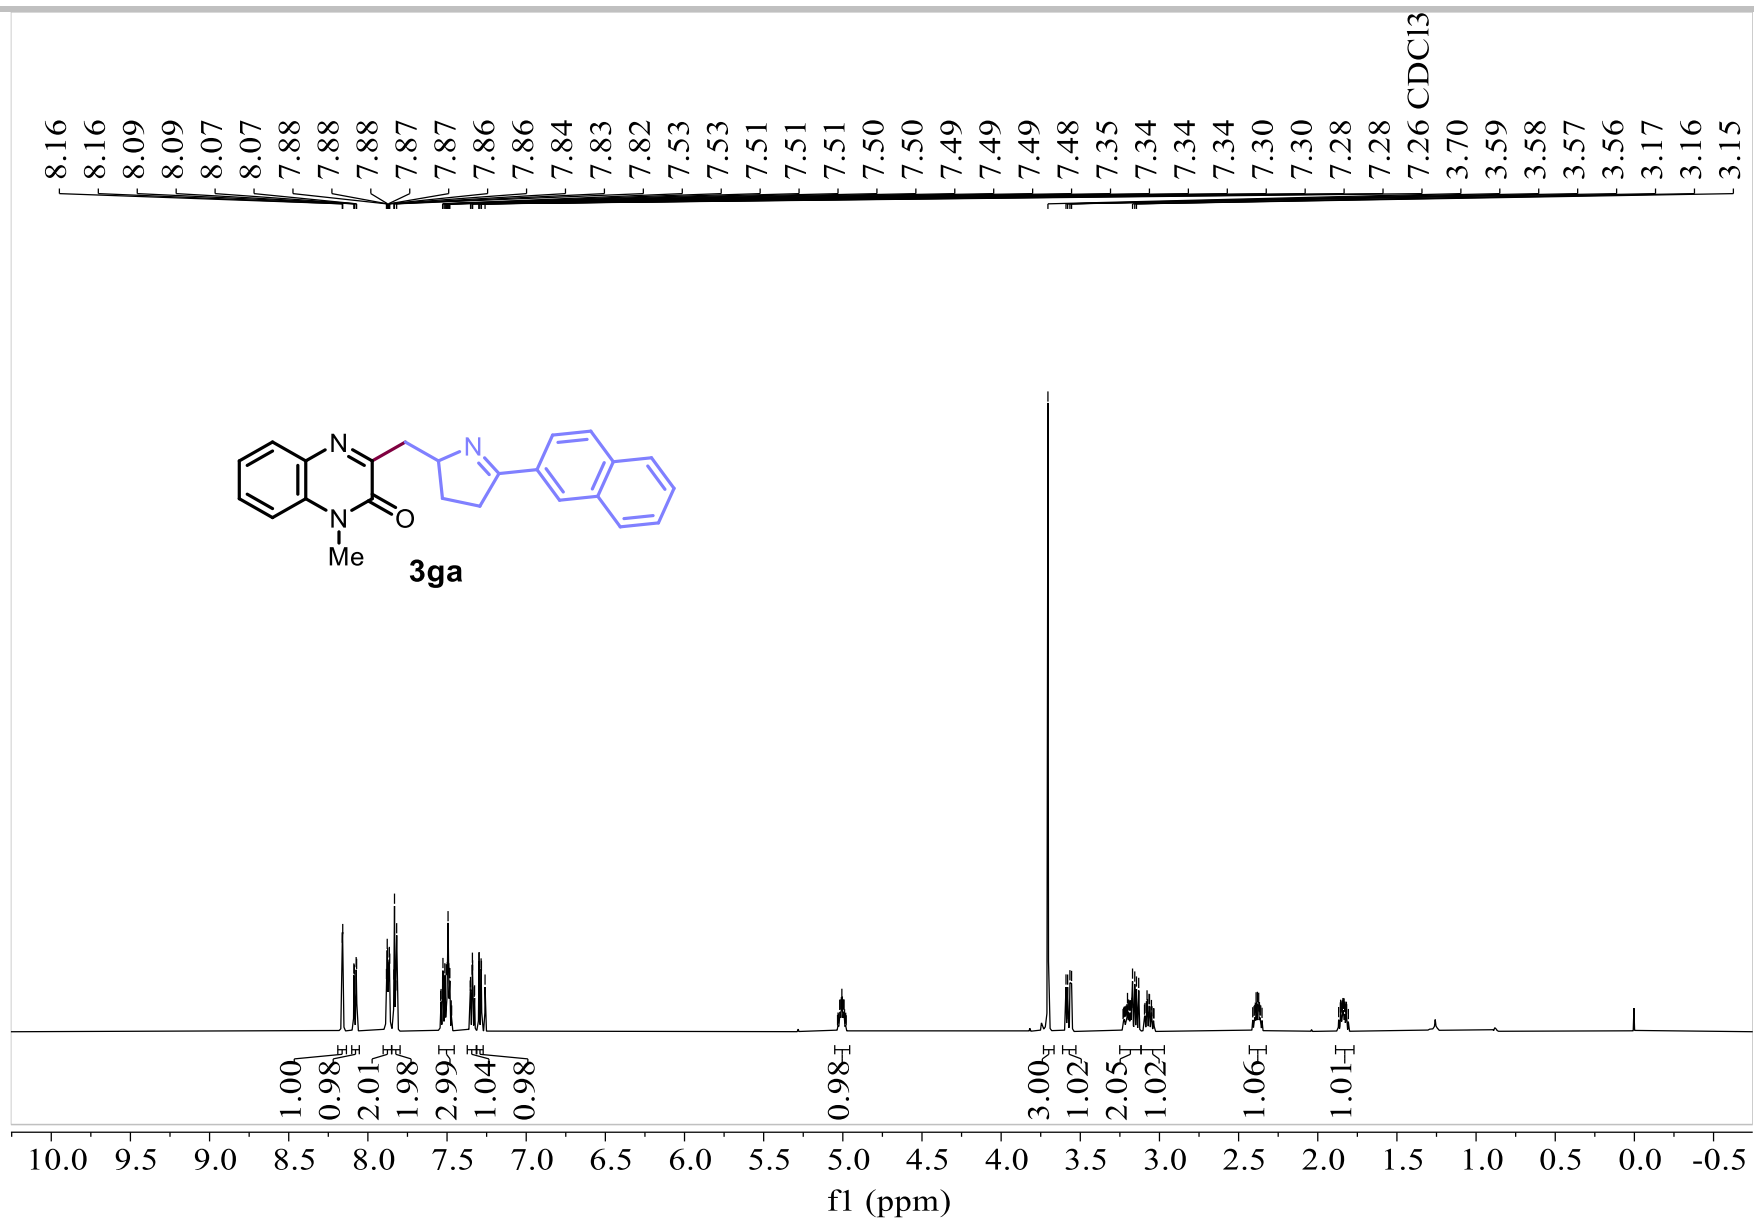

SUPPLEMENTARY INFORMATION

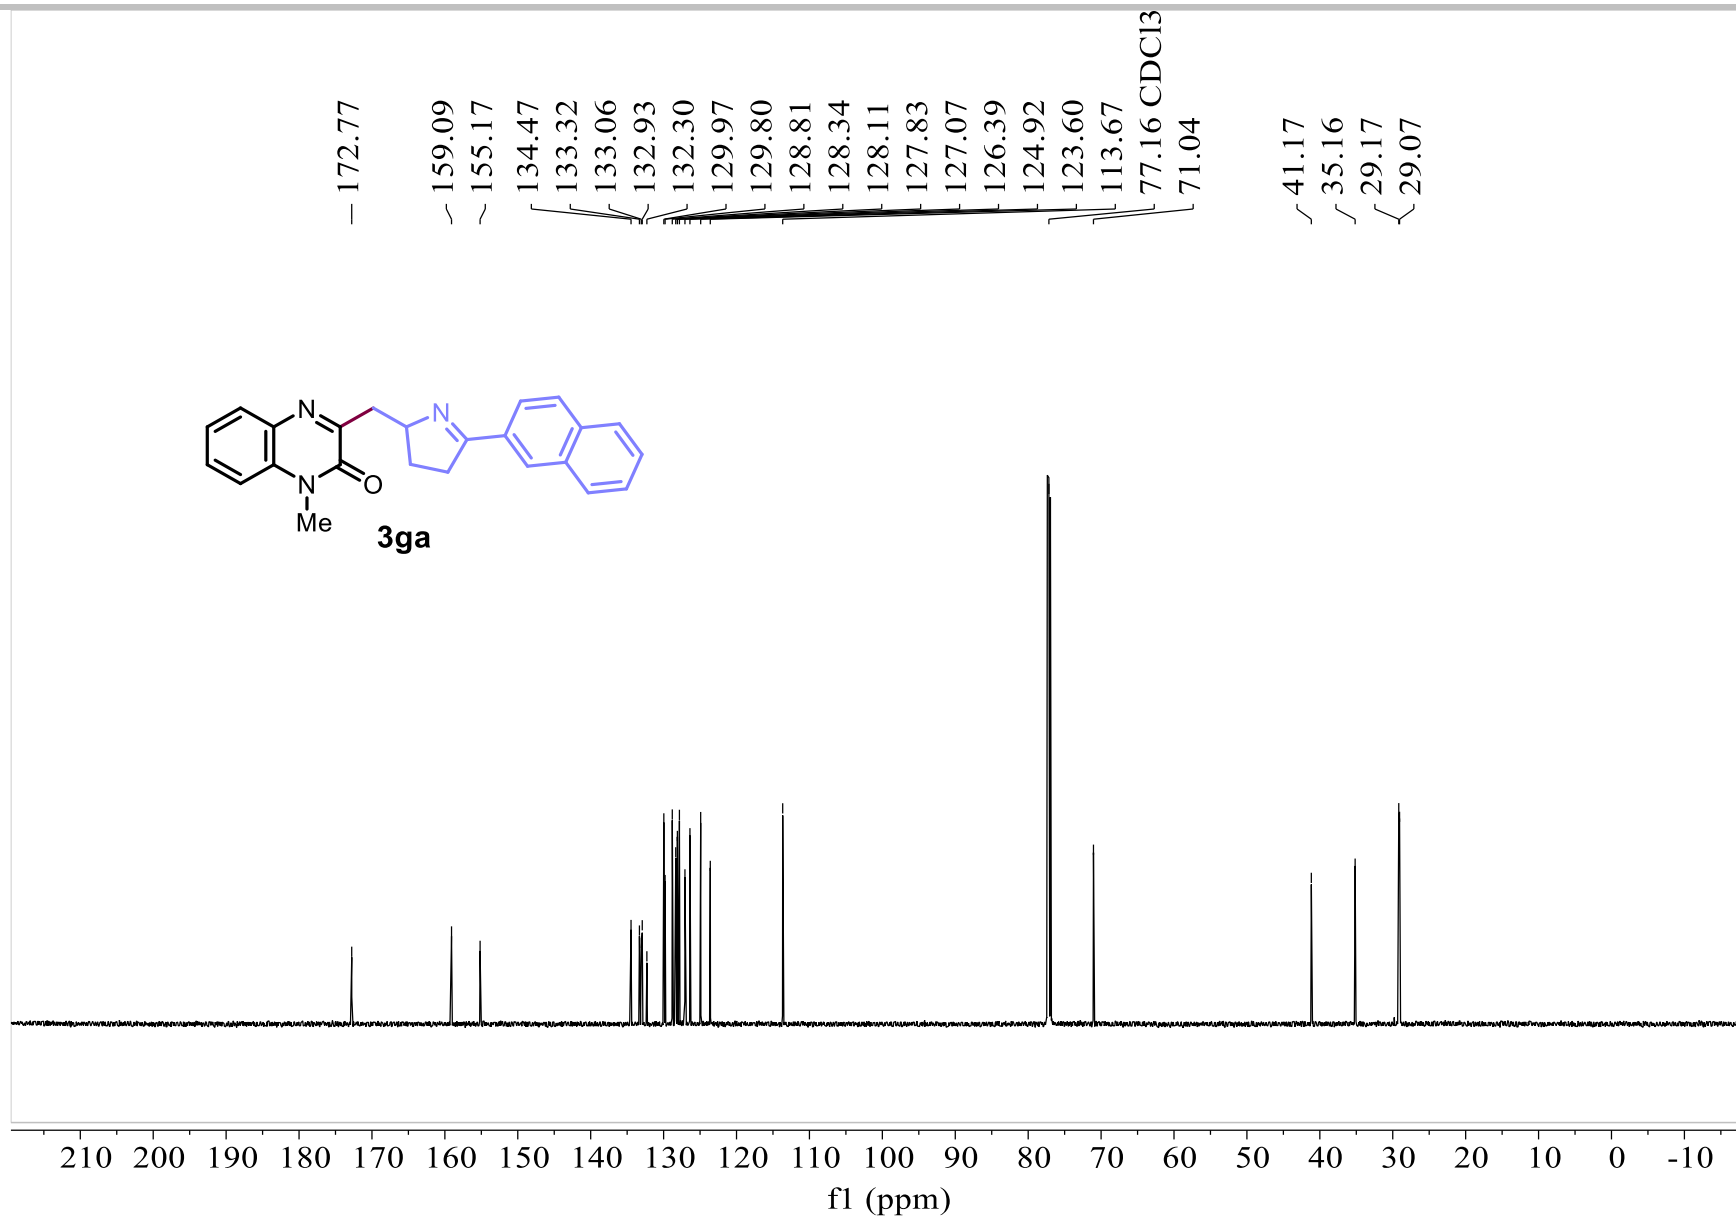

SUPPLEMENTARY INFORMATION

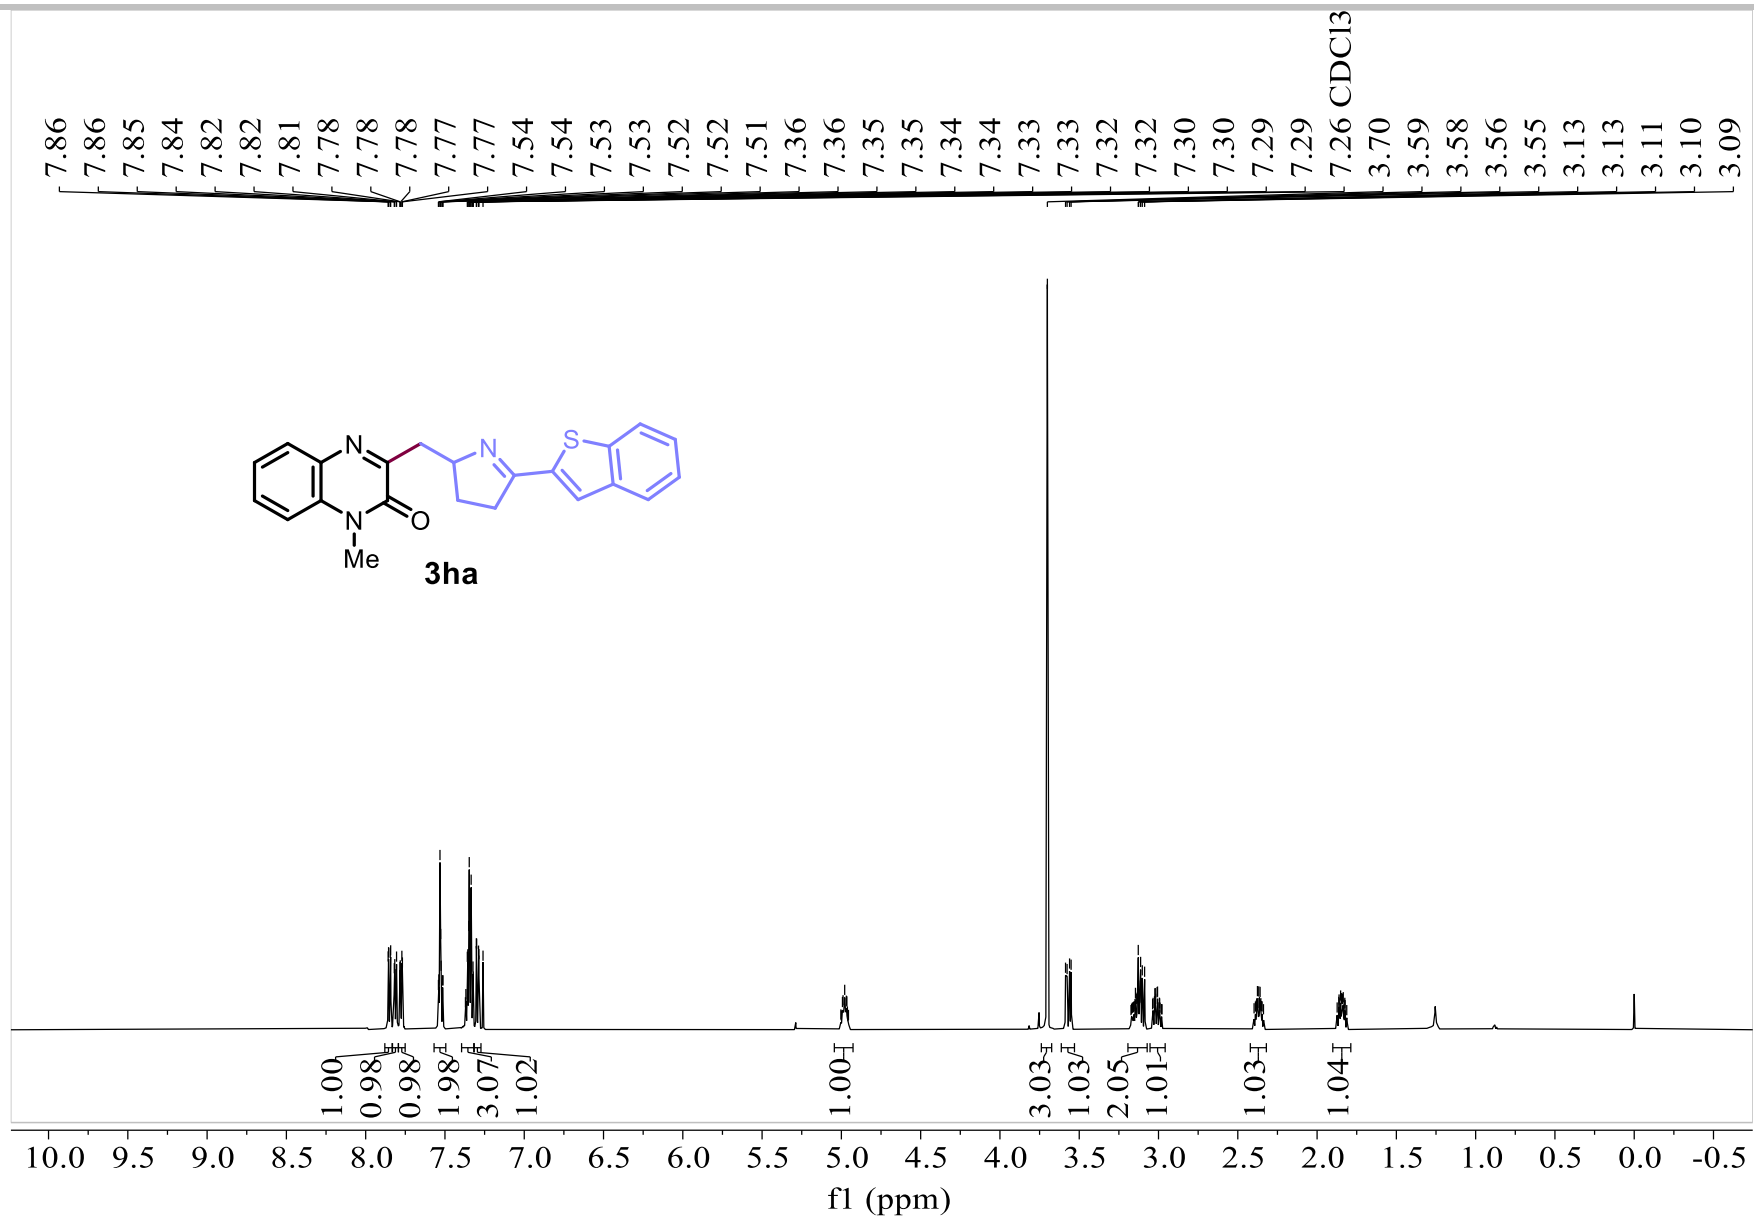

SUPPLEMENTARY INFORMATION

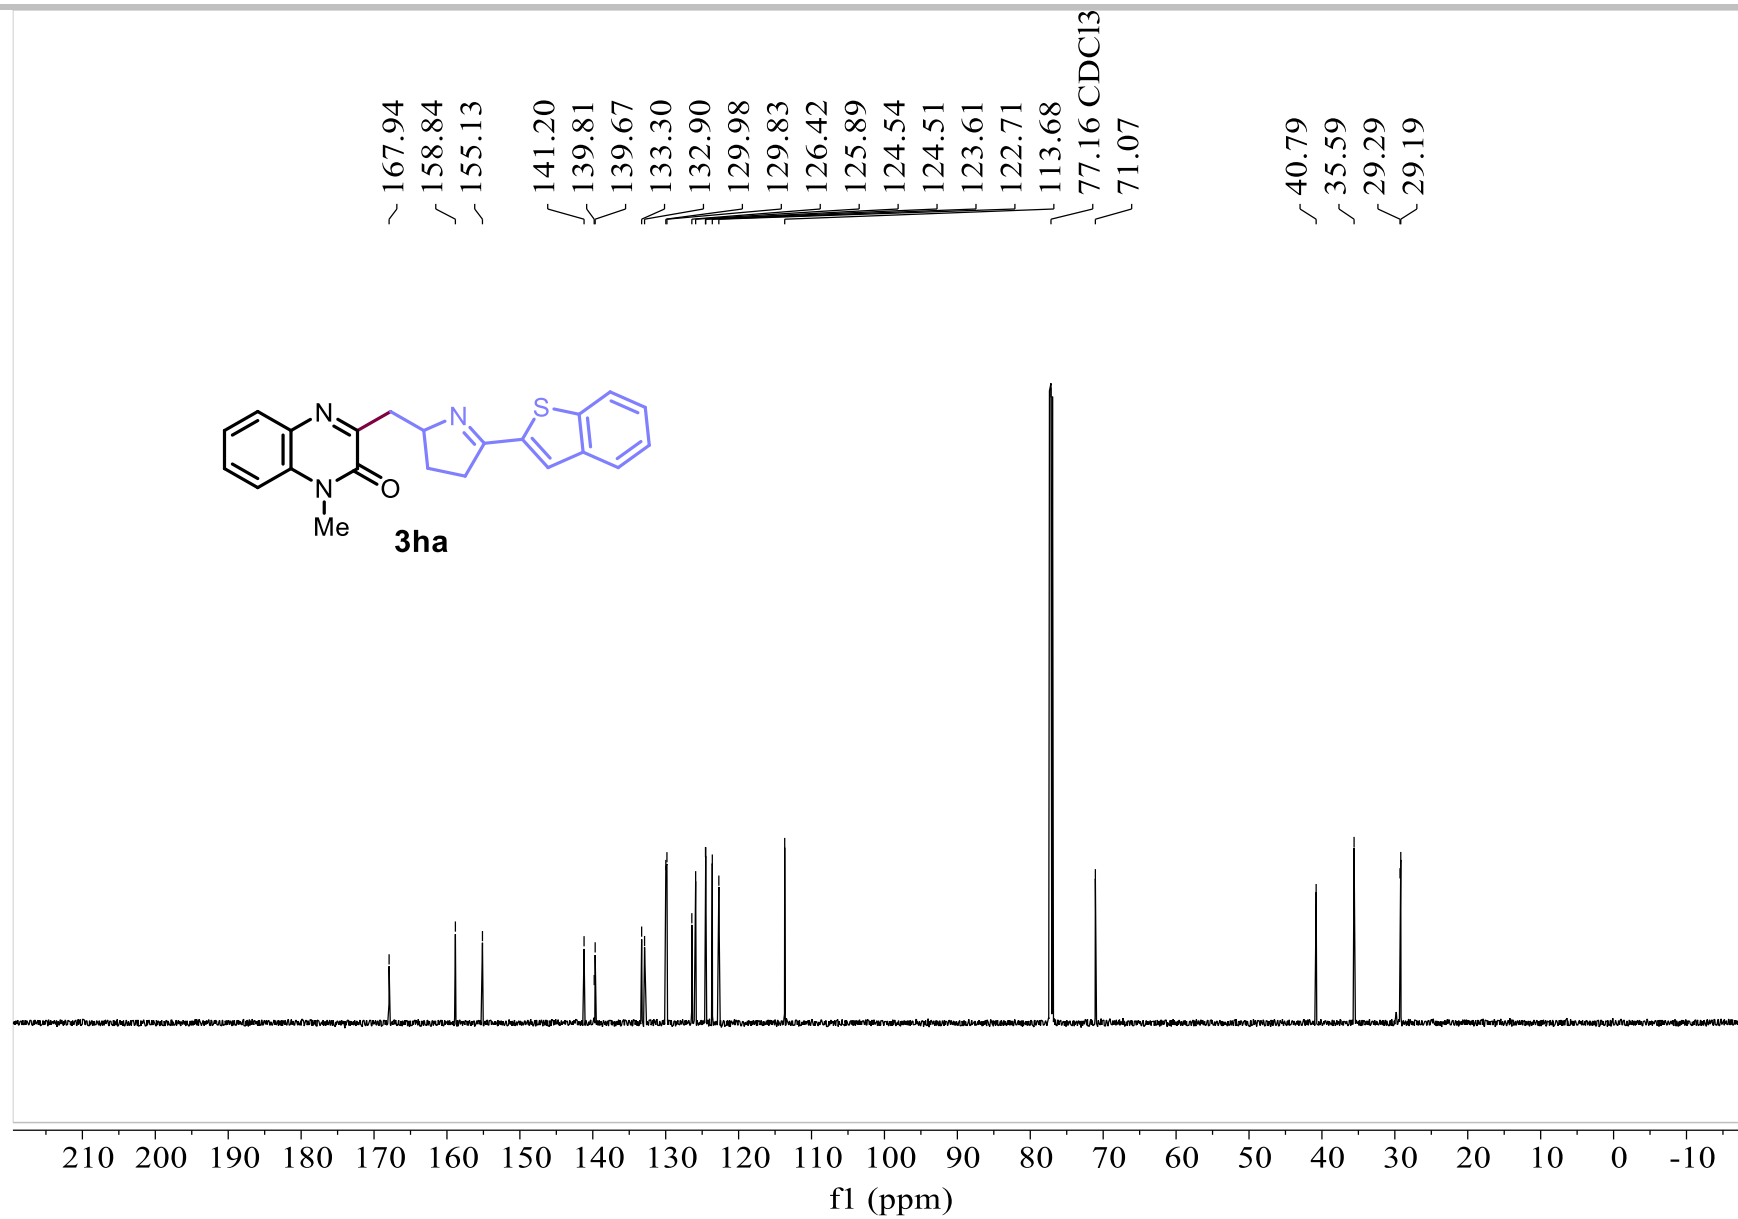

SUPPLEMENTARY INFORMATION

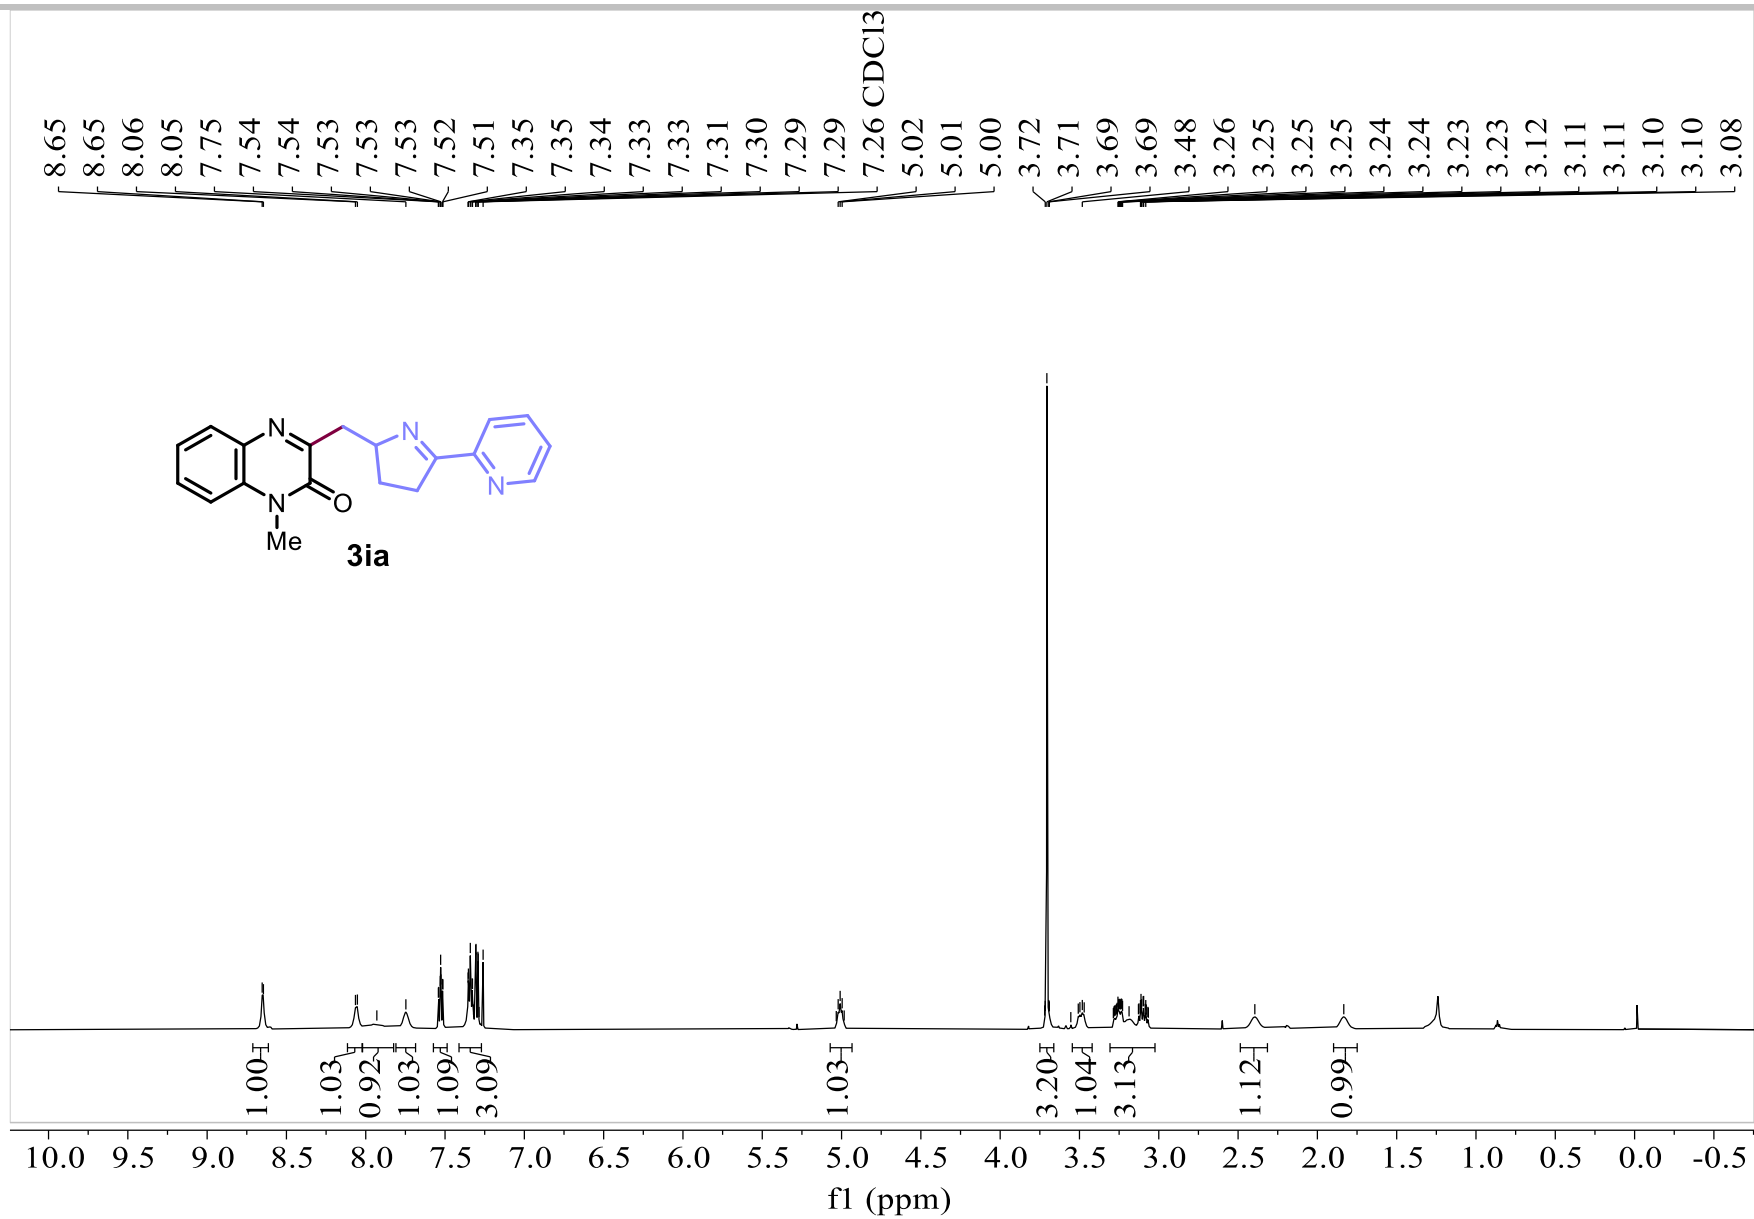

SUPPLEMENTARY INFORMATION

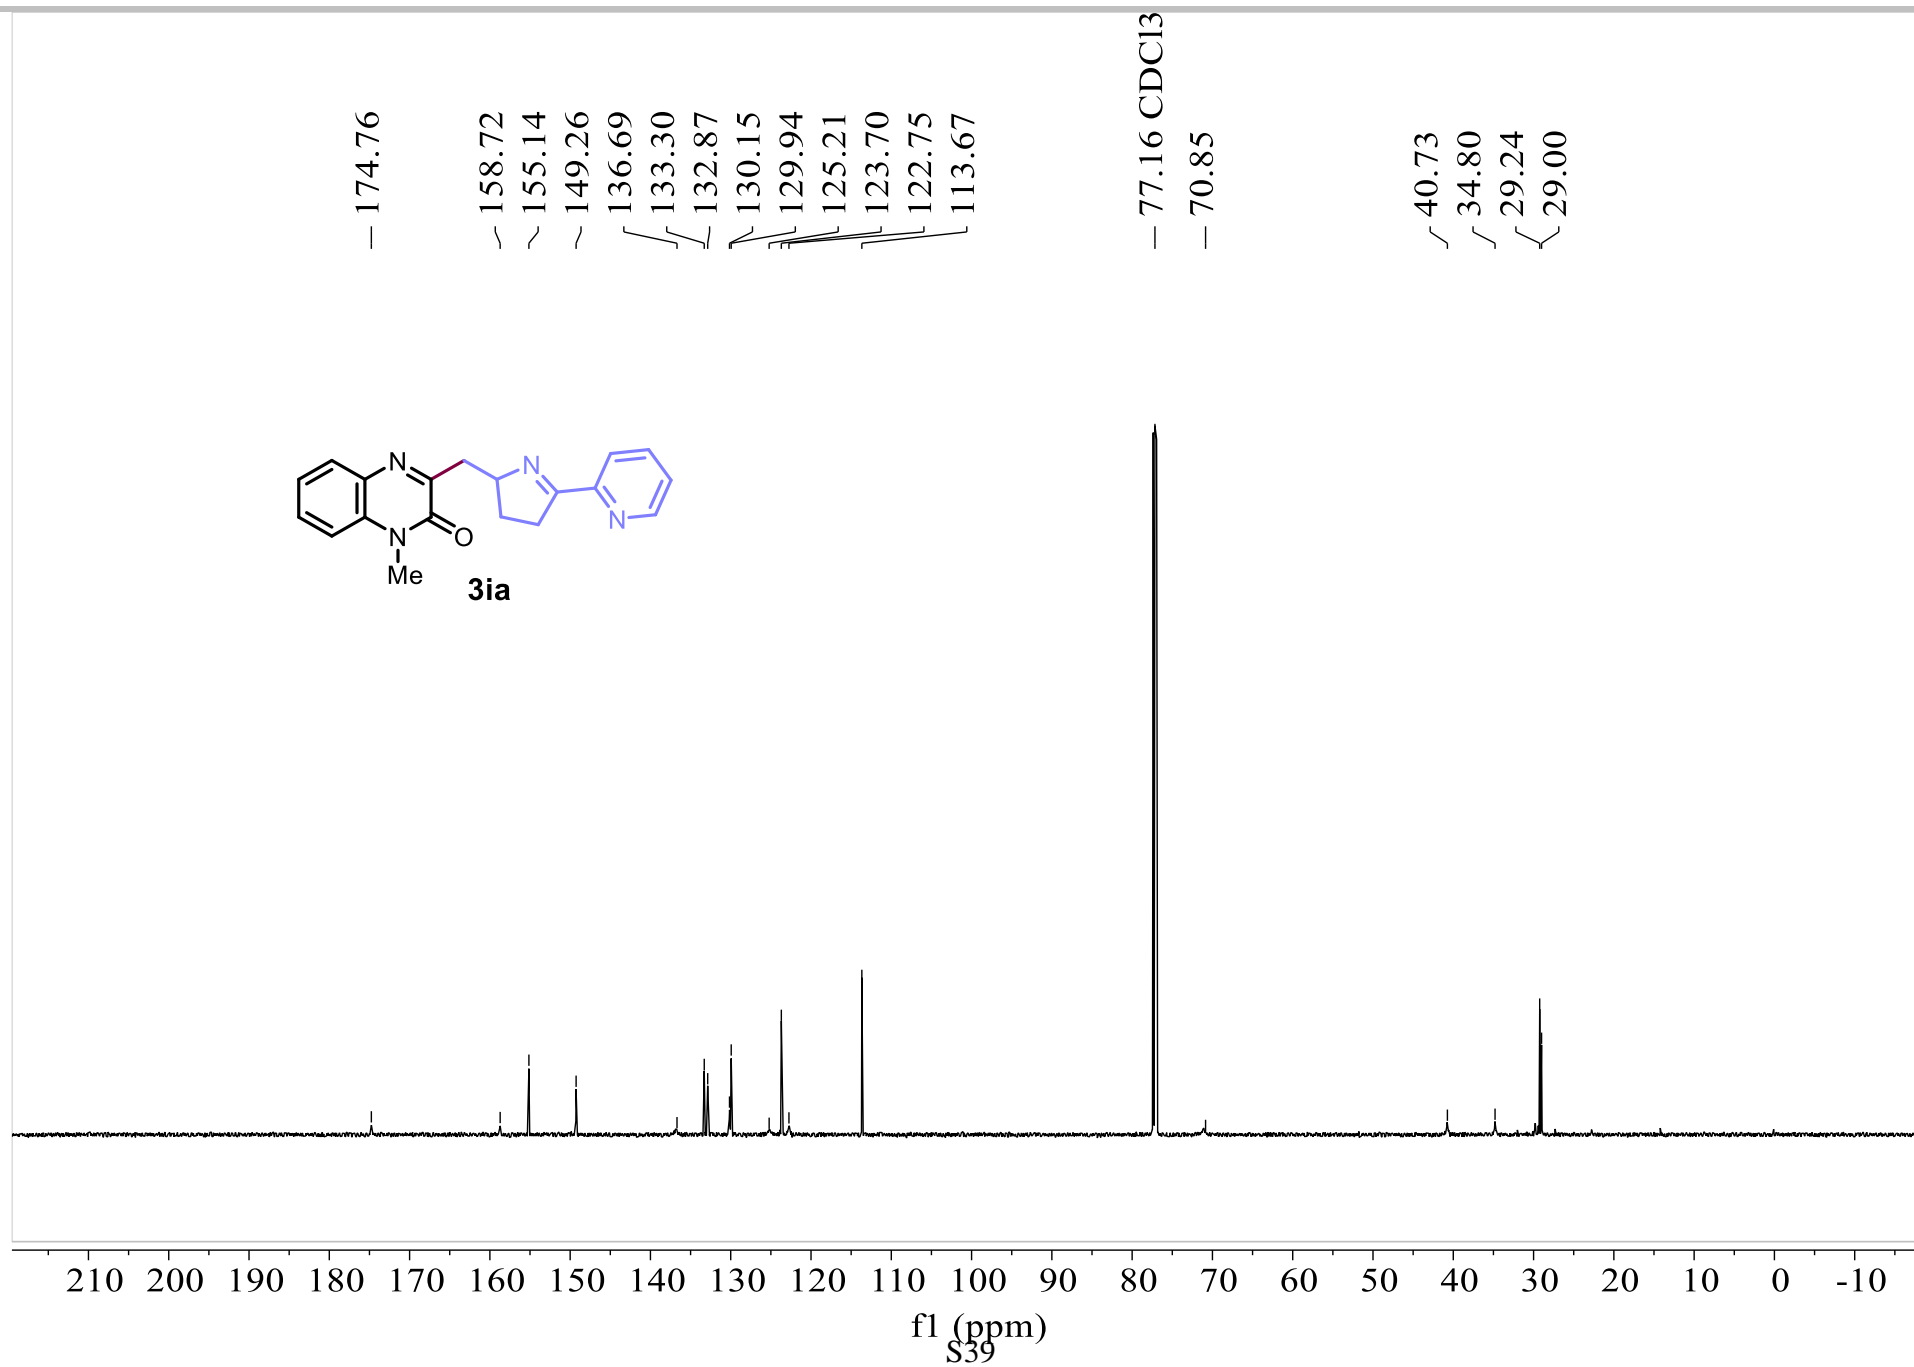

SUPPLEMENTARY INFORMATION

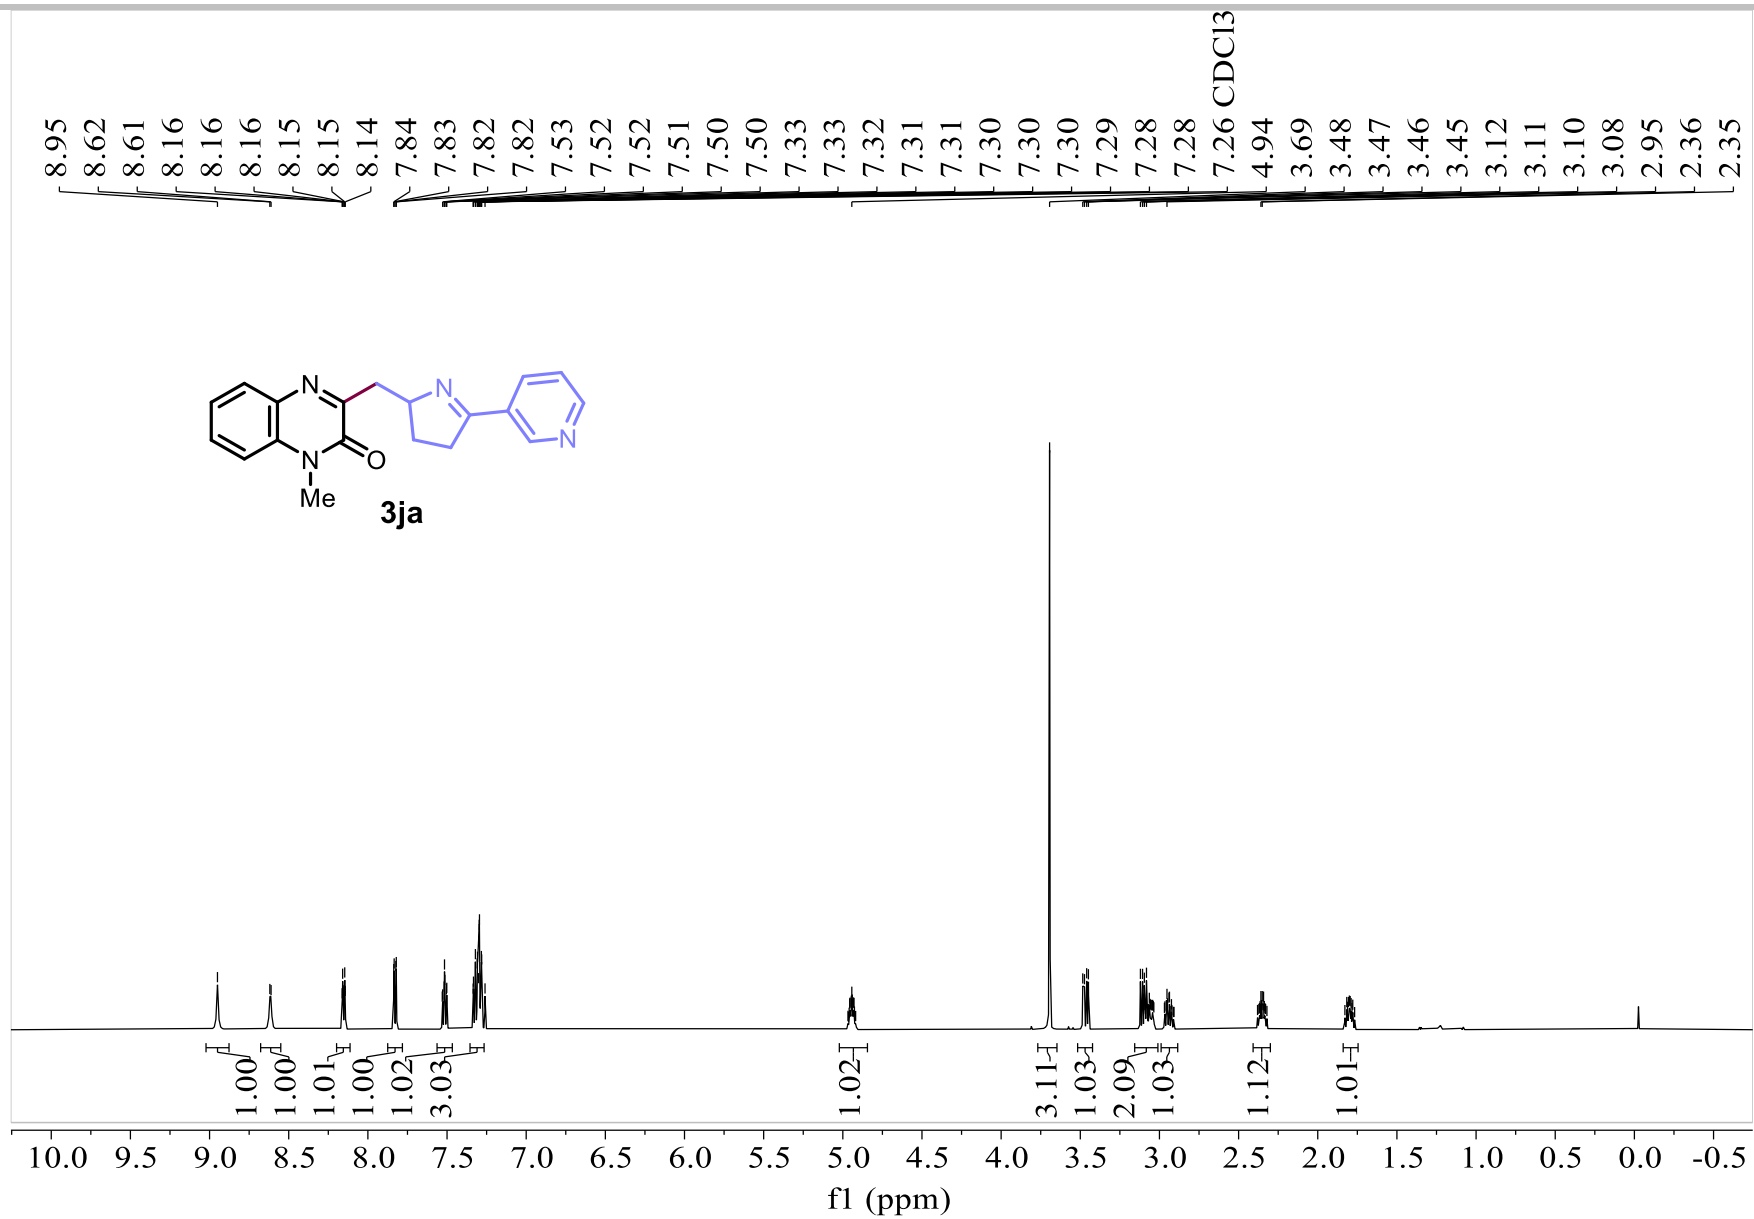



SUPPLEMENTARY INFORMATION

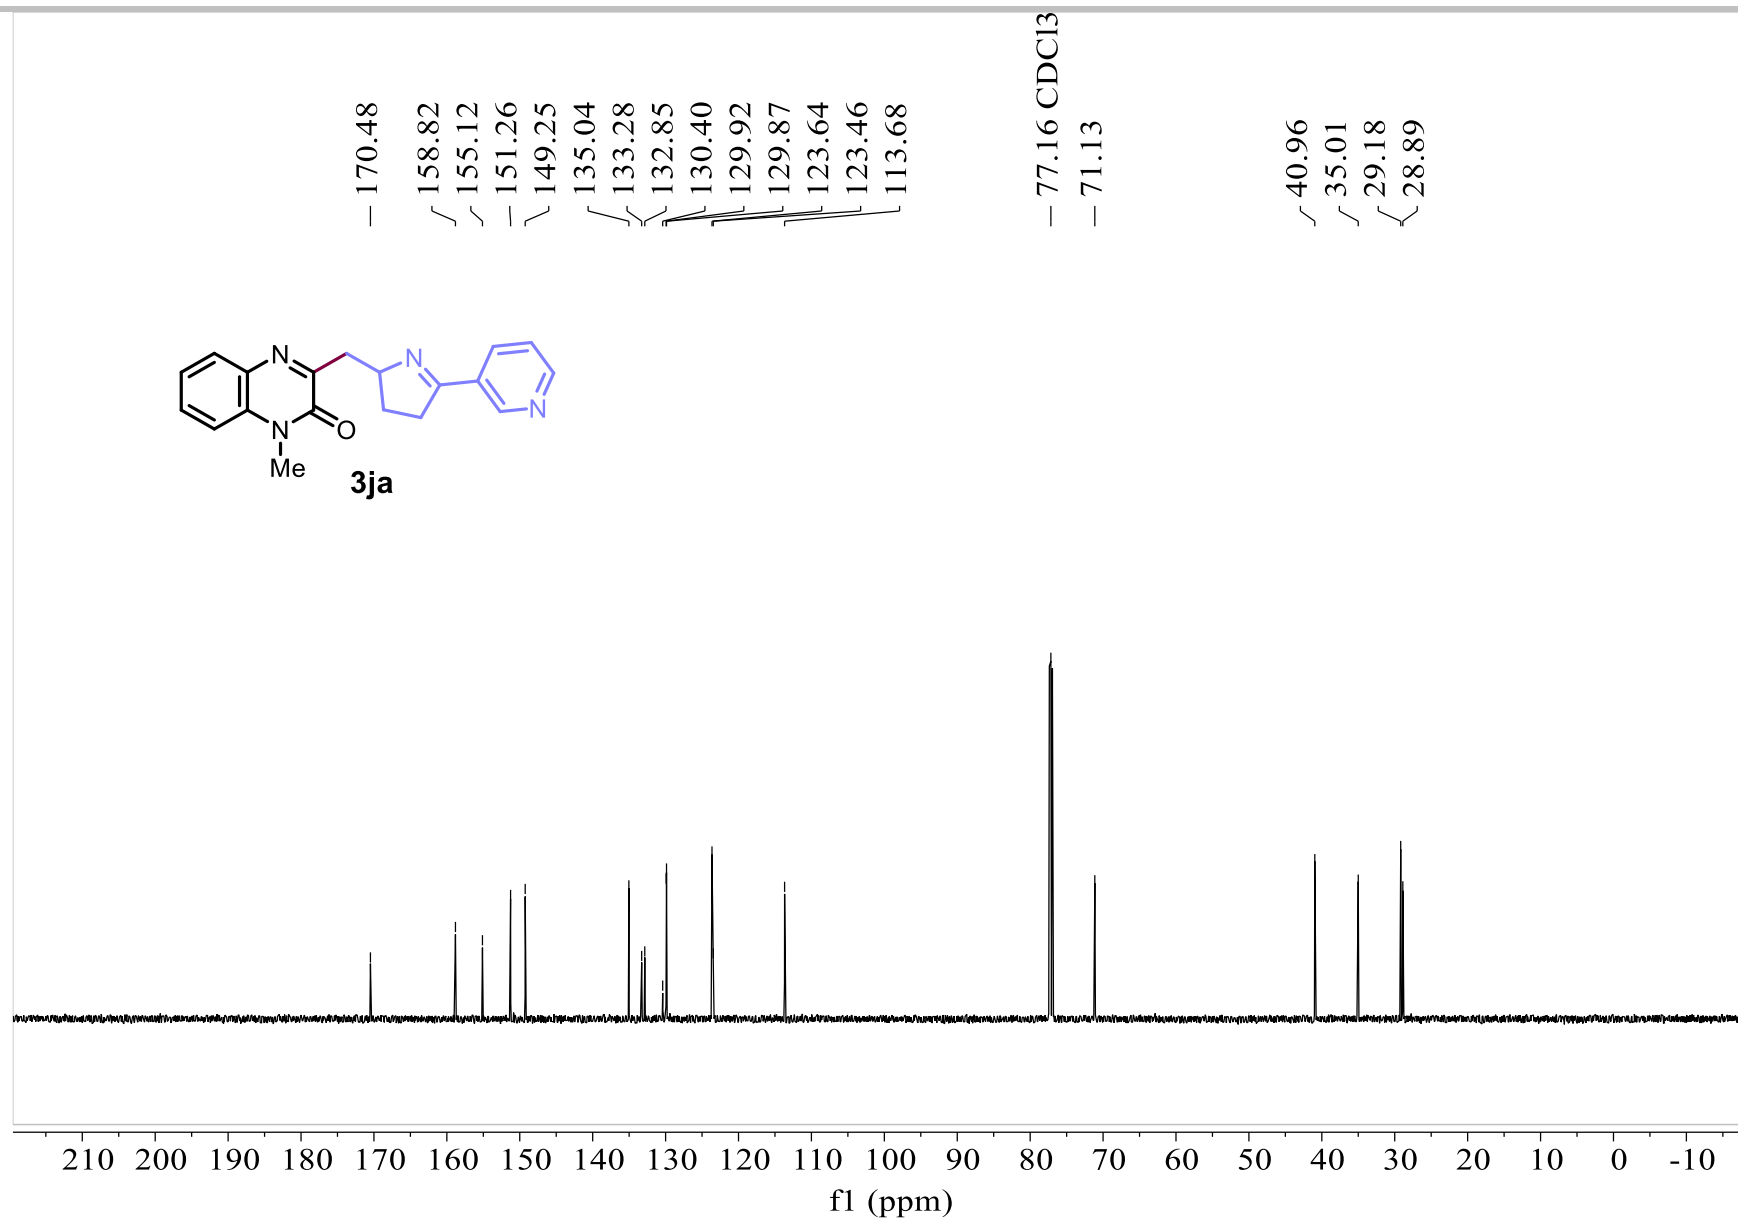

SUPPLEMENTARY INFORMATION

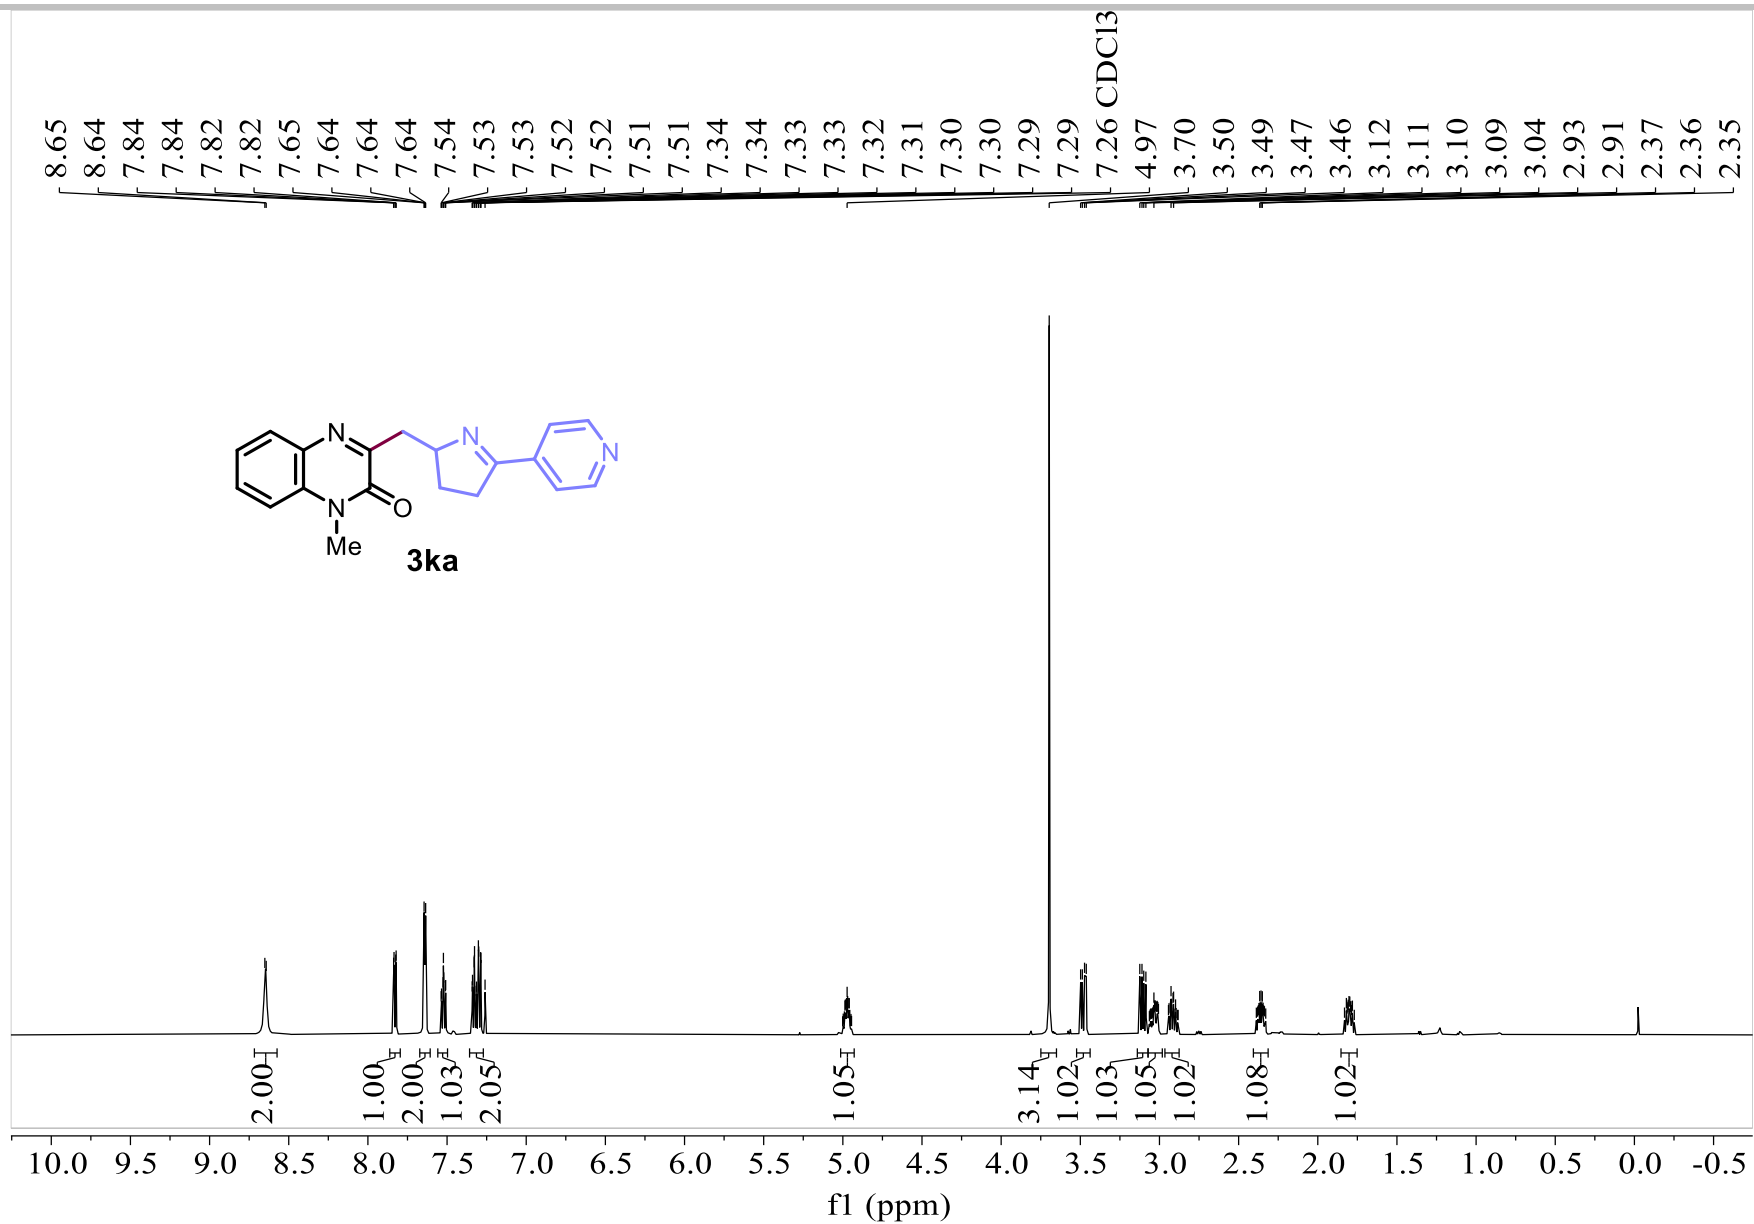

SUPPLEMENTARY INFORMATION

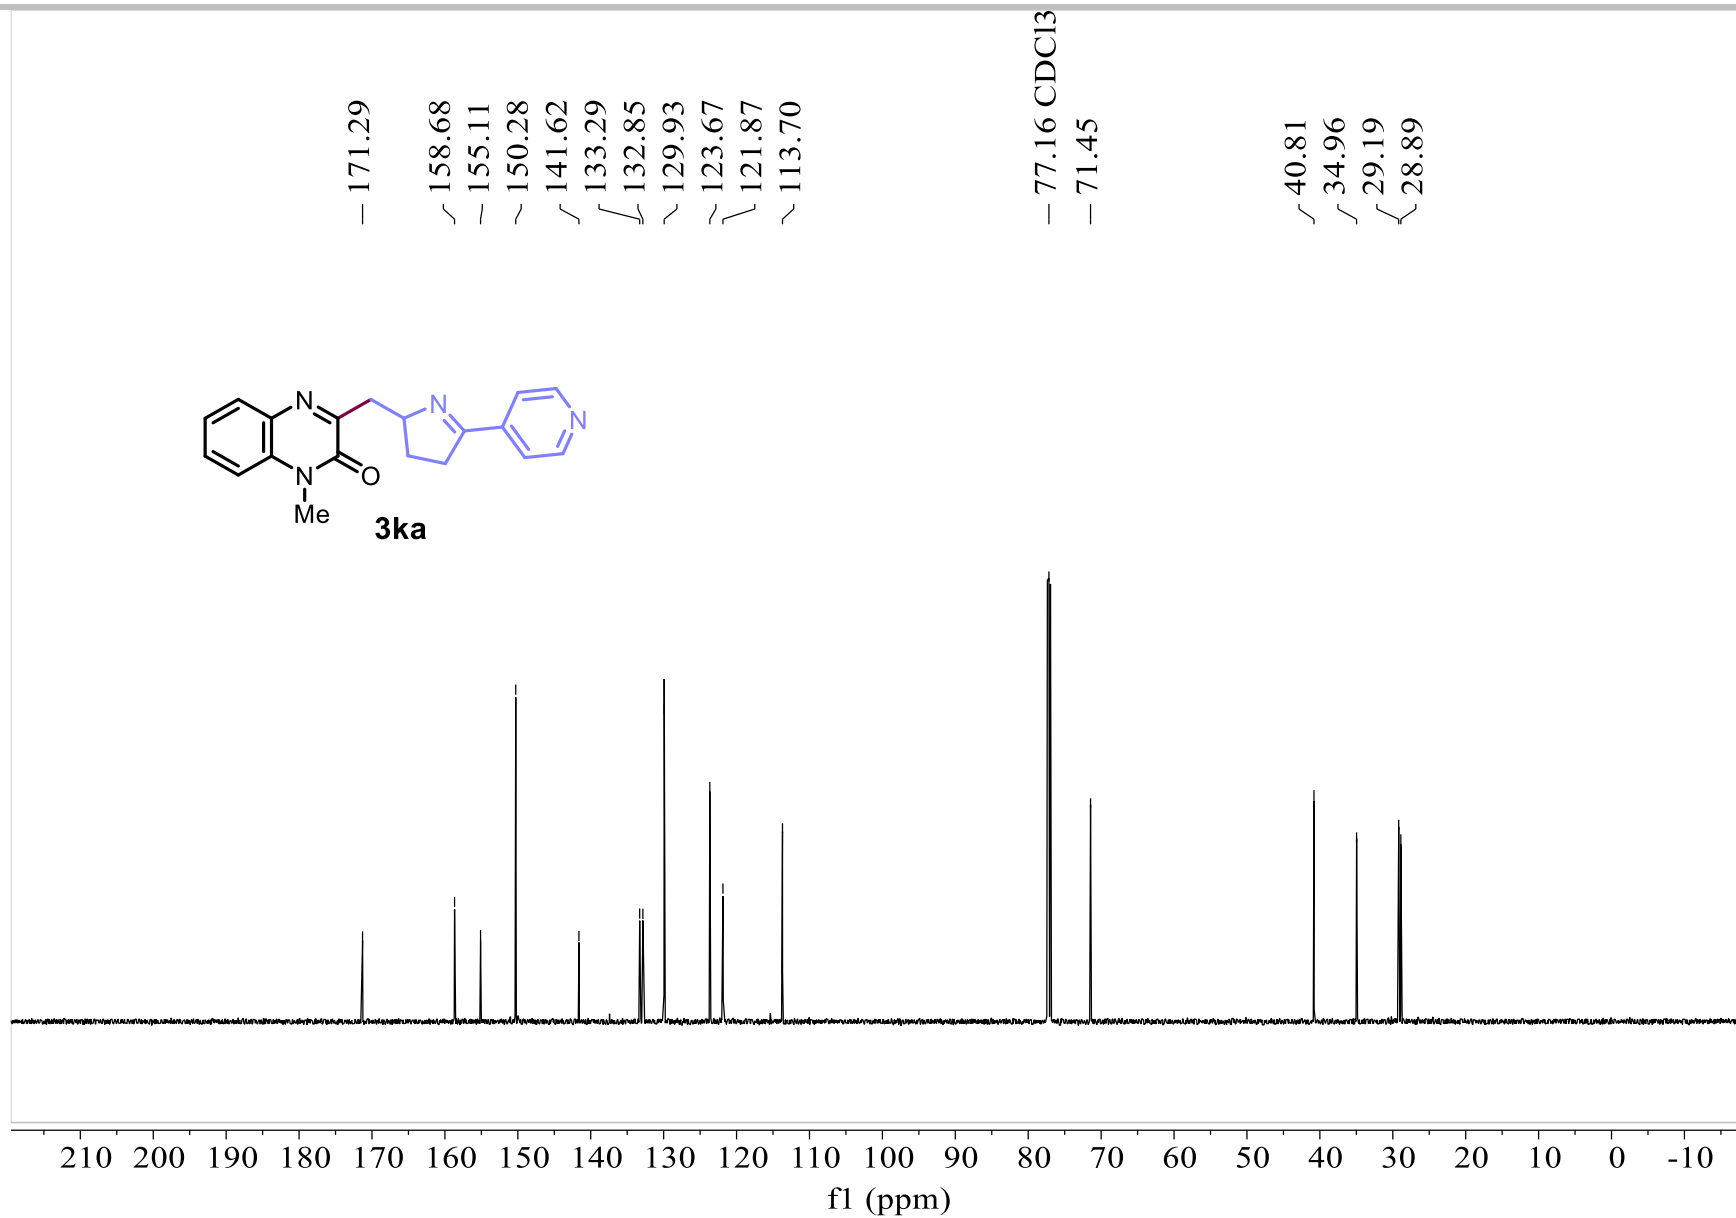

SUPPLEMENTARY INFORMATION

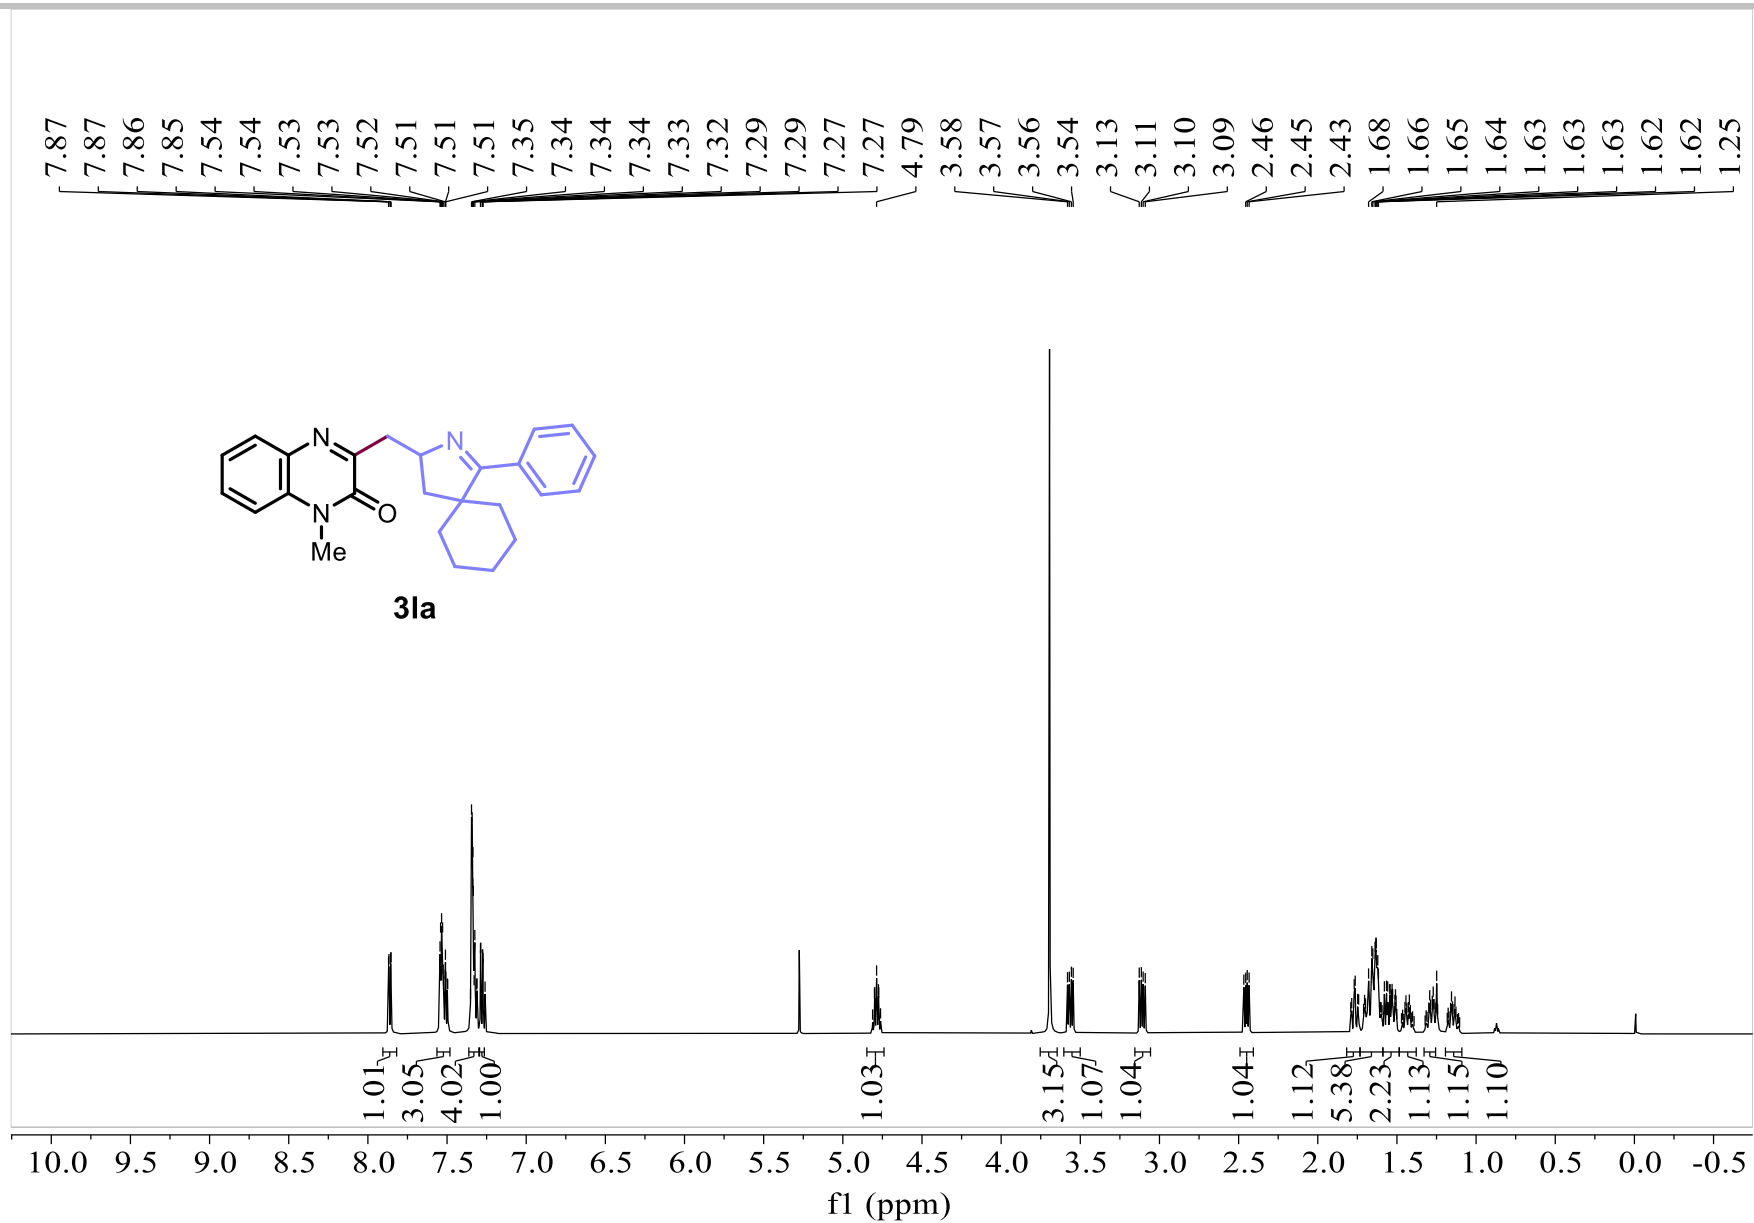

SUPPLEMENTARY INFORMATION

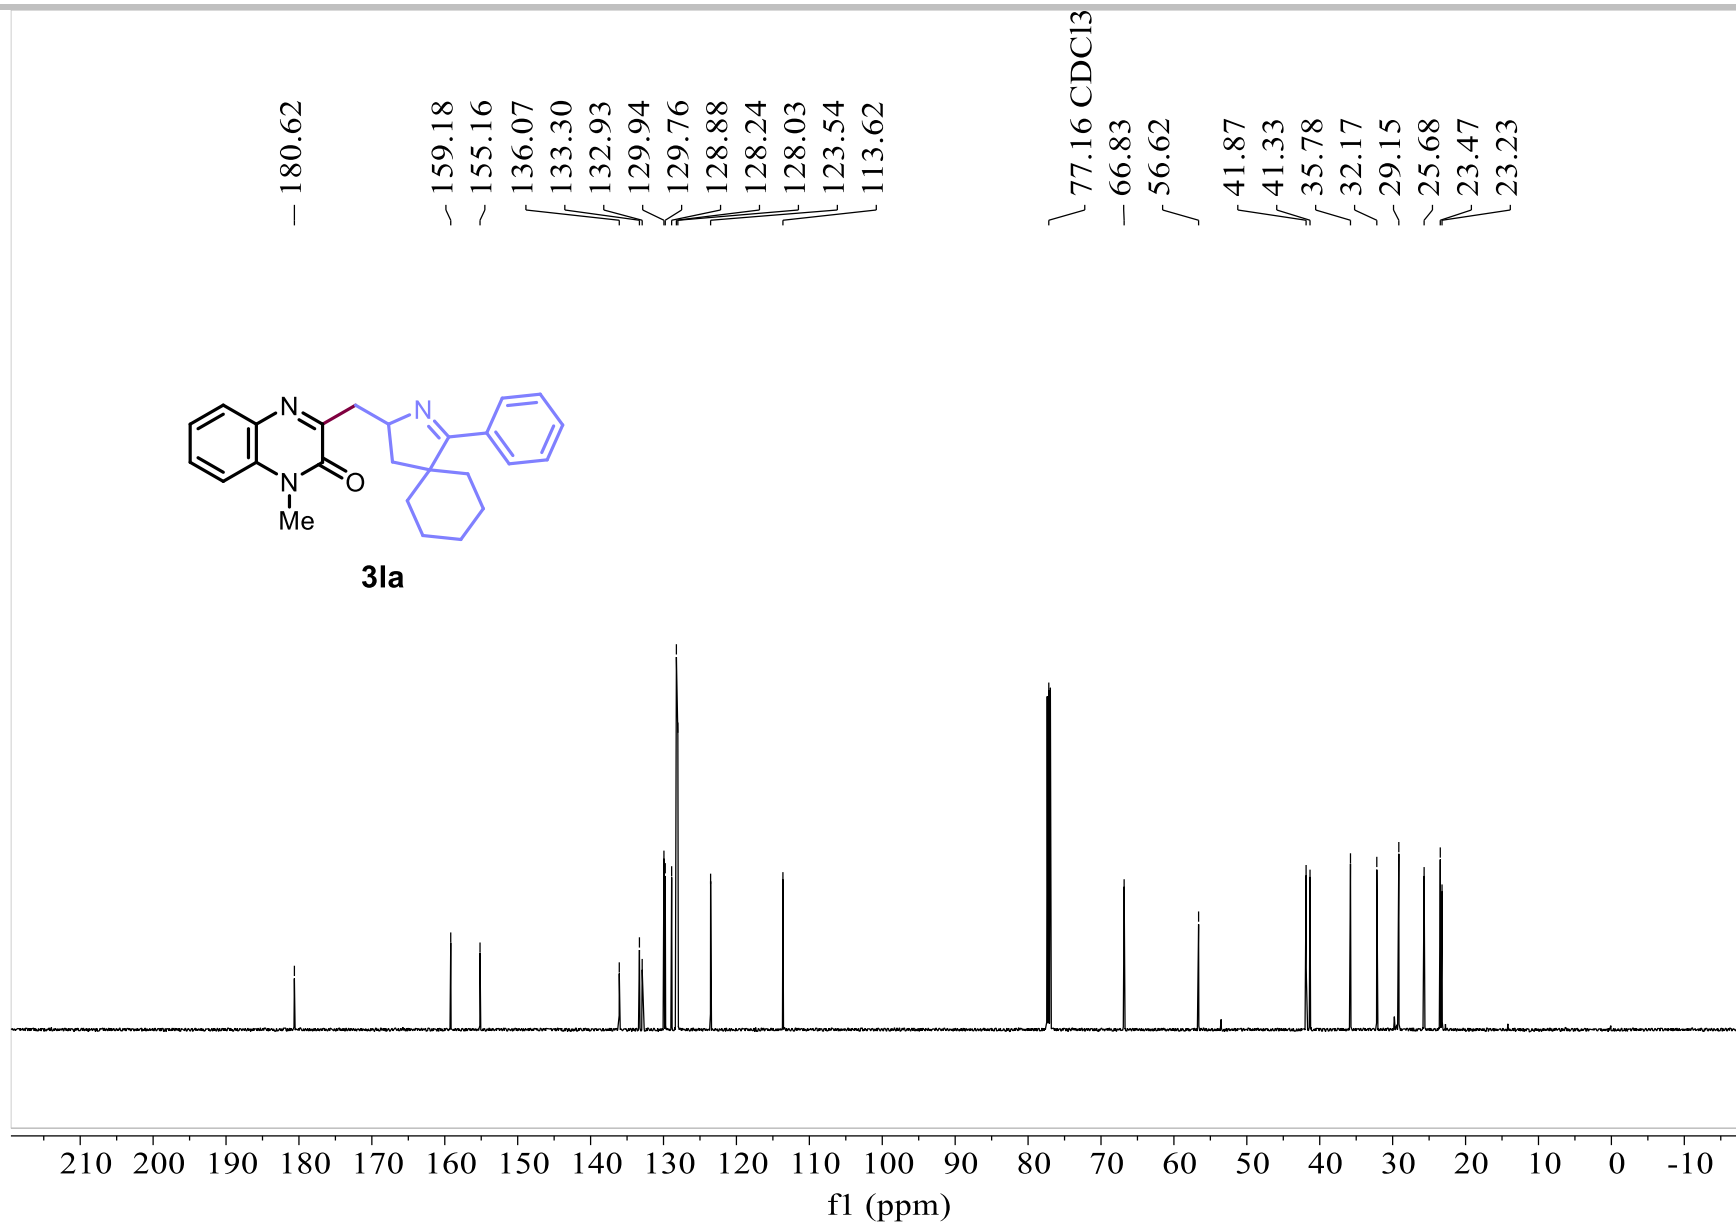

SUPPLEMENTARY INFORMATION

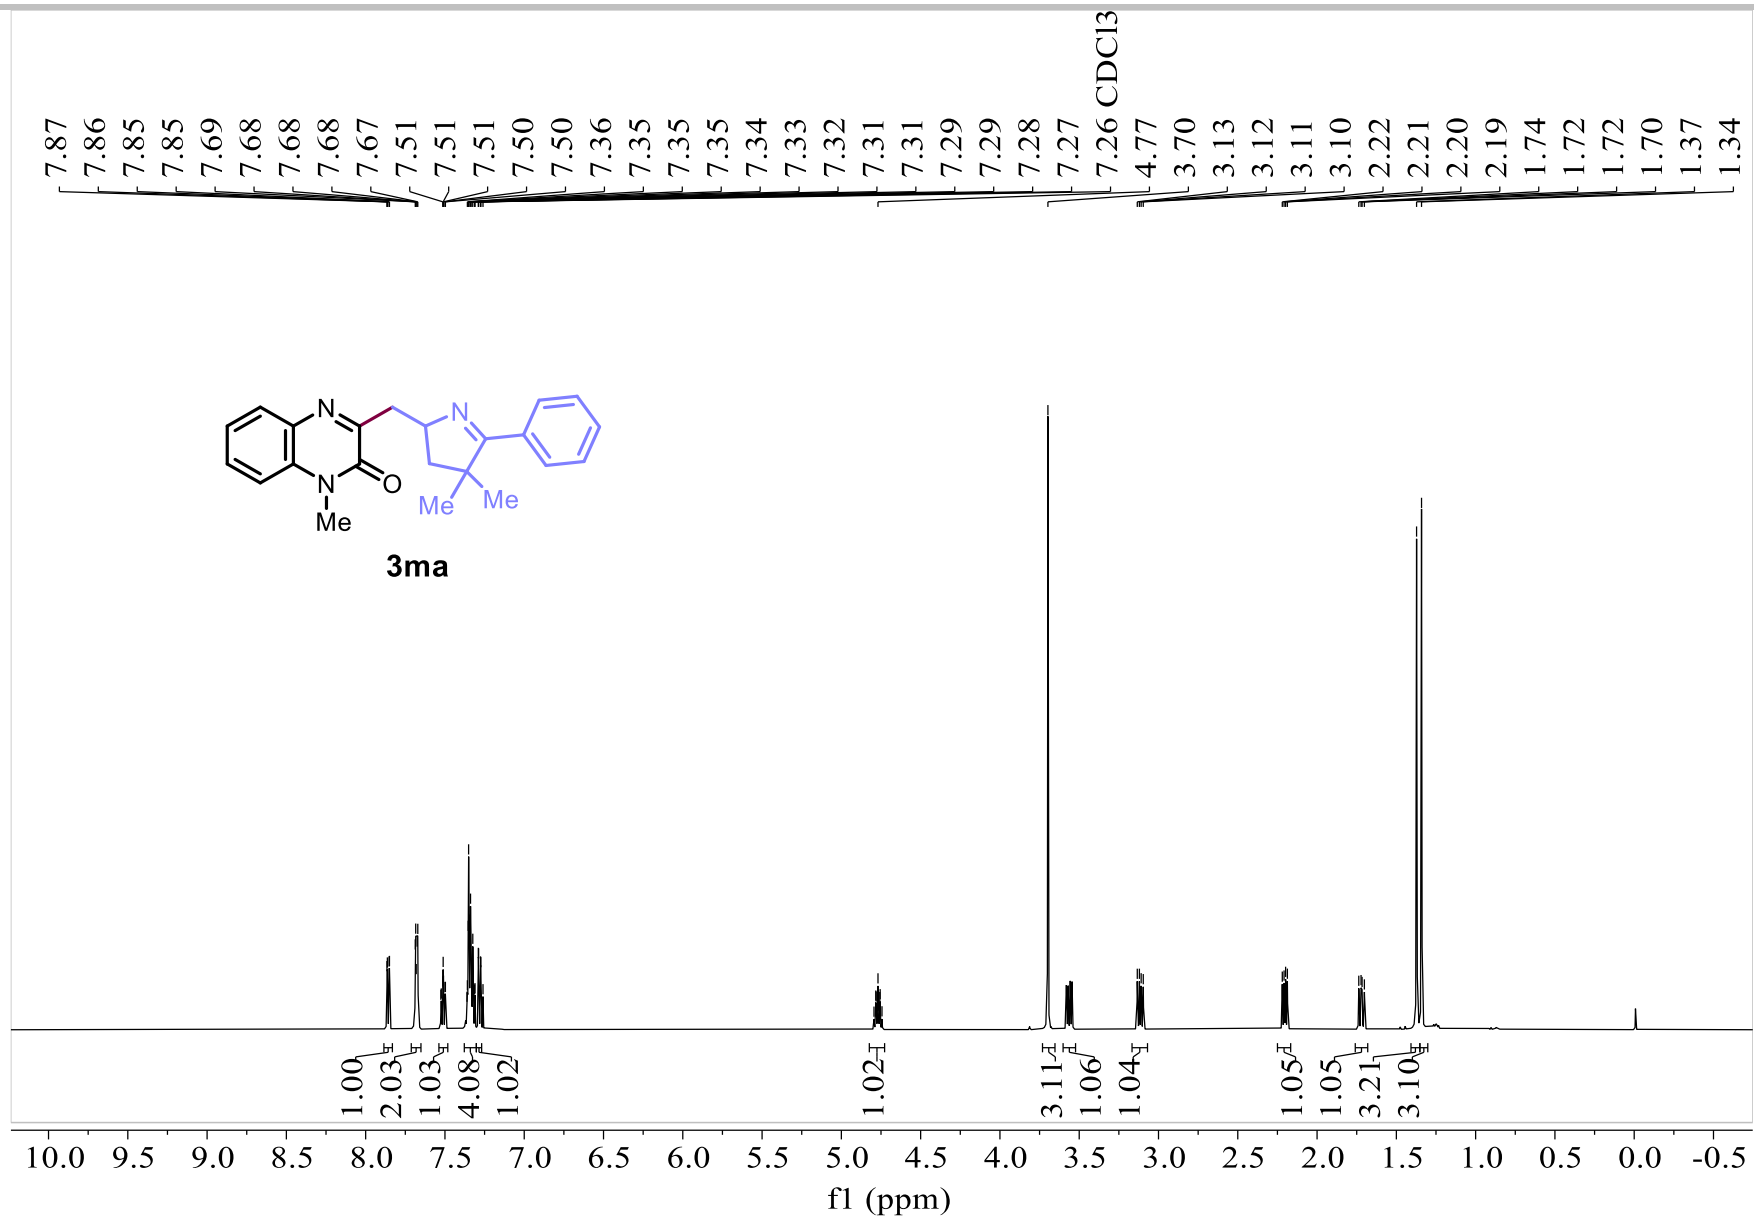

SUPPLEMENTARY INFORMATION

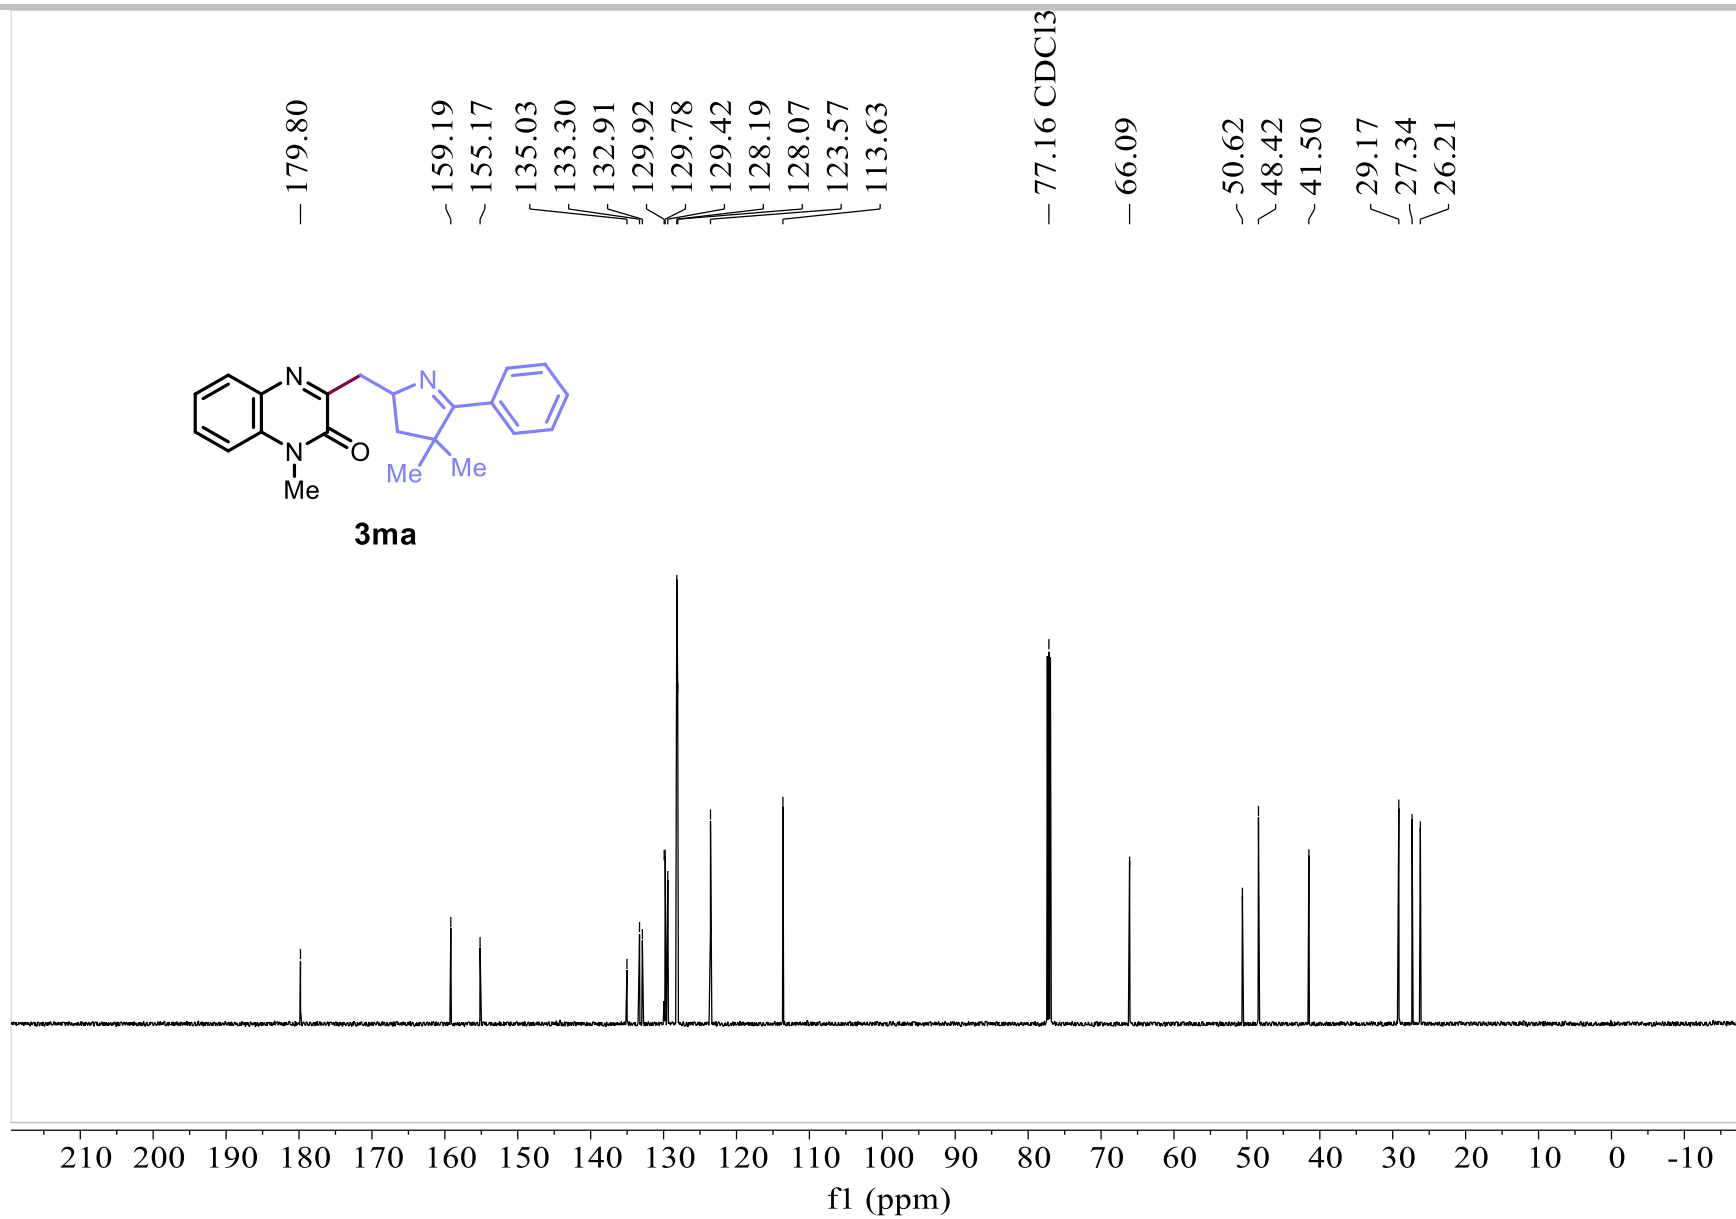

SUPPLEMENTARY INFORMATION

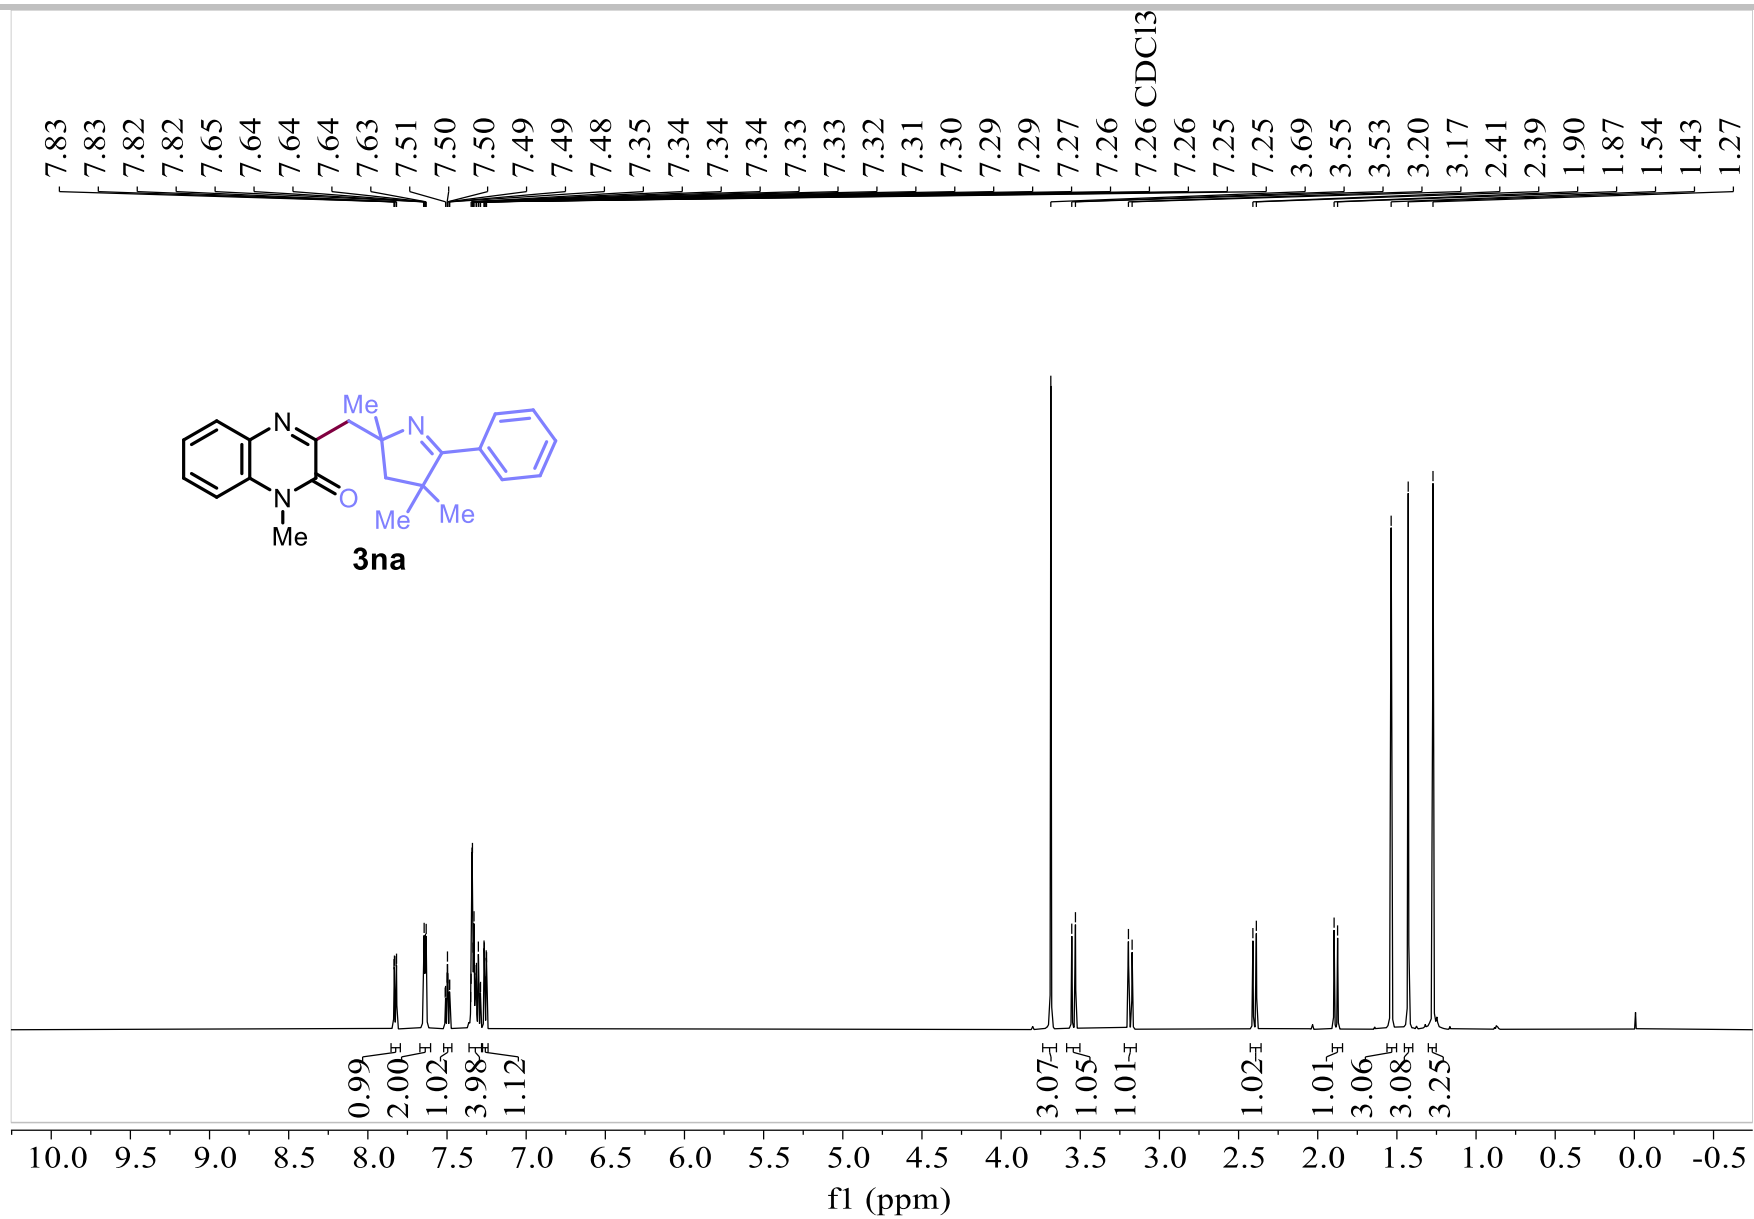



SUPPLEMENTARY INFORMATION

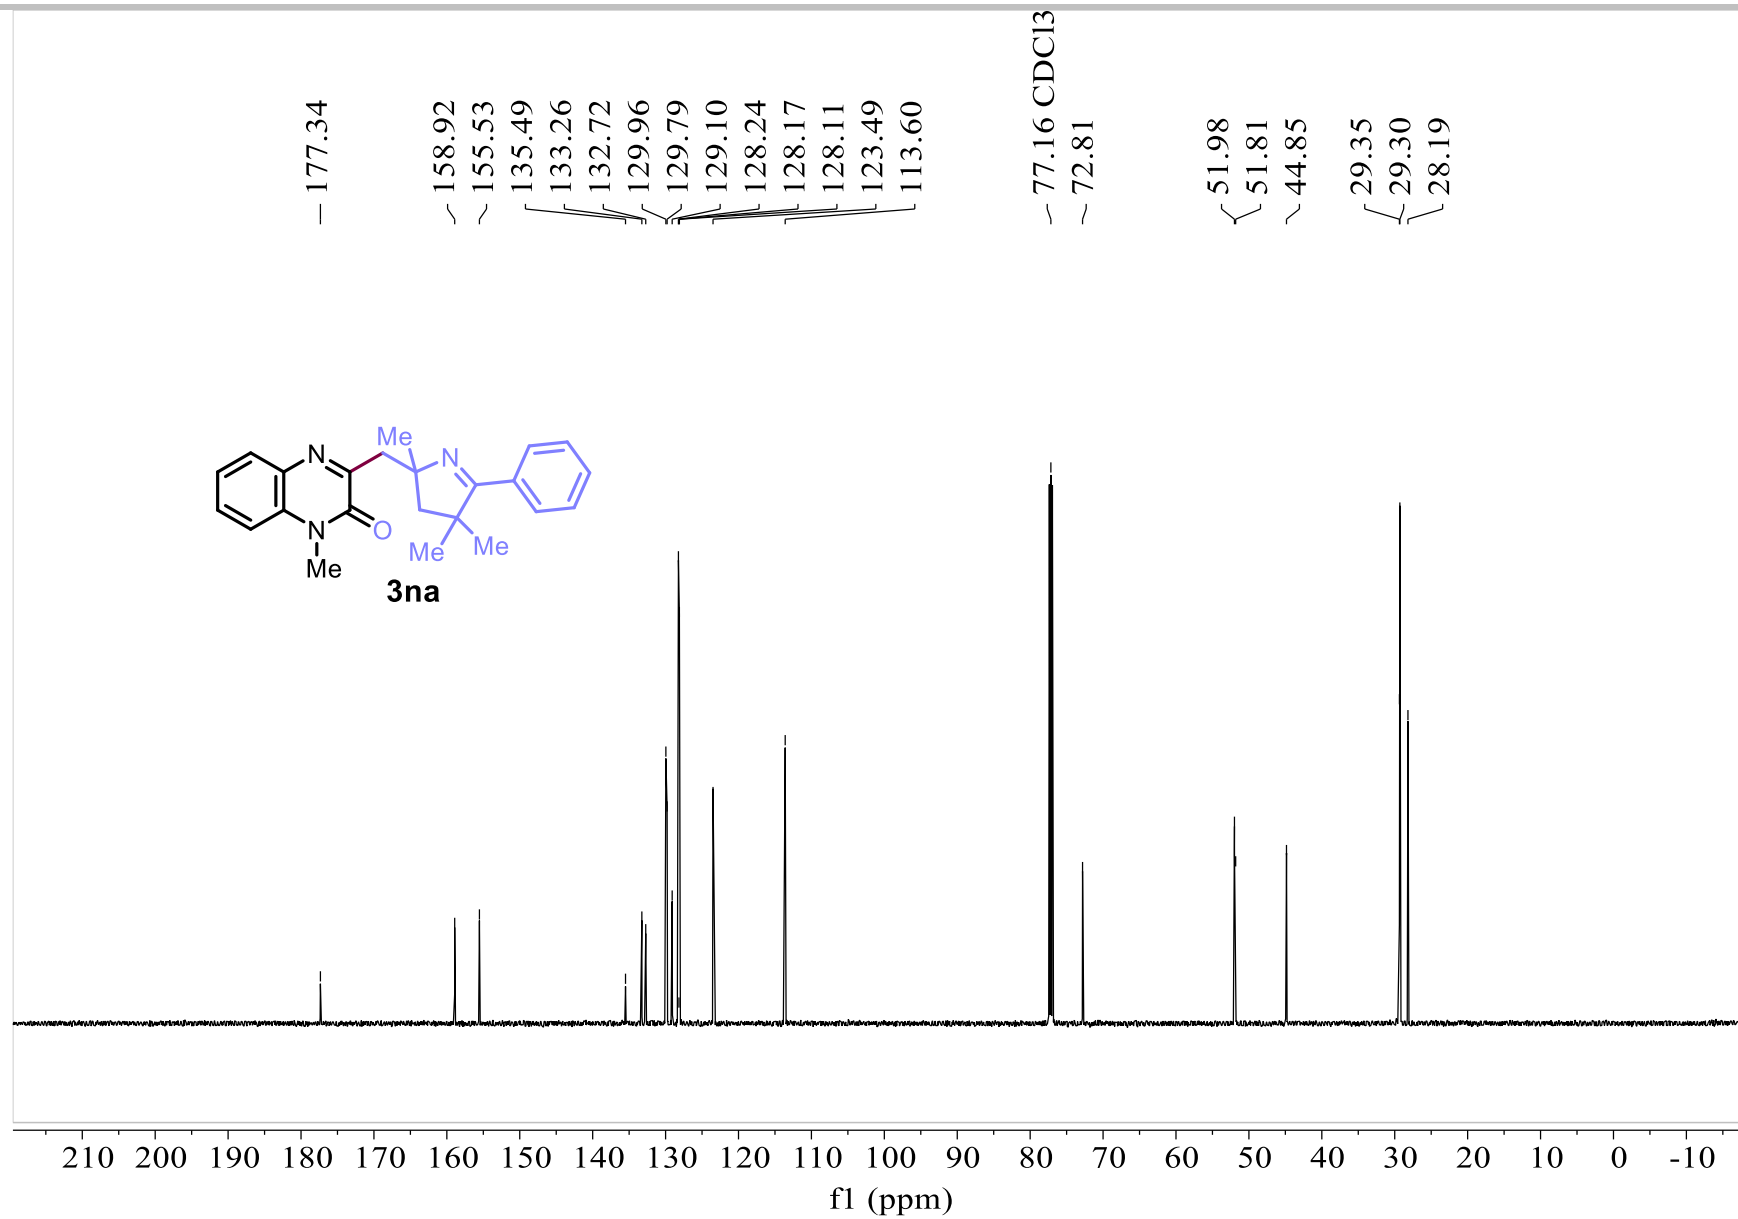

SUPPLEMENTARY INFORMATION

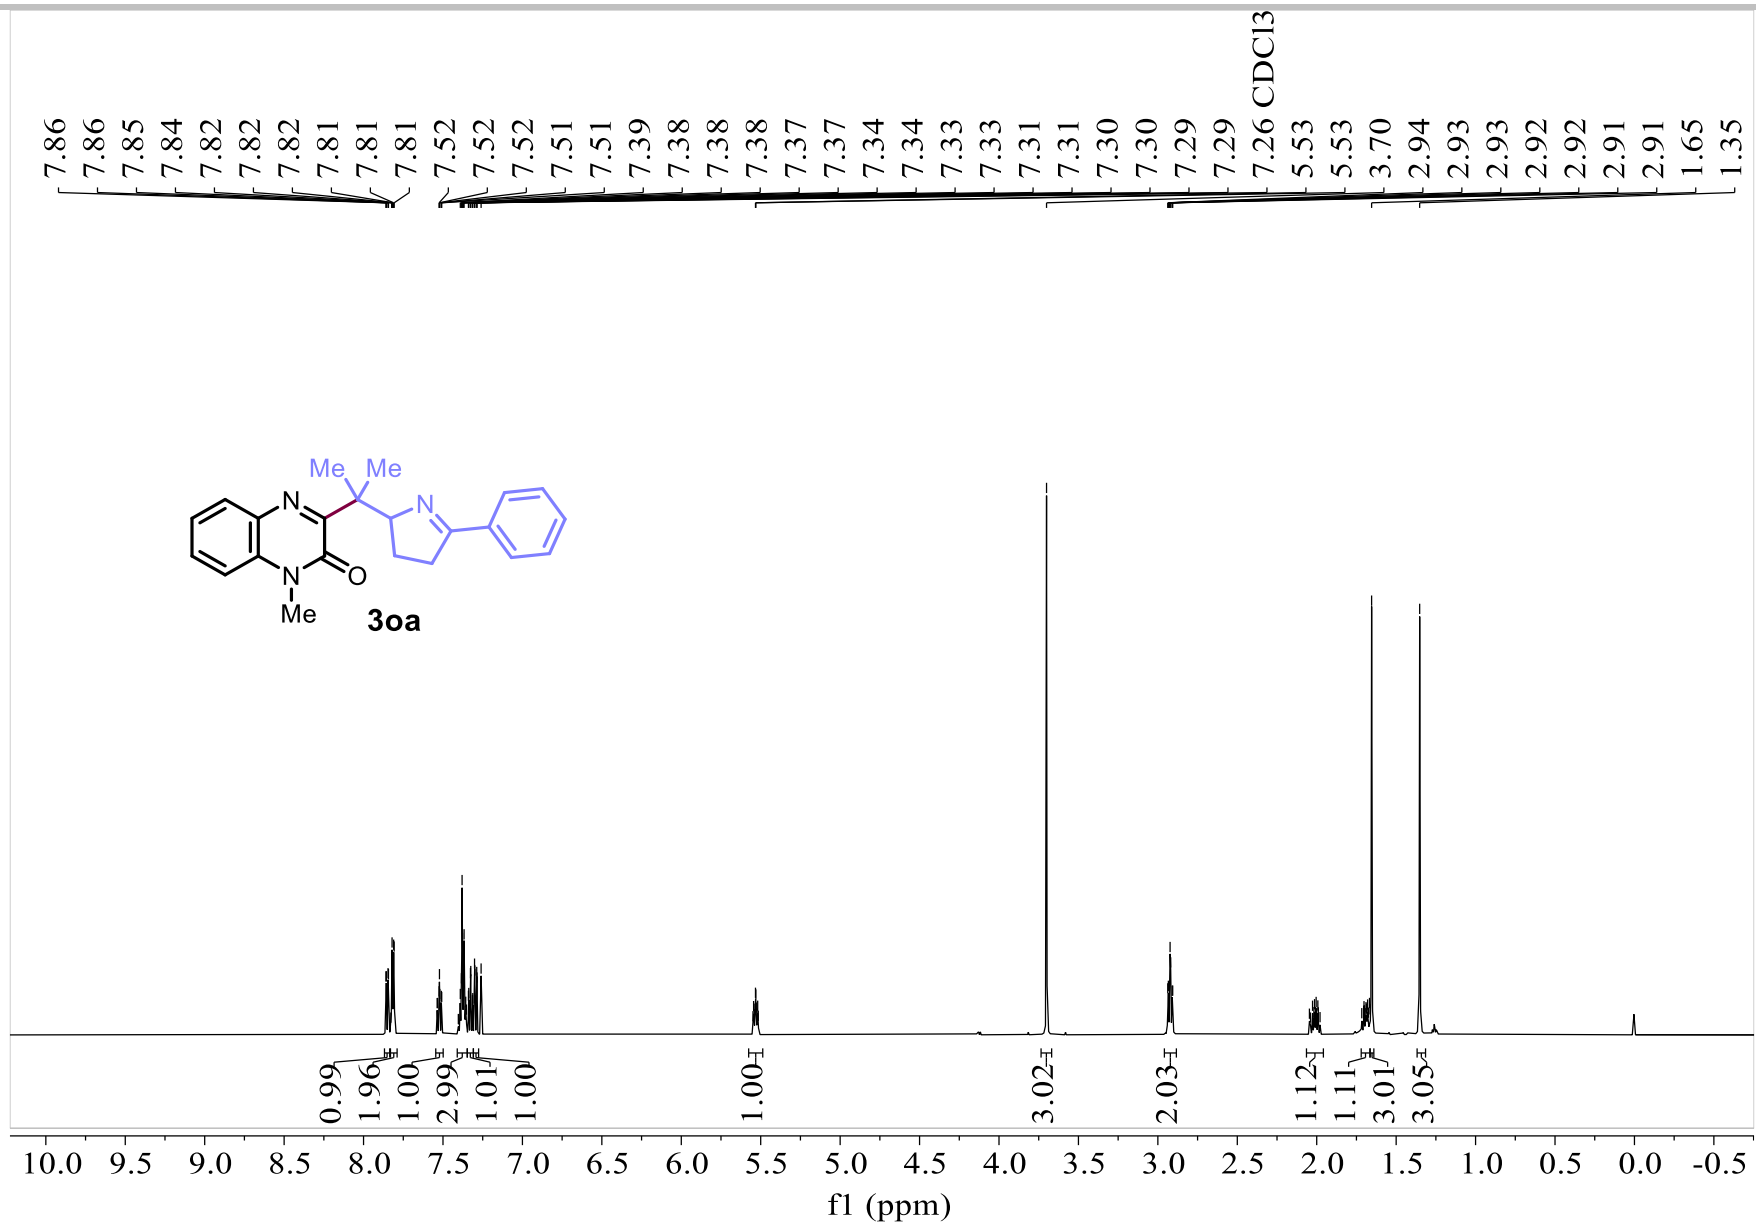

SUPPLEMENTARY INFORMATION

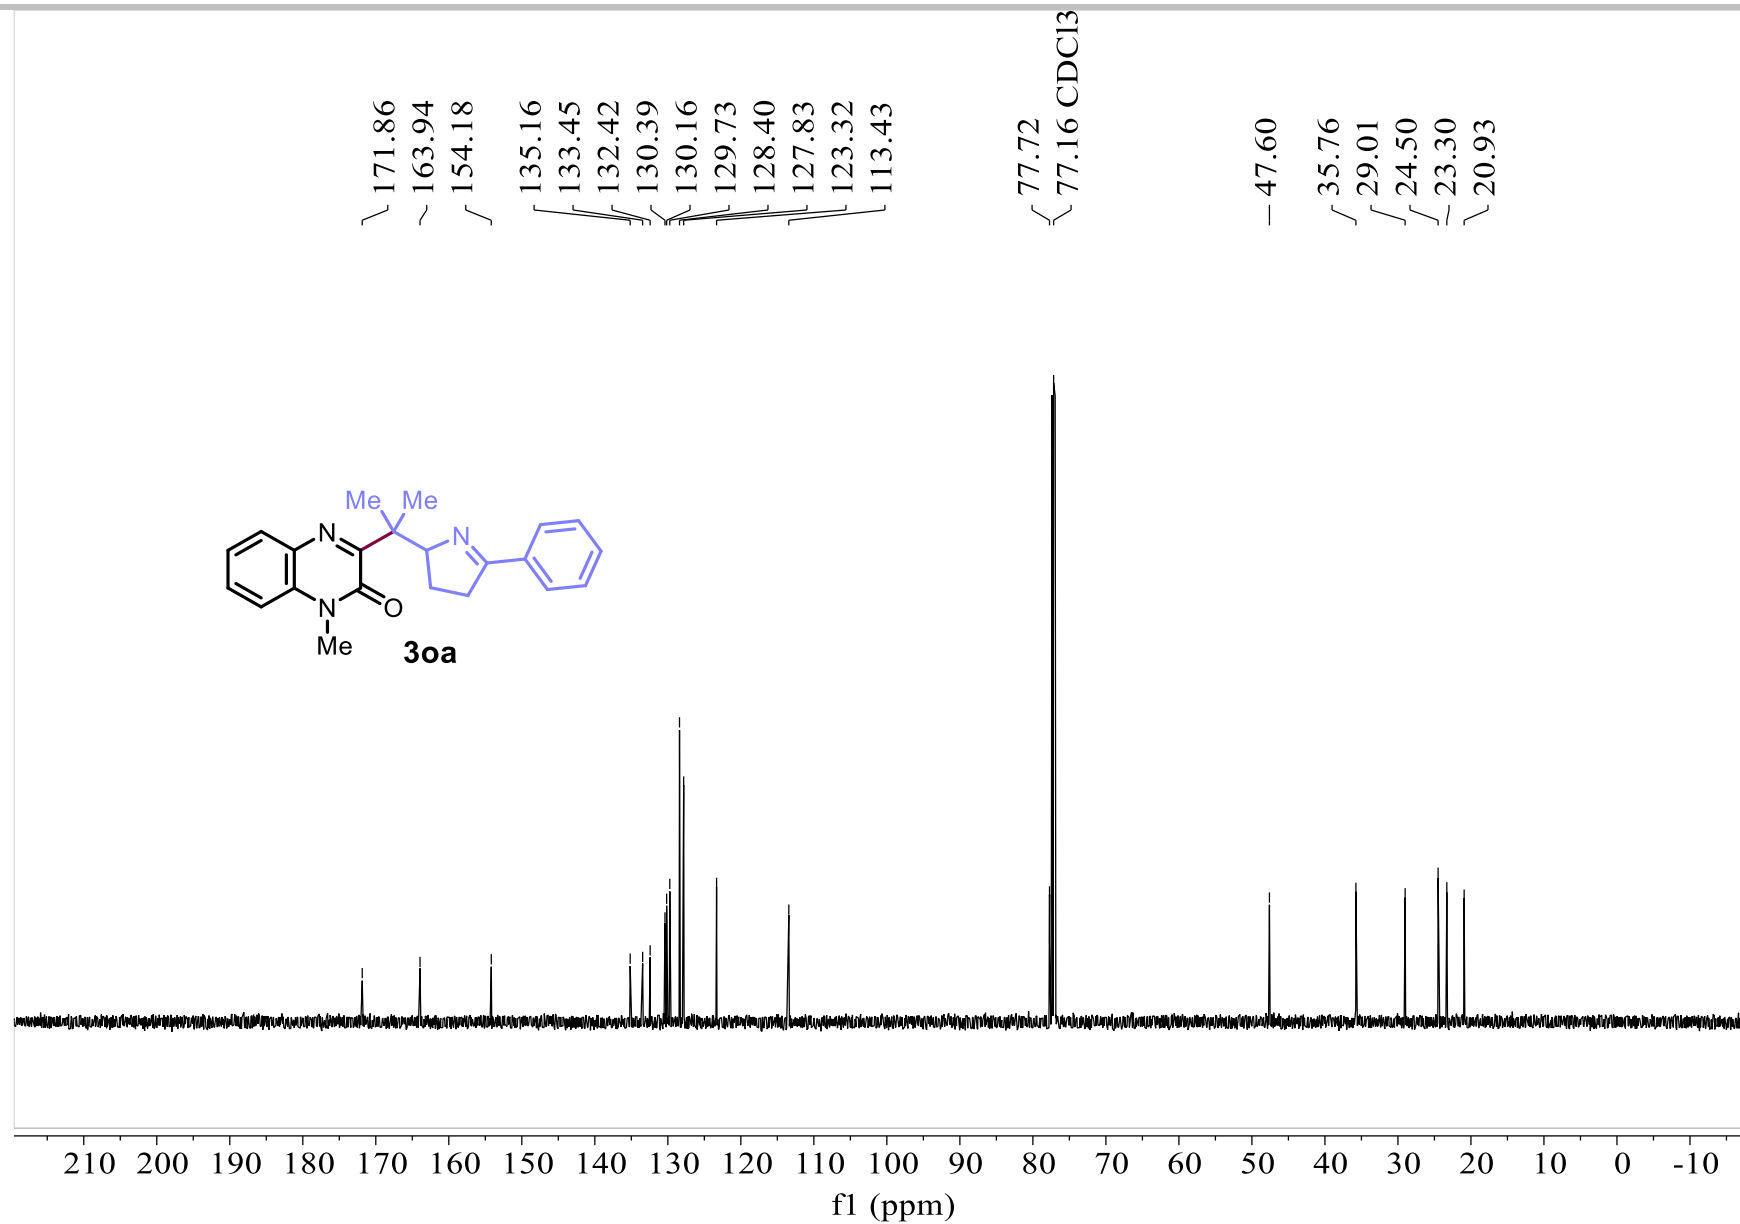

SUPPLEMENTARY INFORMATION

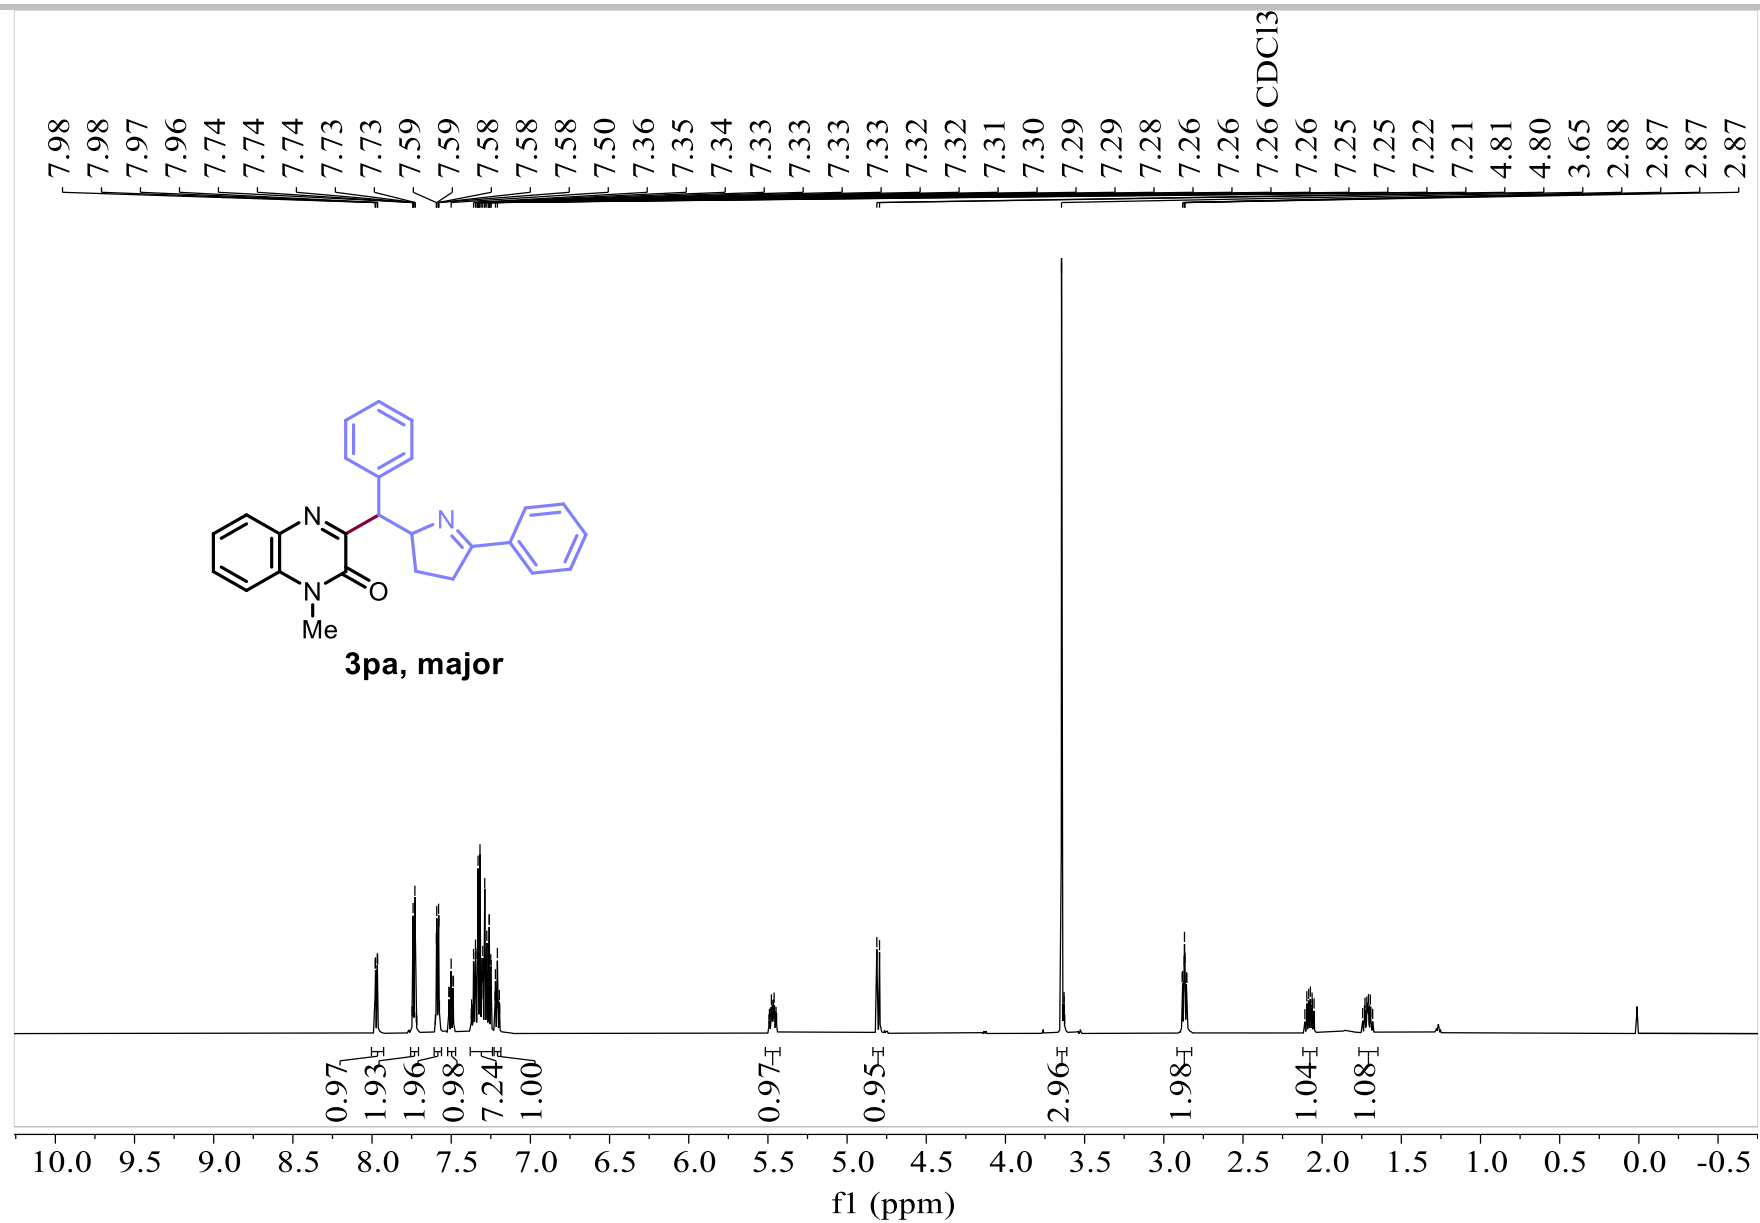

SUPPLEMENTARY INFORMATION

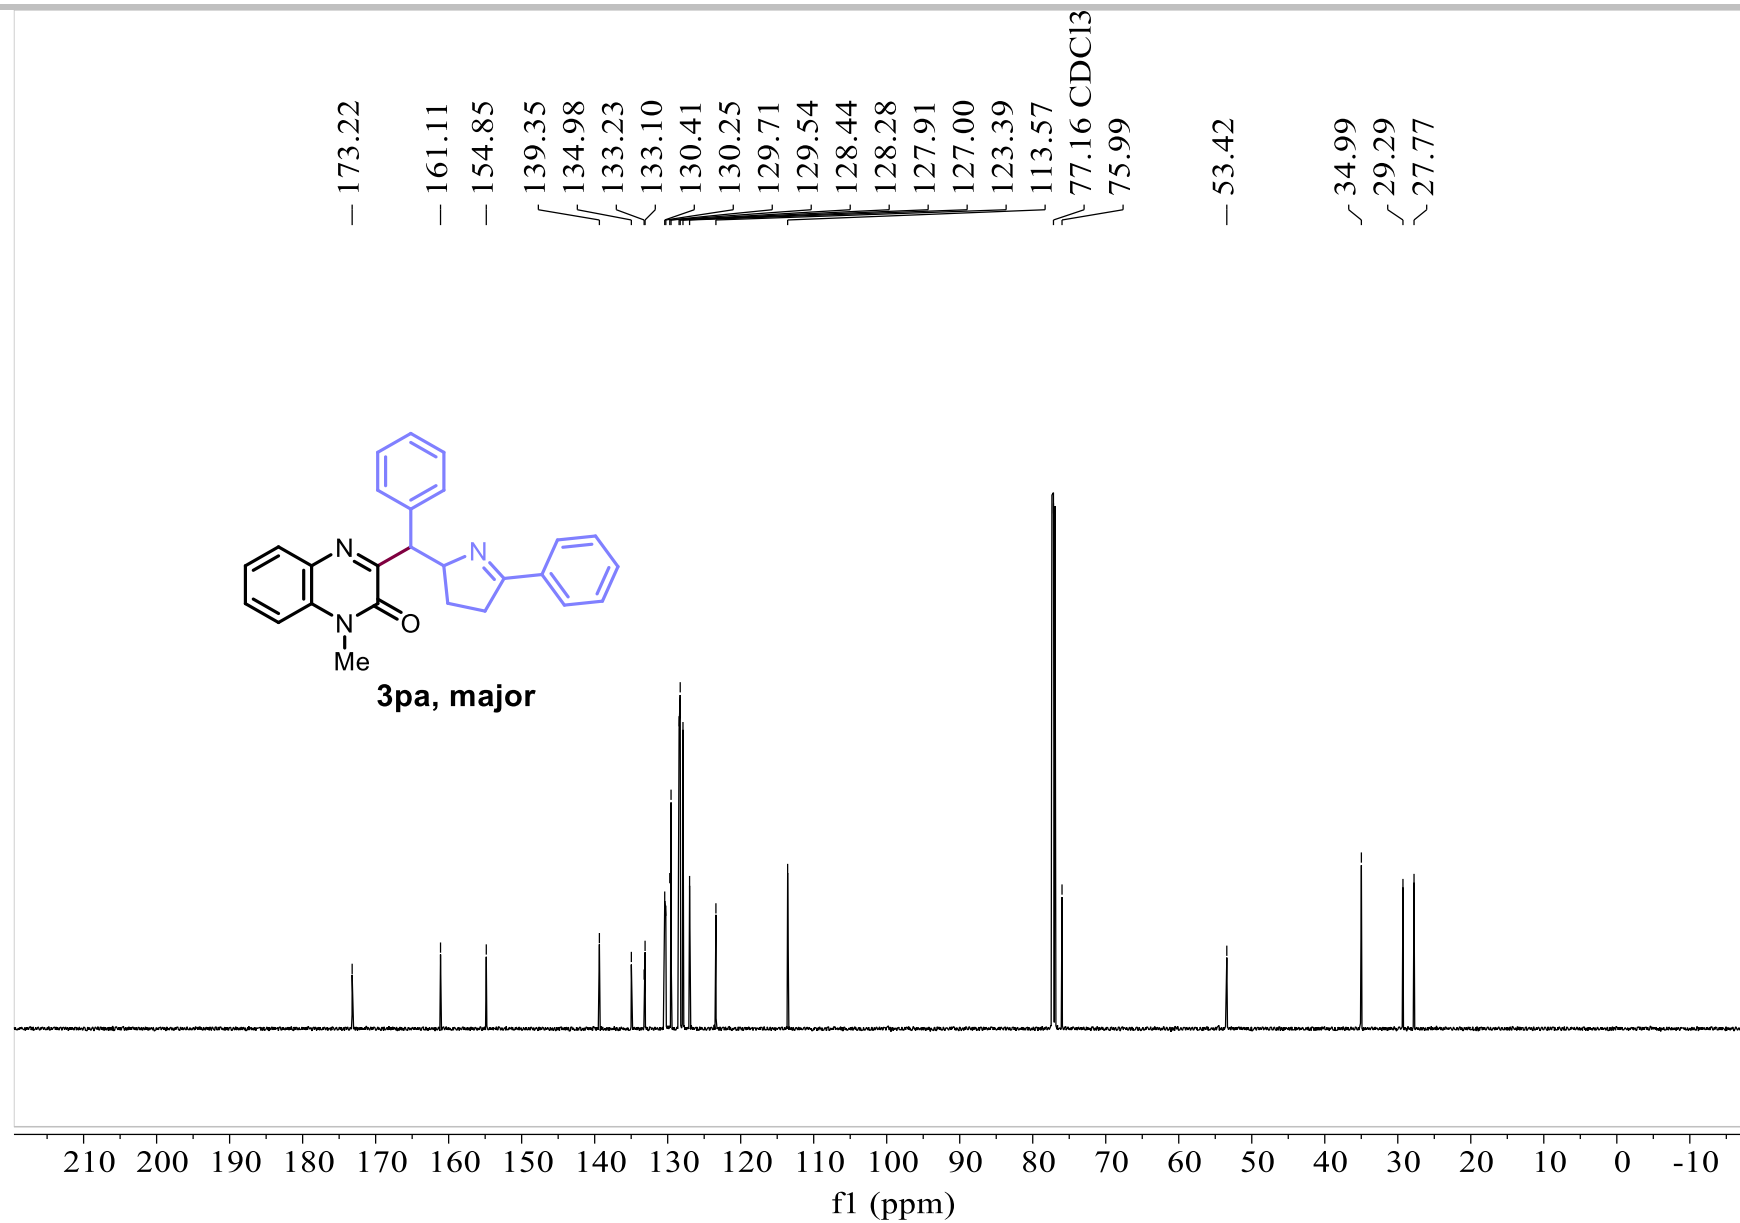

SUPPLEMENTARY INFORMATION

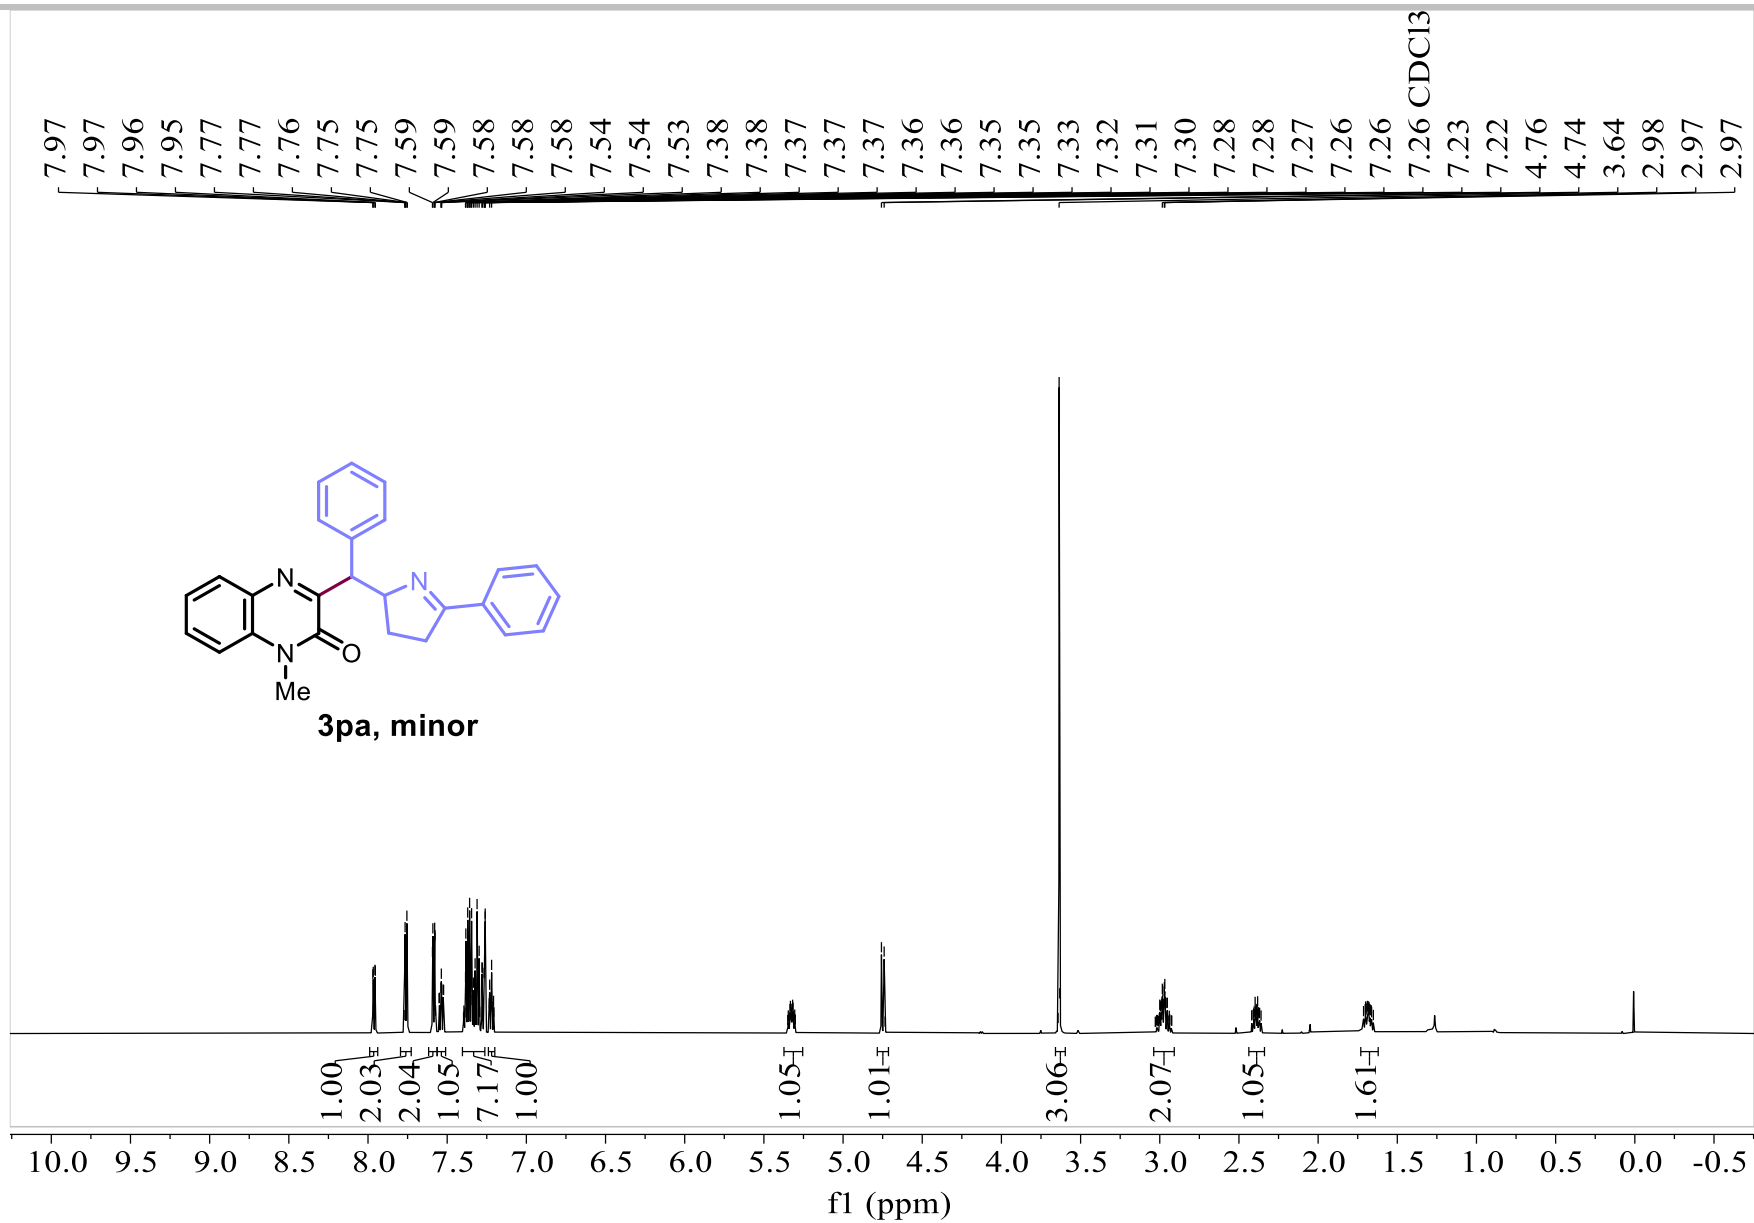

SUPPLEMENTARY INFORMATION

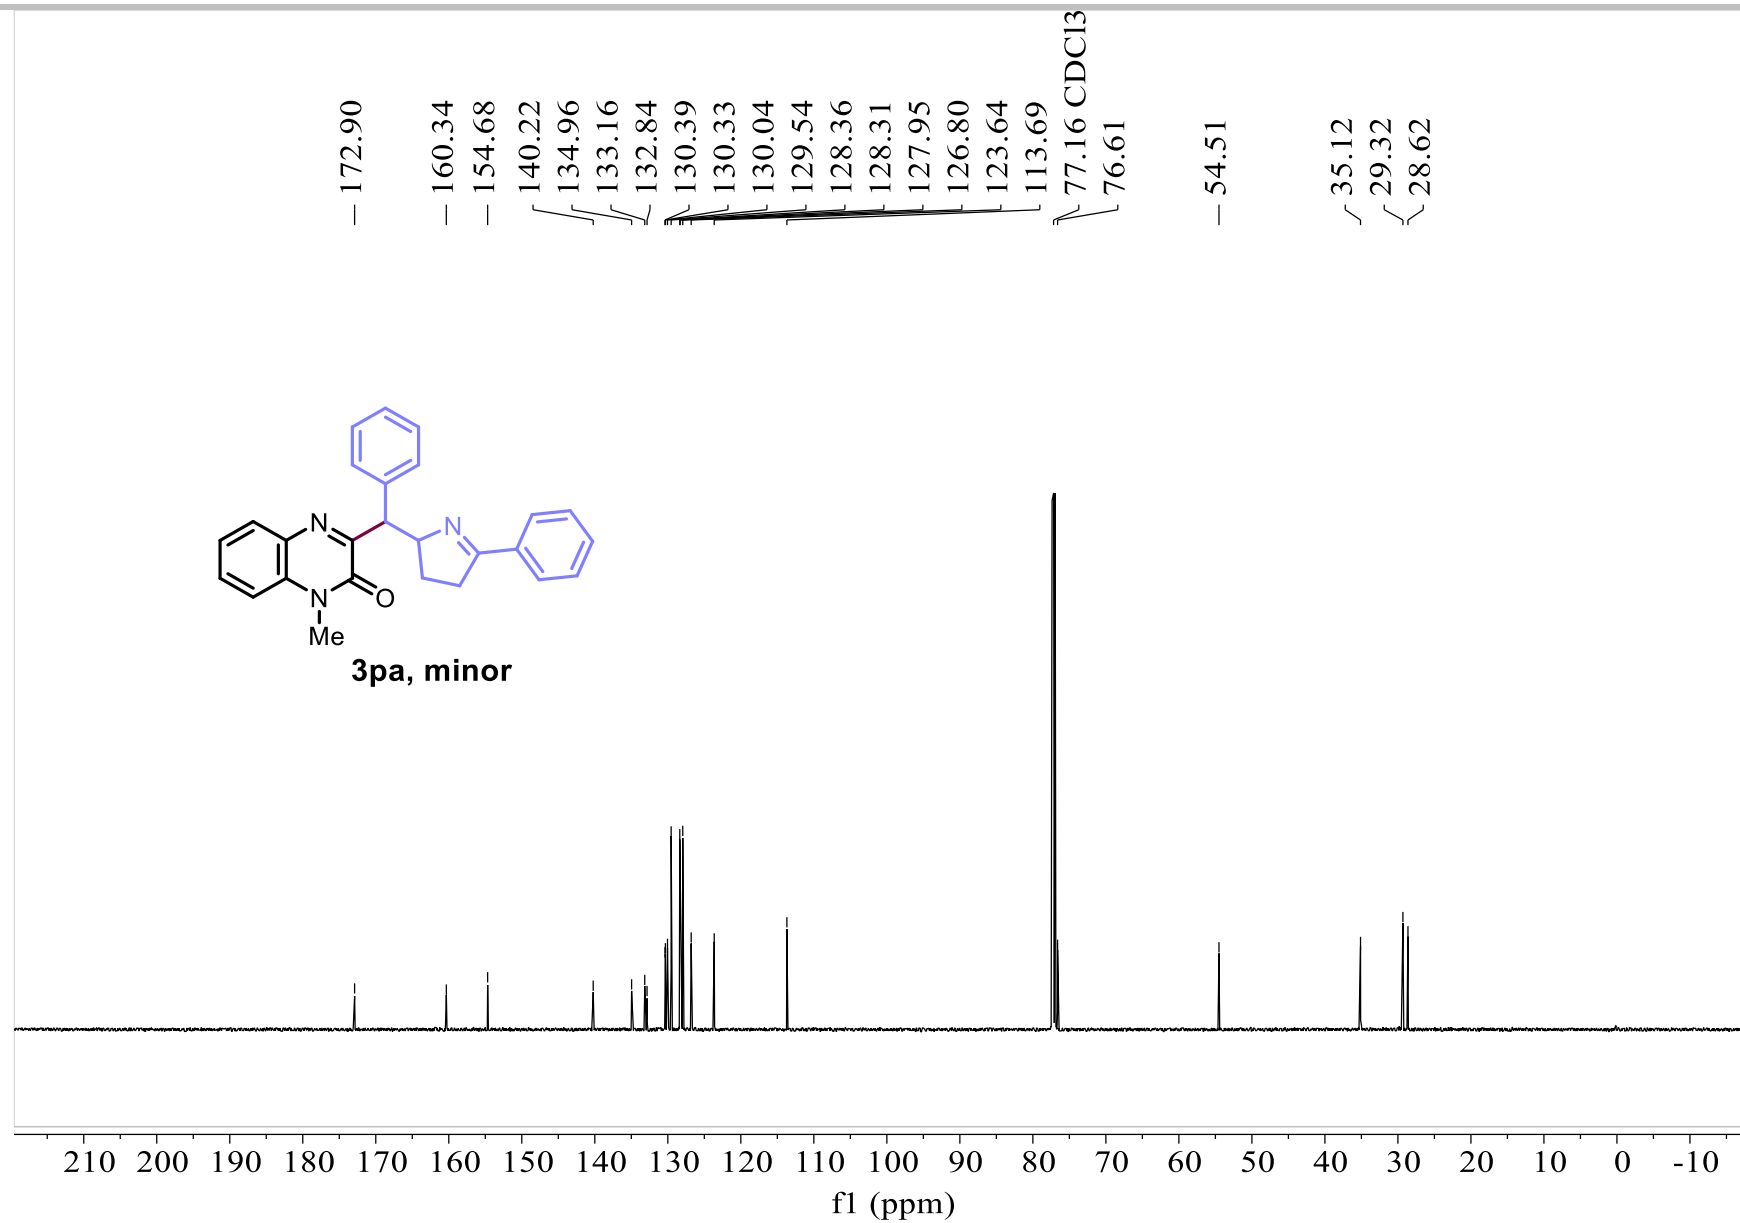

SUPPLEMENTARY INFORMATION

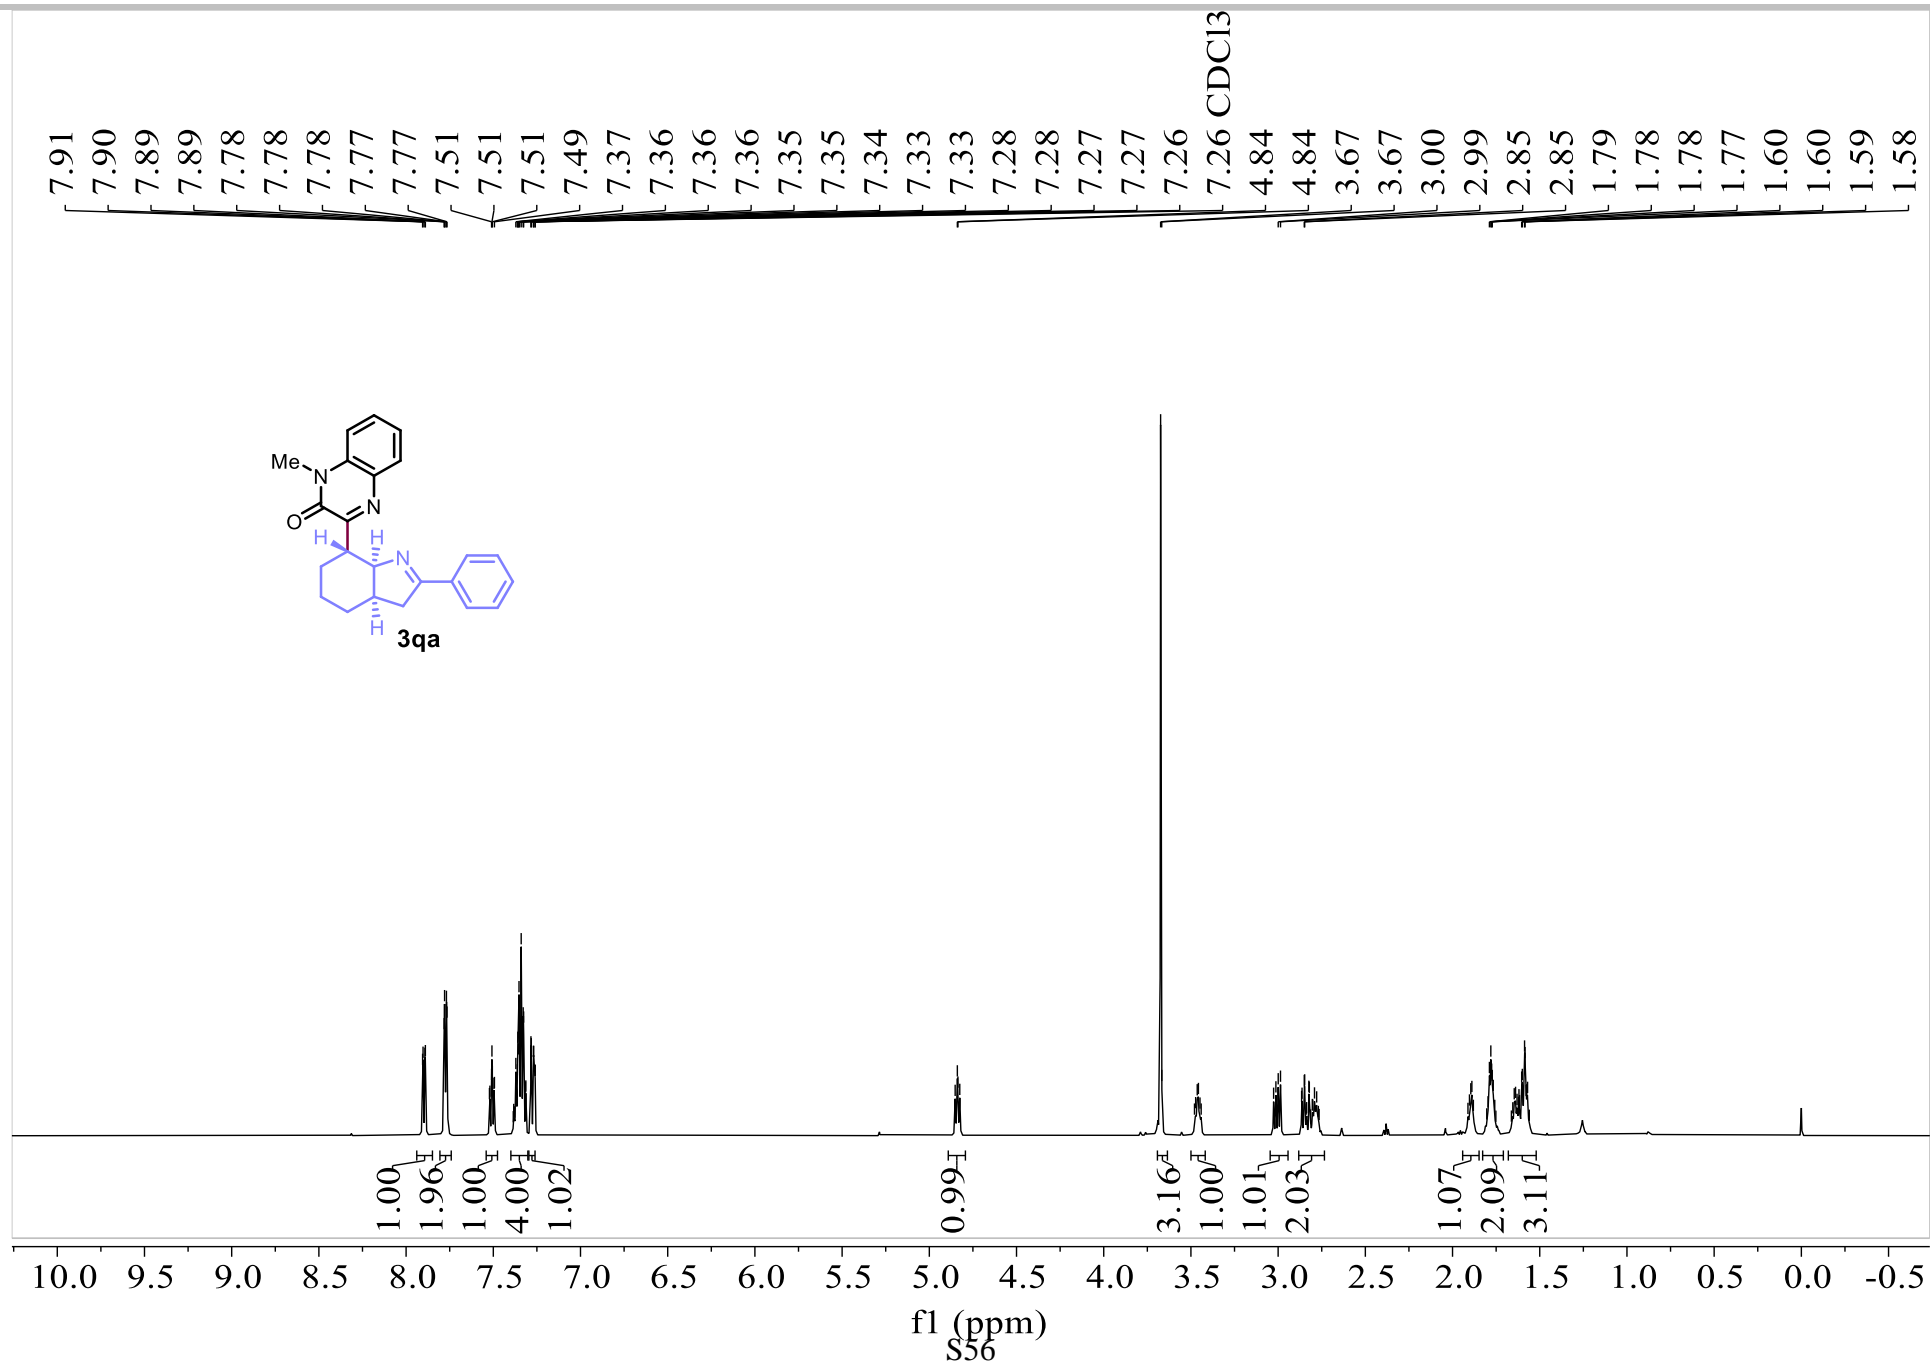



SUPPLEMENTARY INFORMATION

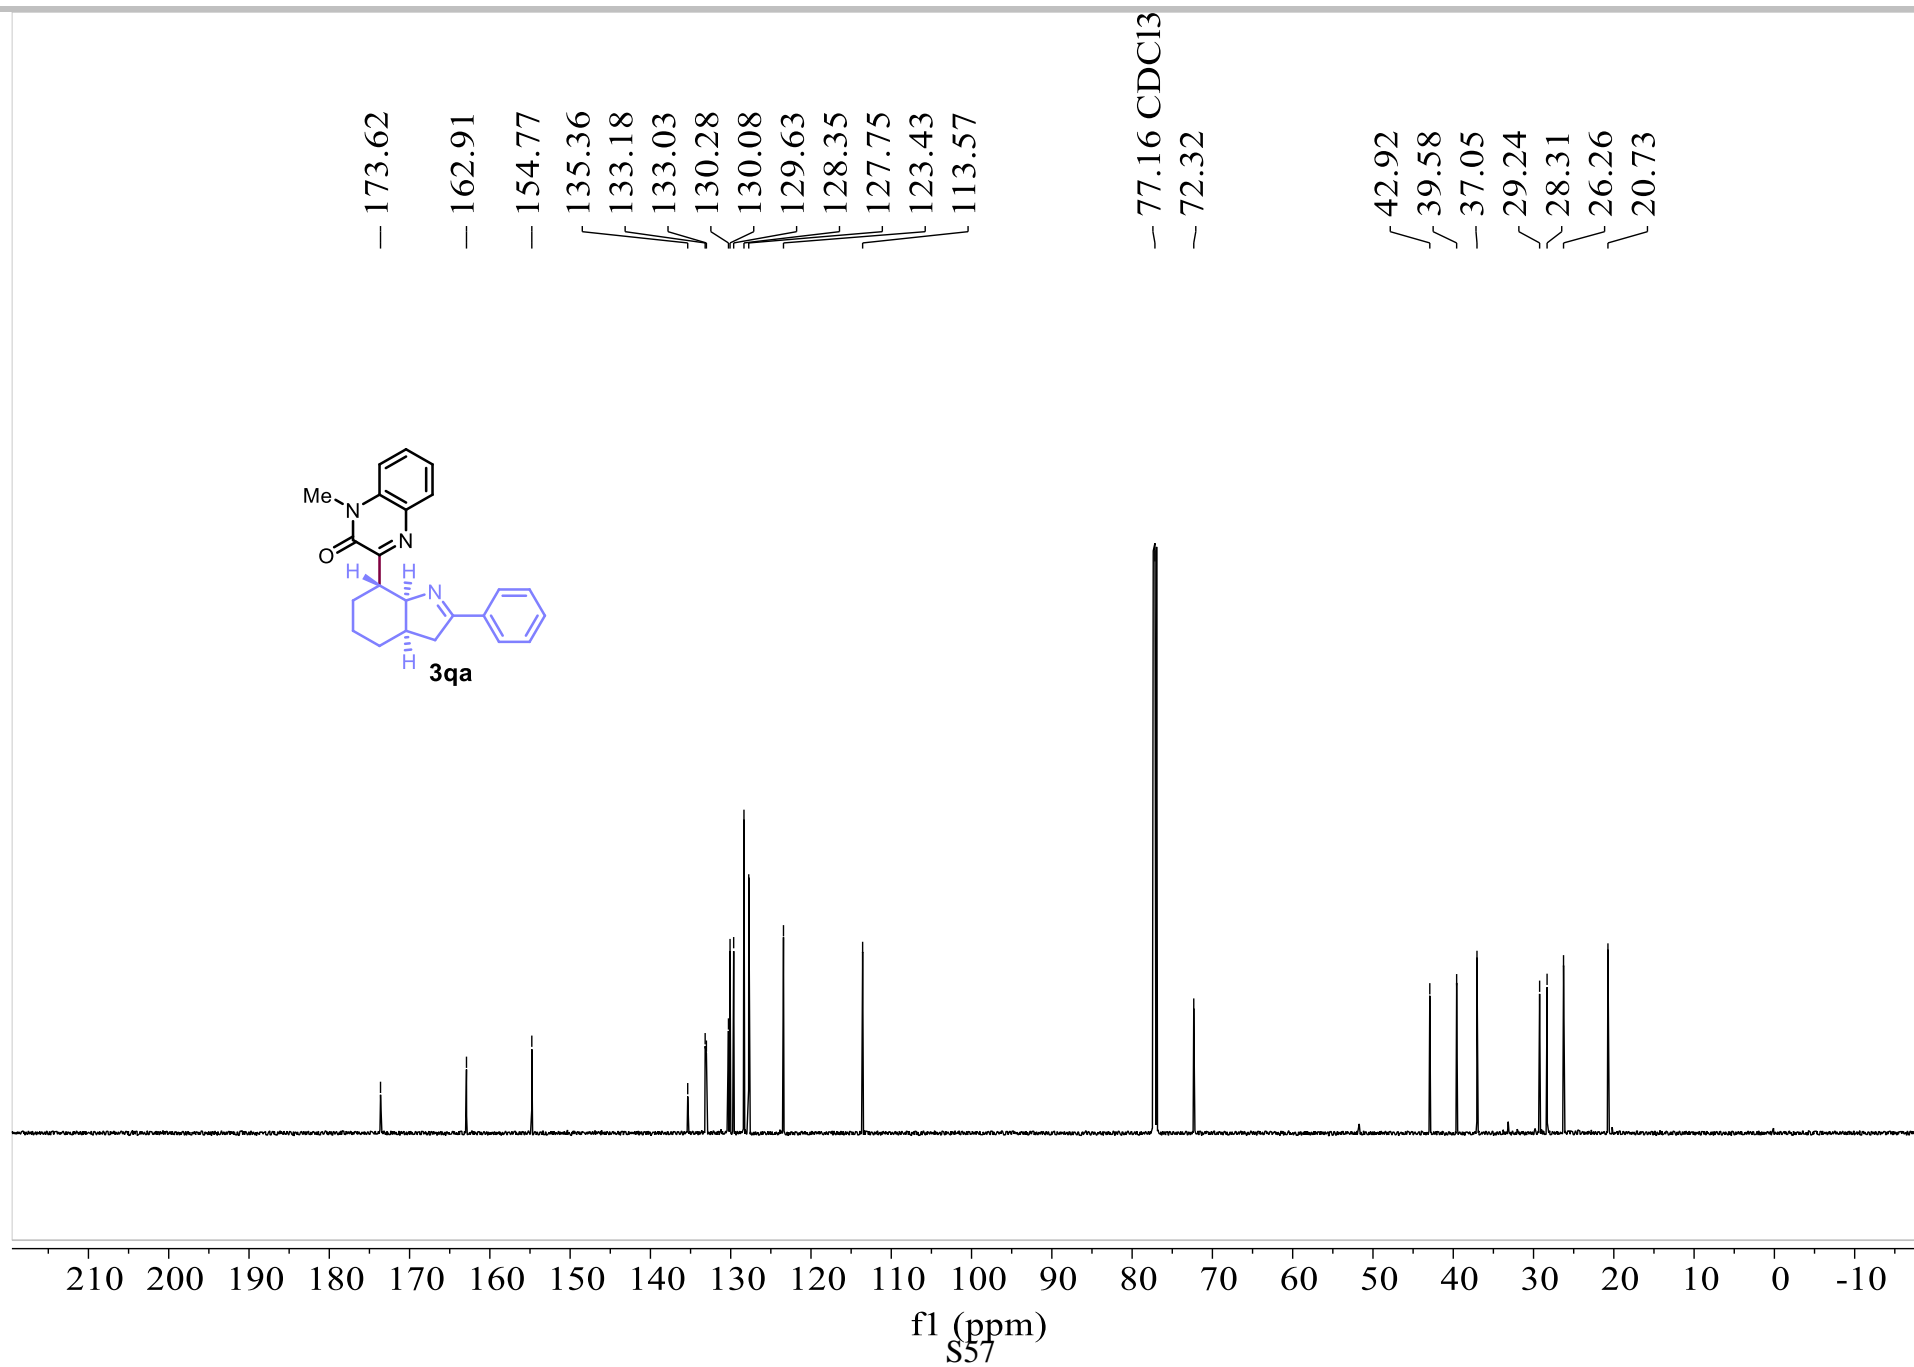

SUPPLEMENTARY INFORMATION

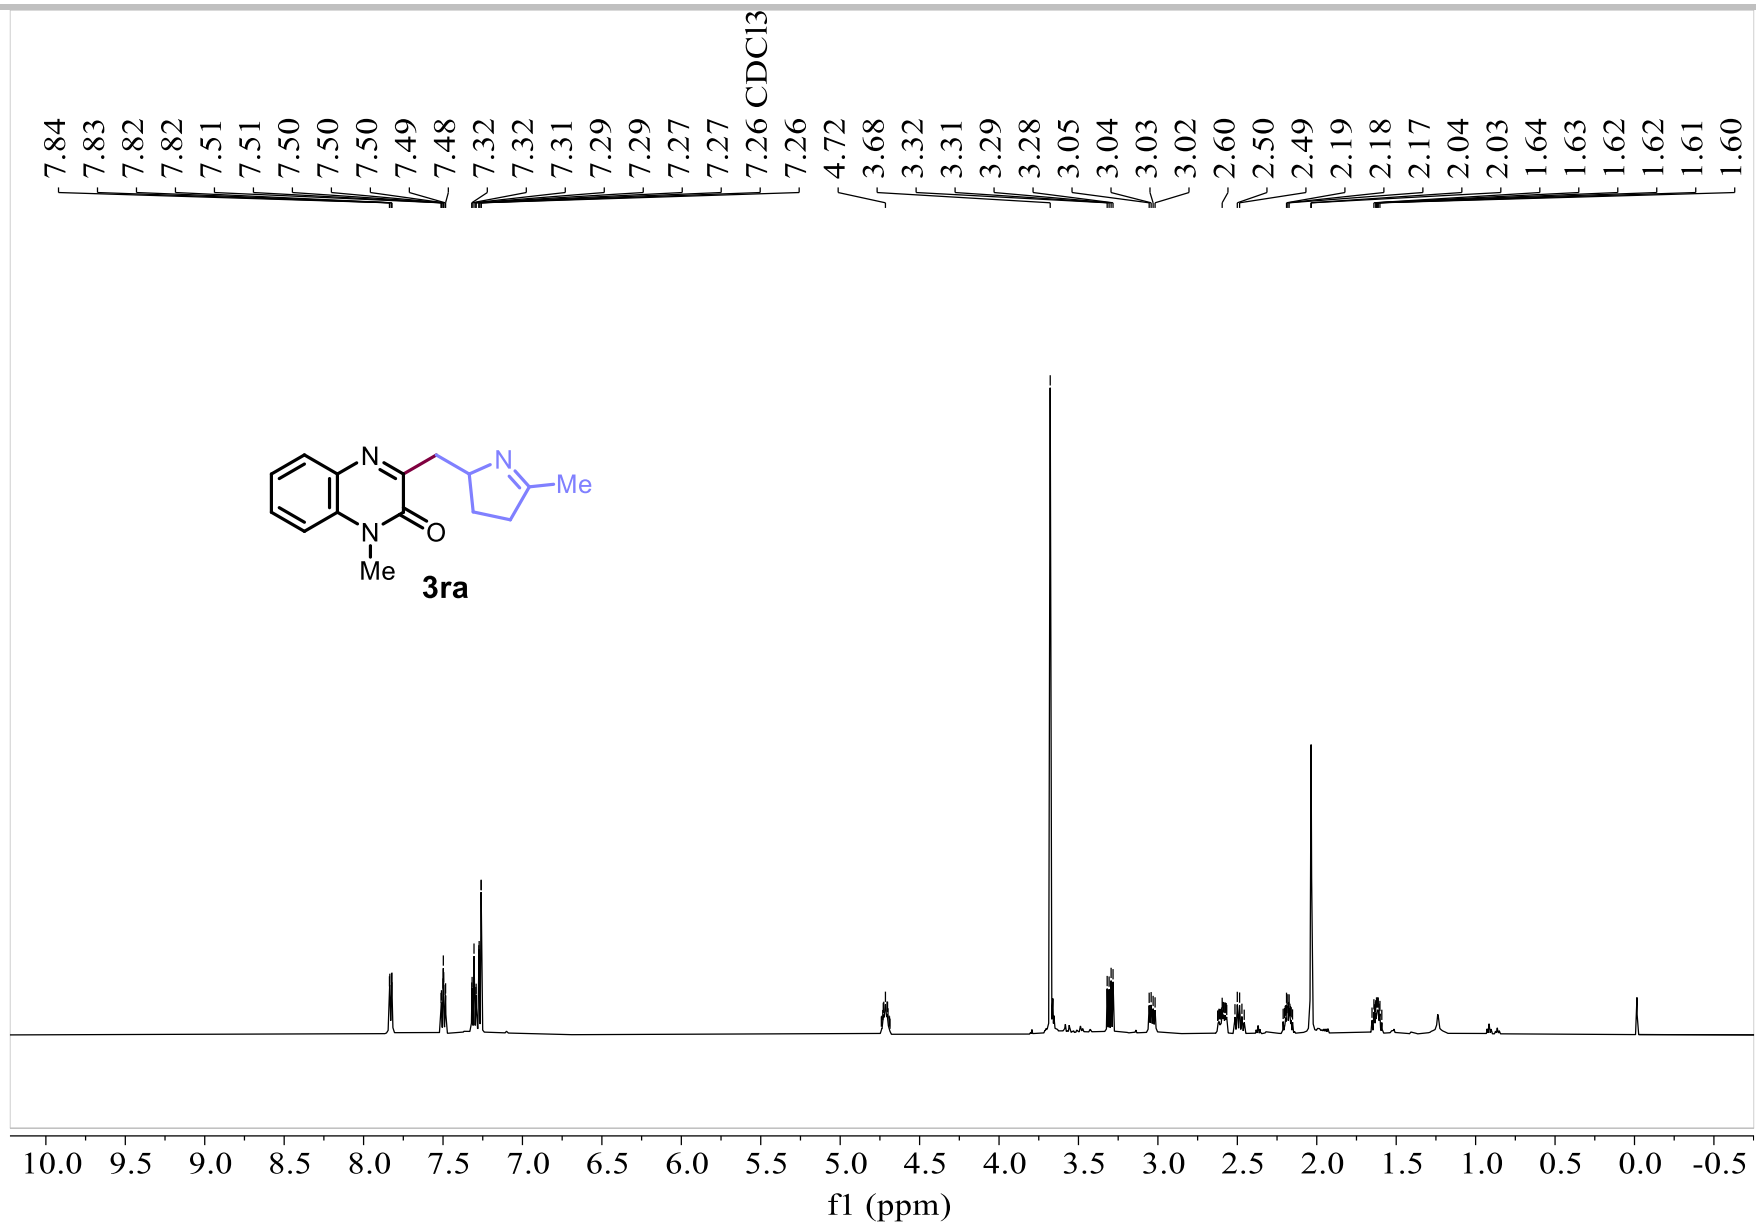

SUPPLEMENTARY INFORMATION

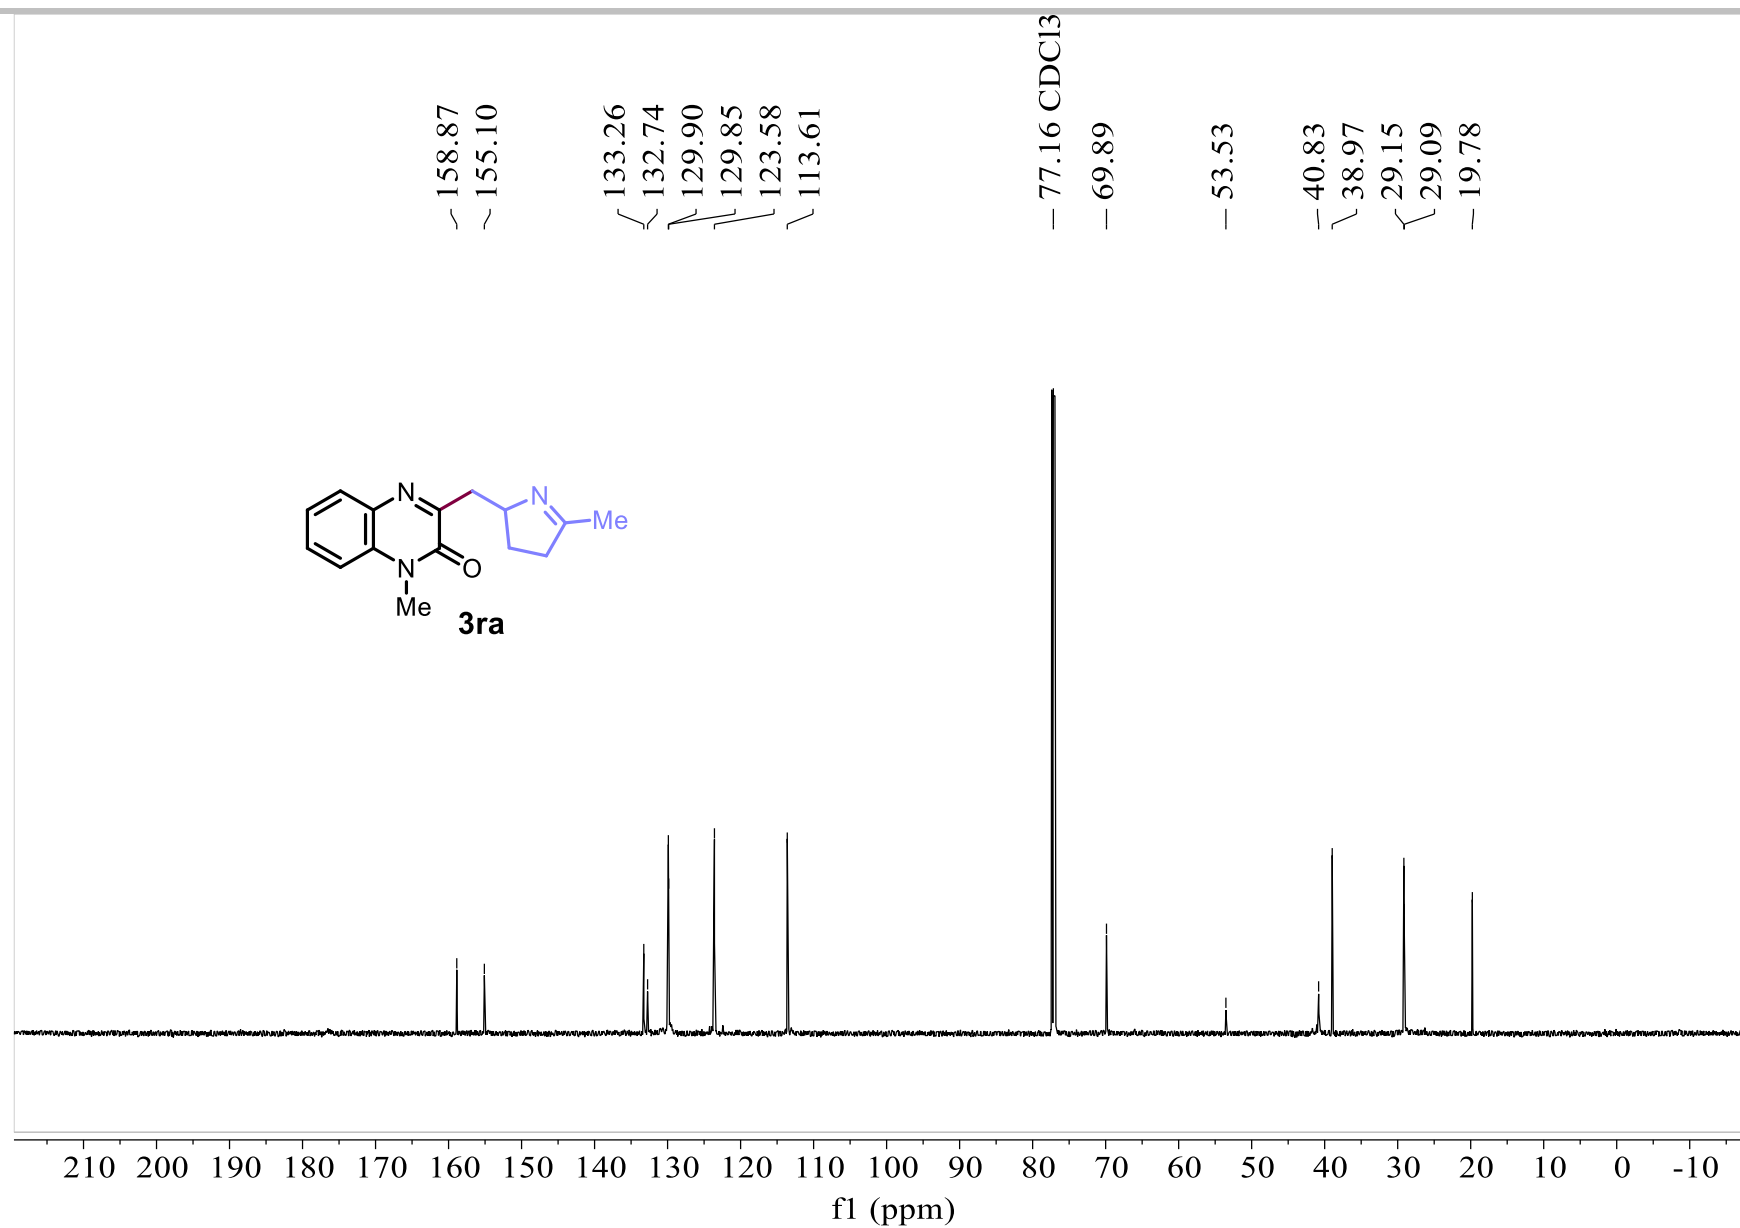

SUPPLEMENTARY INFORMATION

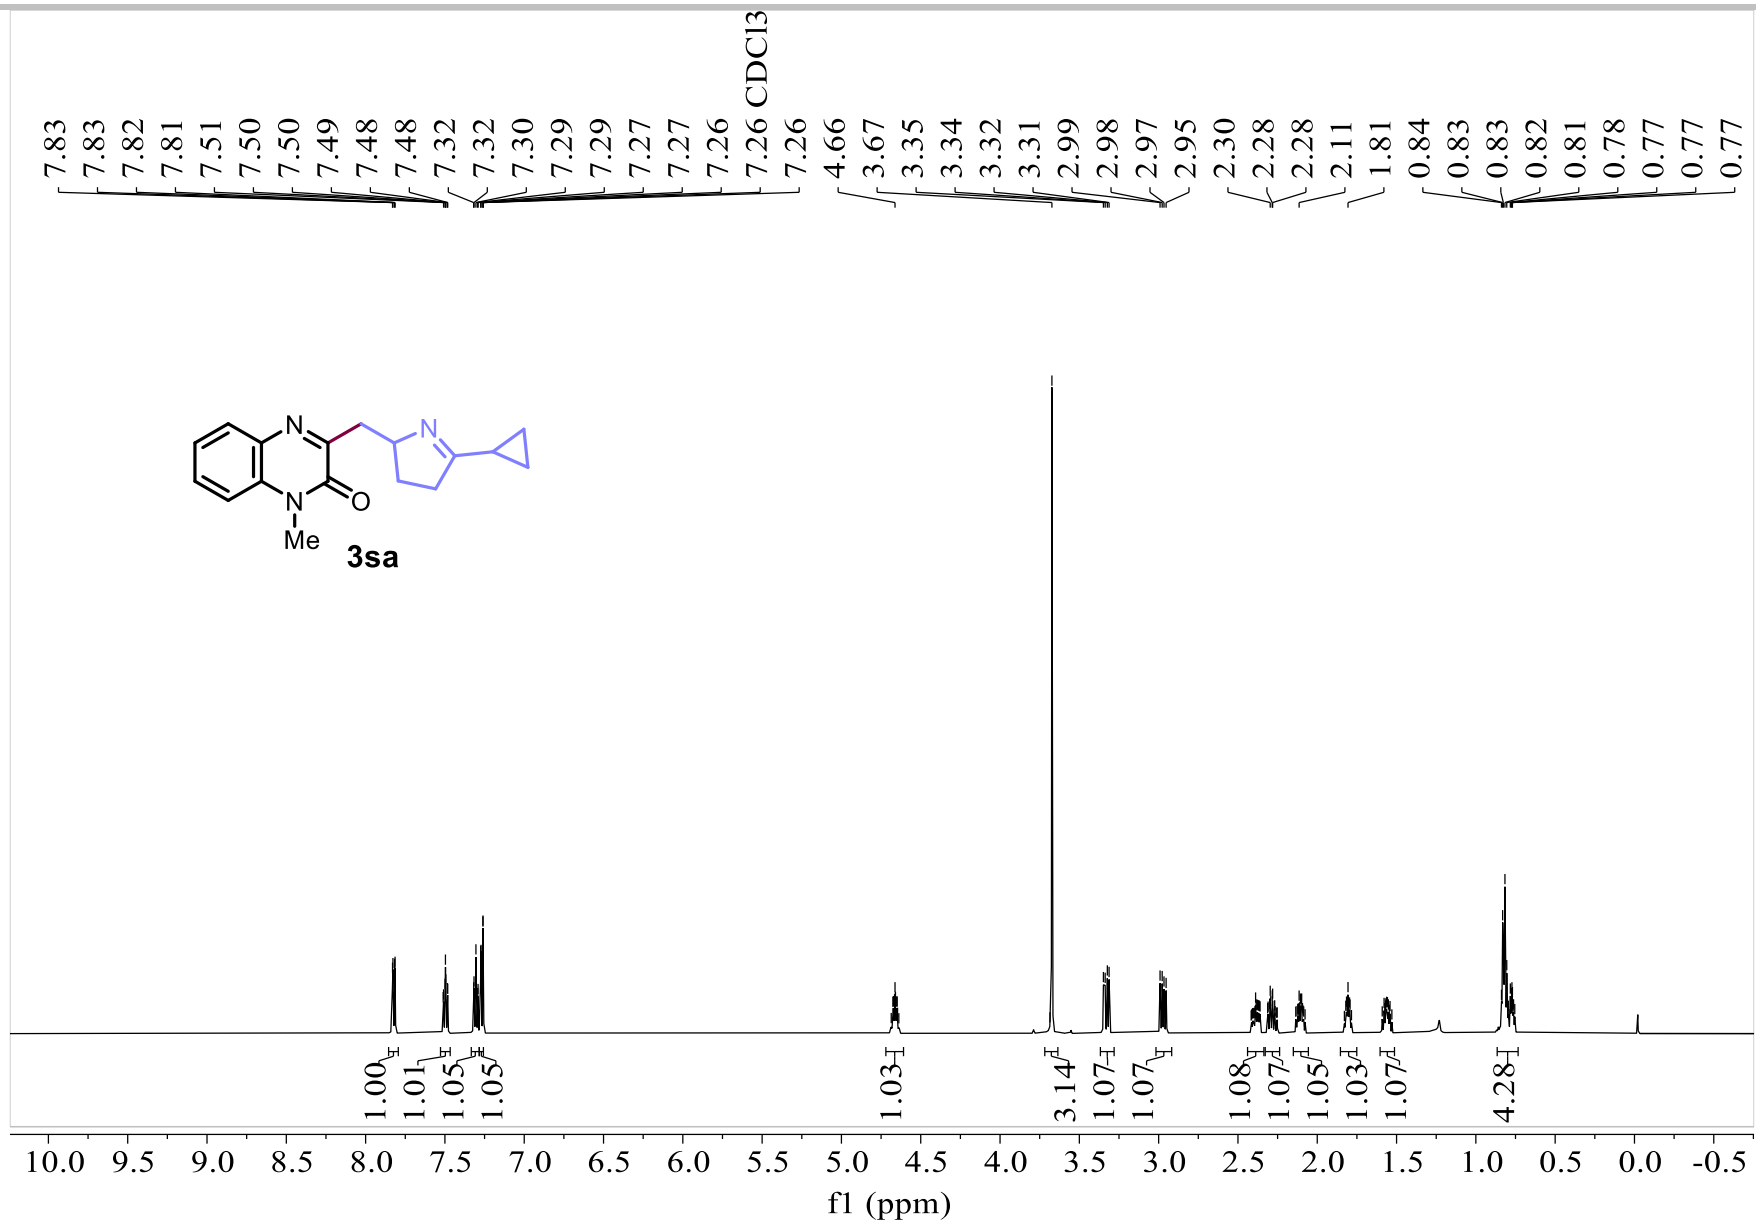

SUPPLEMENTARY INFORMATION

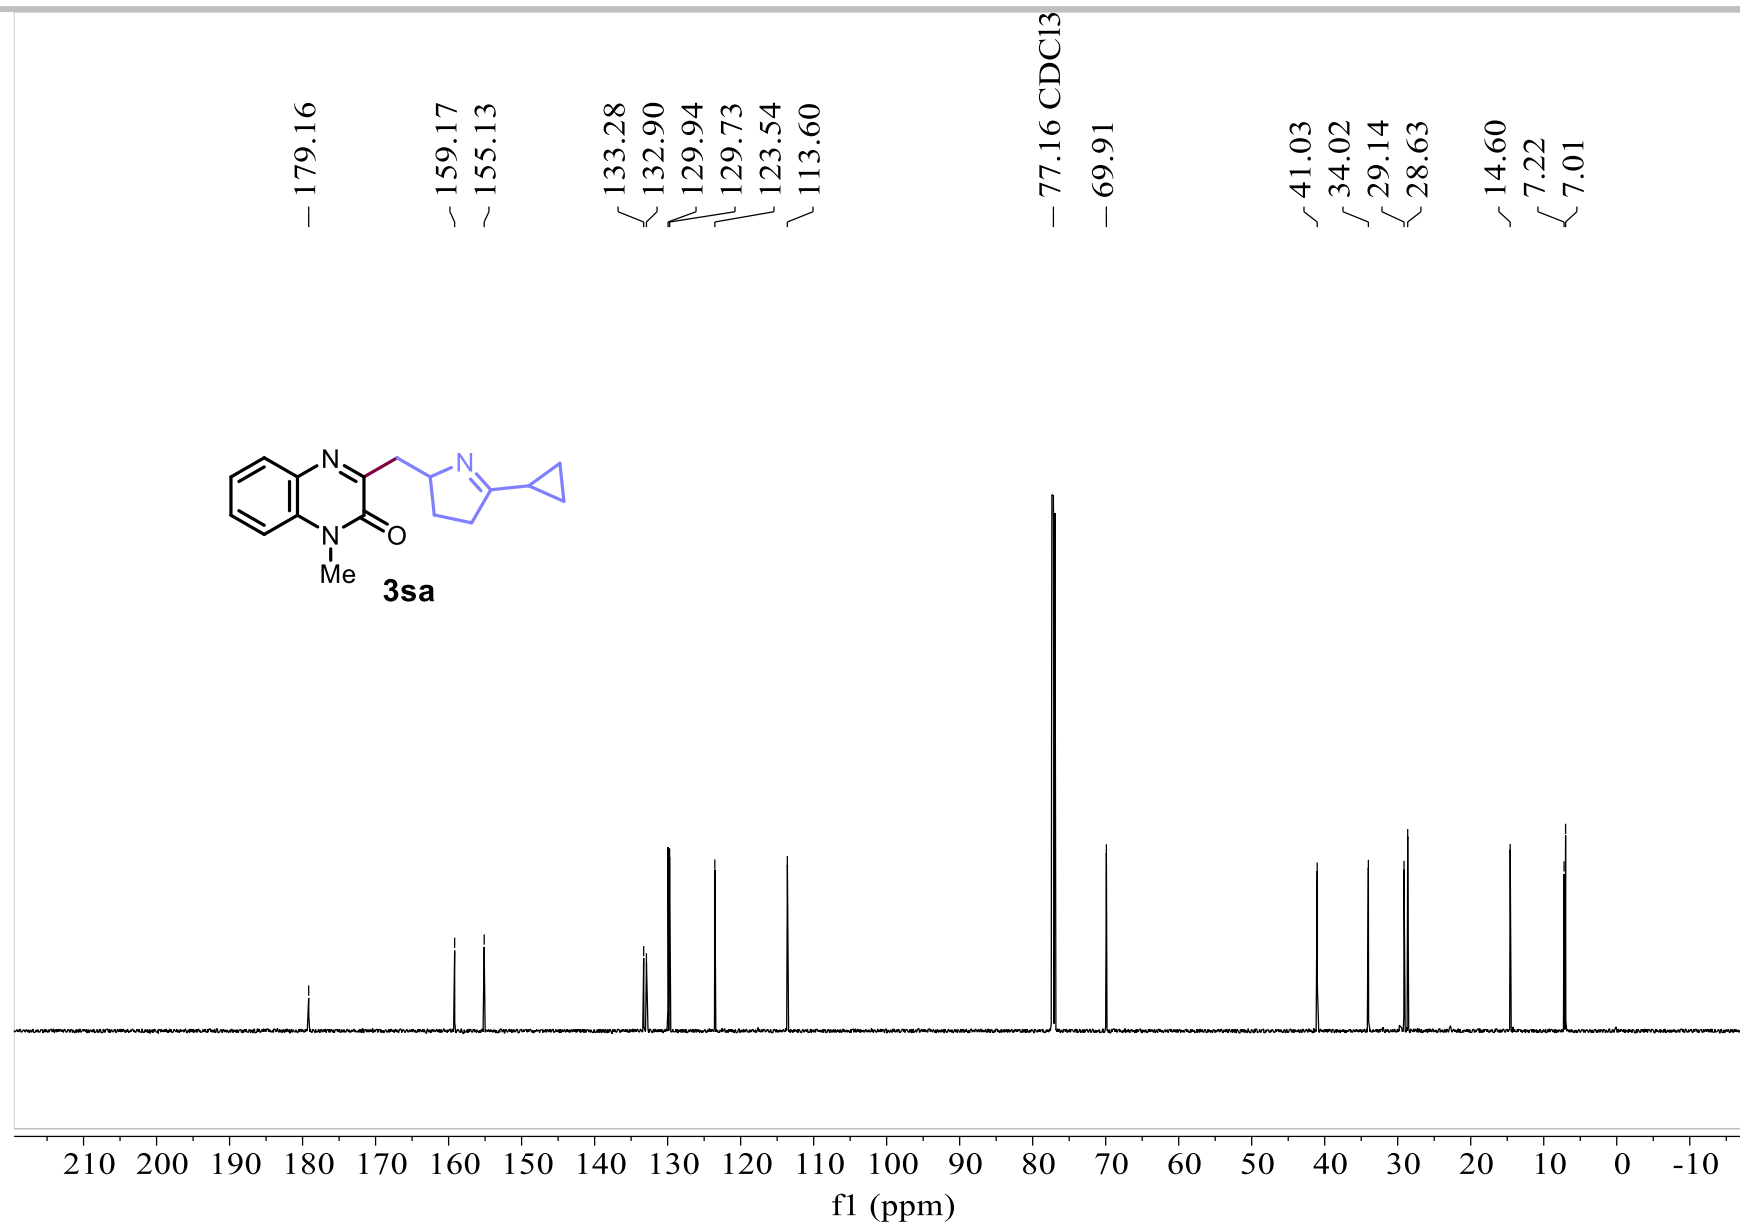

SUPPLEMENTARY INFORMATION

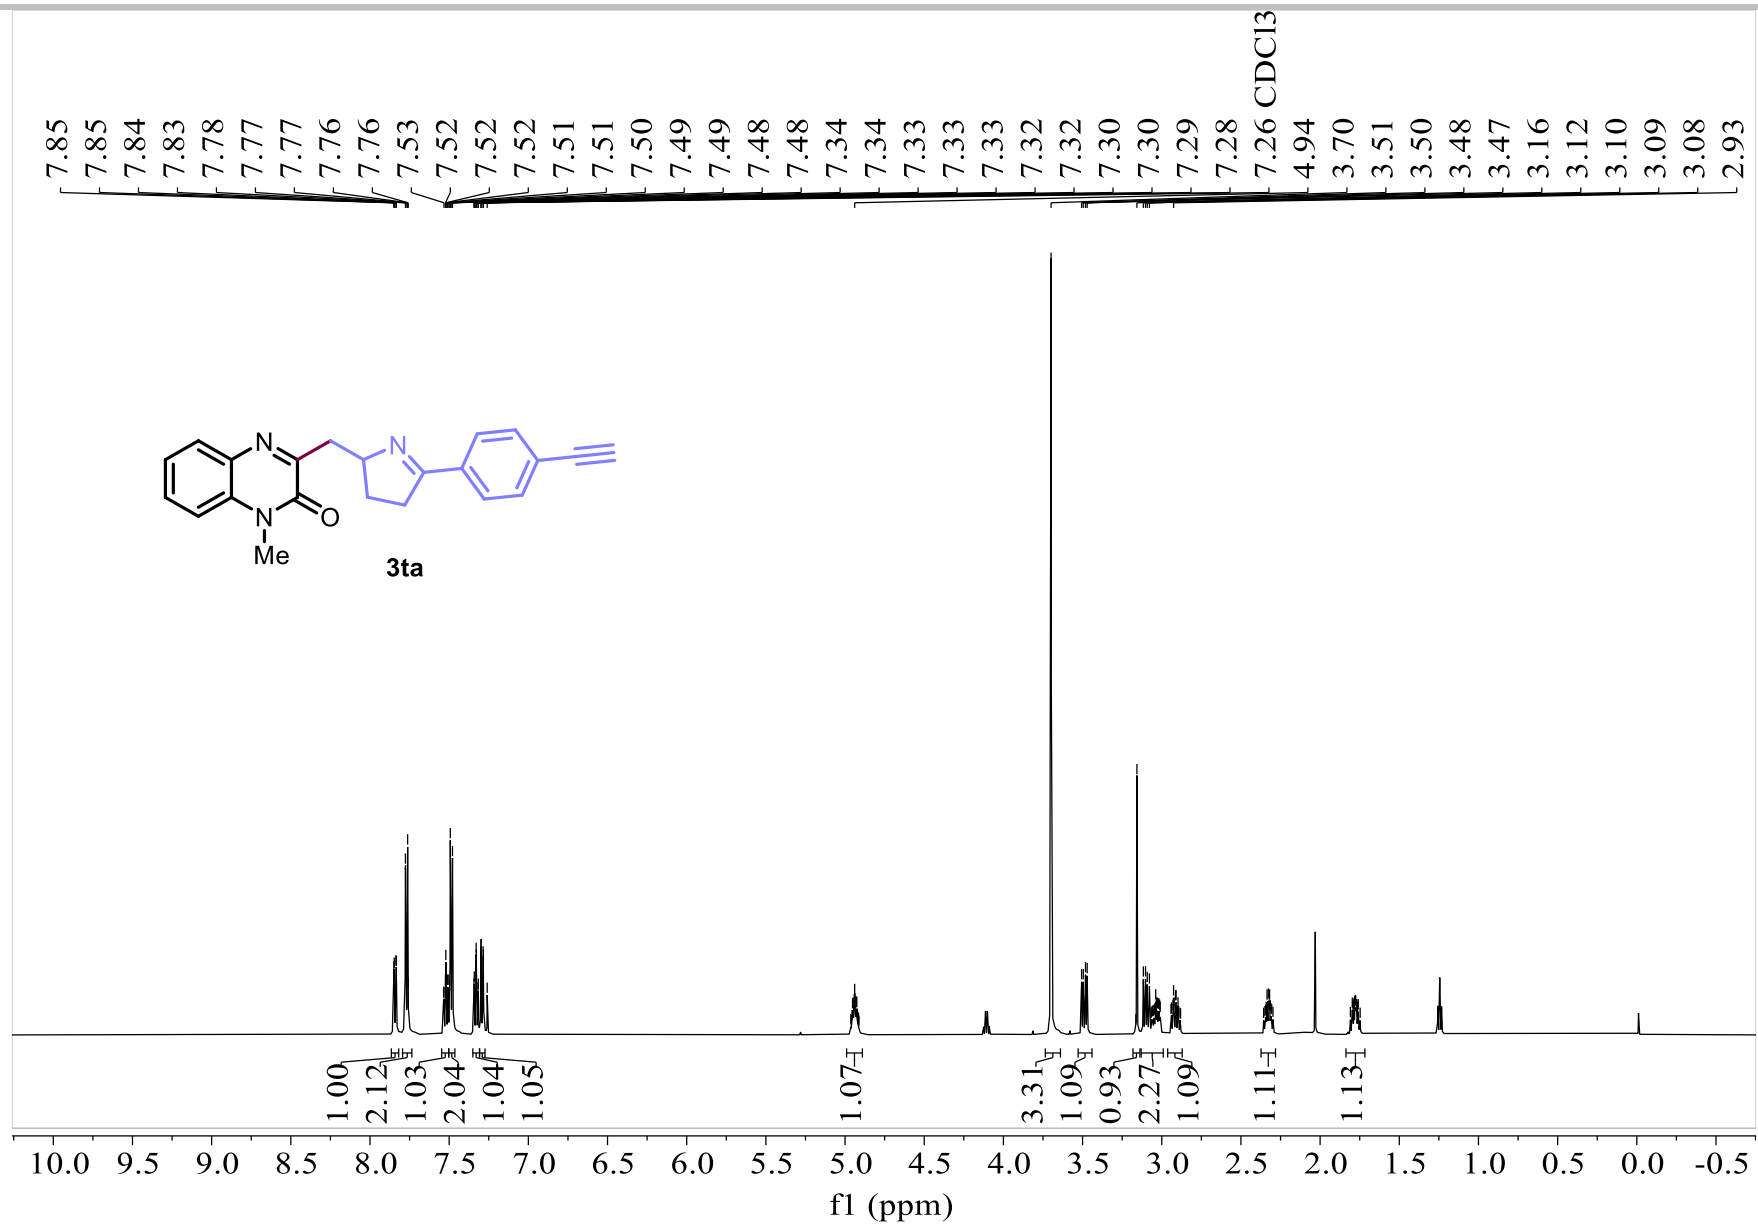

SUPPLEMENTARY INFORMATION

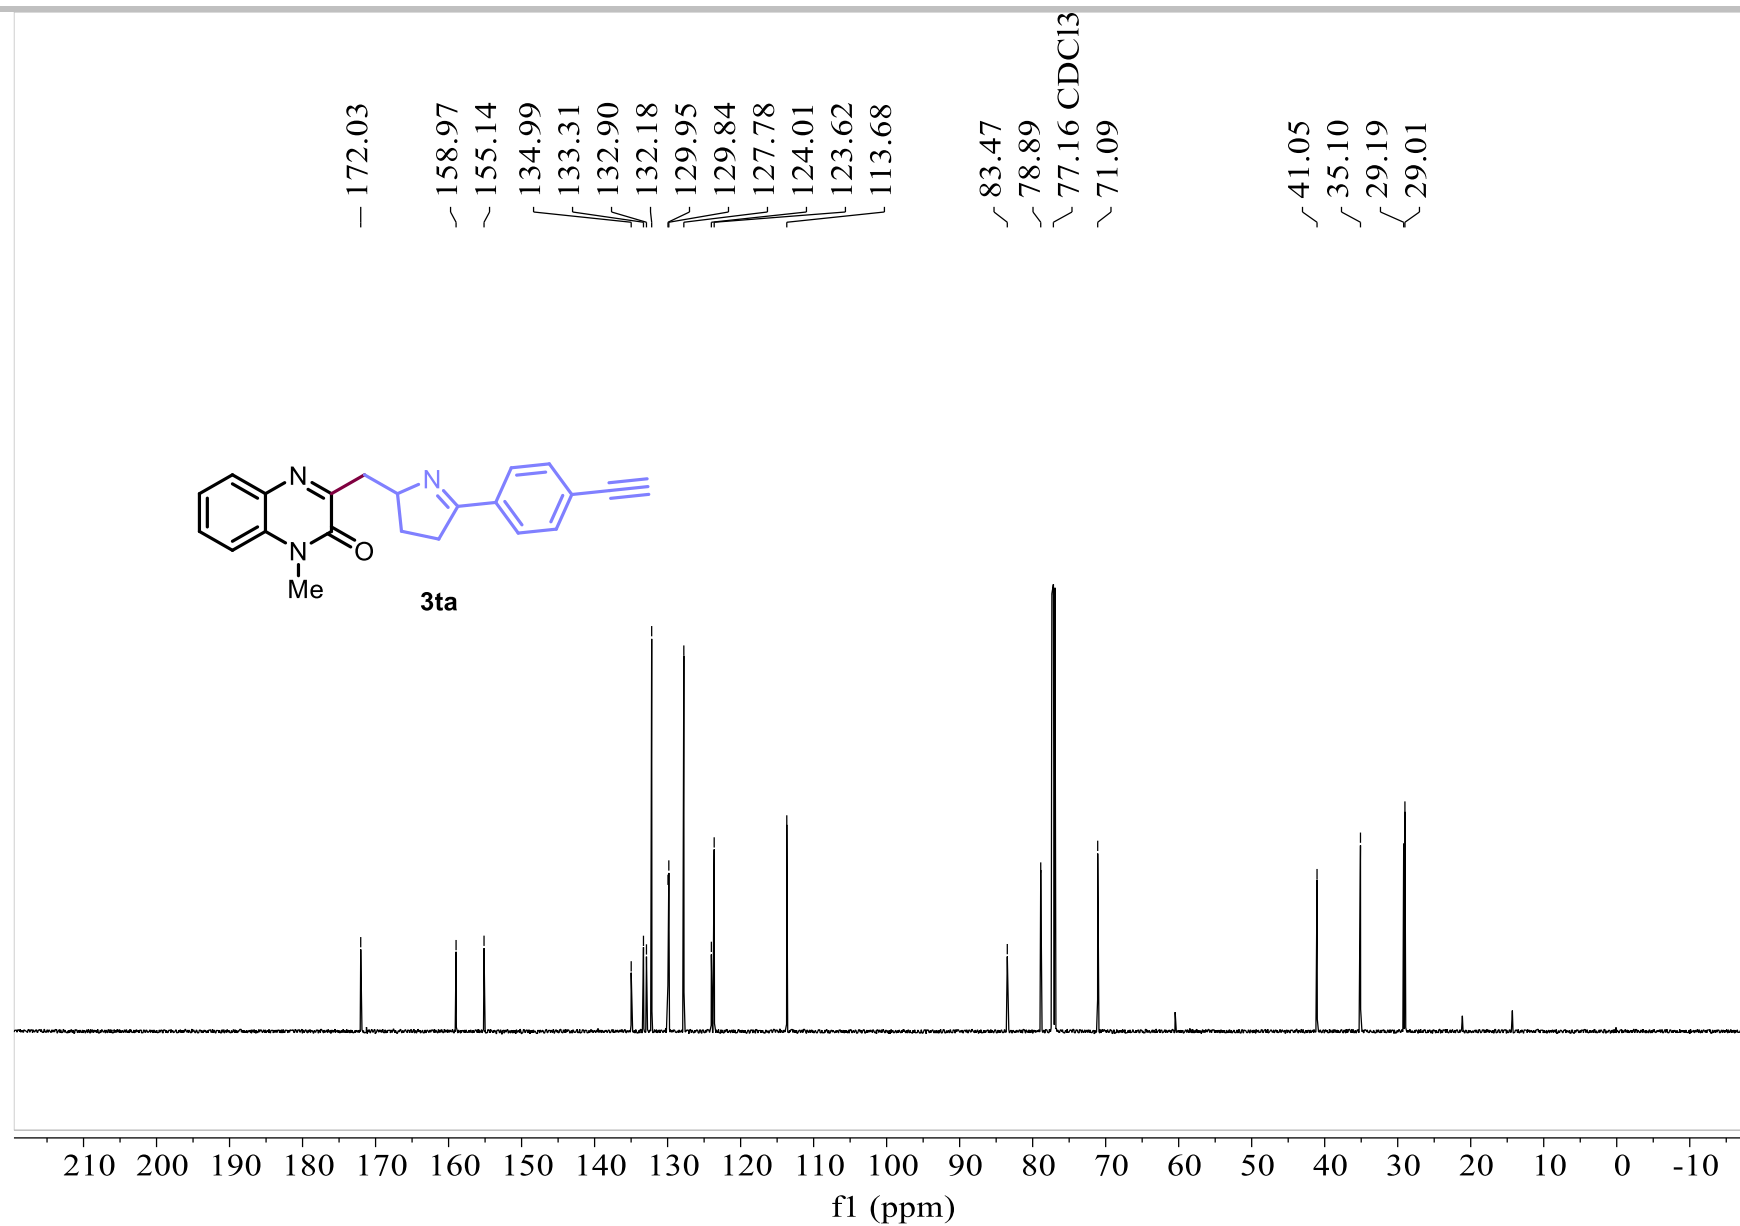

SUPPLEMENTARY INFORMATION

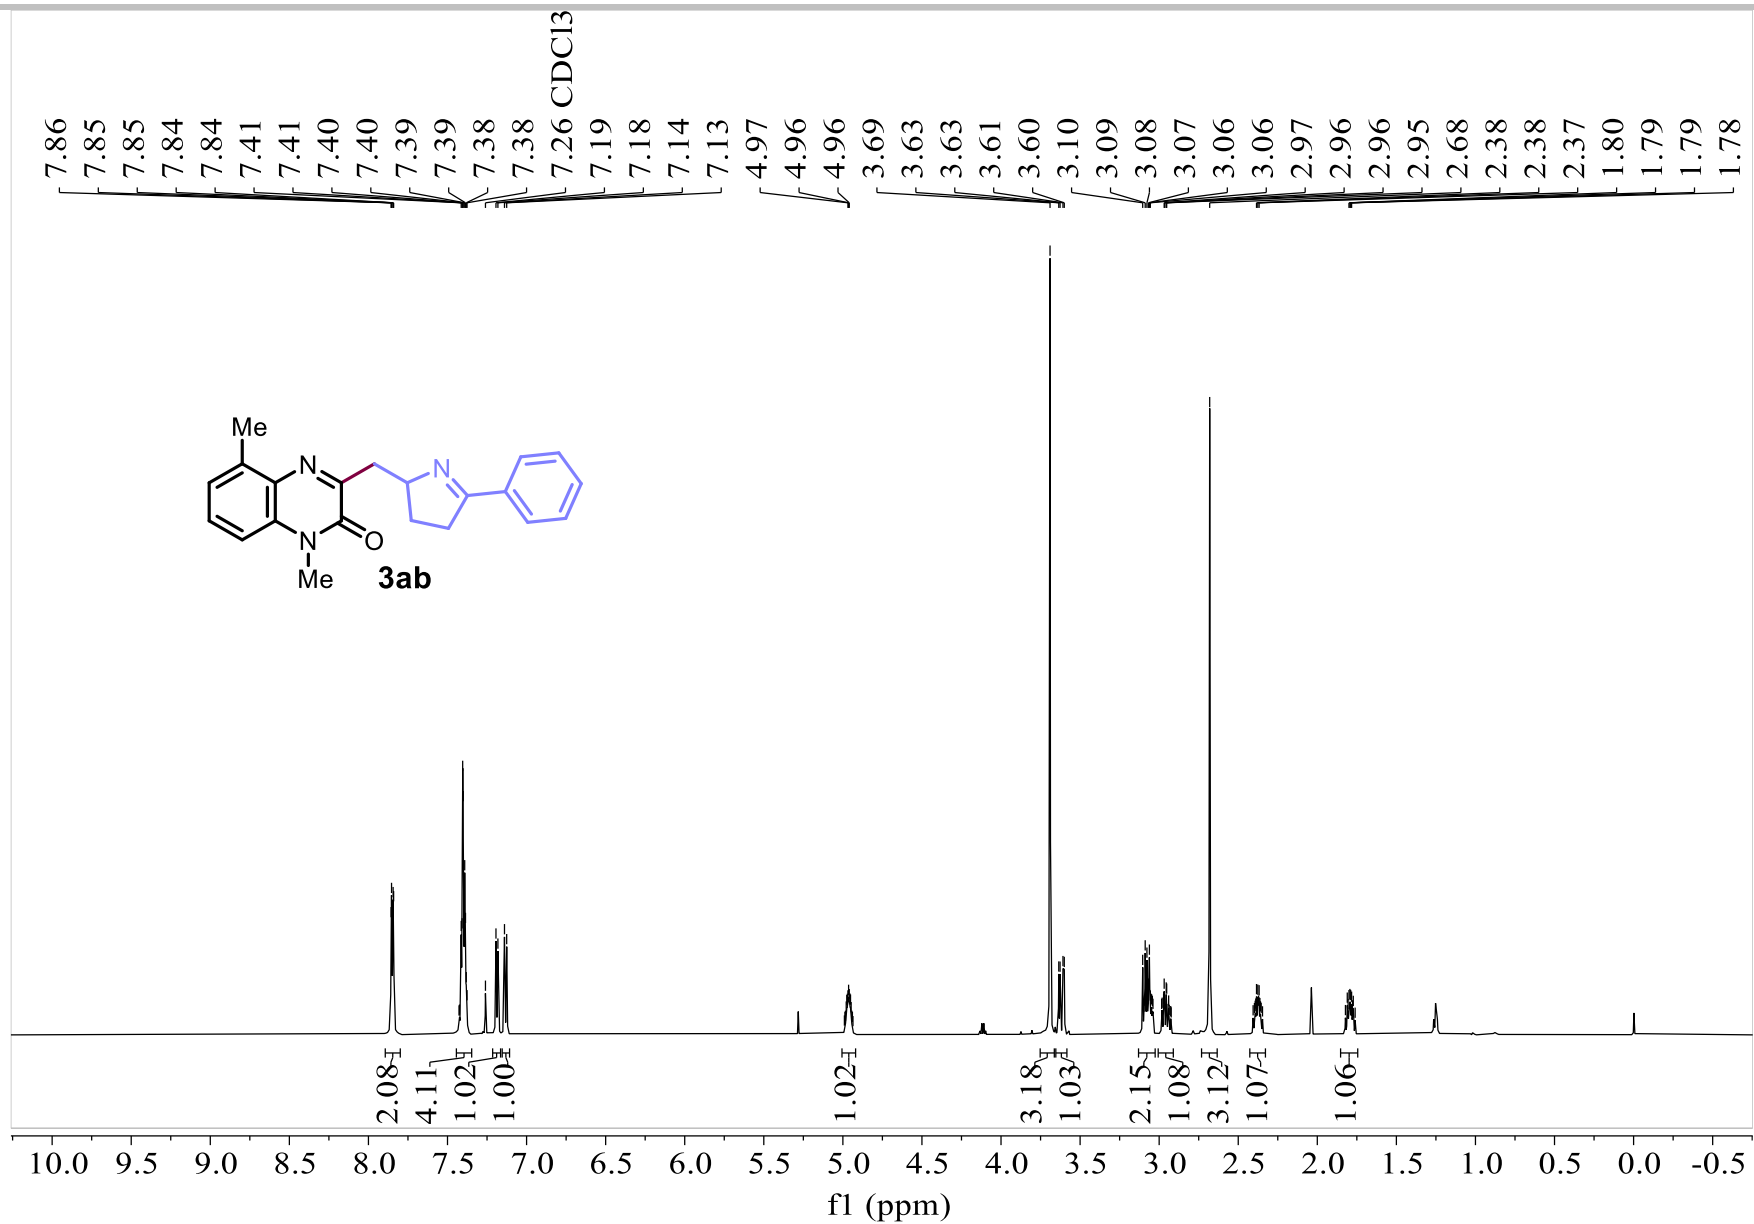



SUPPLEMENTARY INFORMATION

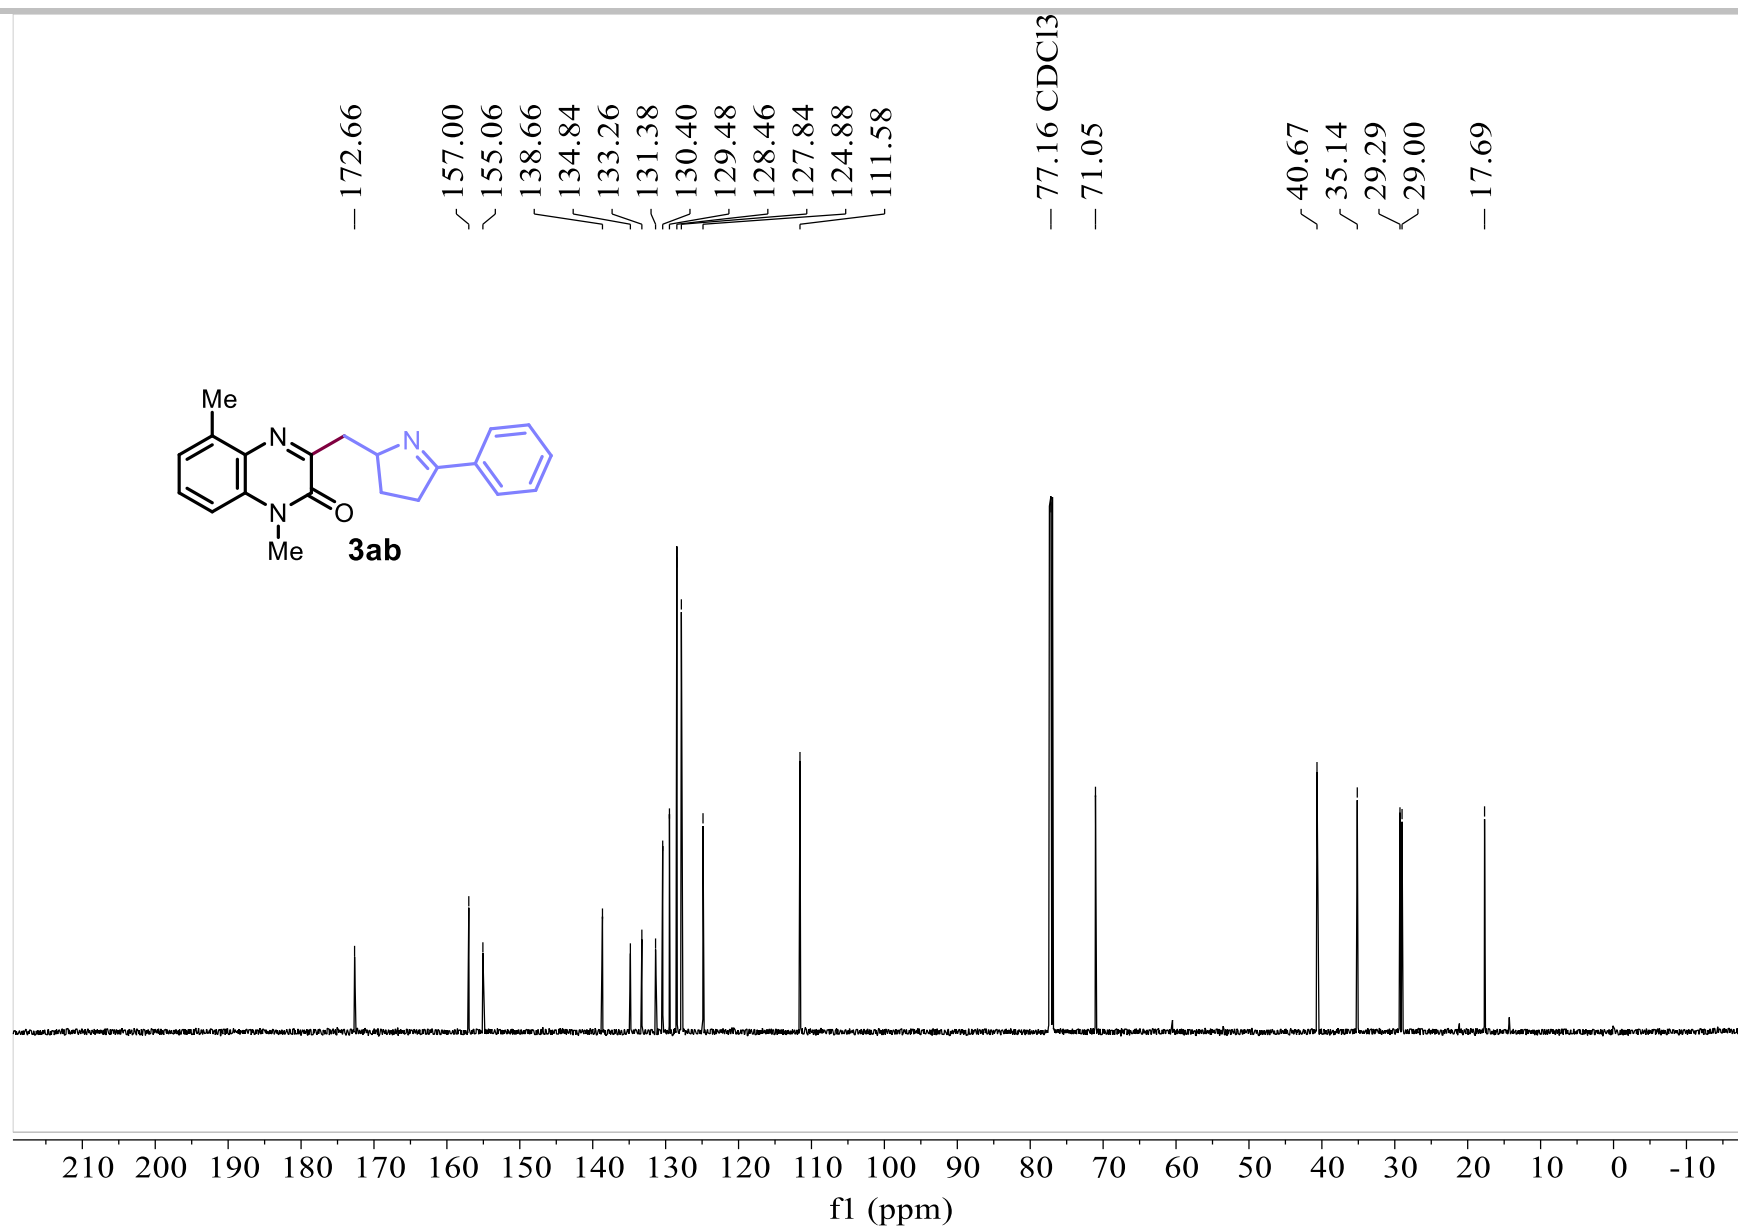

SUPPLEMENTARY INFORMATION

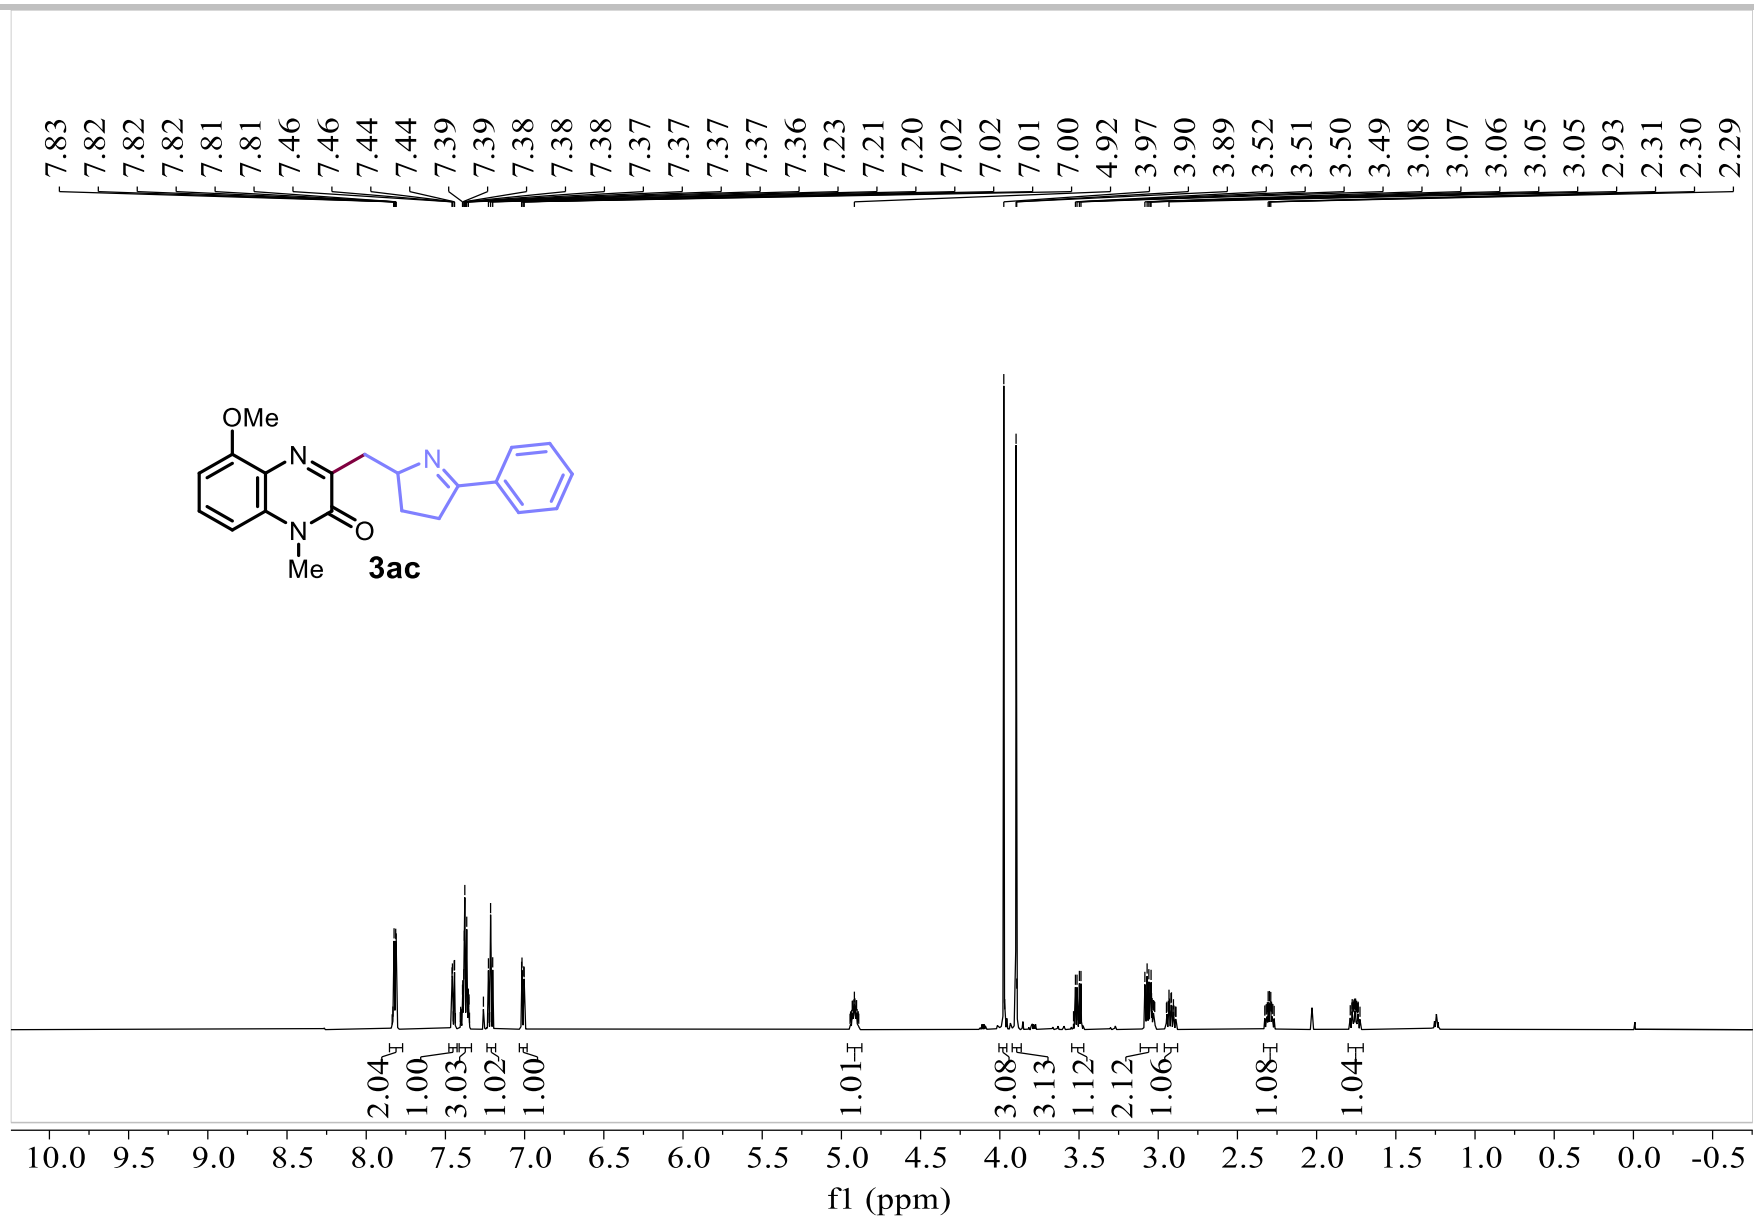

SUPPLEMENTARY INFORMATION

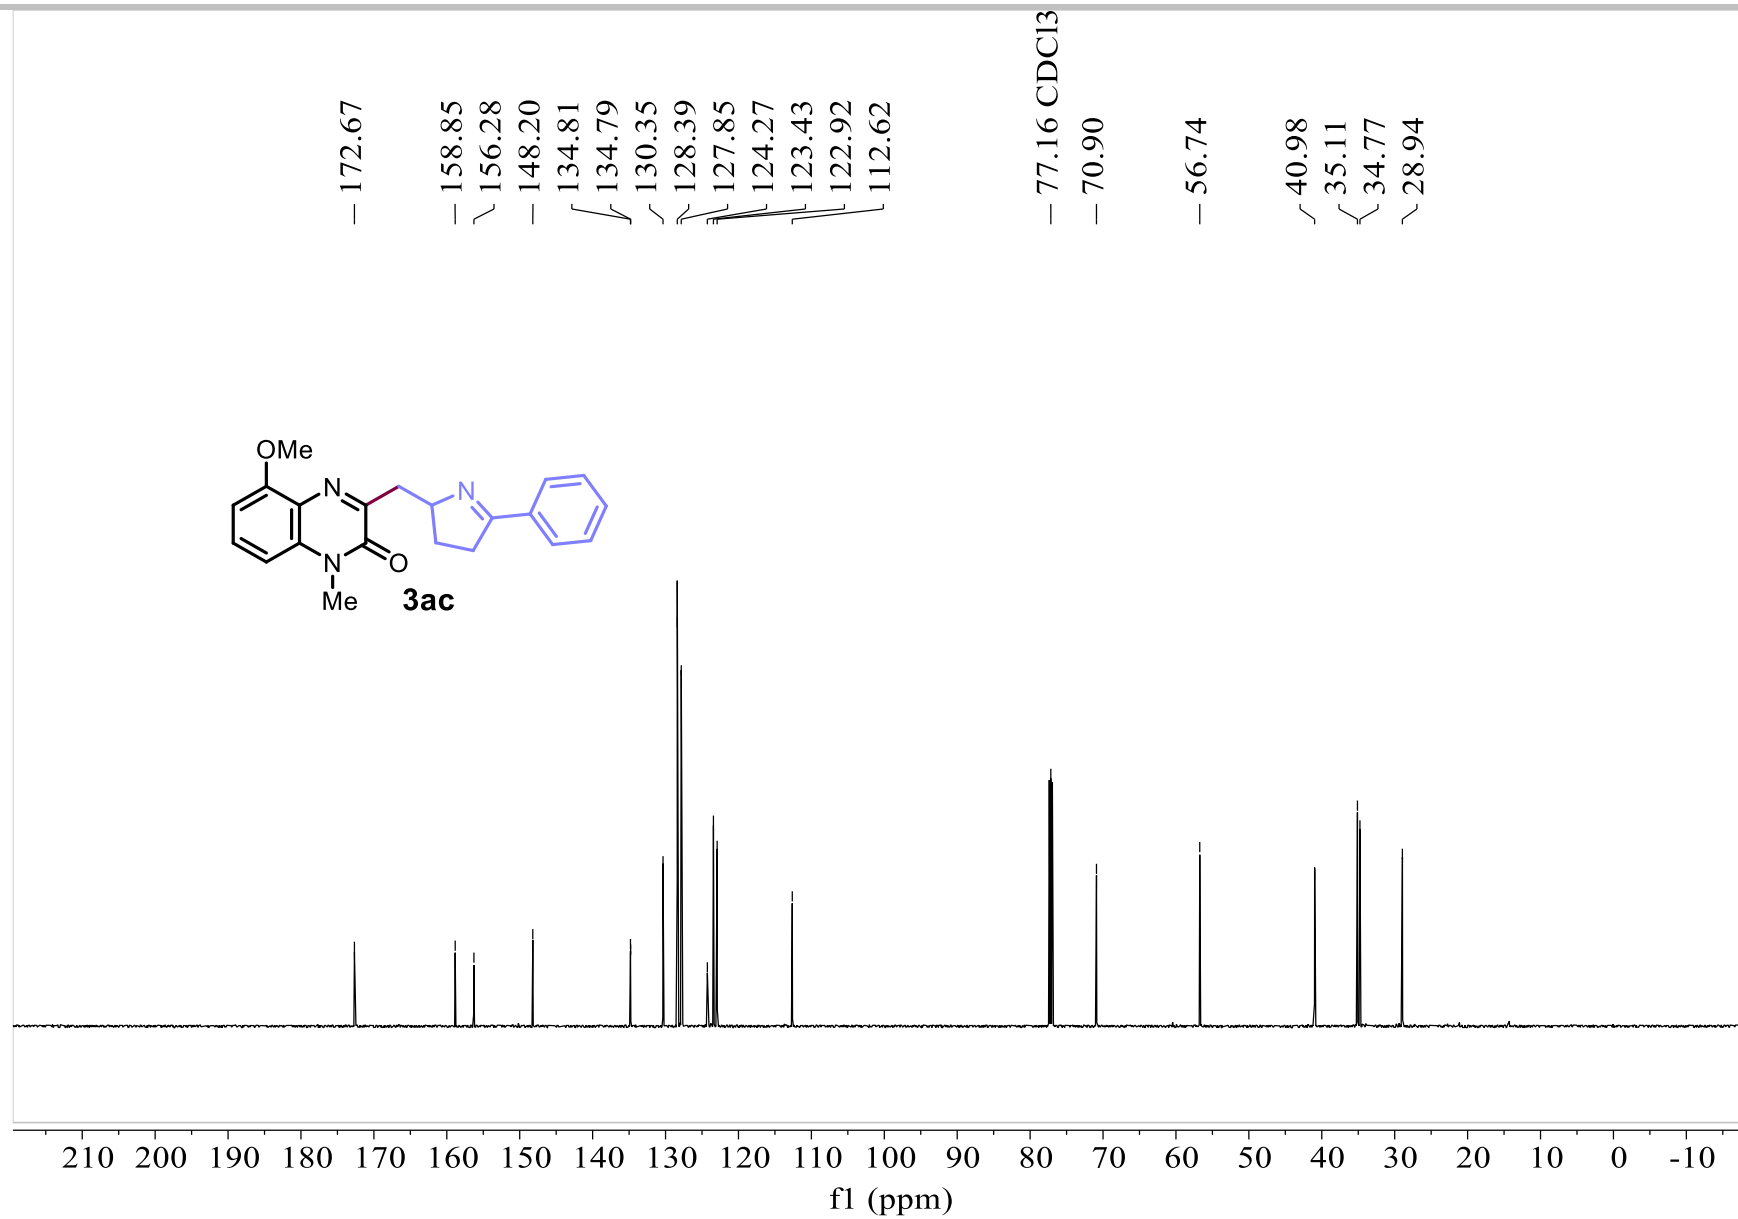

SUPPLEMENTARY INFORMATION

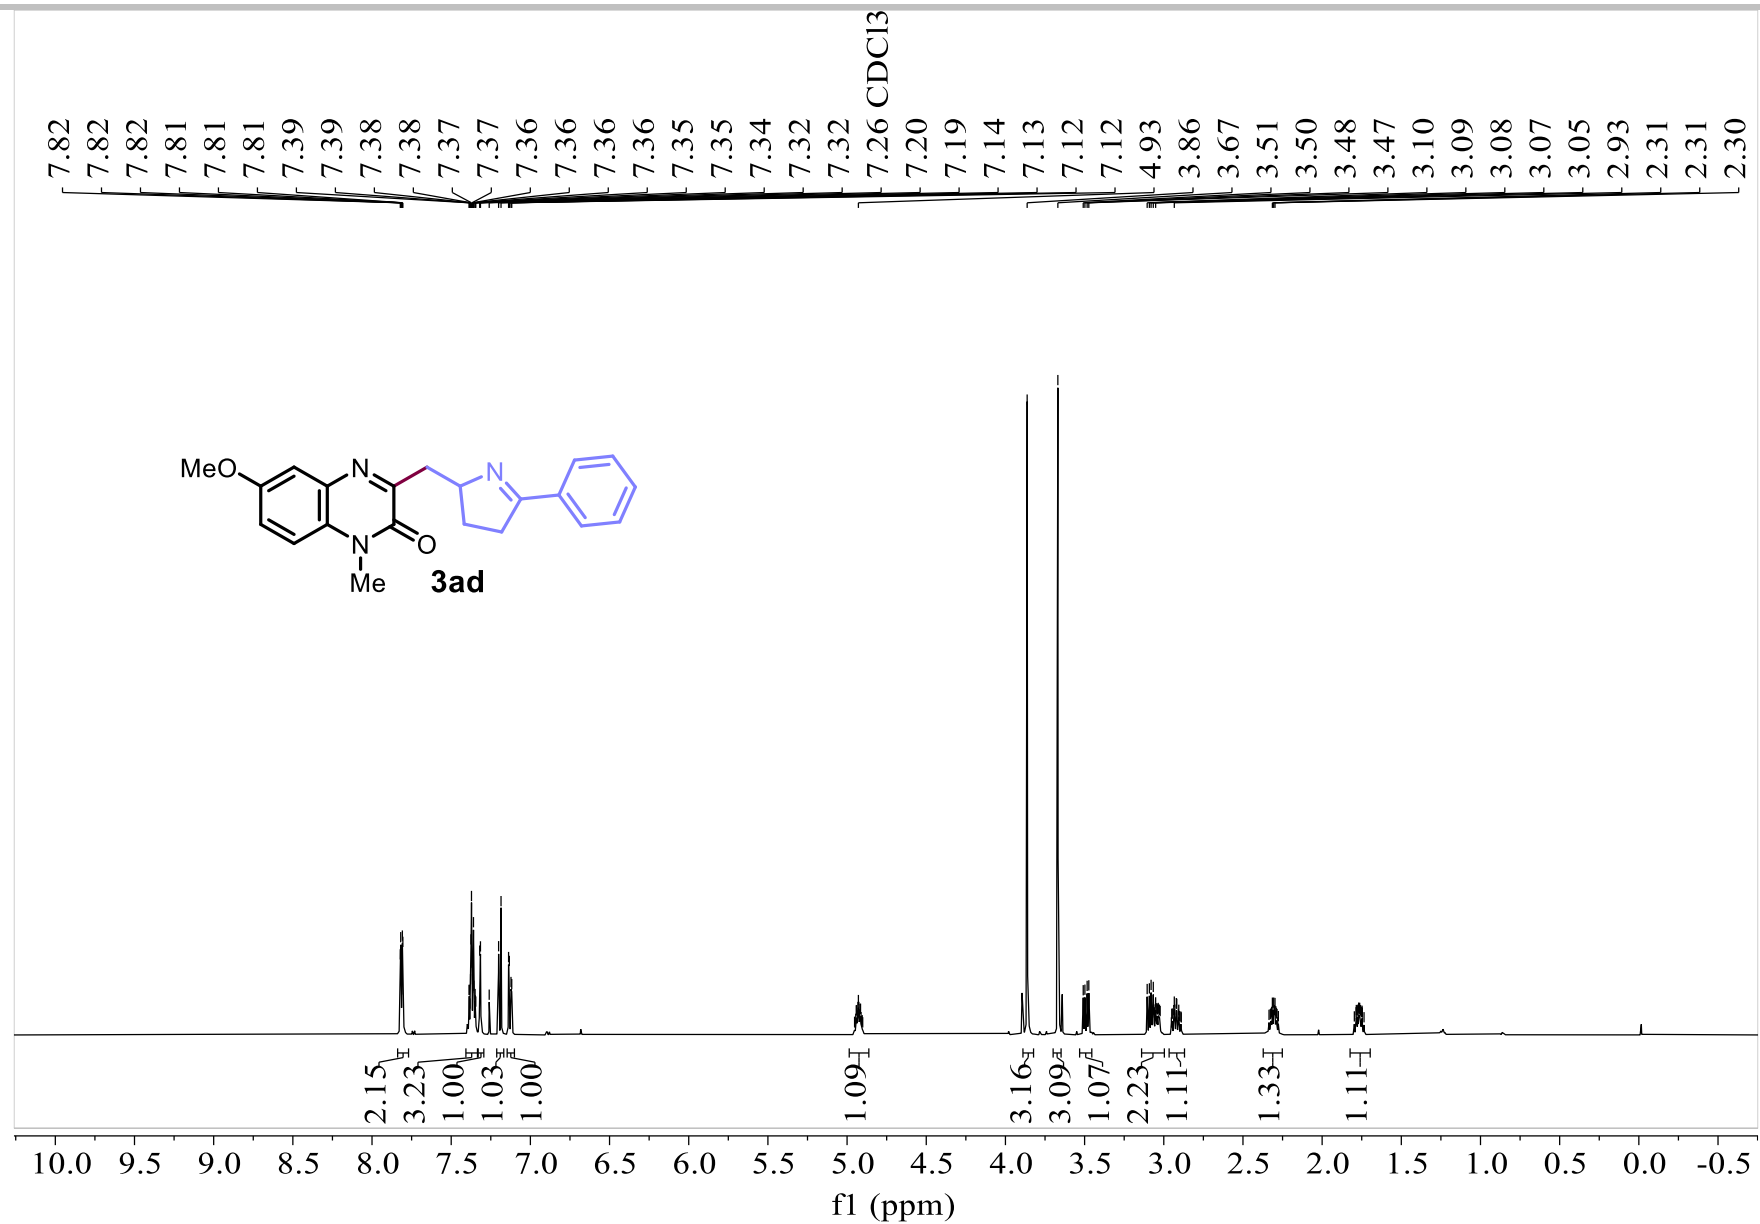

SUPPLEMENTARY INFORMATION

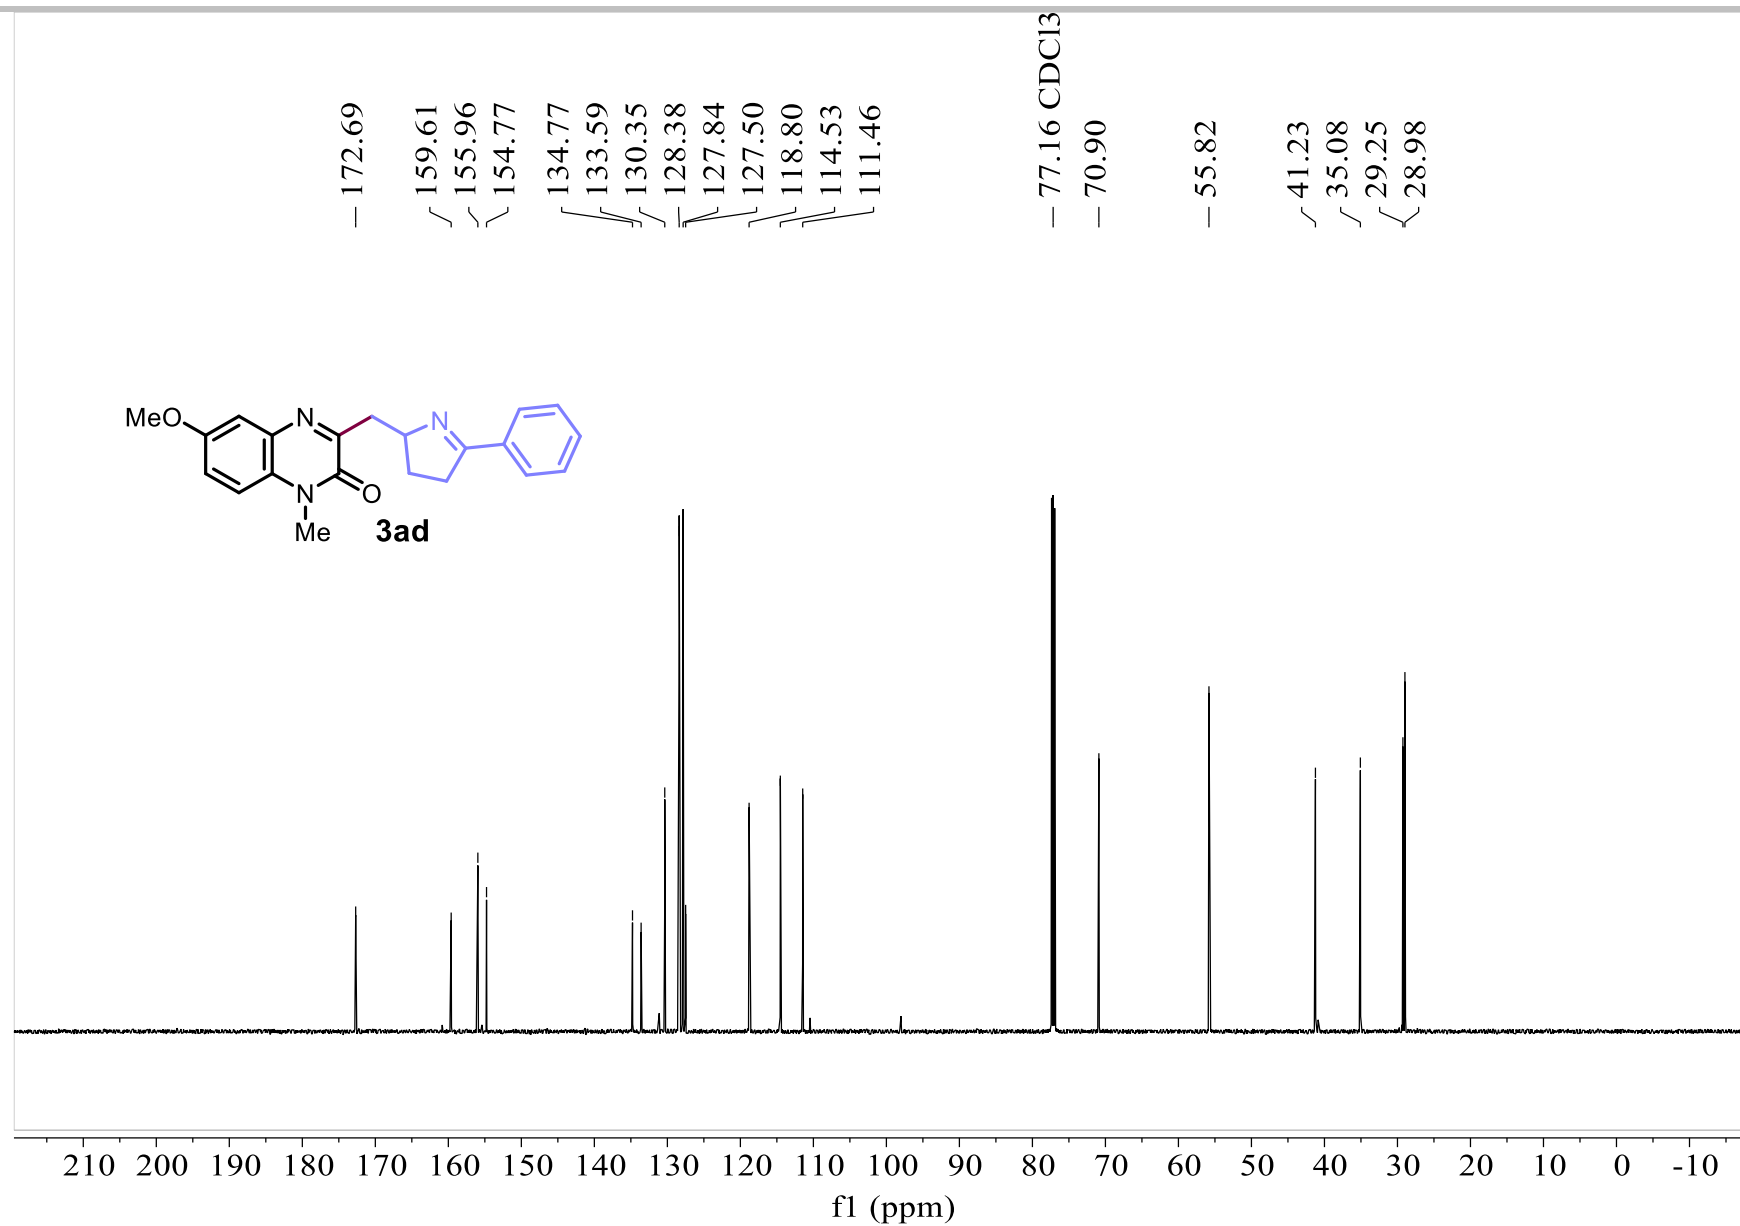

SUPPLEMENTARY INFORMATION

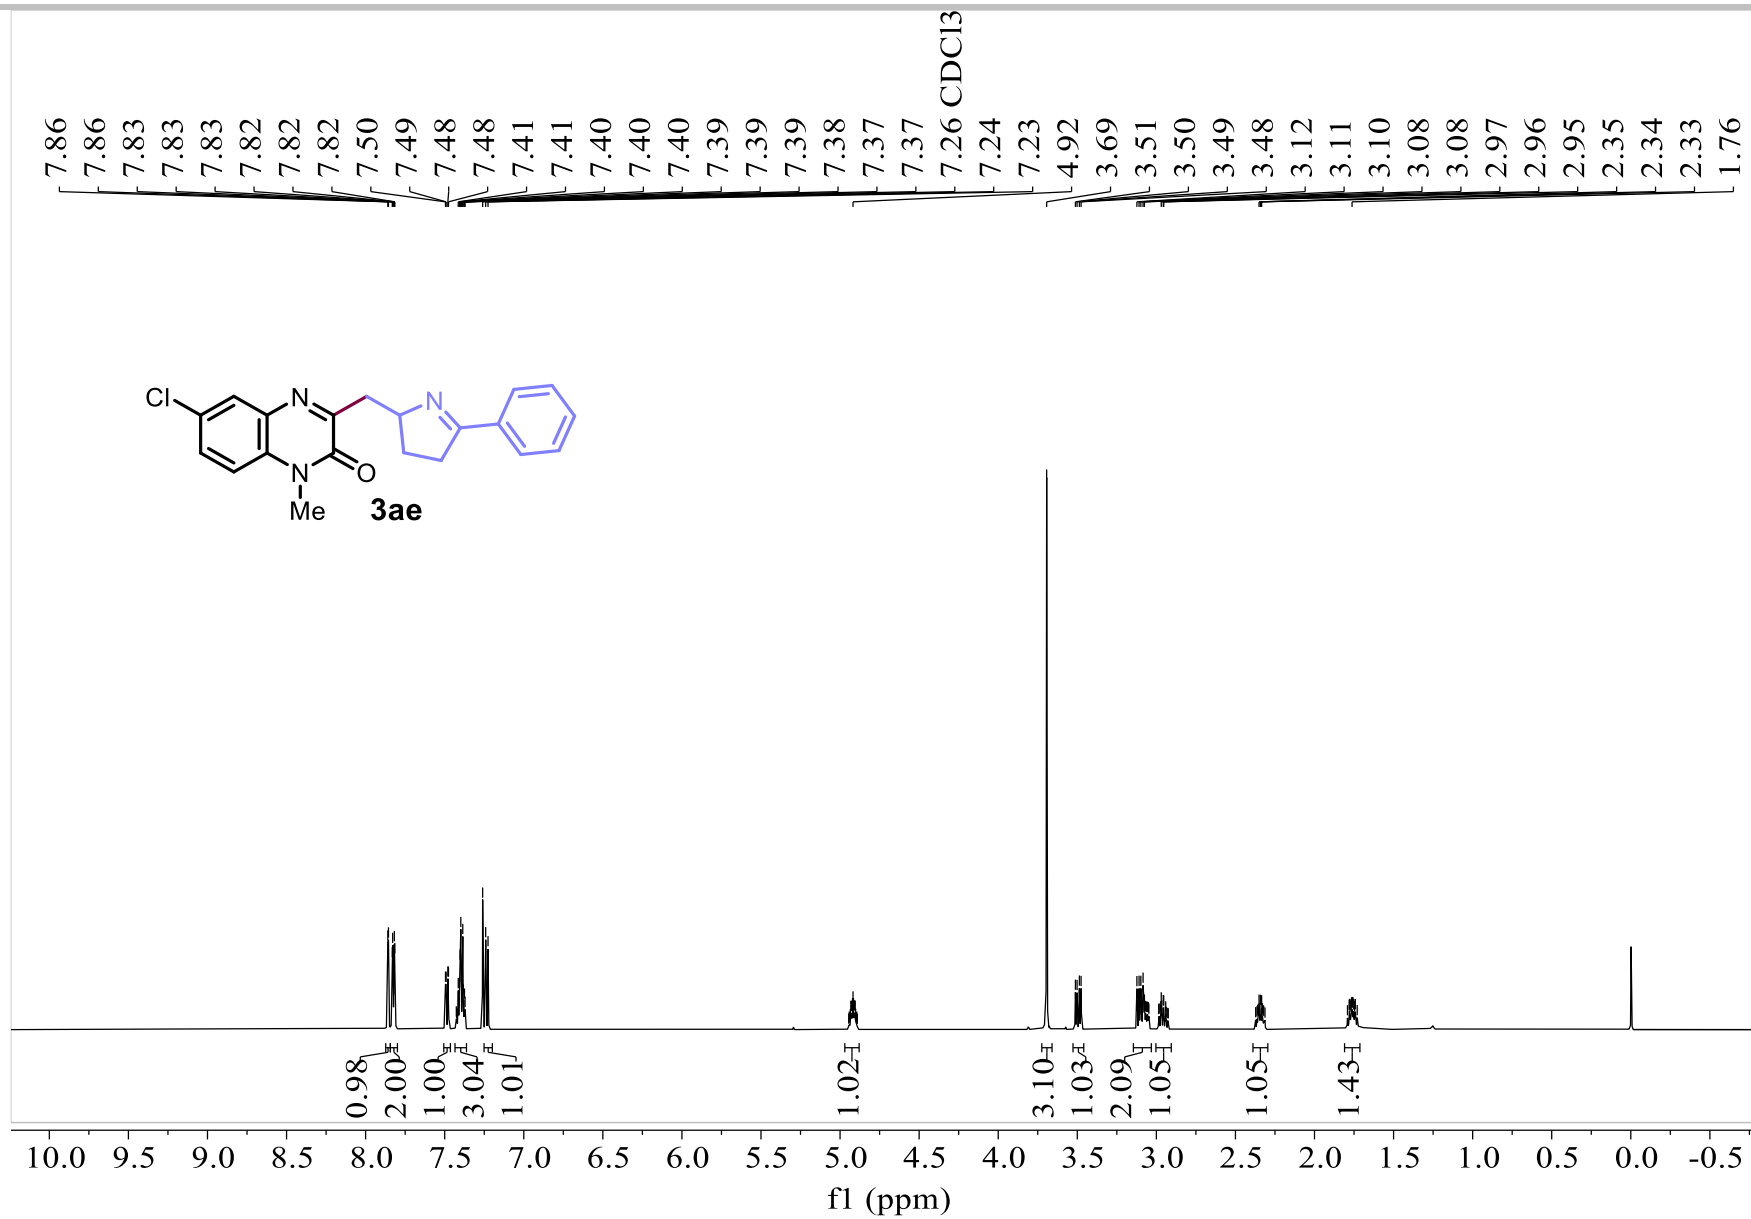

SUPPLEMENTARY INFORMATION

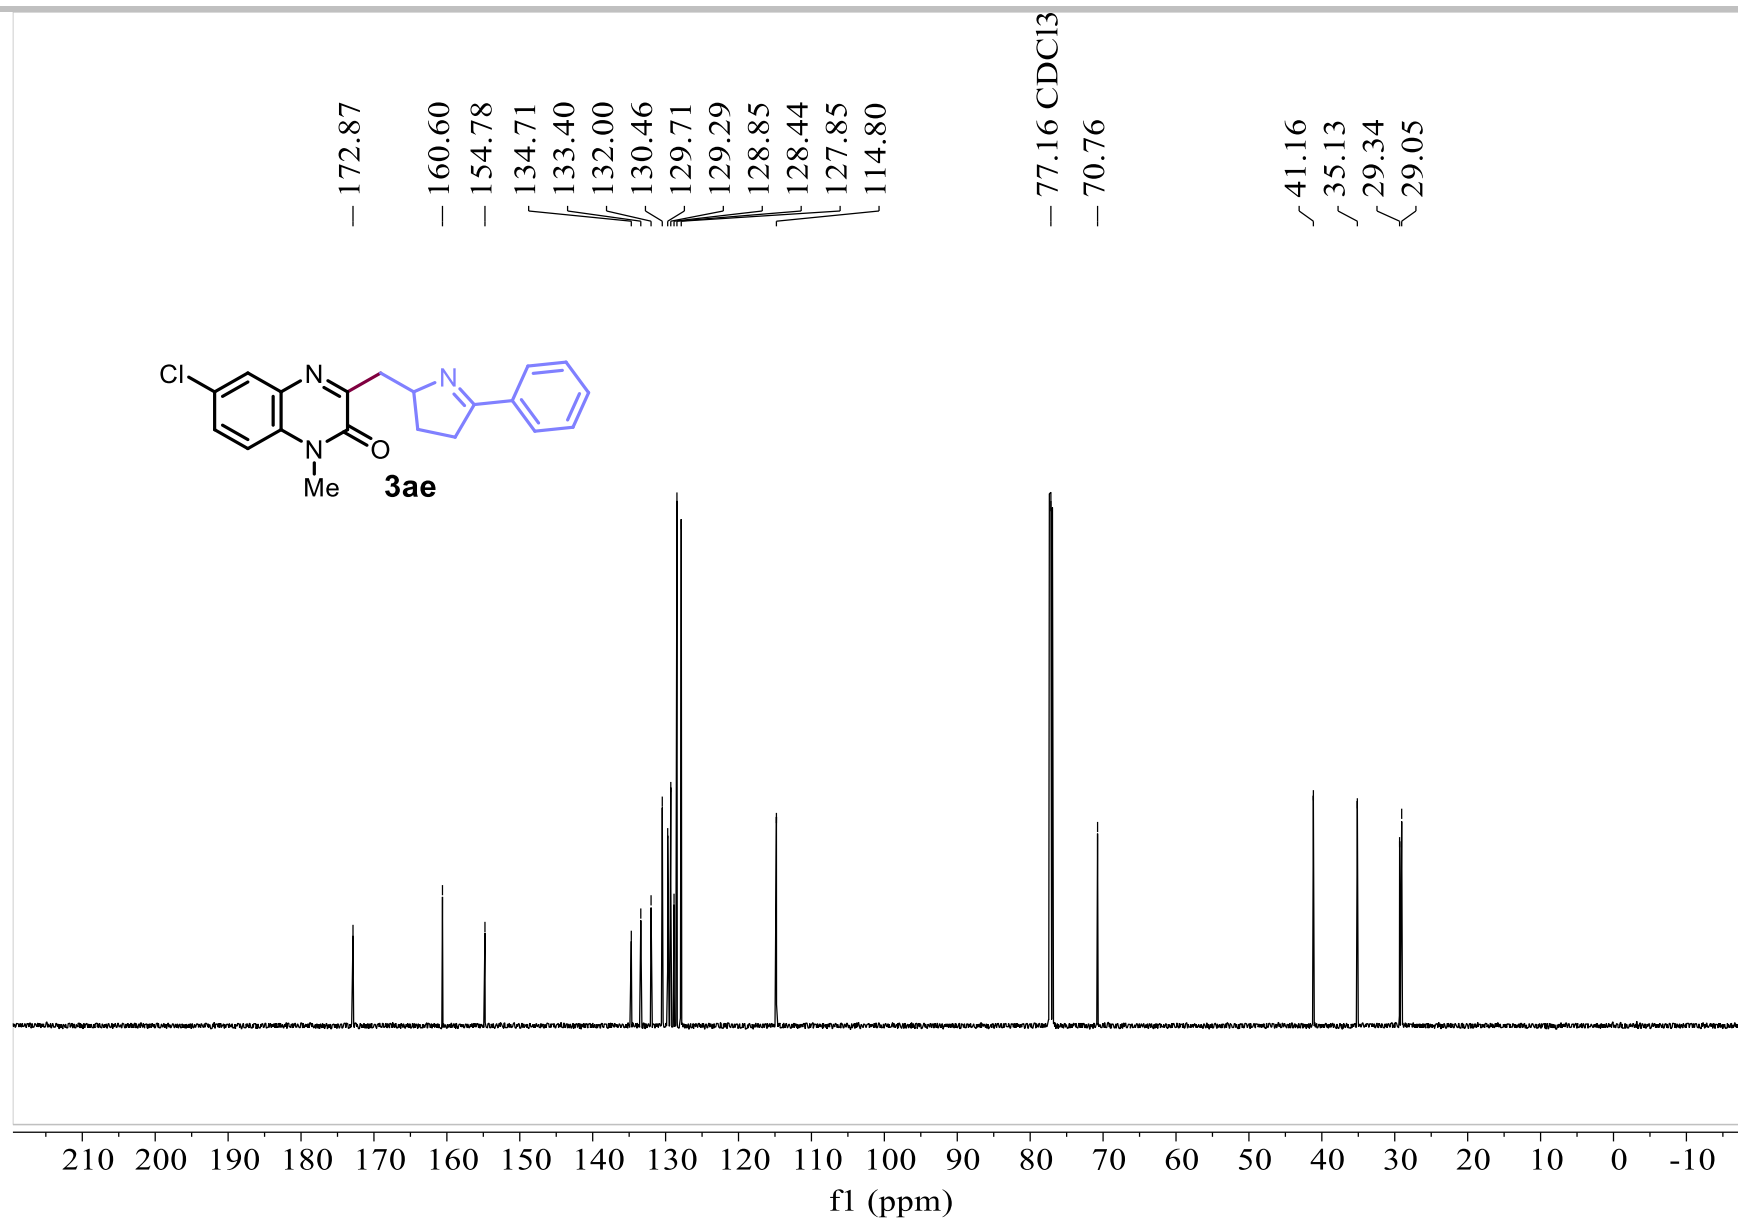

SUPPLEMENTARY INFORMATION

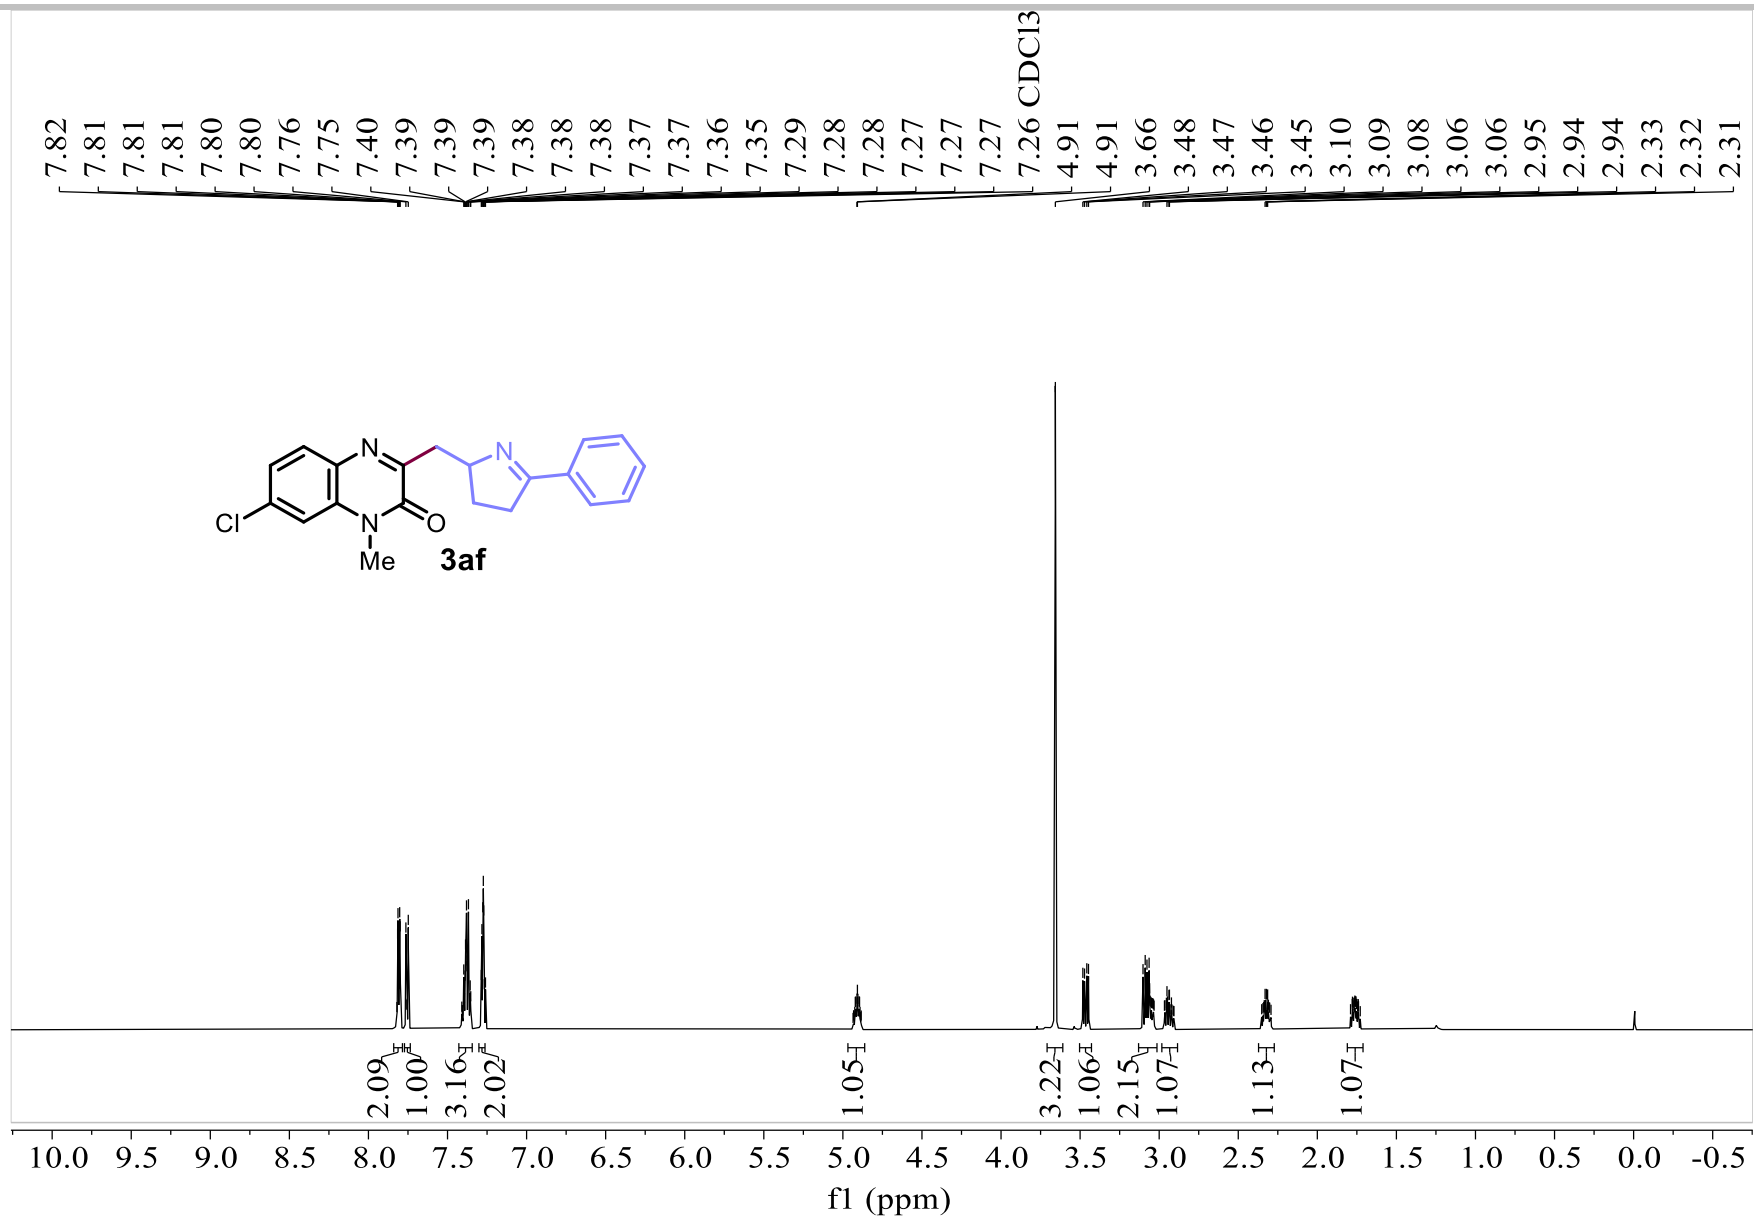



SUPPLEMENTARY INFORMATION

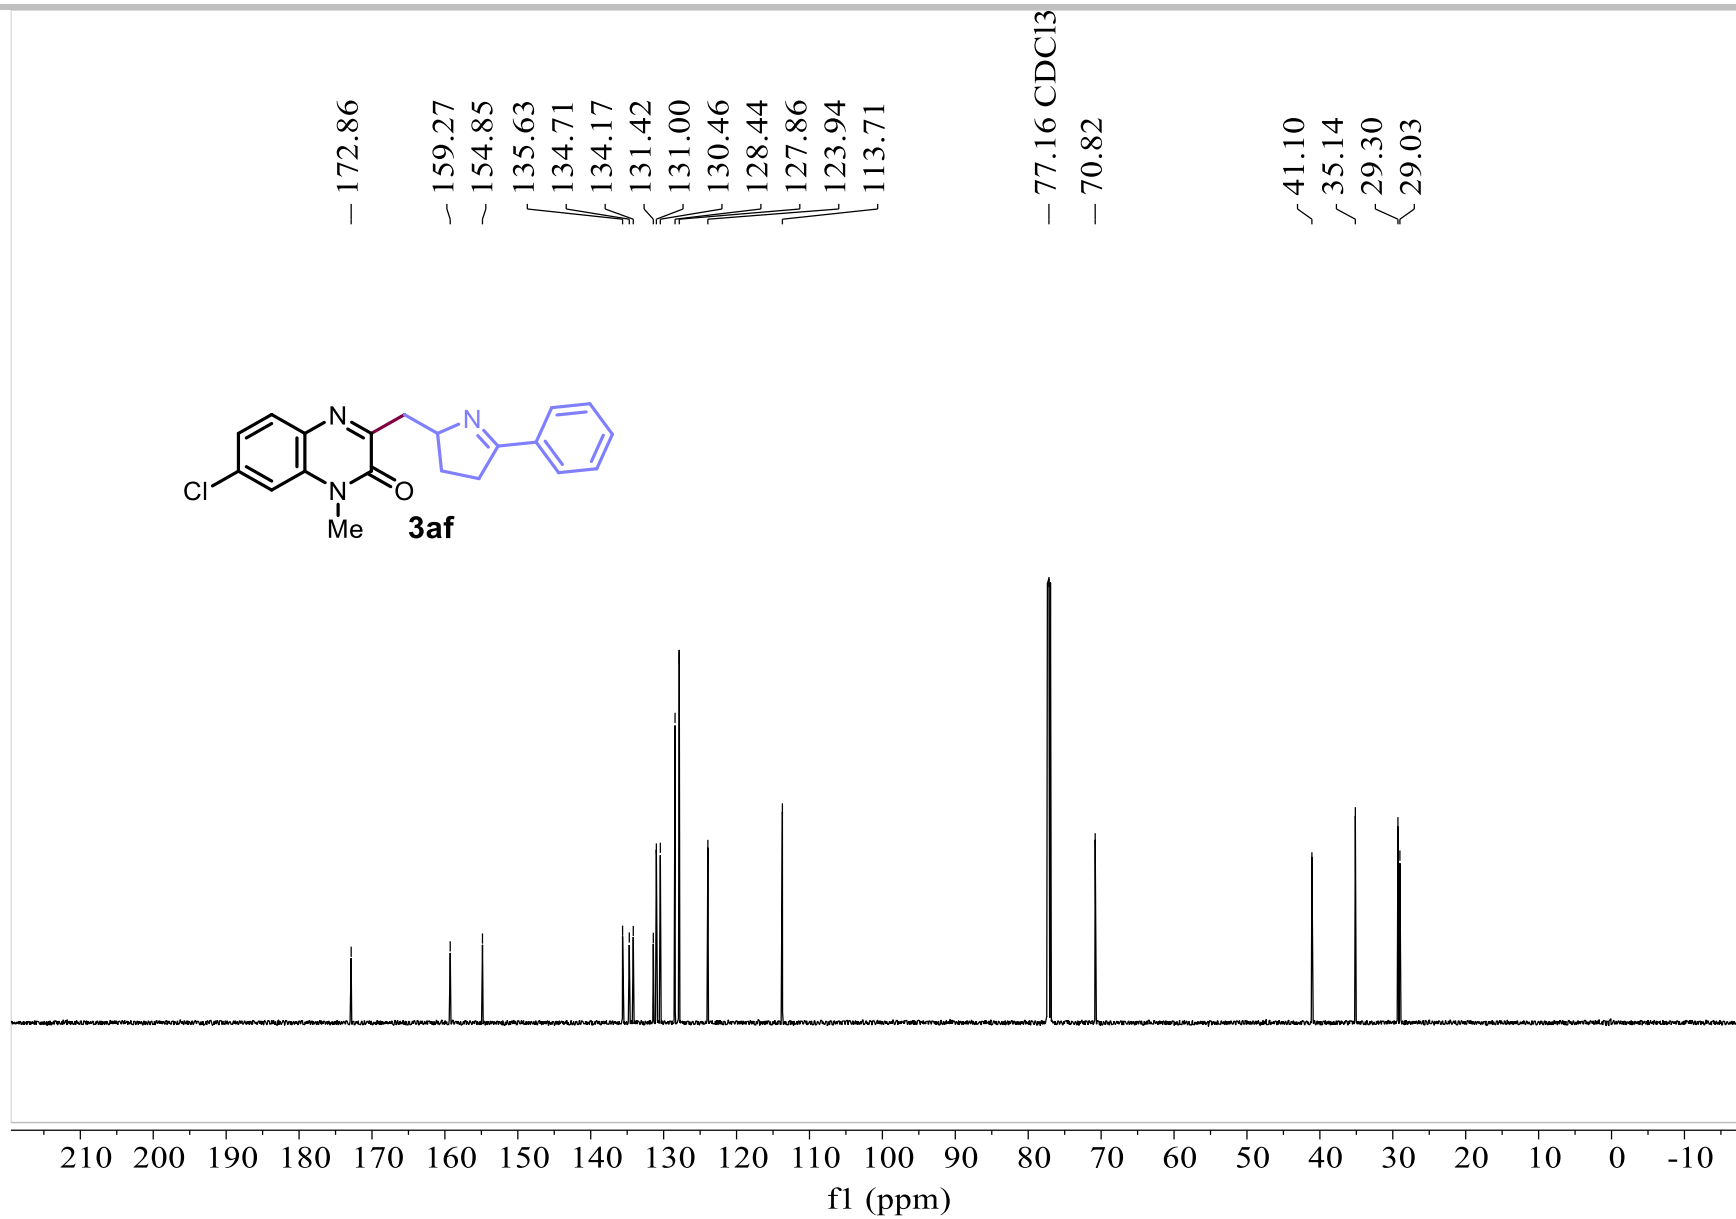

SUPPLEMENTARY INFORMATION

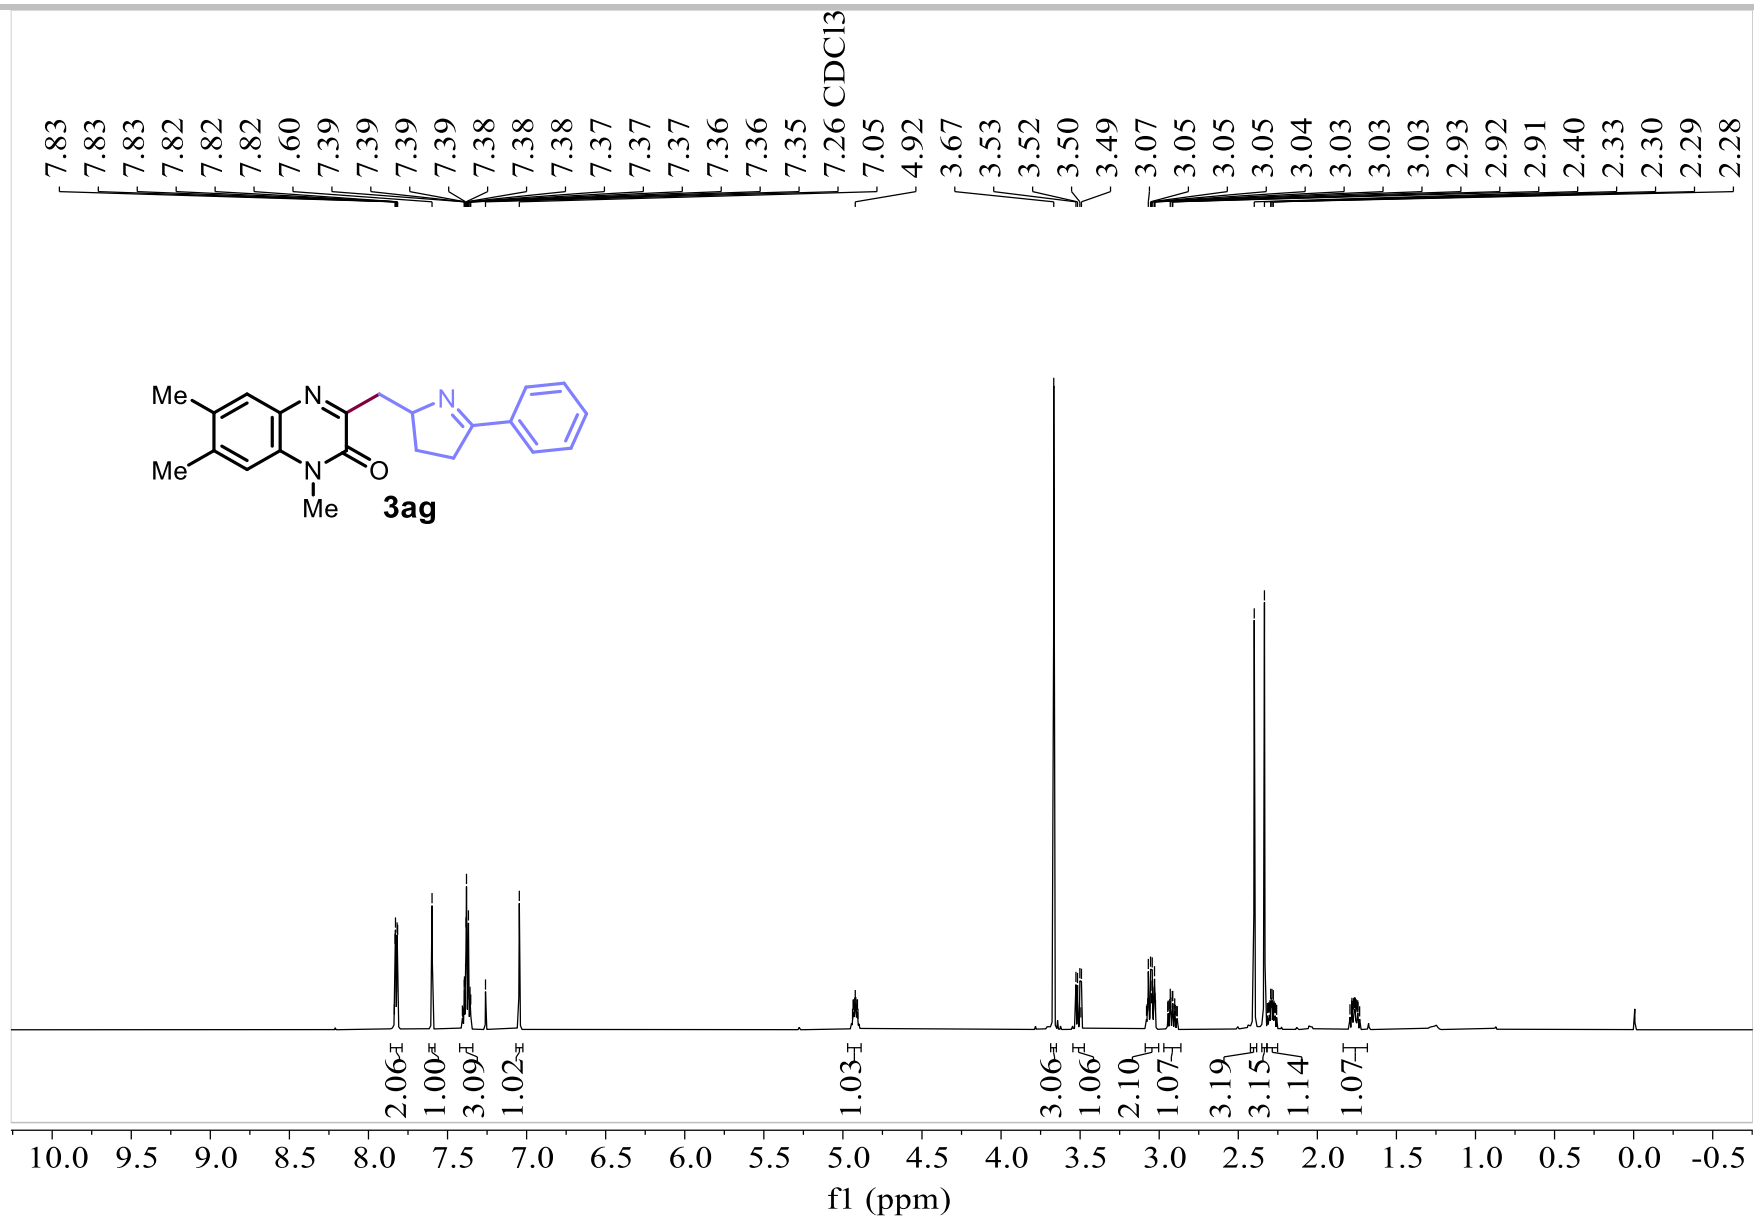

SUPPLEMENTARY INFORMATION

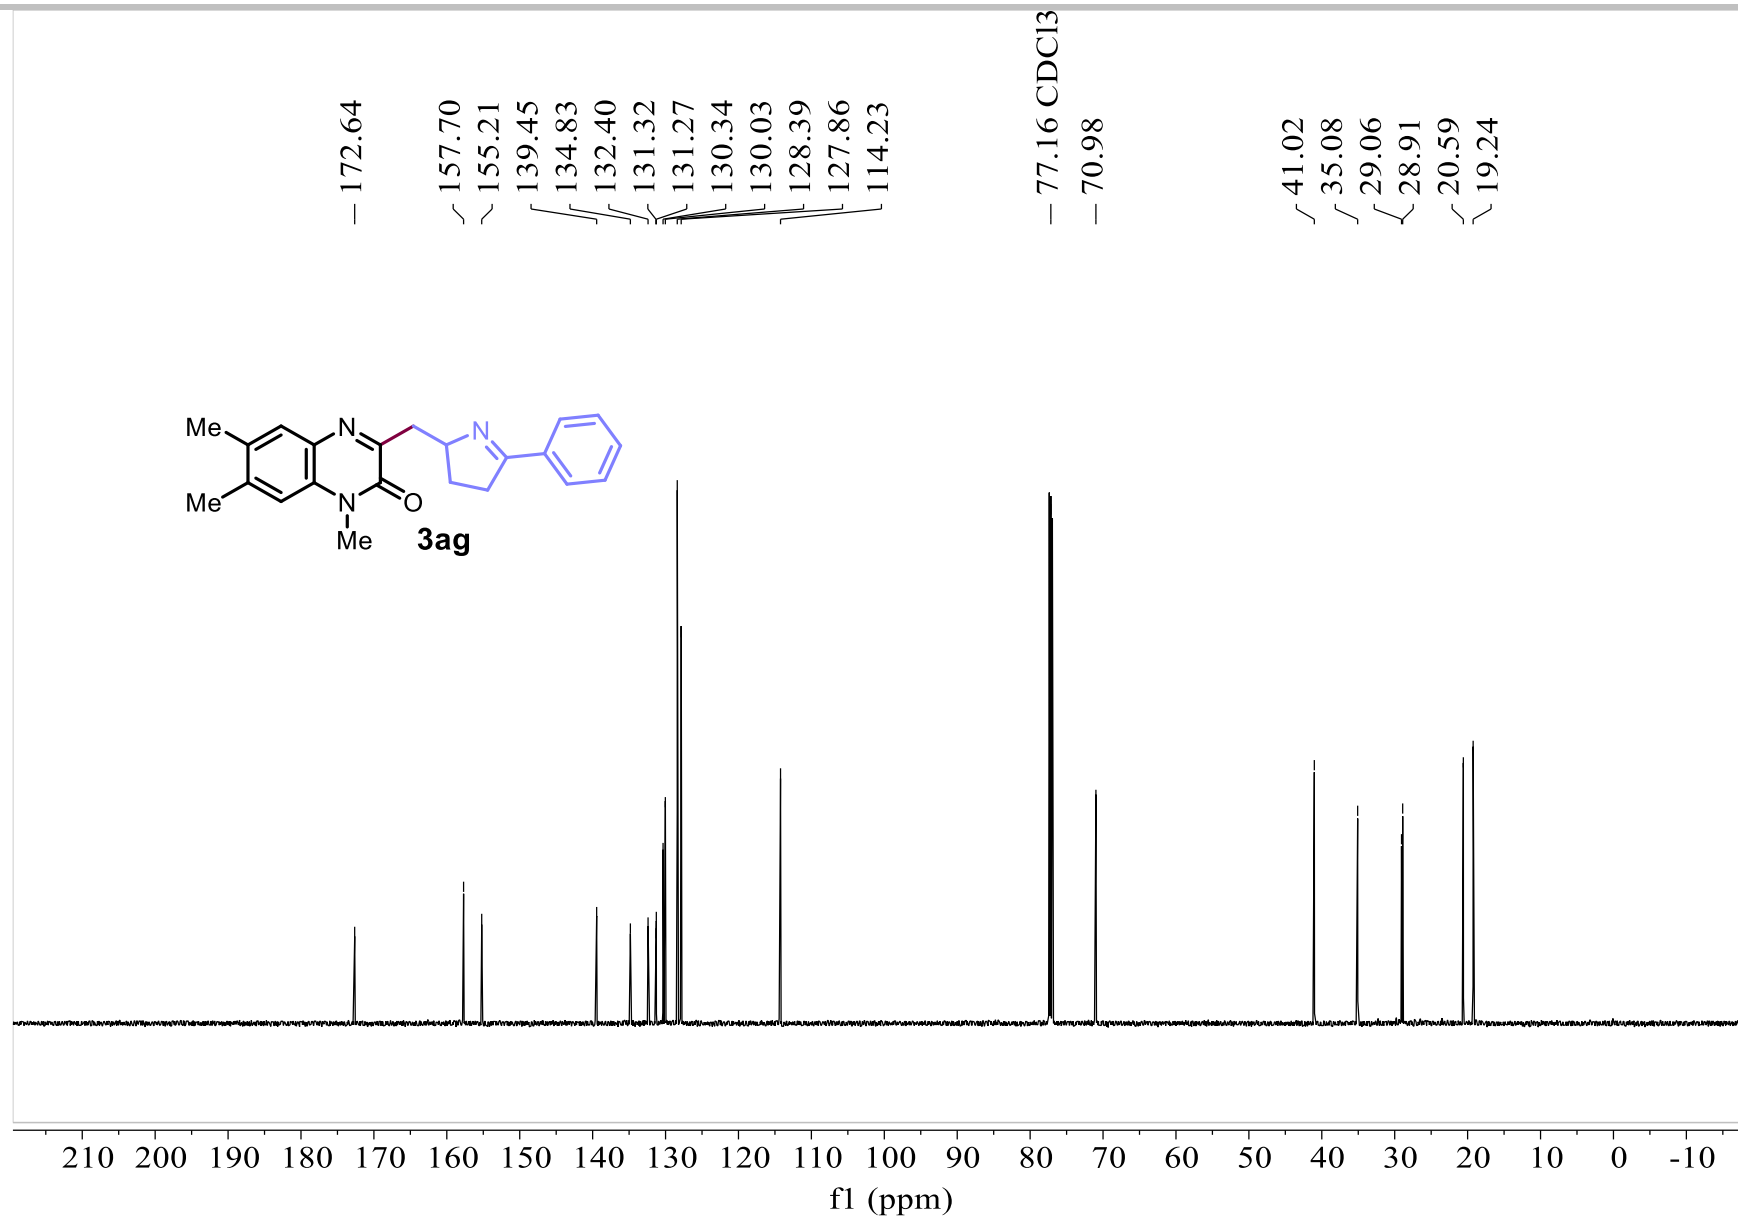

SUPPLEMENTARY INFORMATION

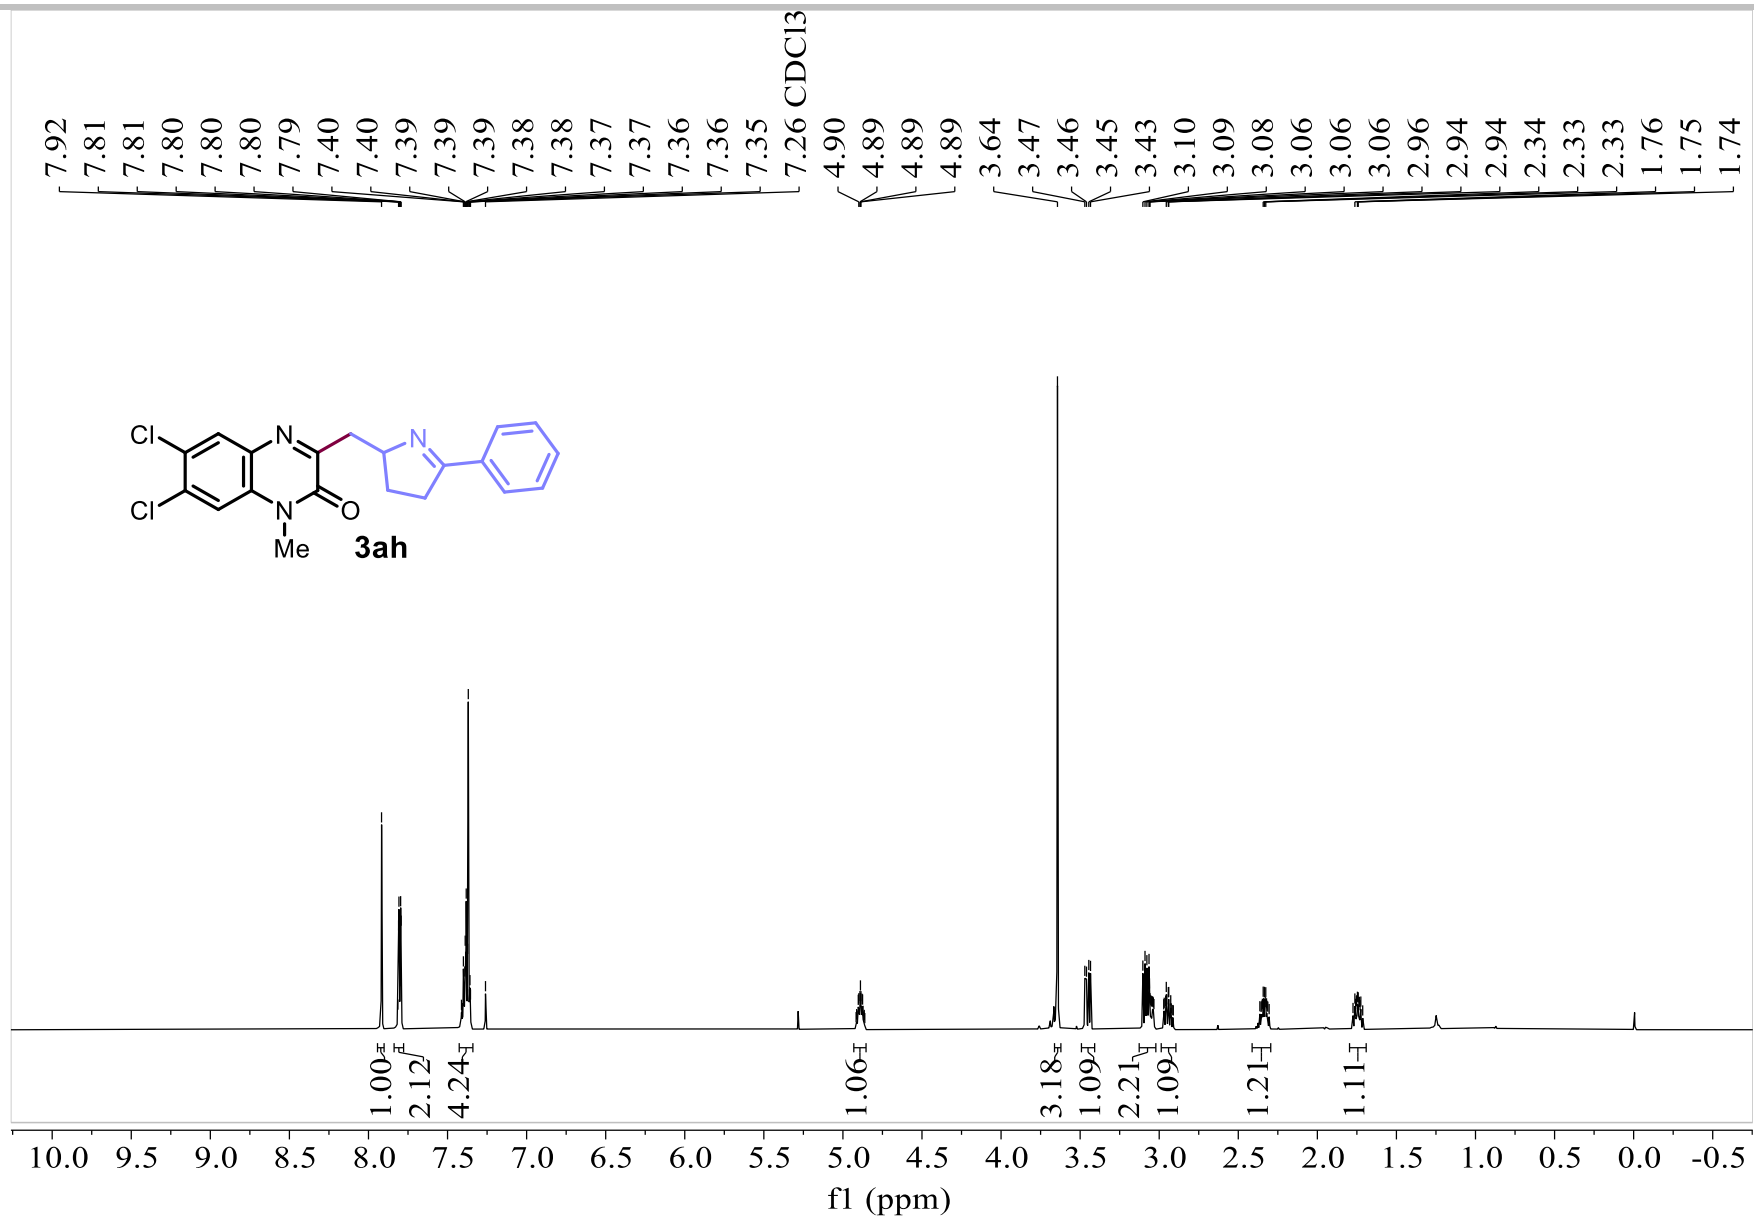

SUPPLEMENTARY INFORMATION

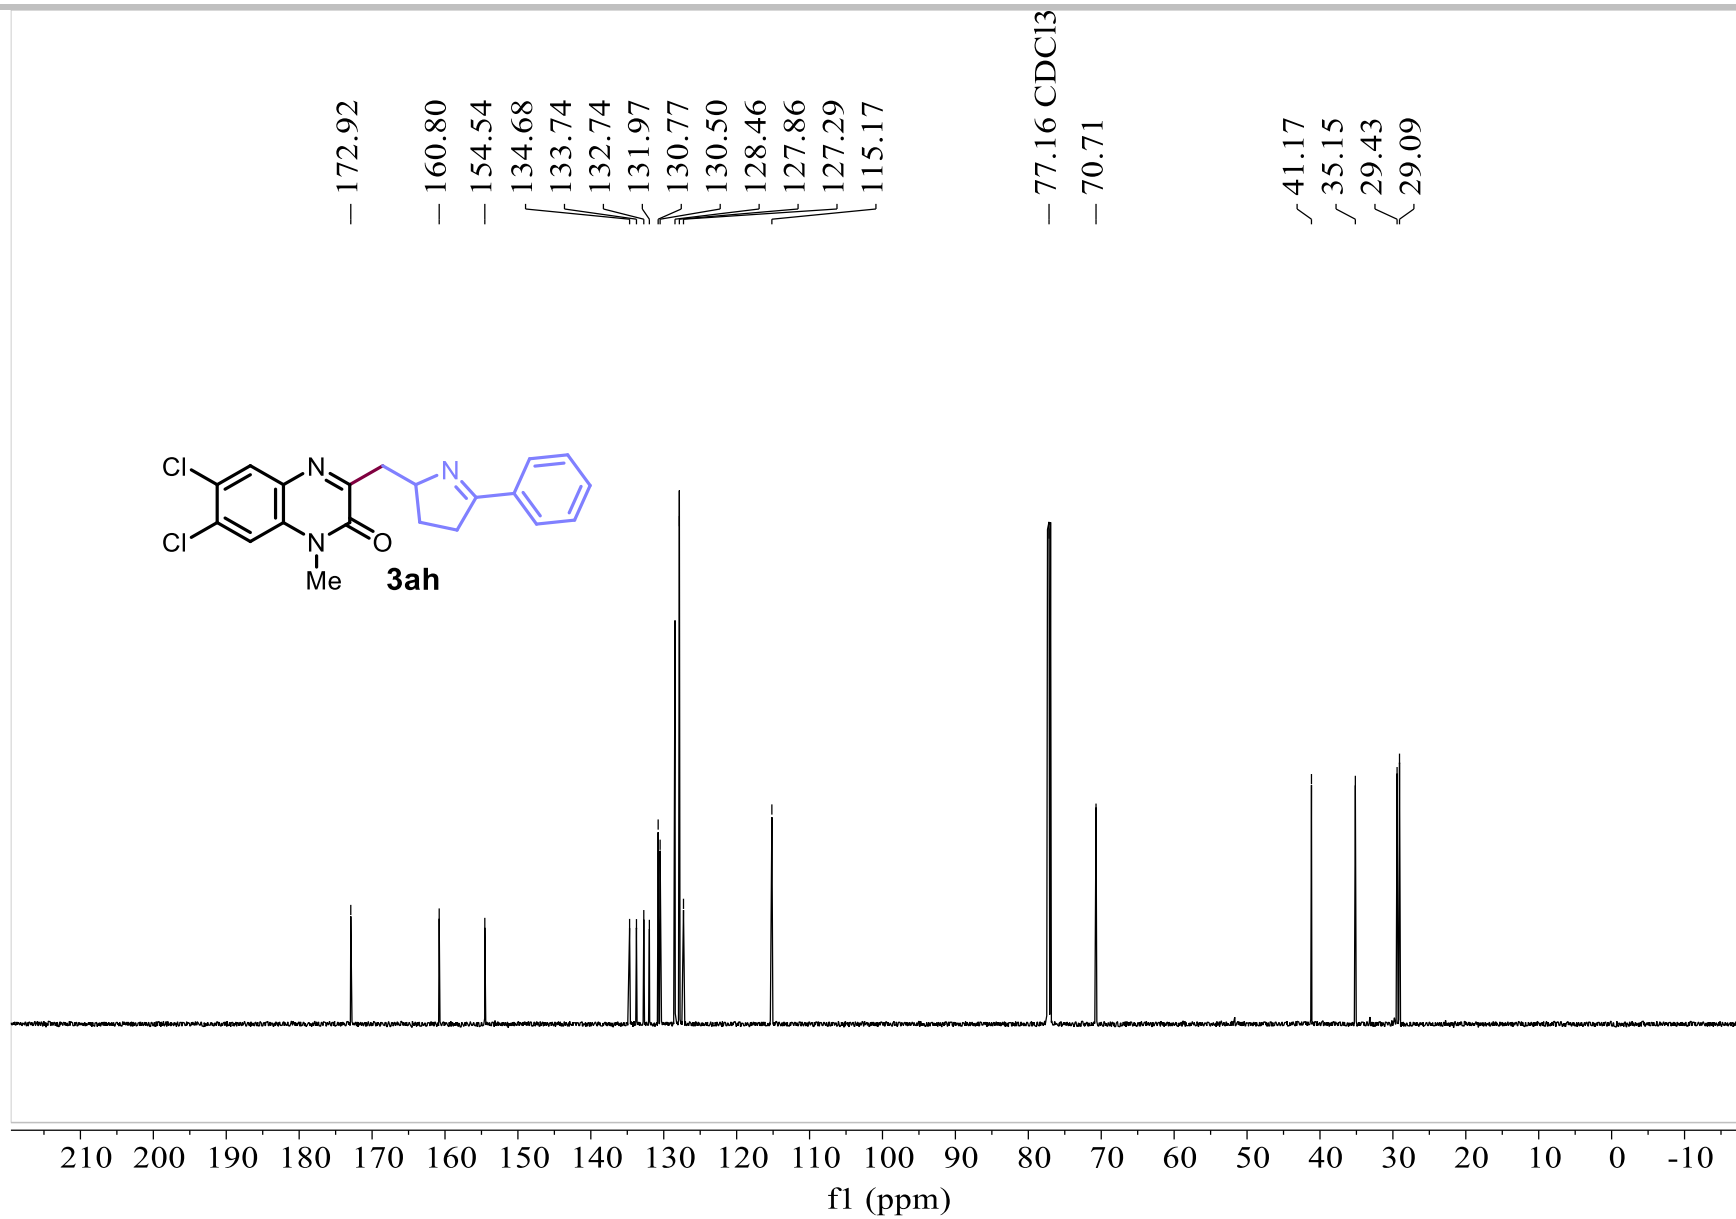



SUPPLEMENTARY INFORMATION

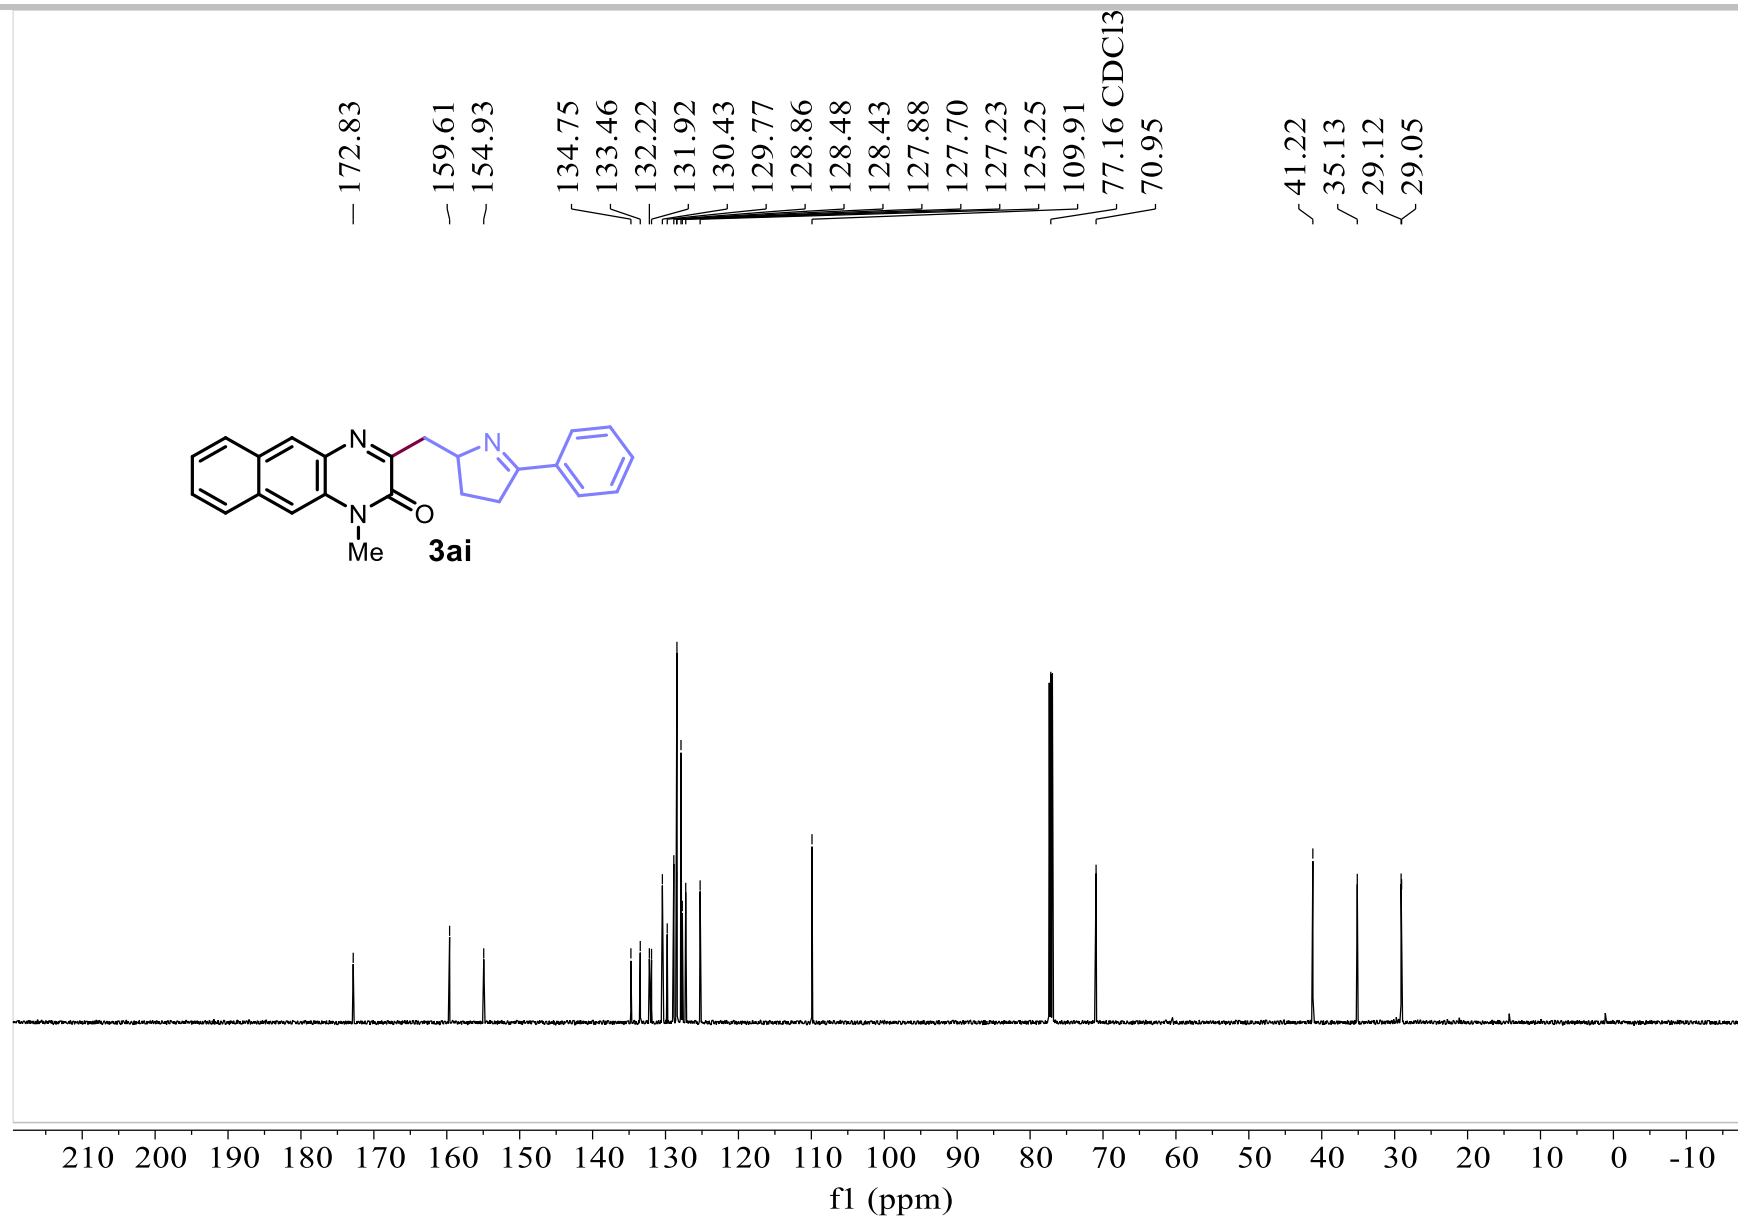

SUPPLEMENTARY INFORMATION

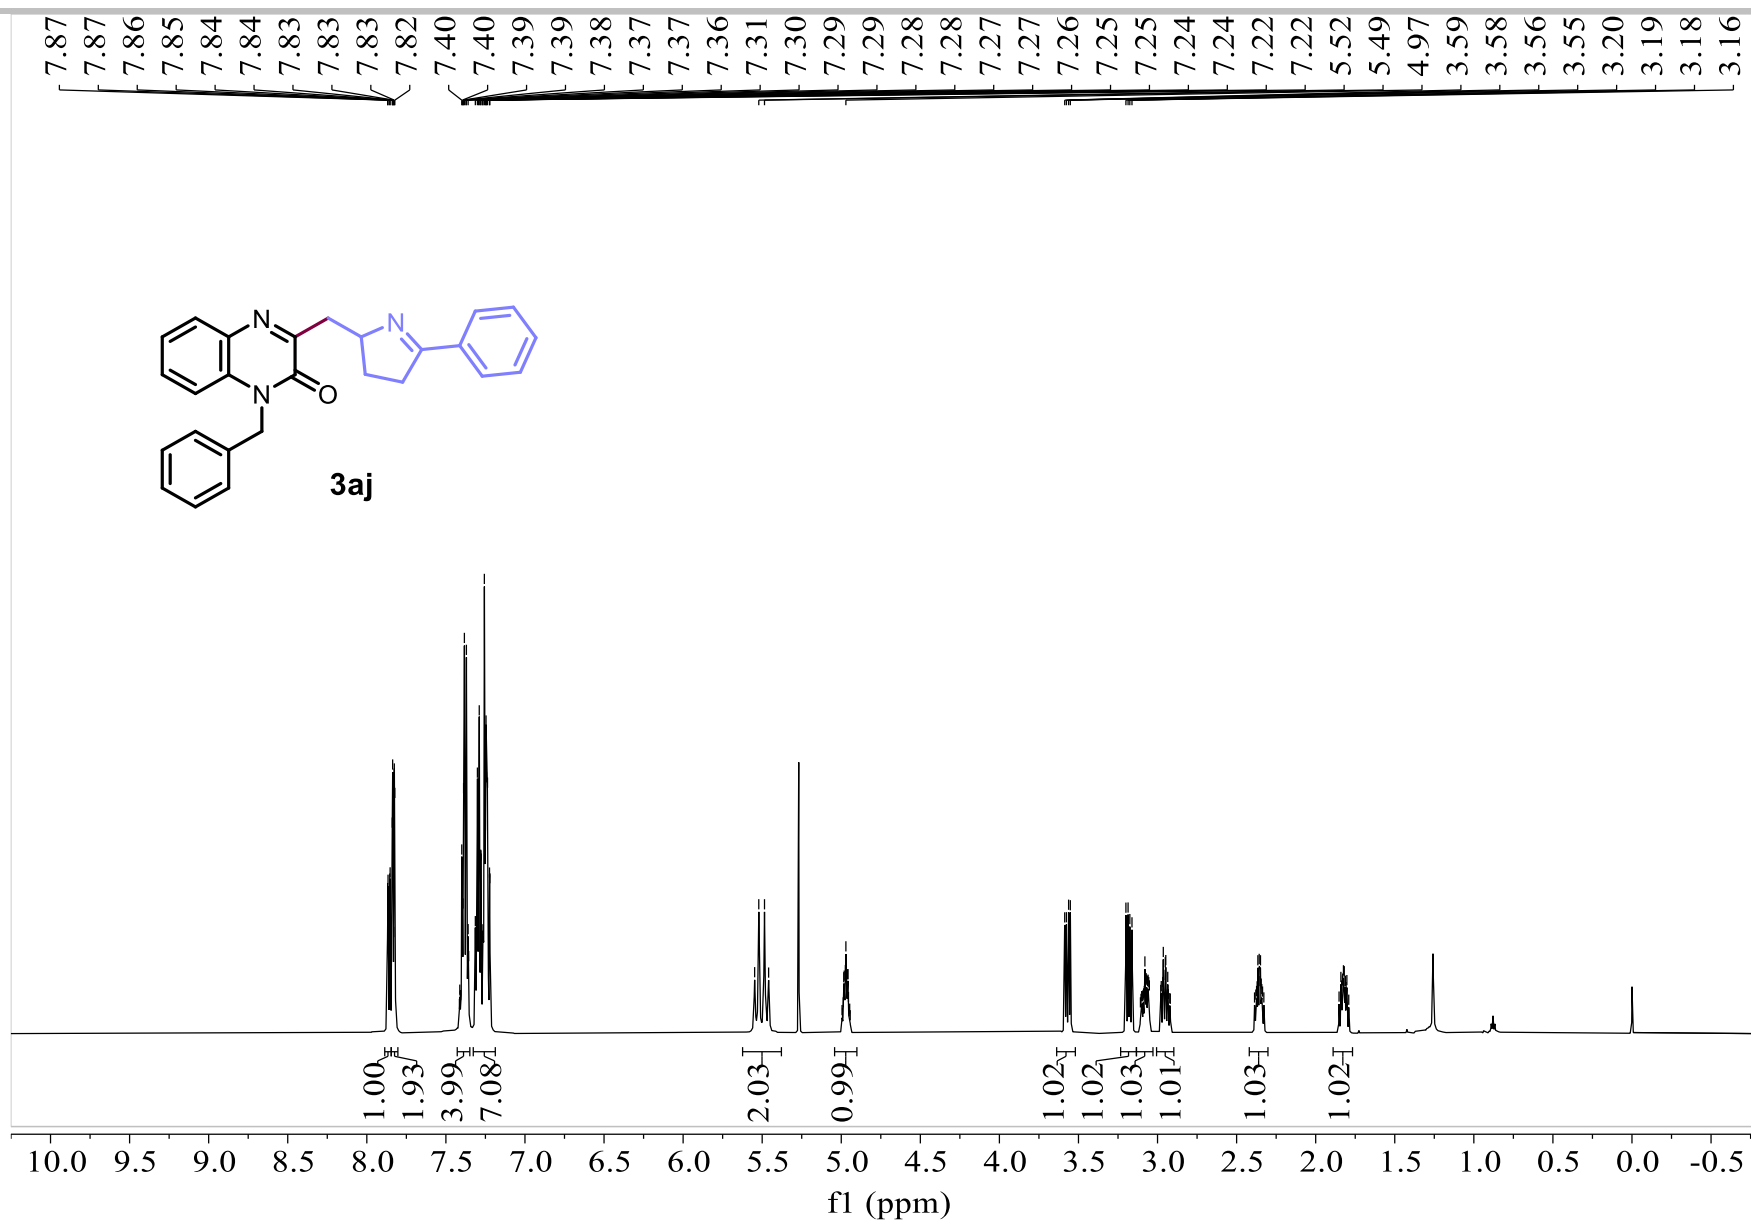



SUPPLEMENTARY INFORMATION

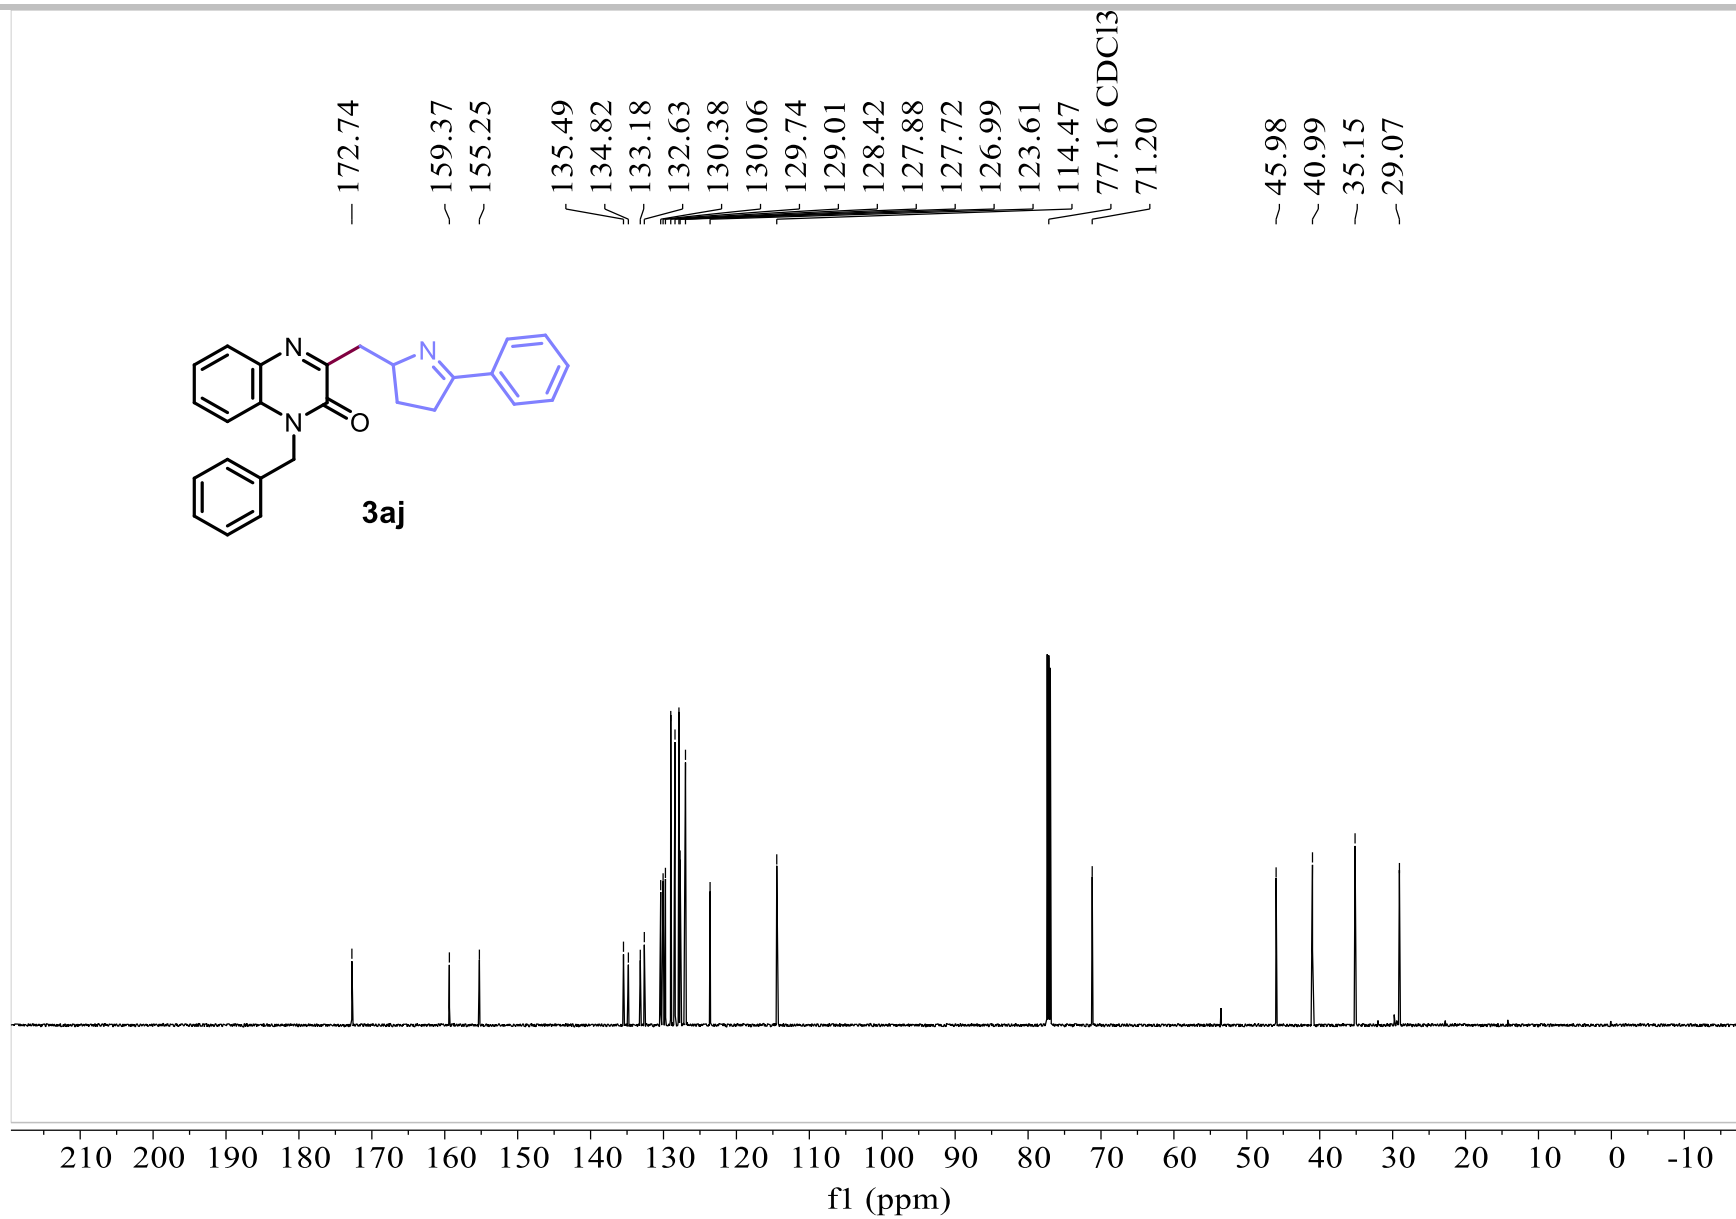

SUPPLEMENTARY INFORMATION

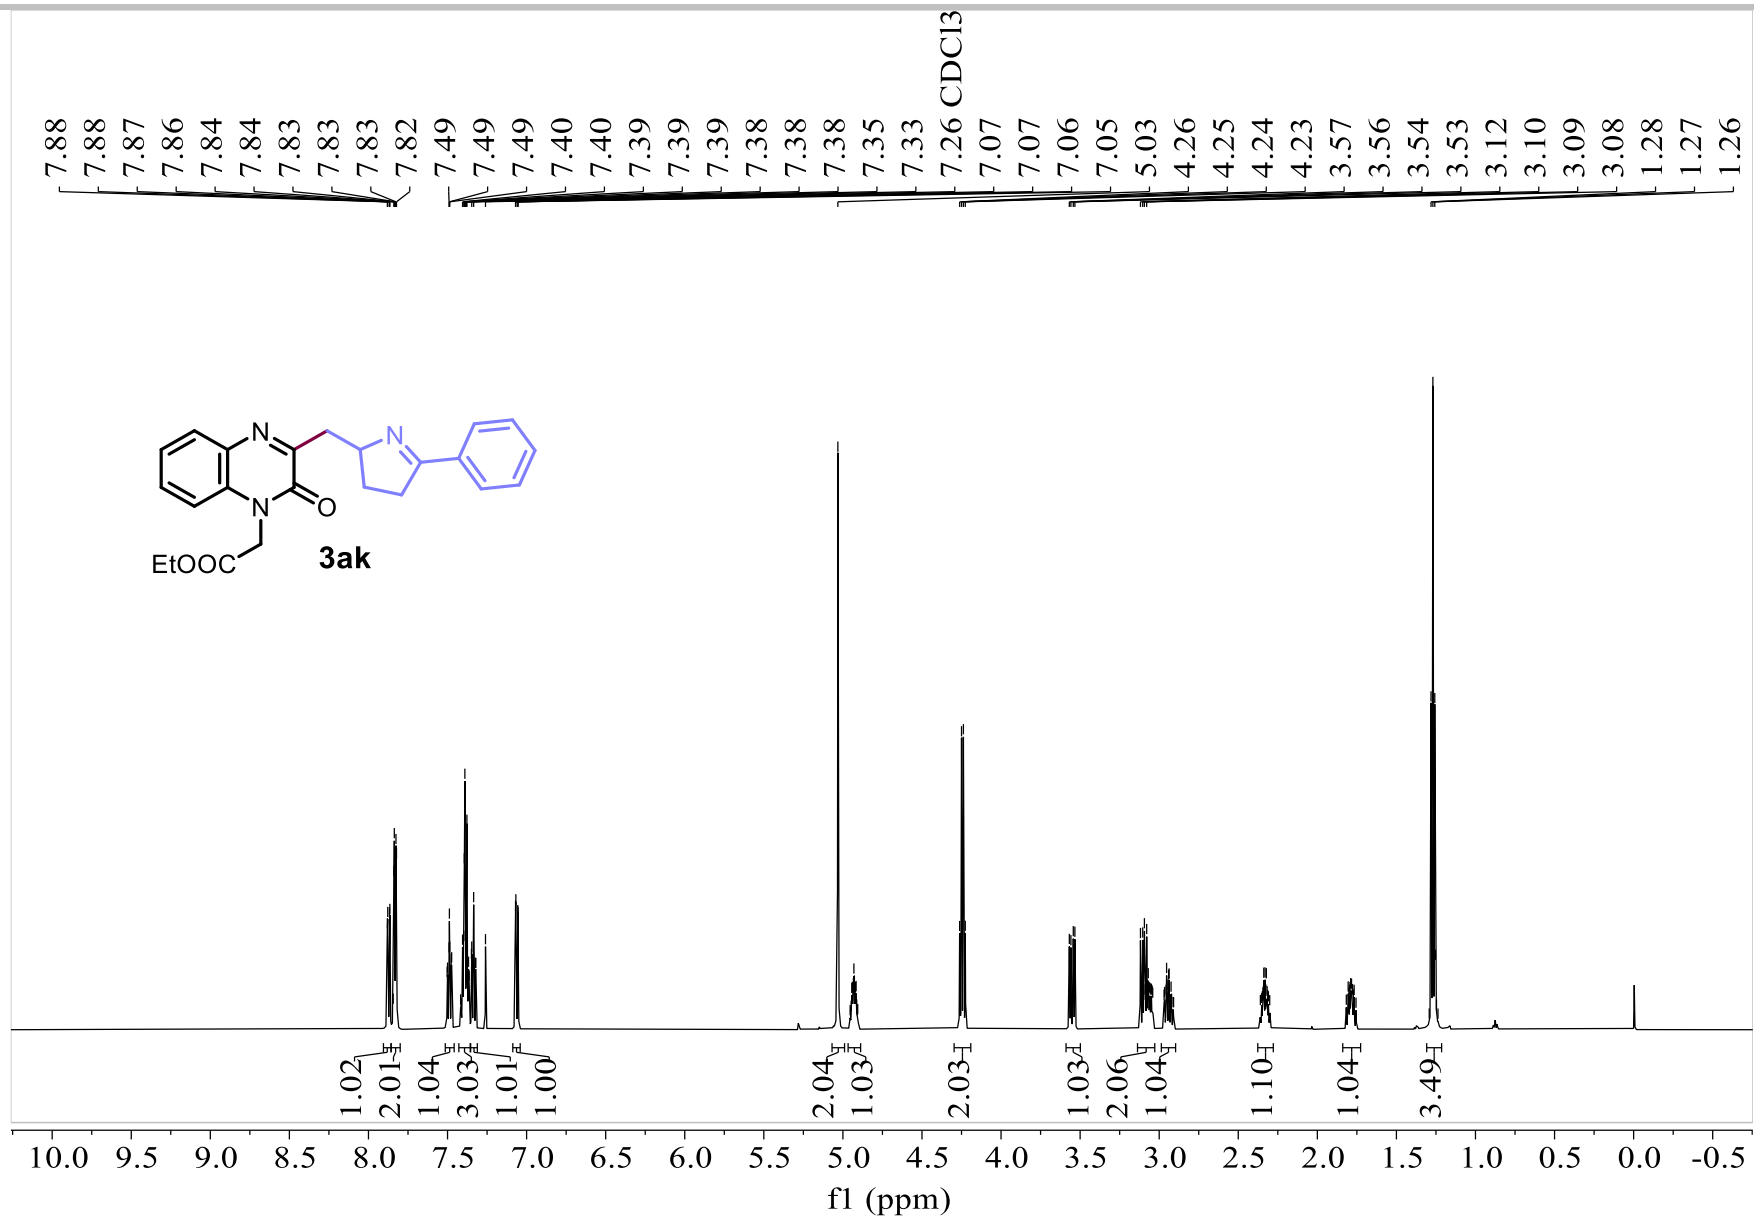

SUPPLEMENTARY INFORMATION

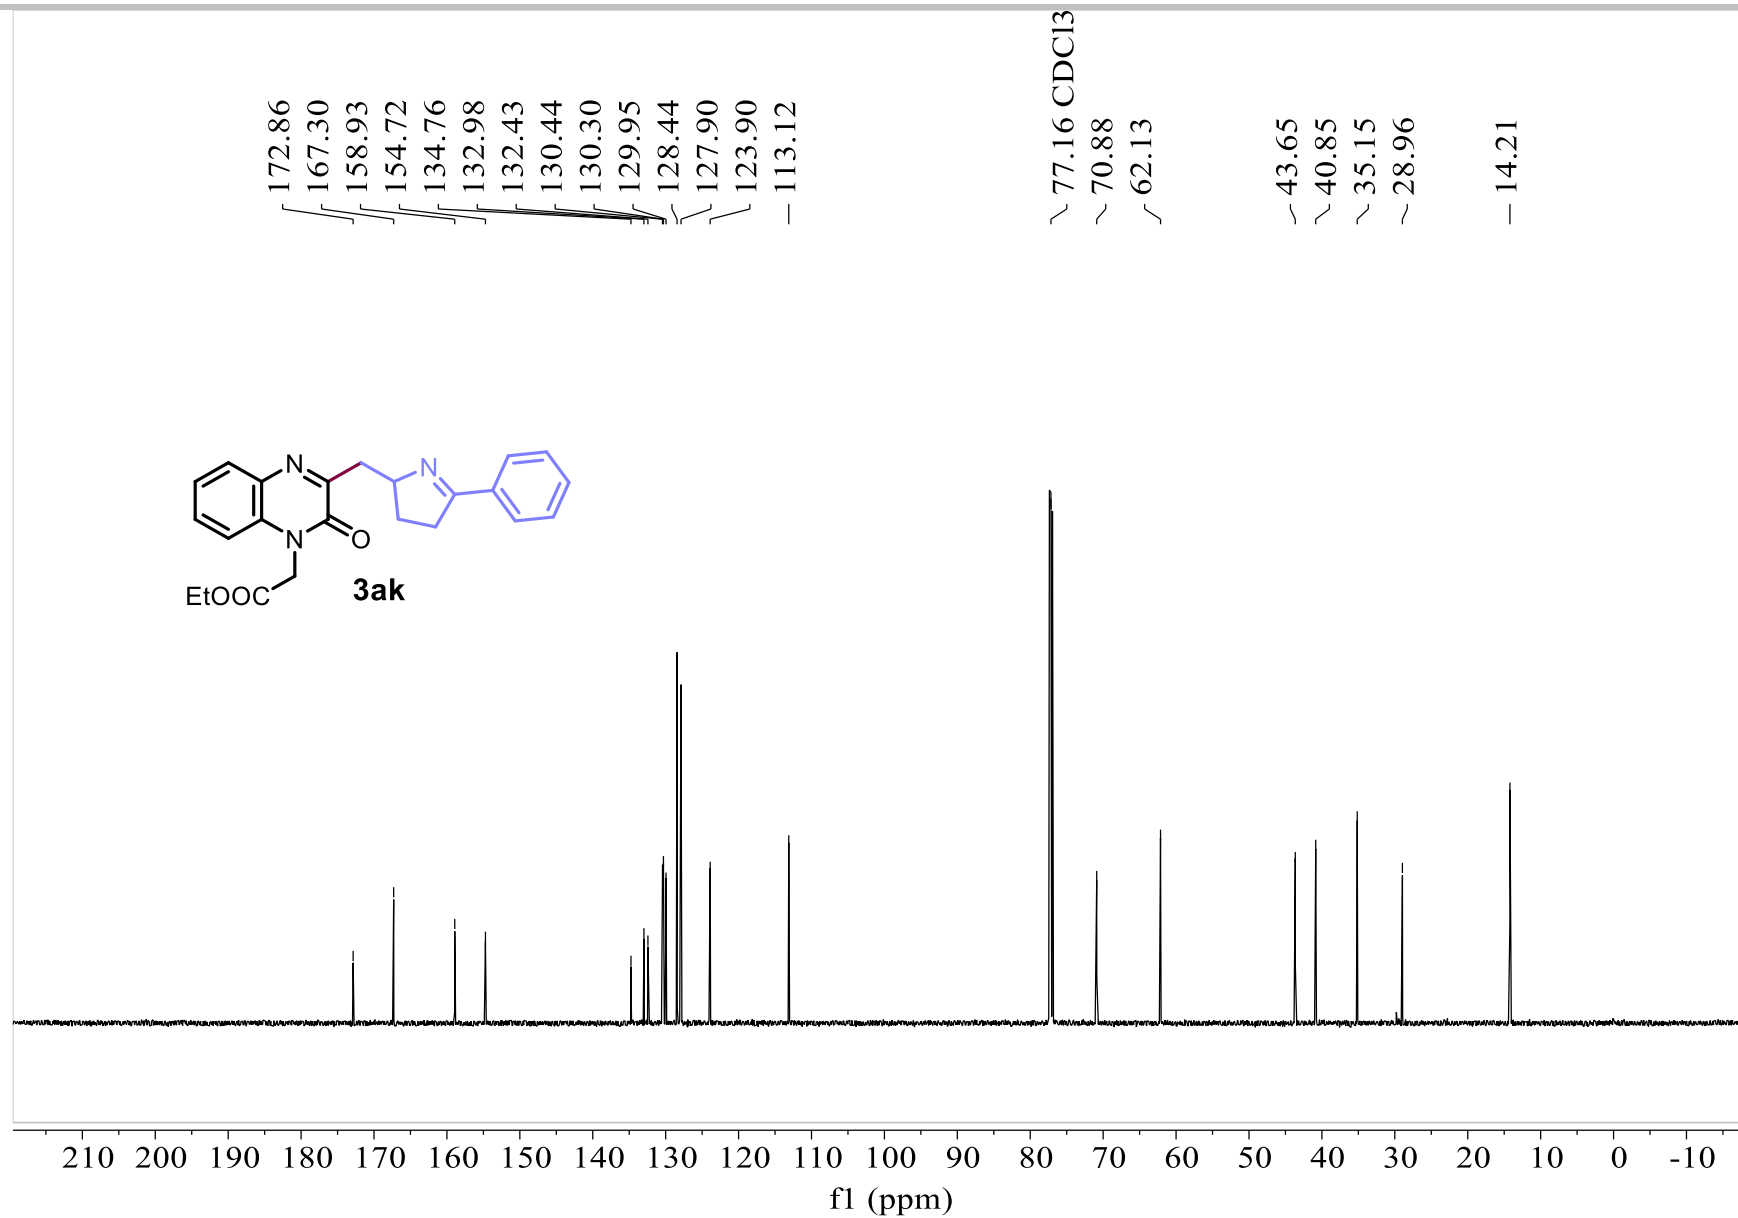

SUPPLEMENTARY INFORMATION

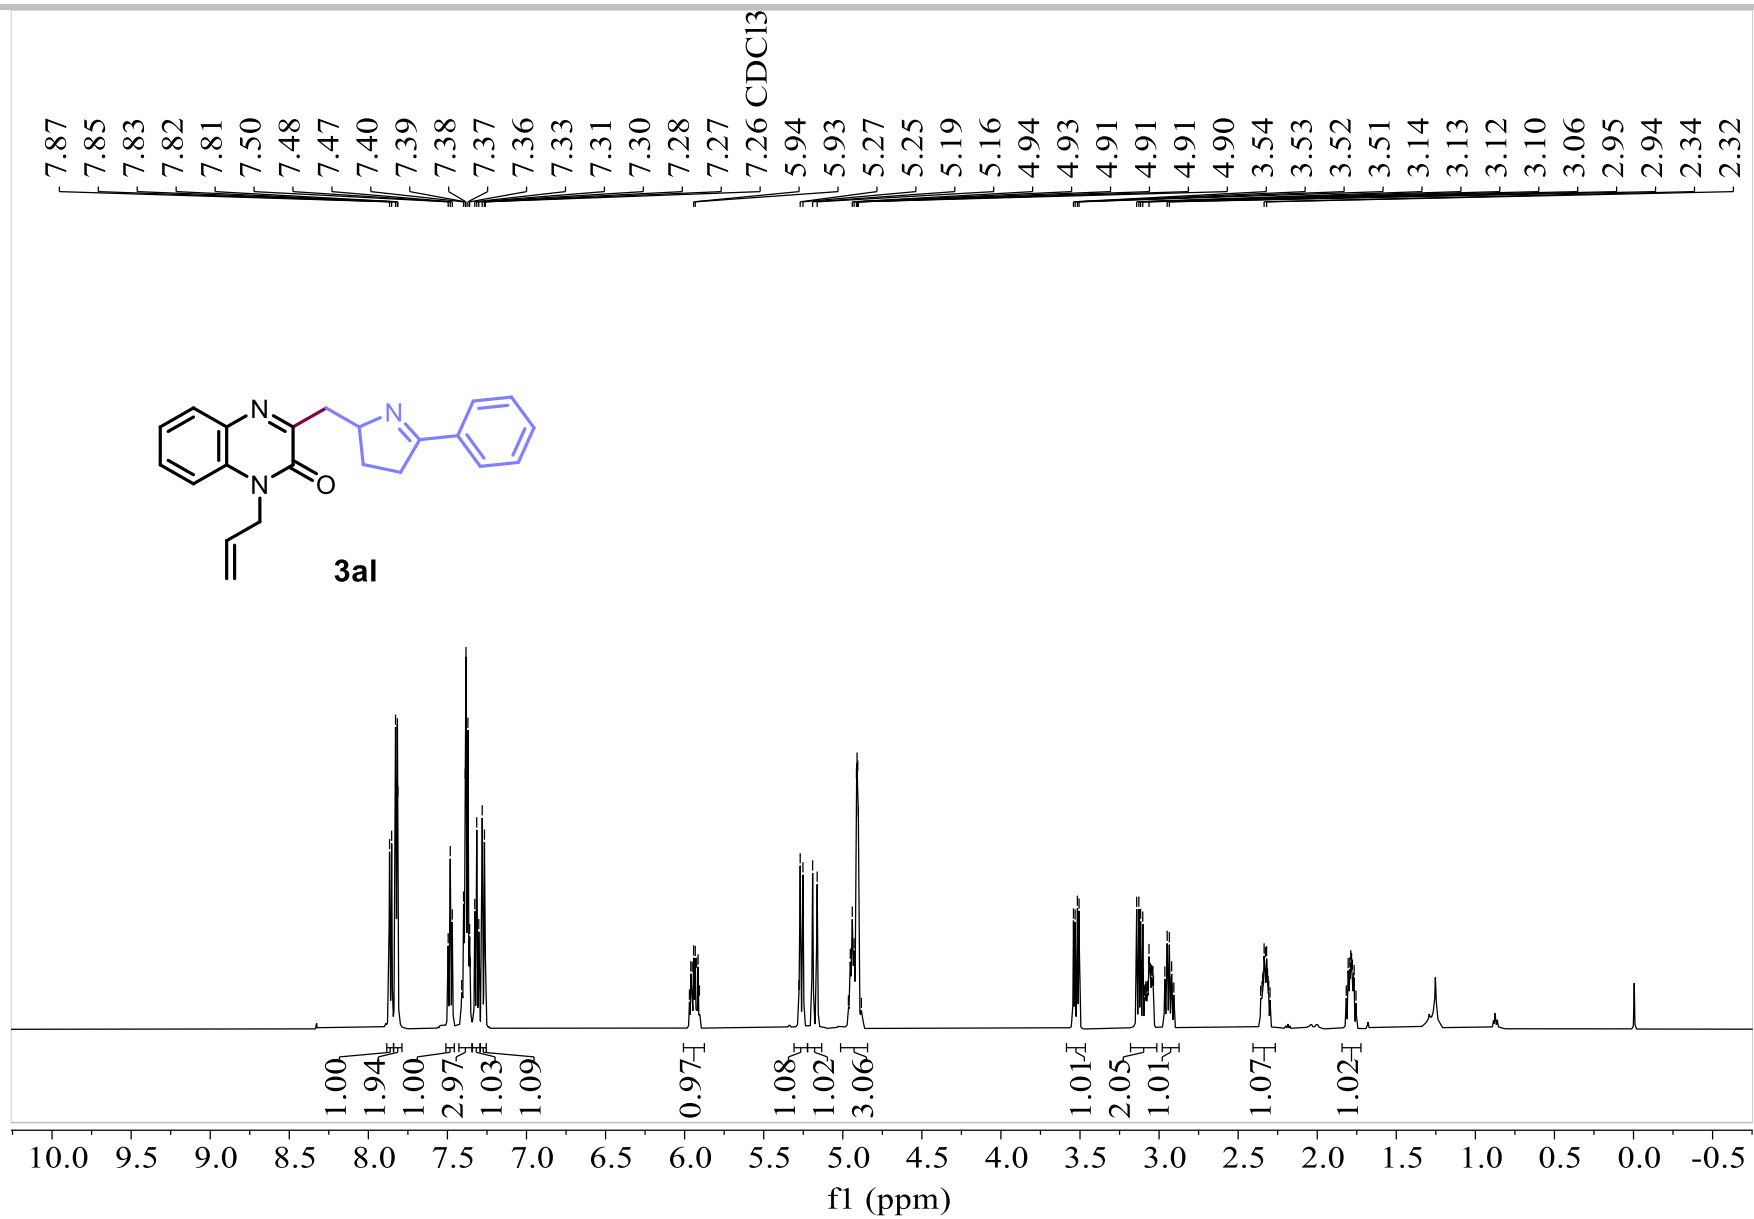

SUPPLEMENTARY INFORMATION

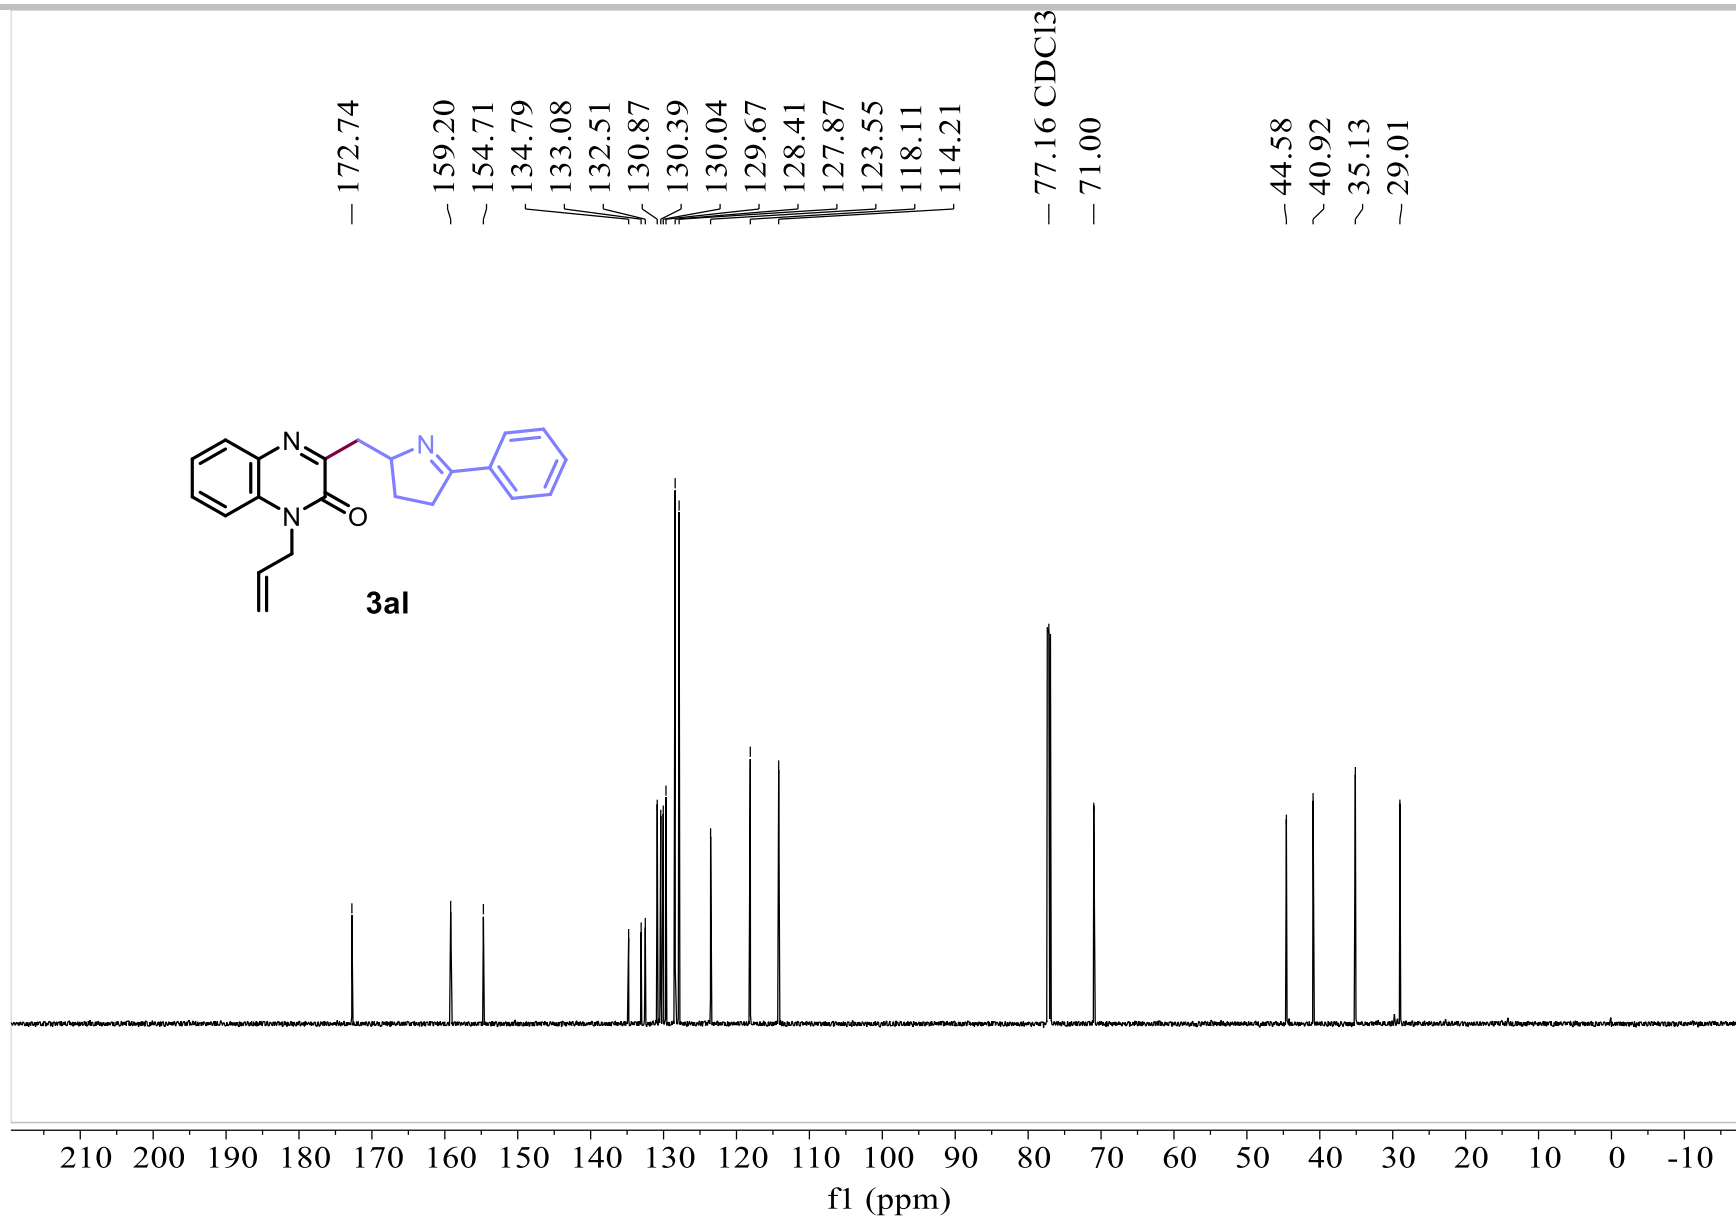

SUPPLEMENTARY INFORMATION

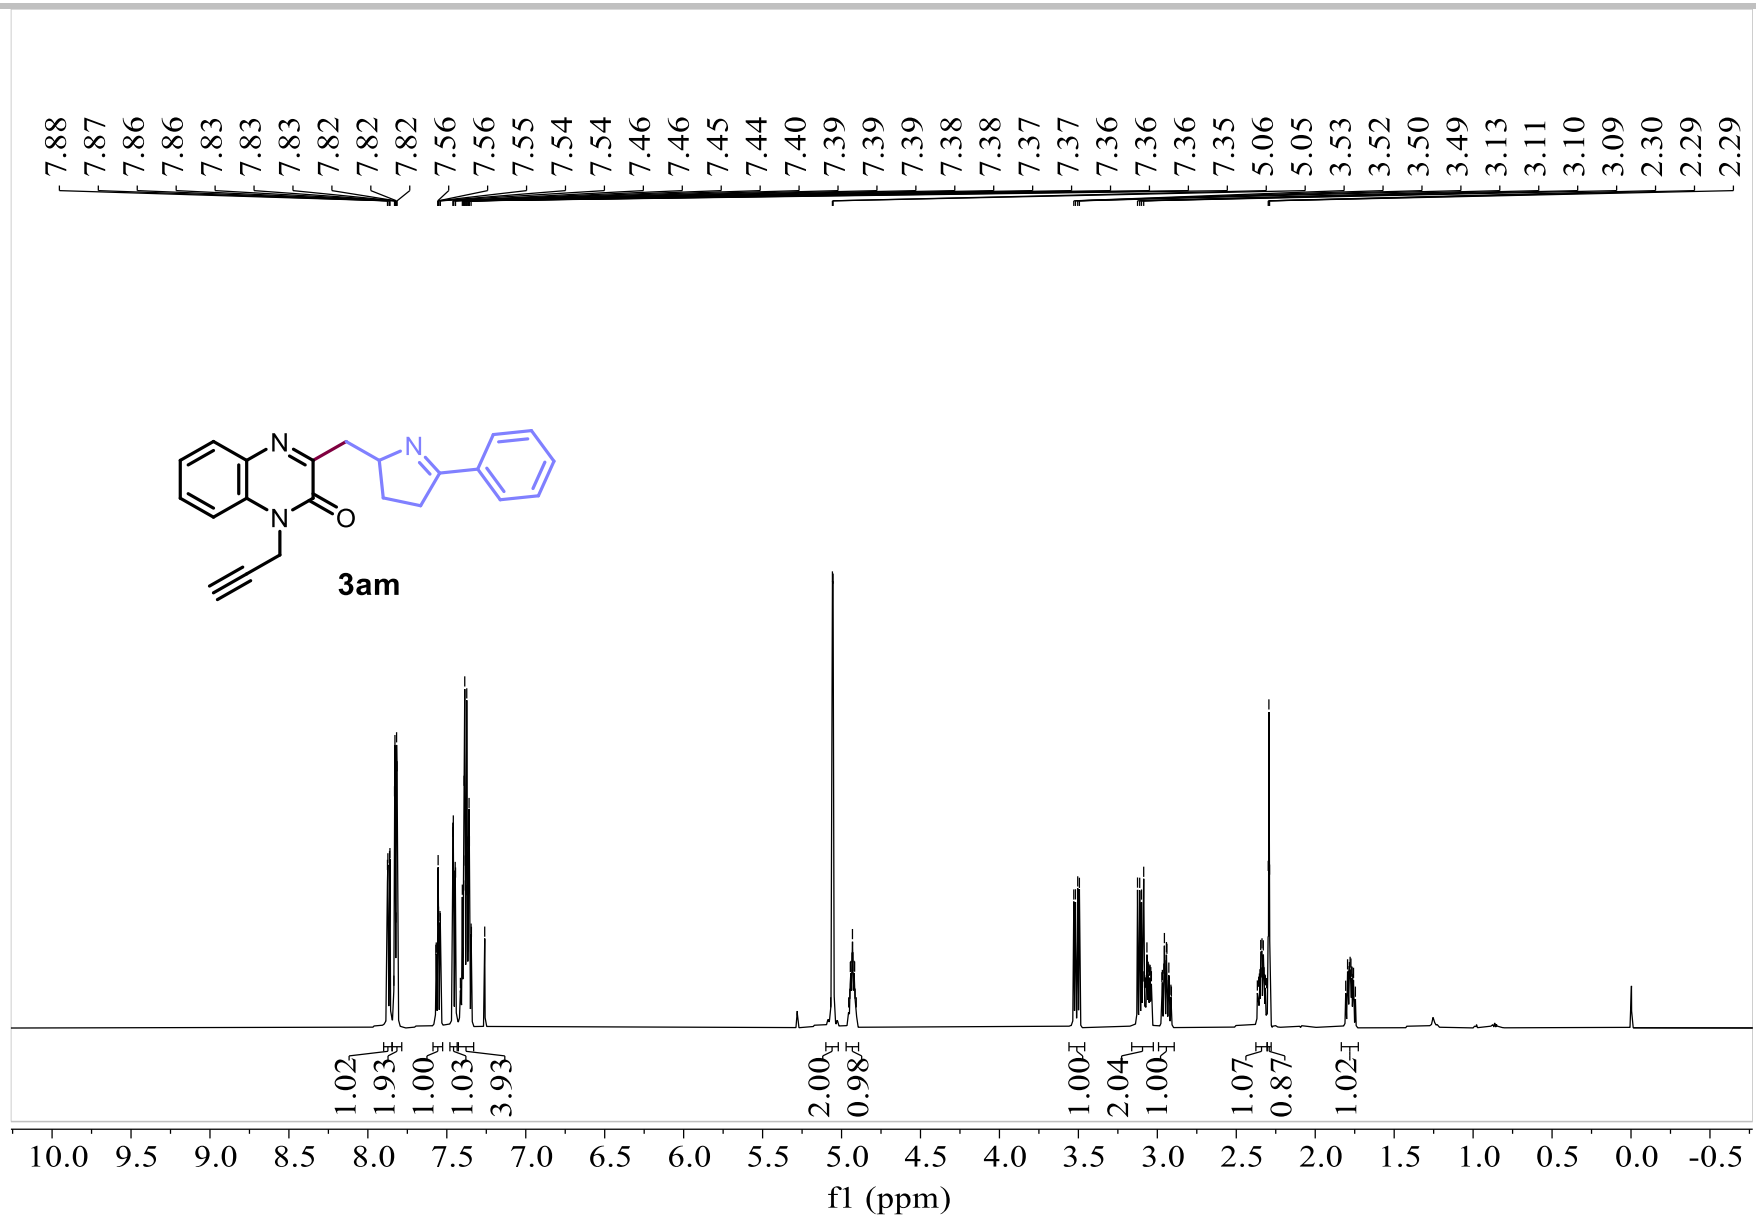

SUPPLEMENTARY INFORMATION

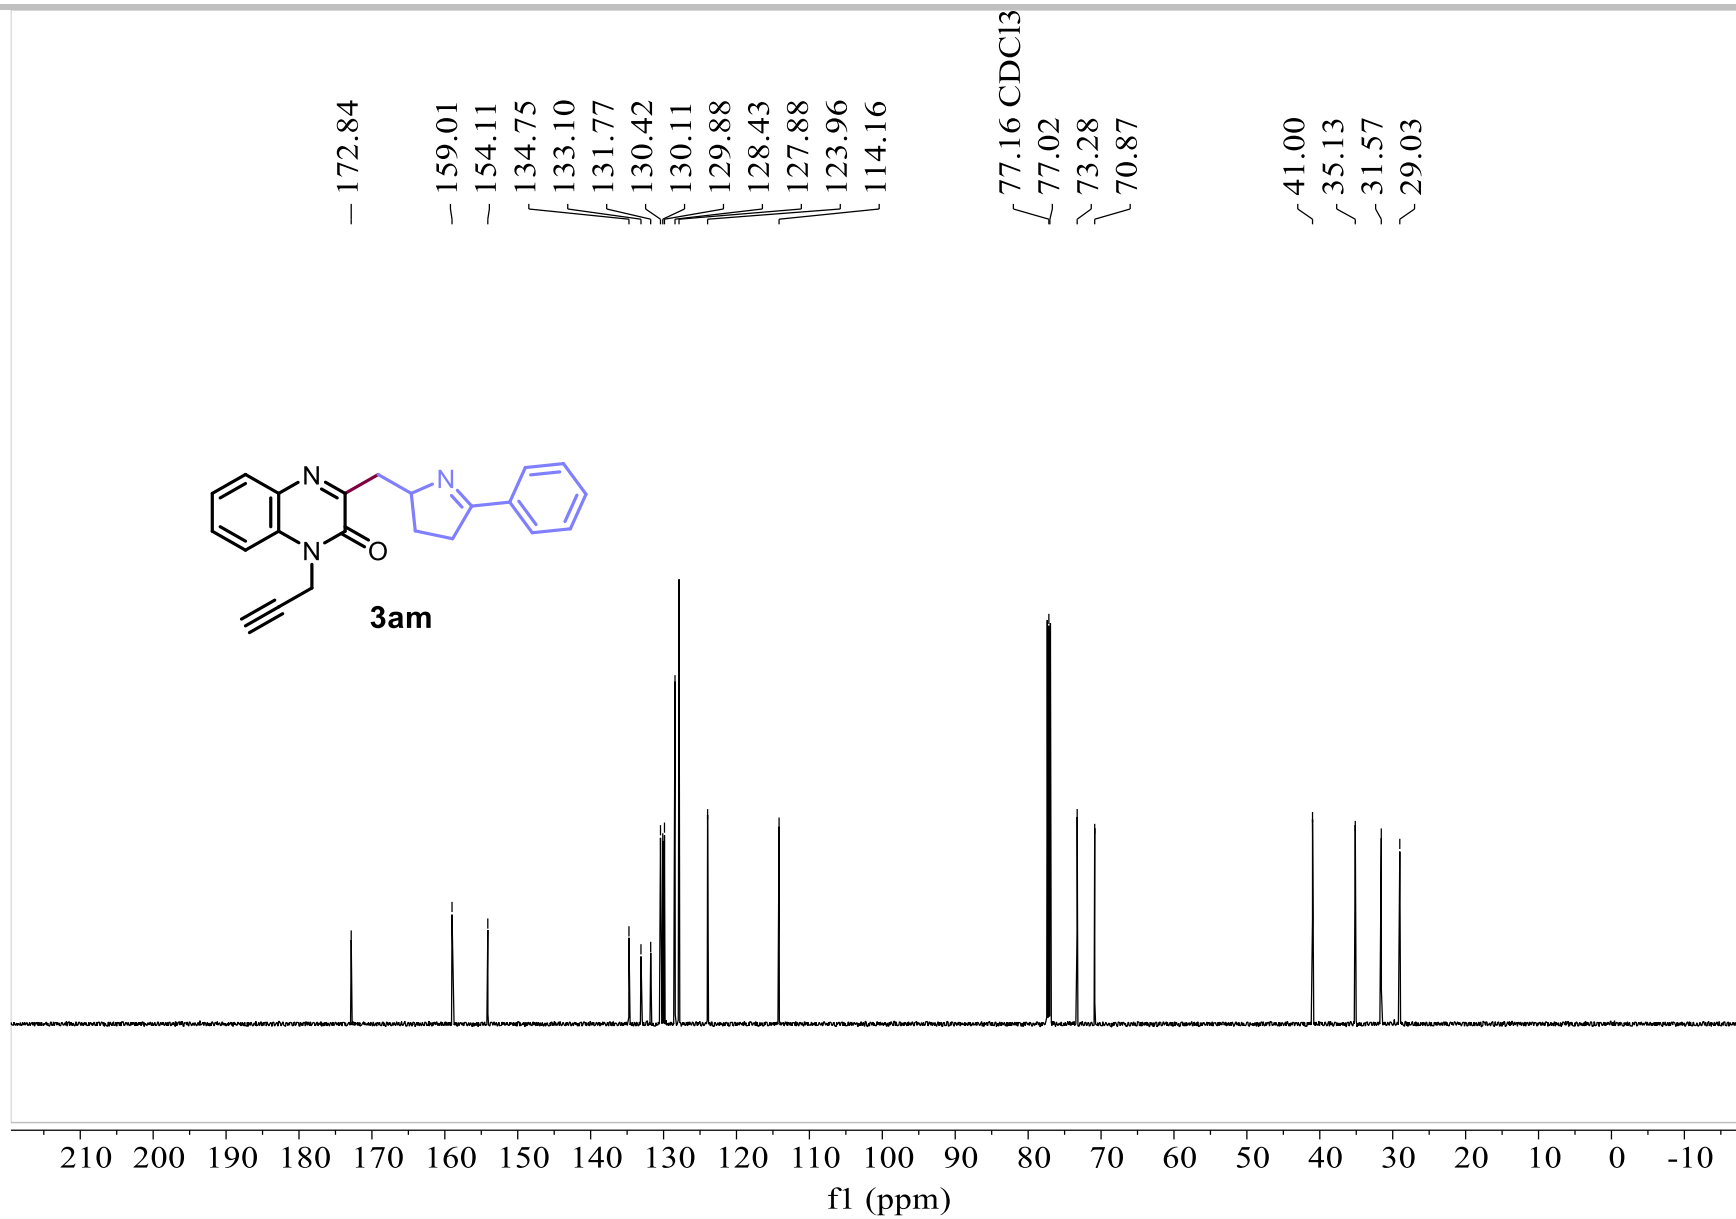

SUPPLEMENTARY INFORMATION

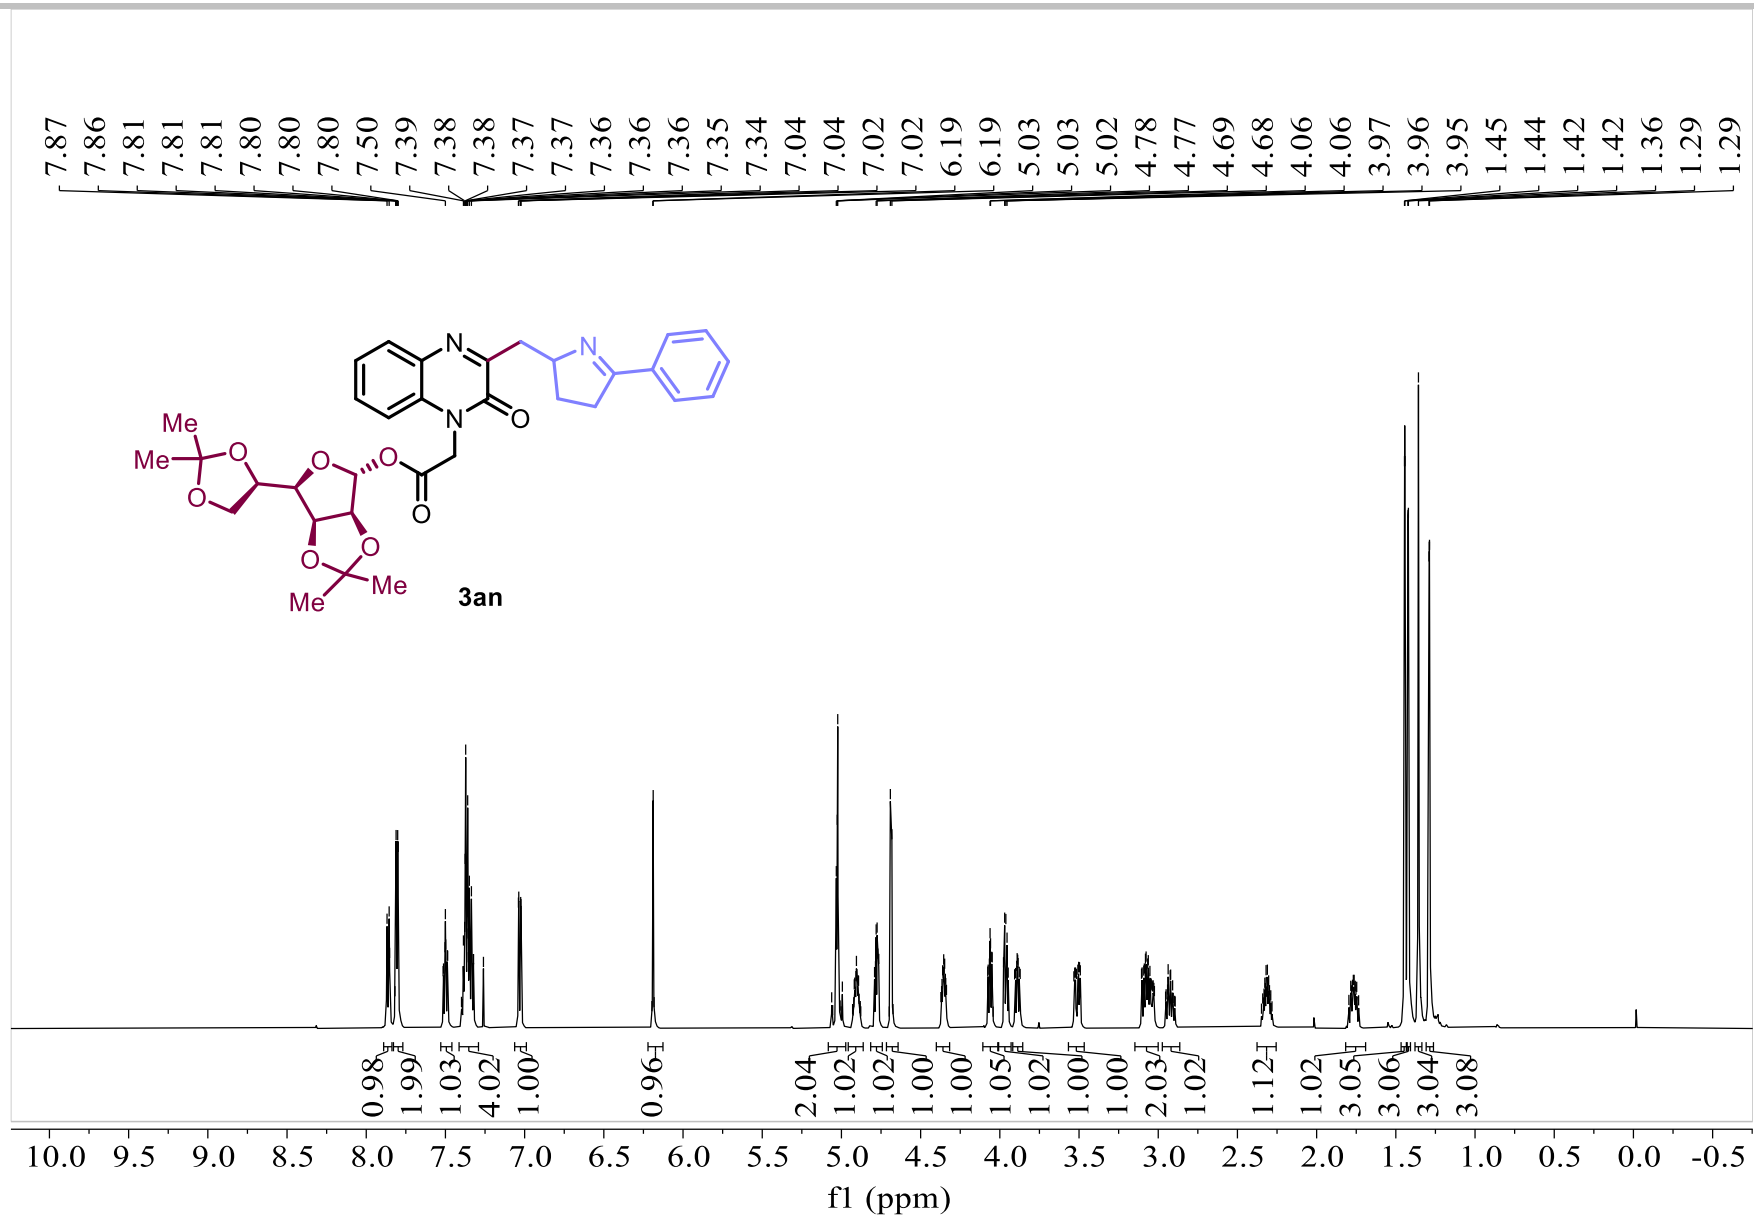



SUPPLEMENTARY INFORMATION

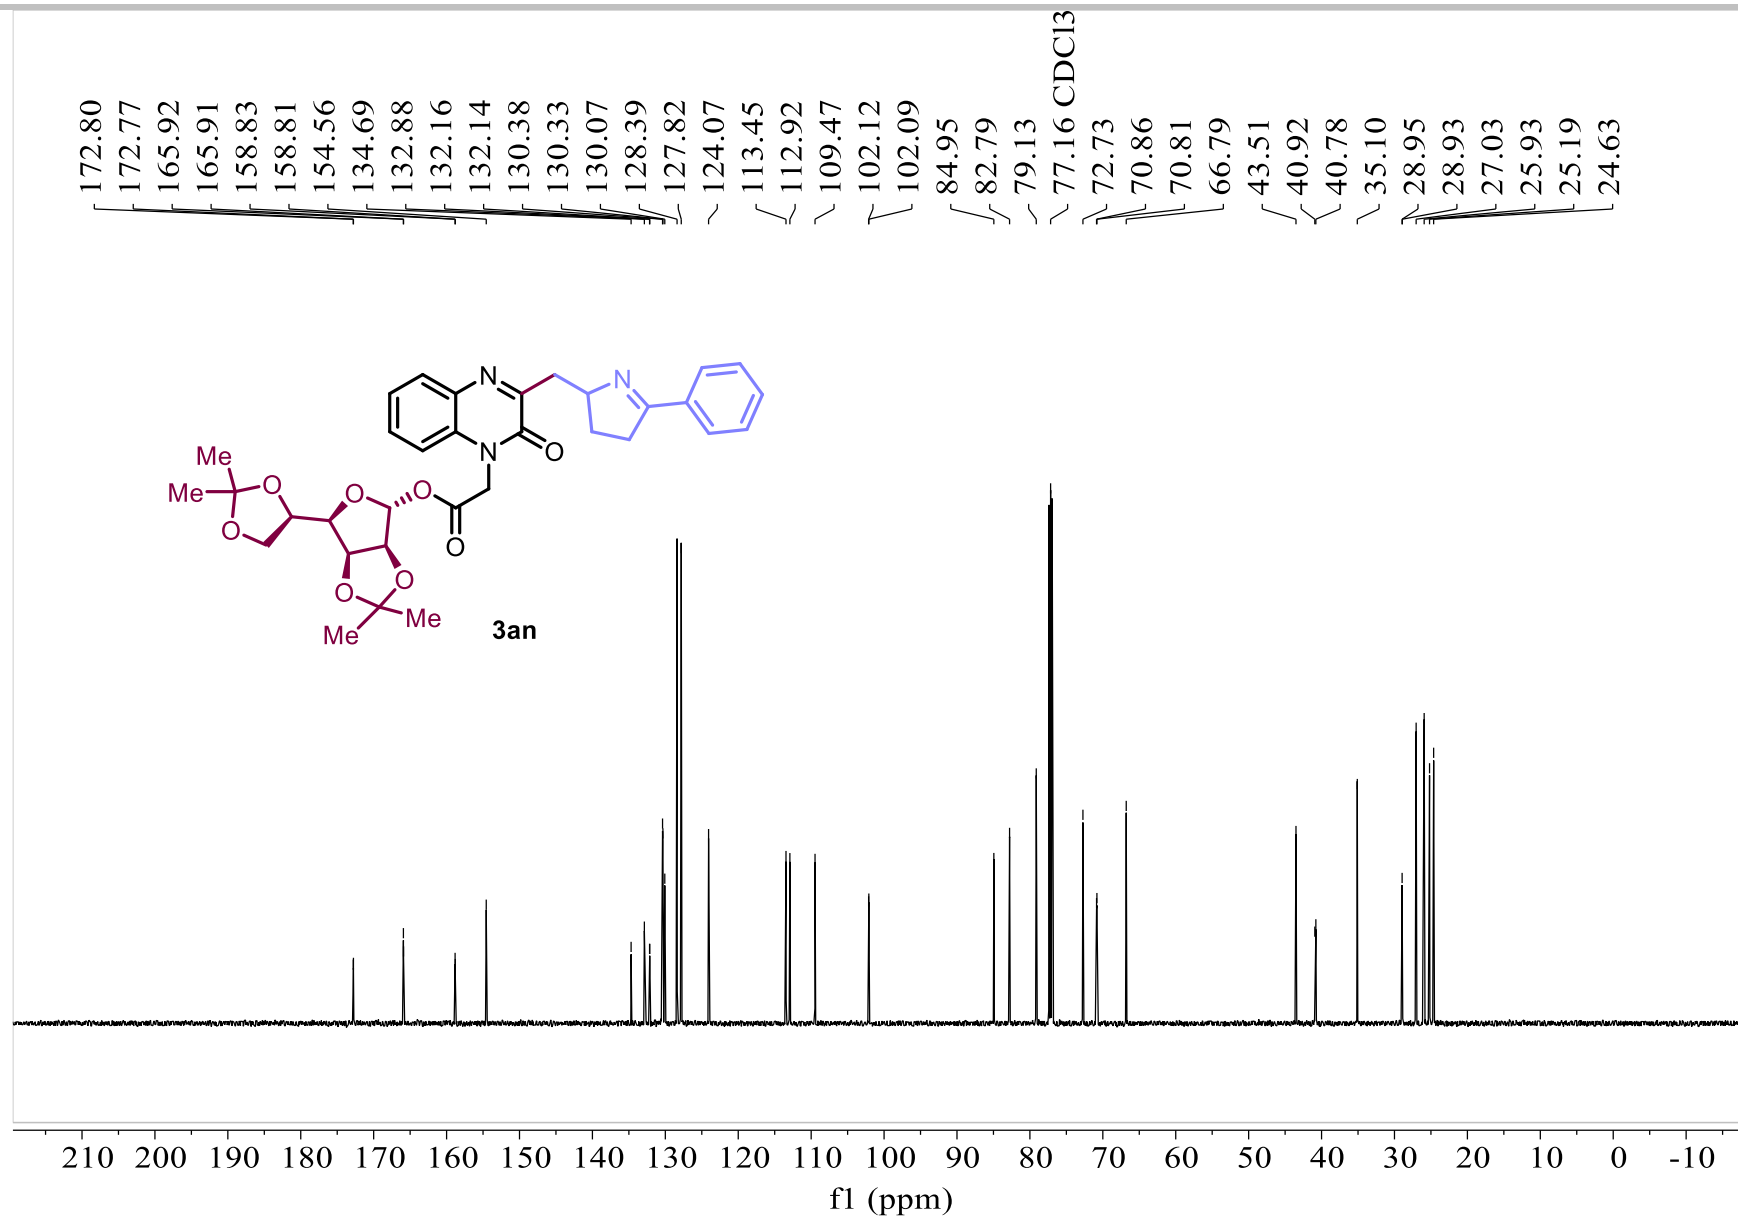

SUPPLEMENTARY INFORMATION

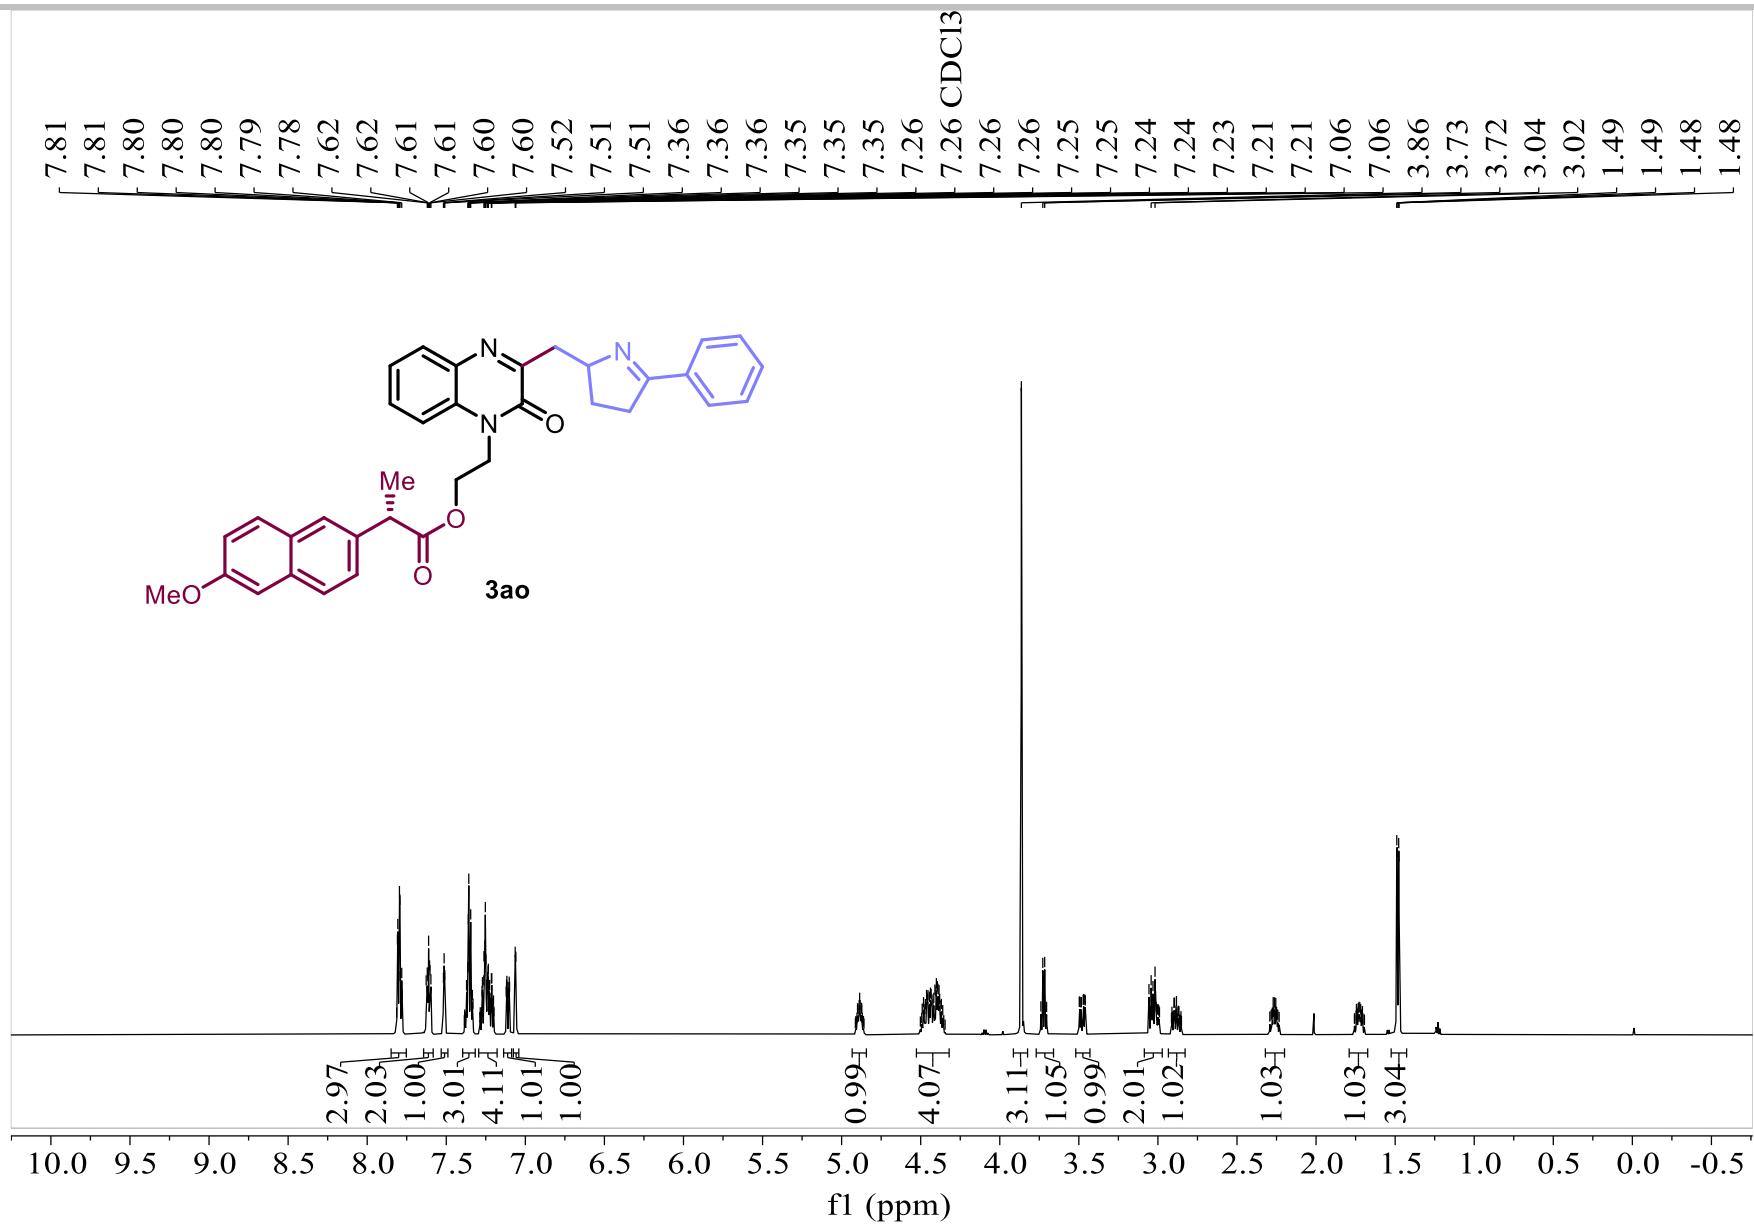

SUPPLEMENTARY INFORMATION

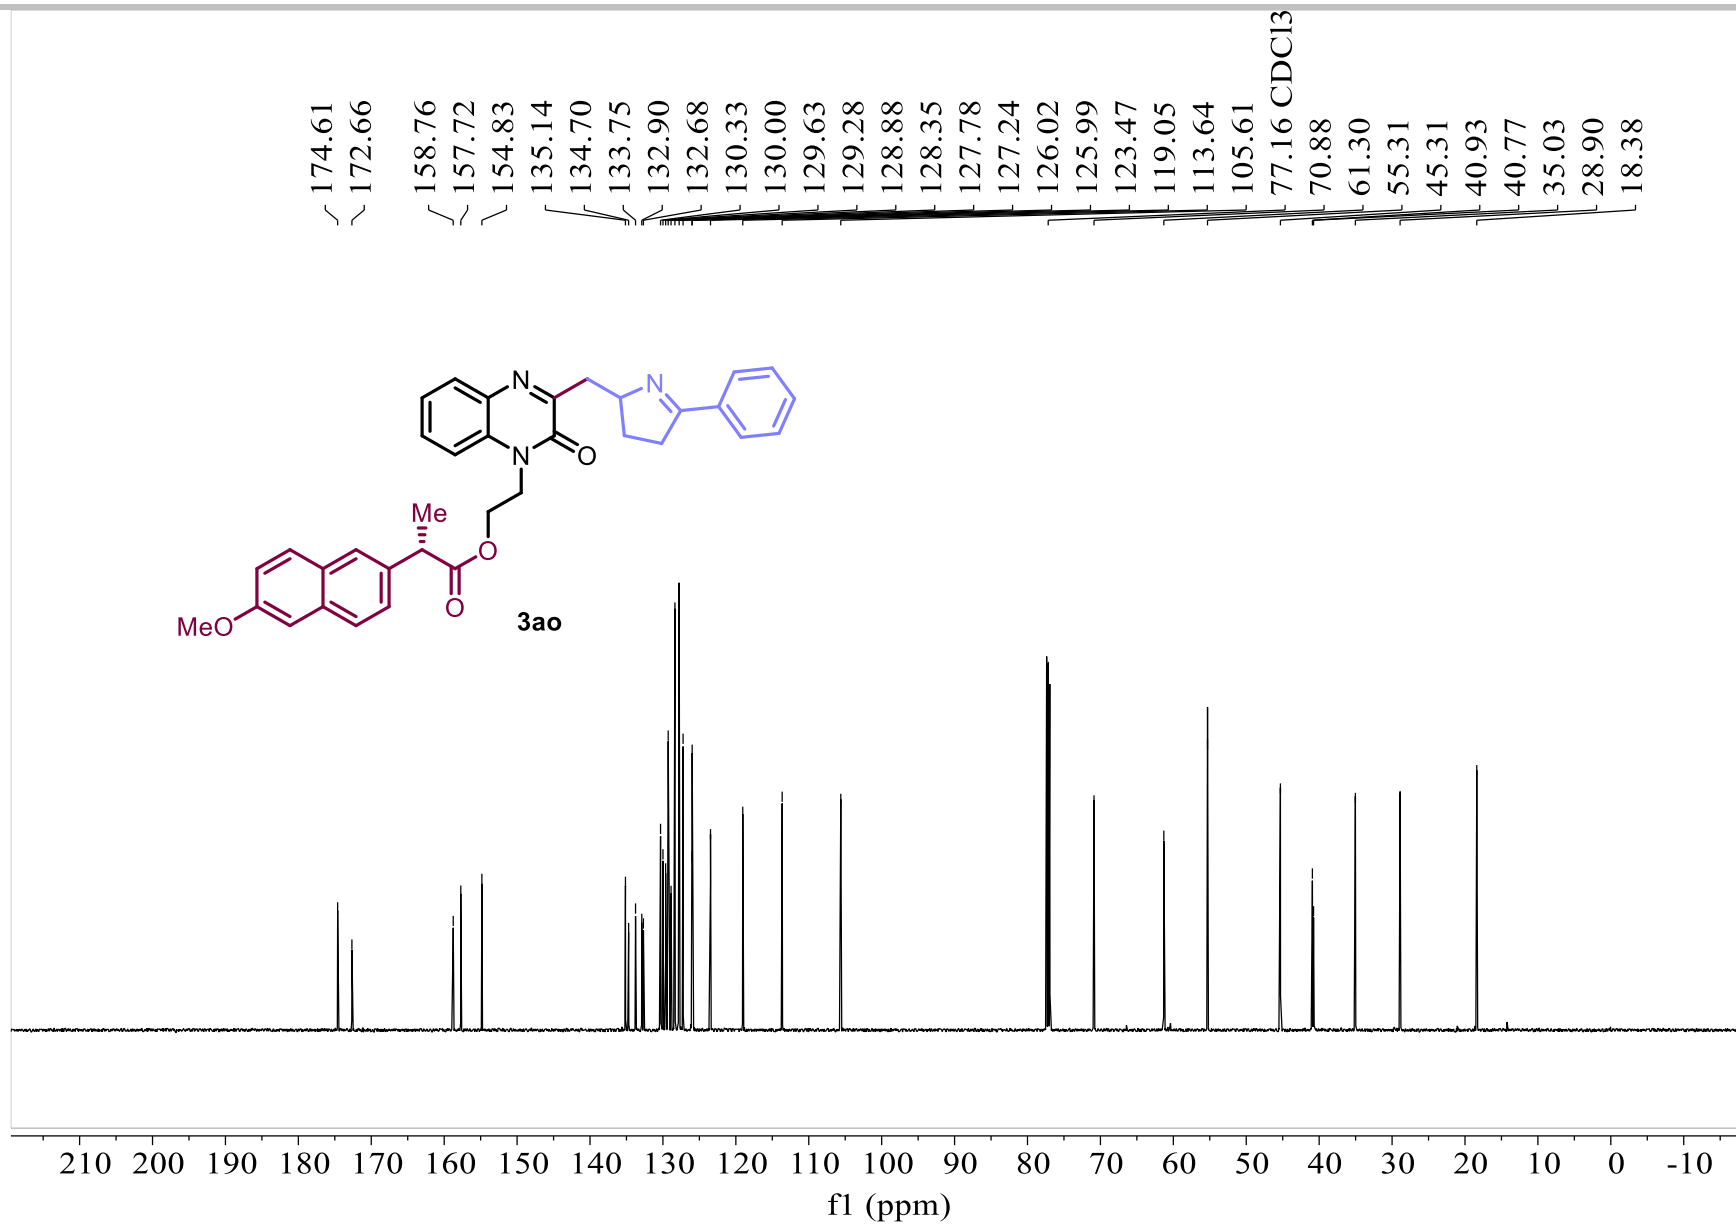

SUPPLEMENTARY INFORMATION

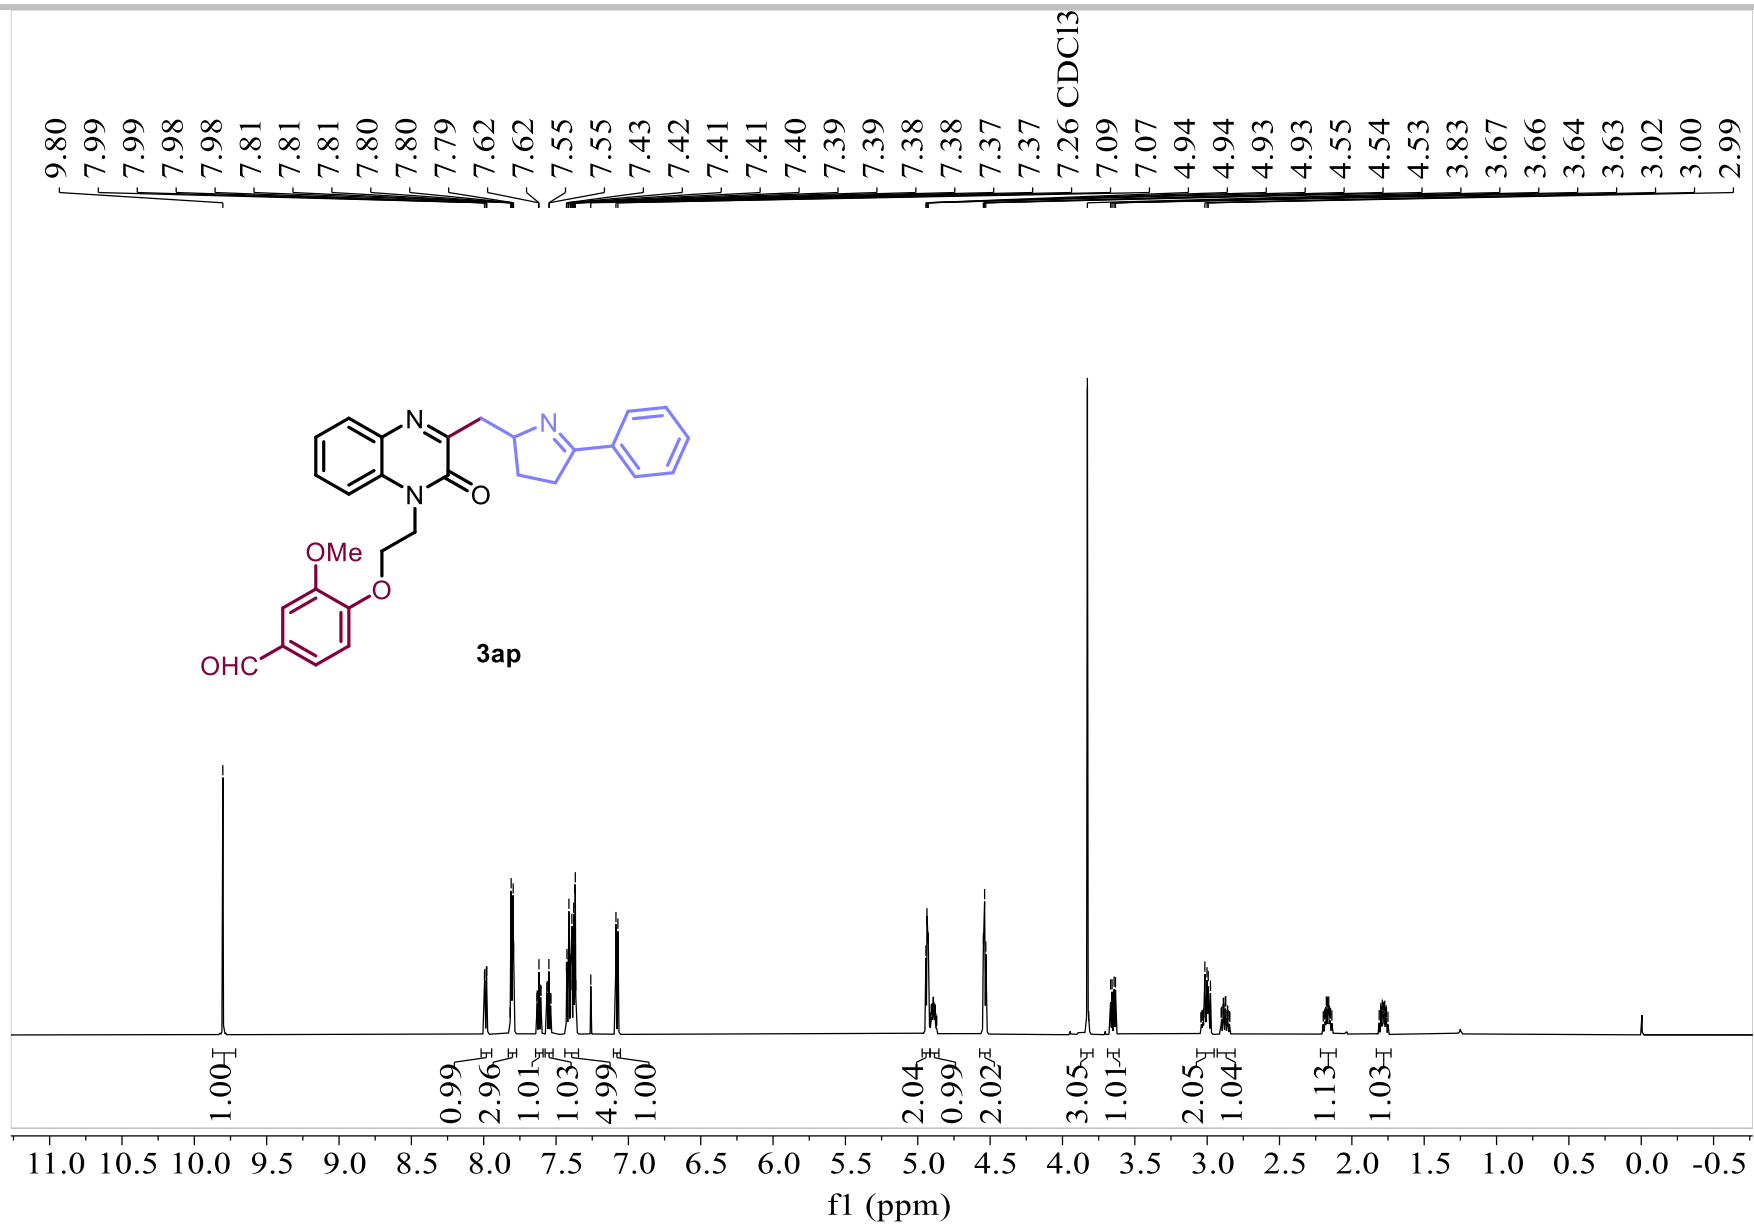

SUPPLEMENTARY INFORMATION

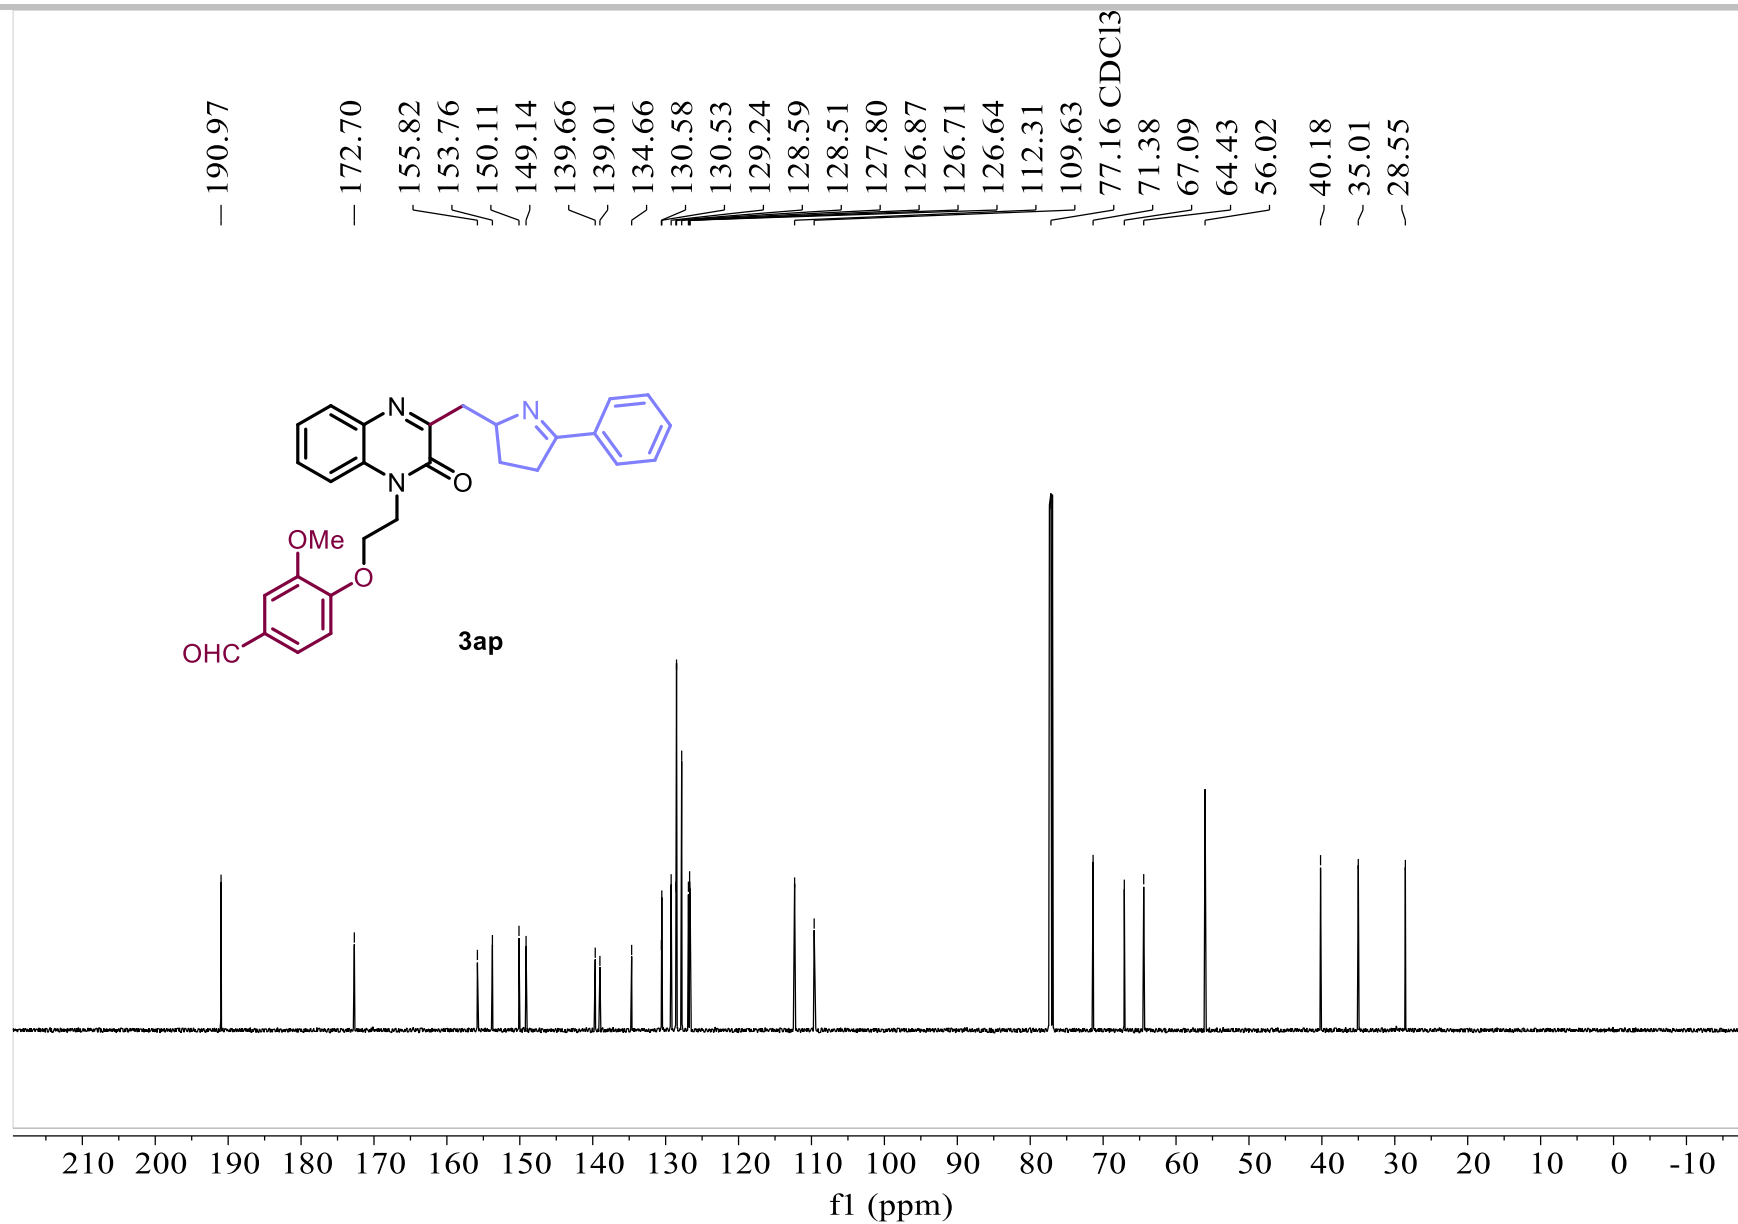

SUPPLEMENTARY INFORMATION

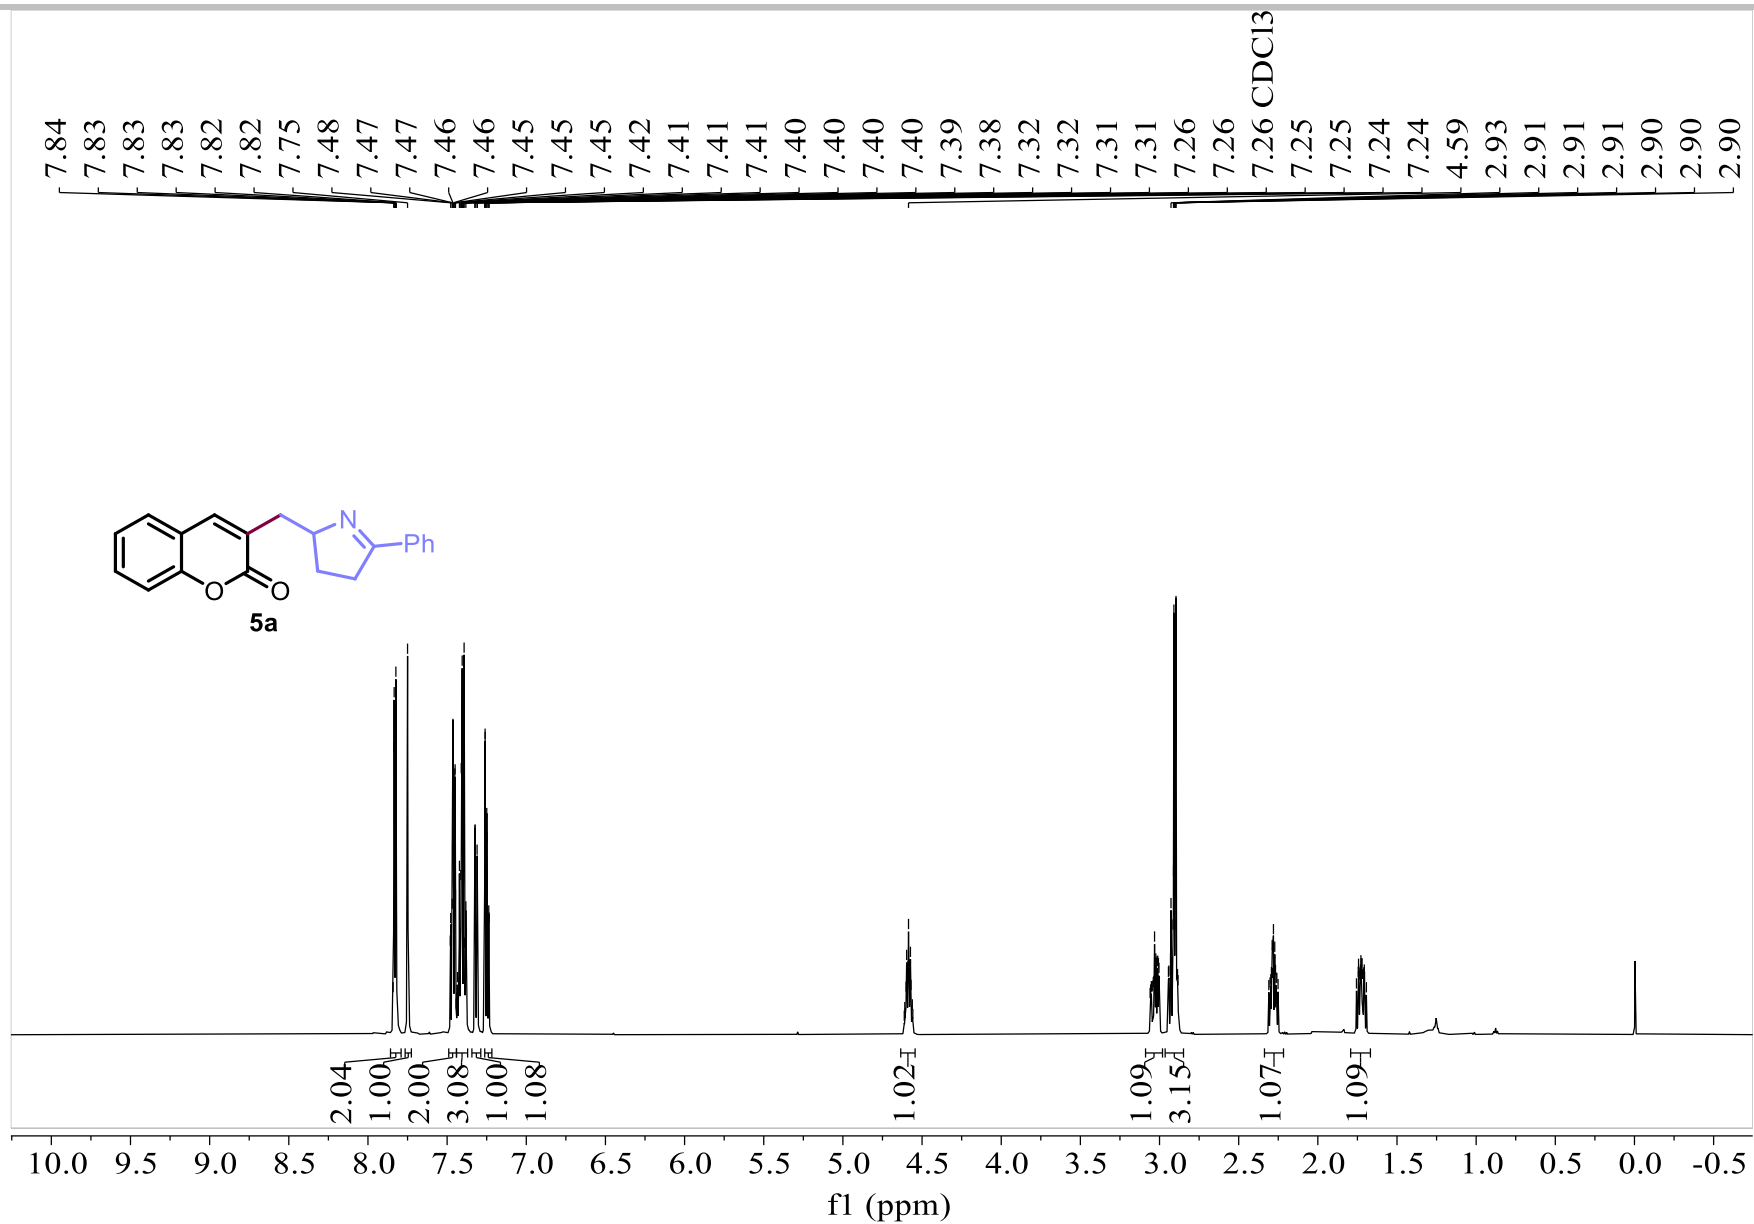

SUPPLEMENTARY INFORMATION

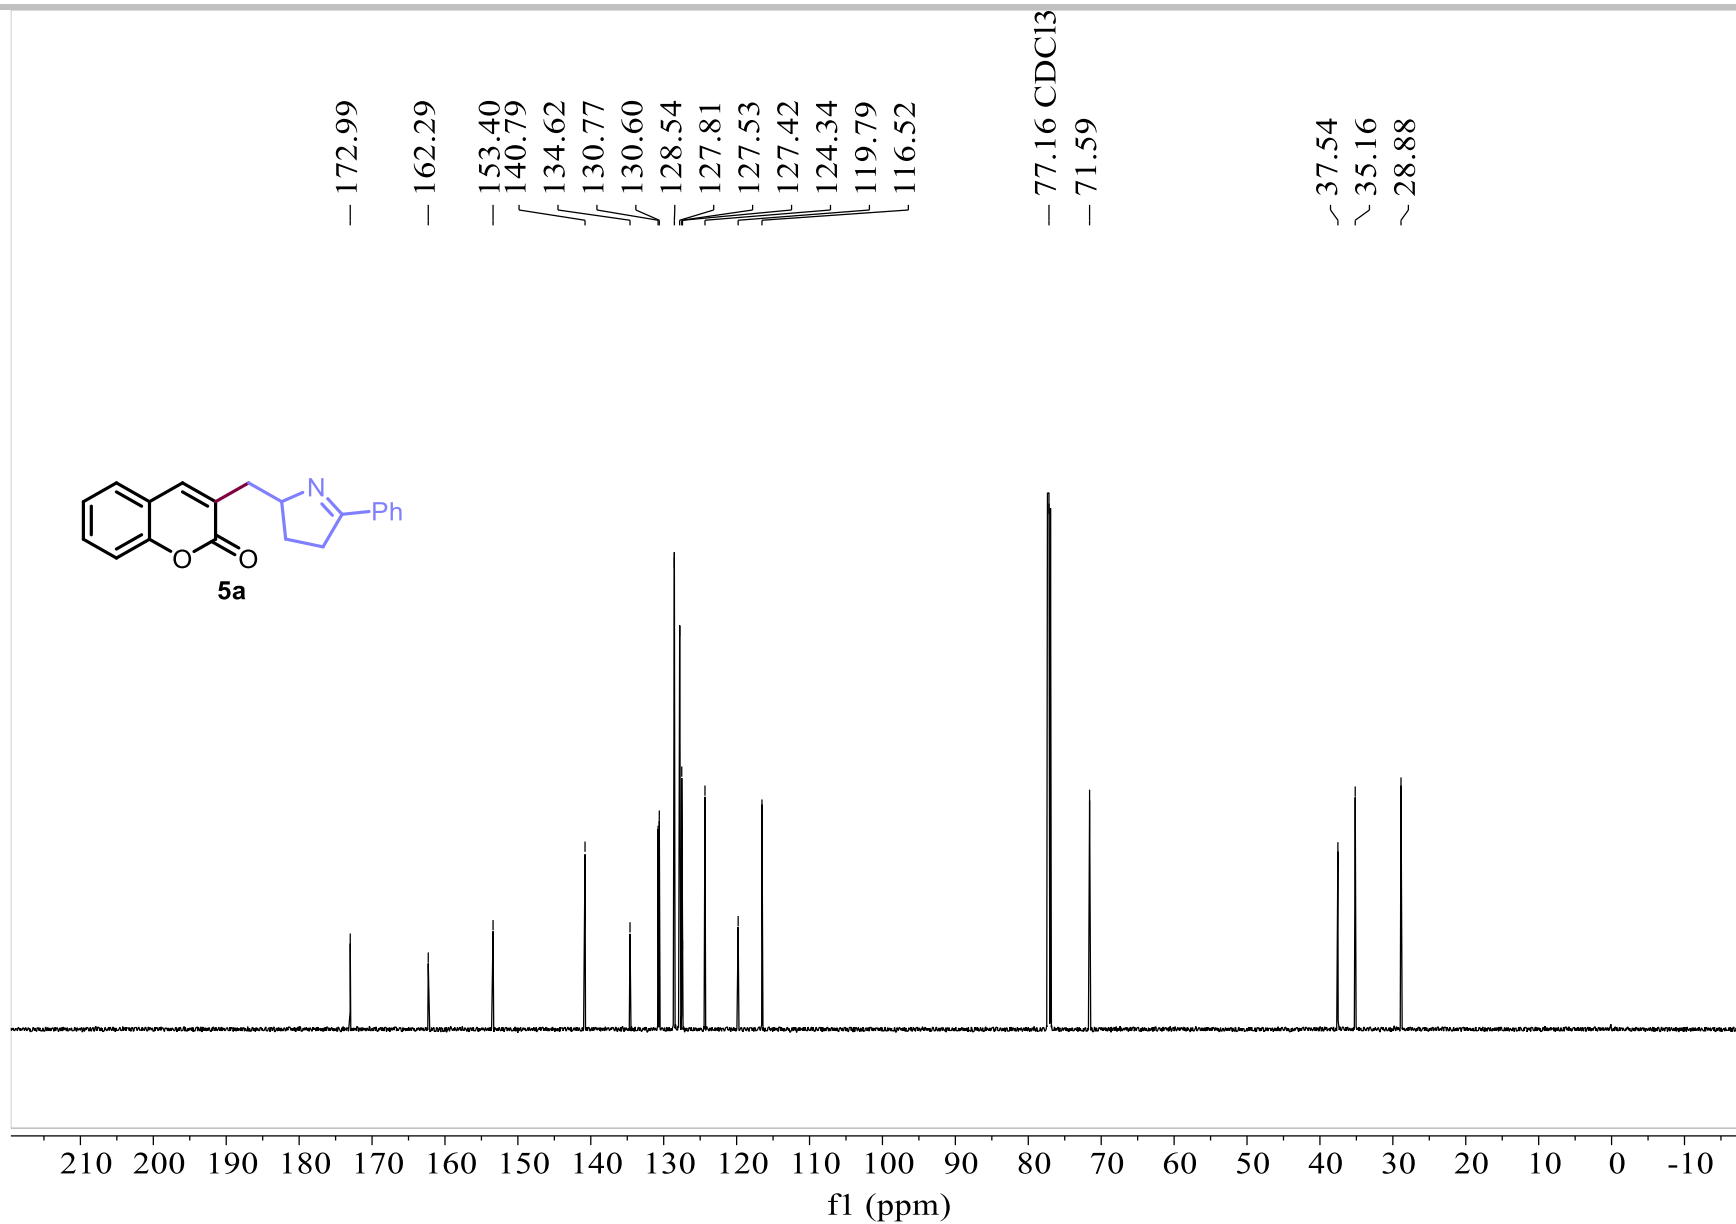

SUPPLEMENTARY INFORMATION

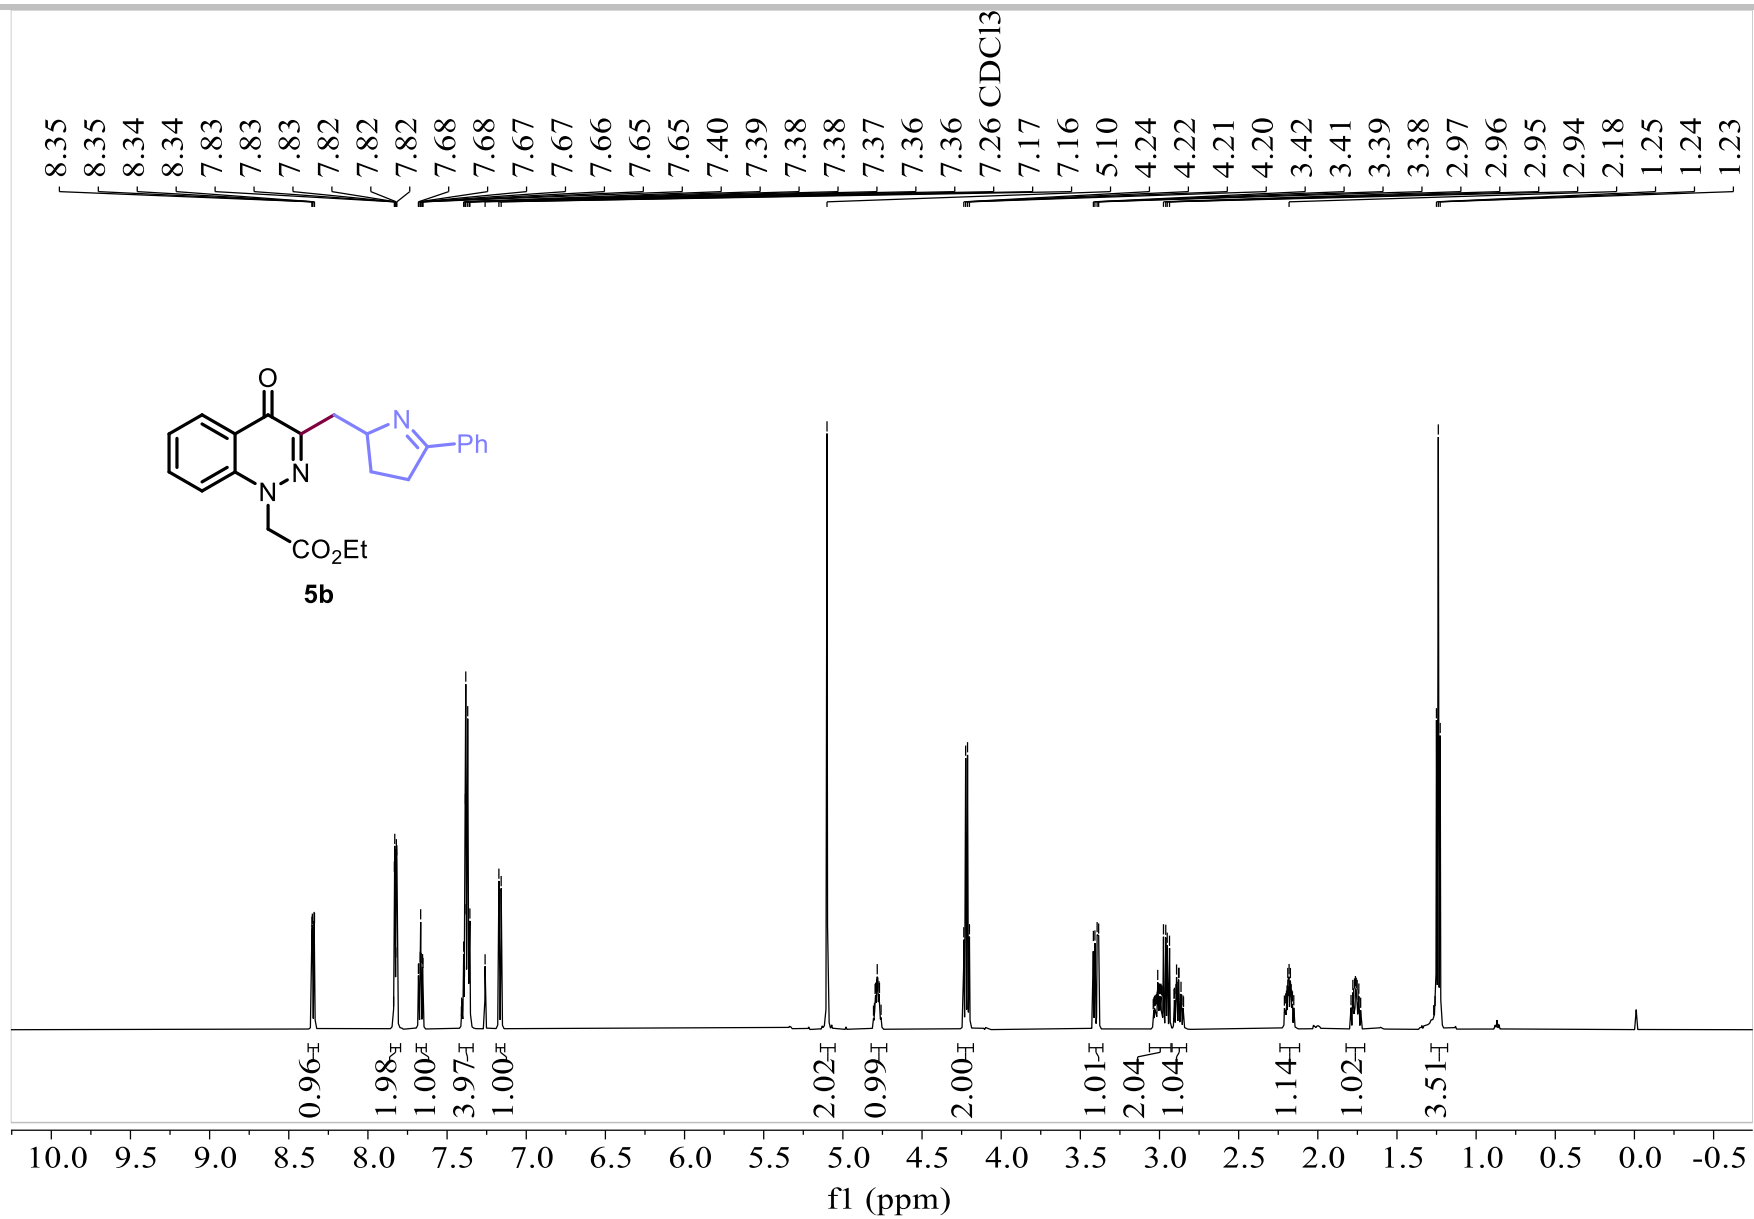



SUPPLEMENTARY INFORMATION

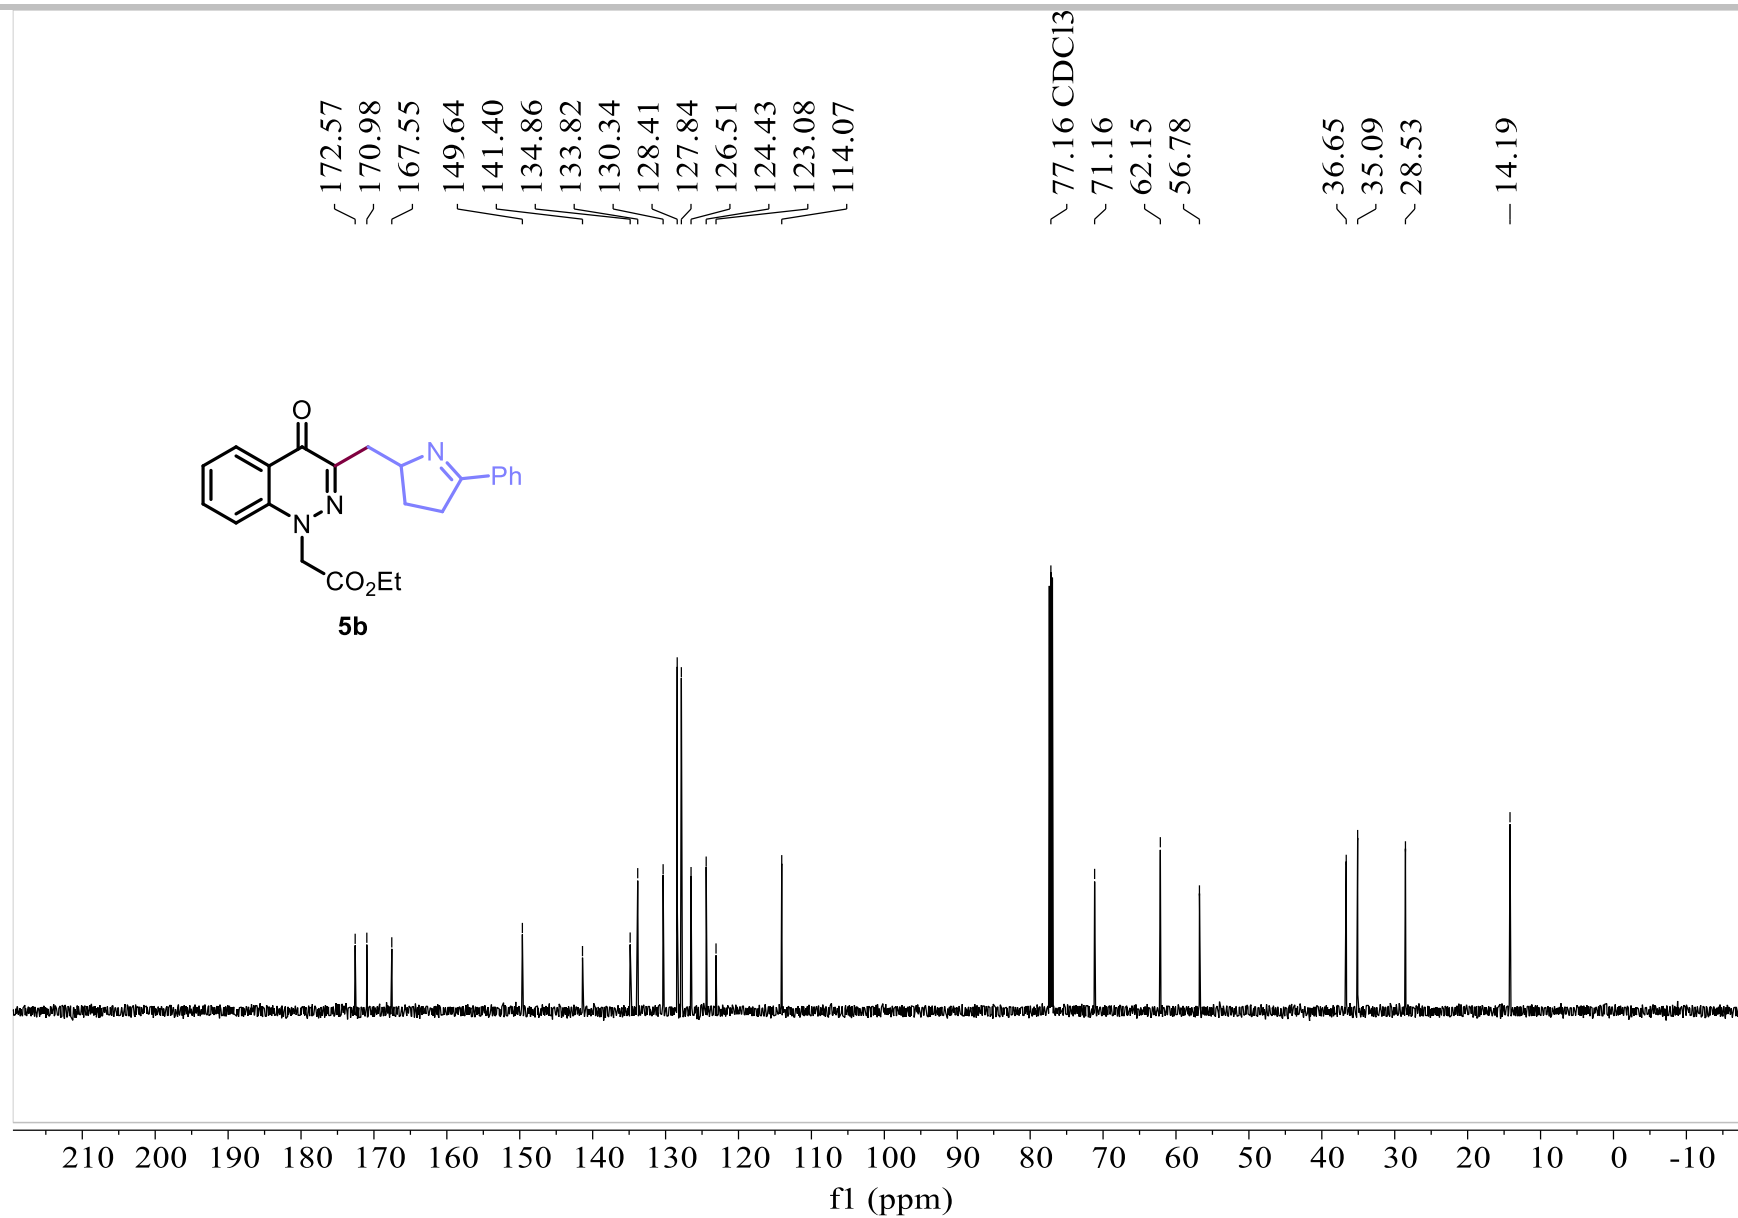

SUPPLEMENTARY INFORMATION

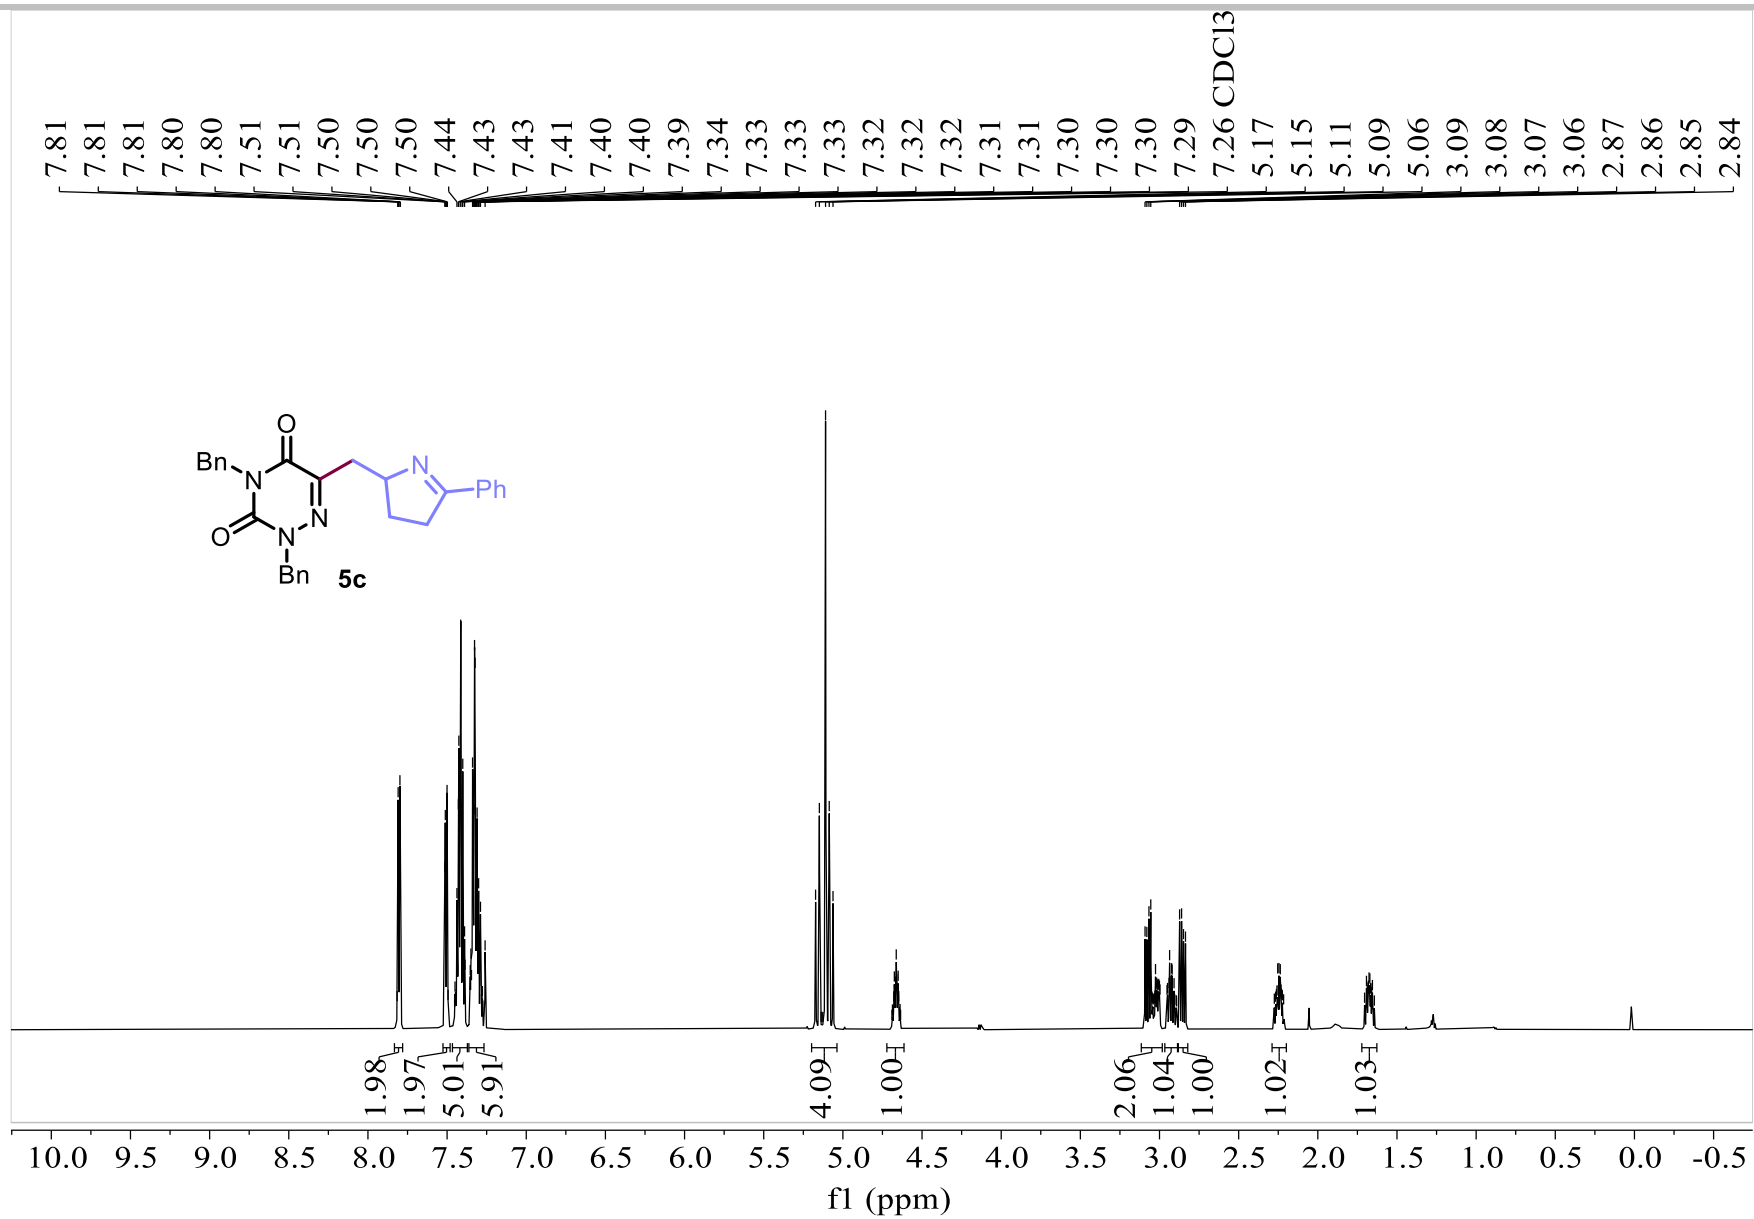

SUPPLEMENTARY INFORMATION

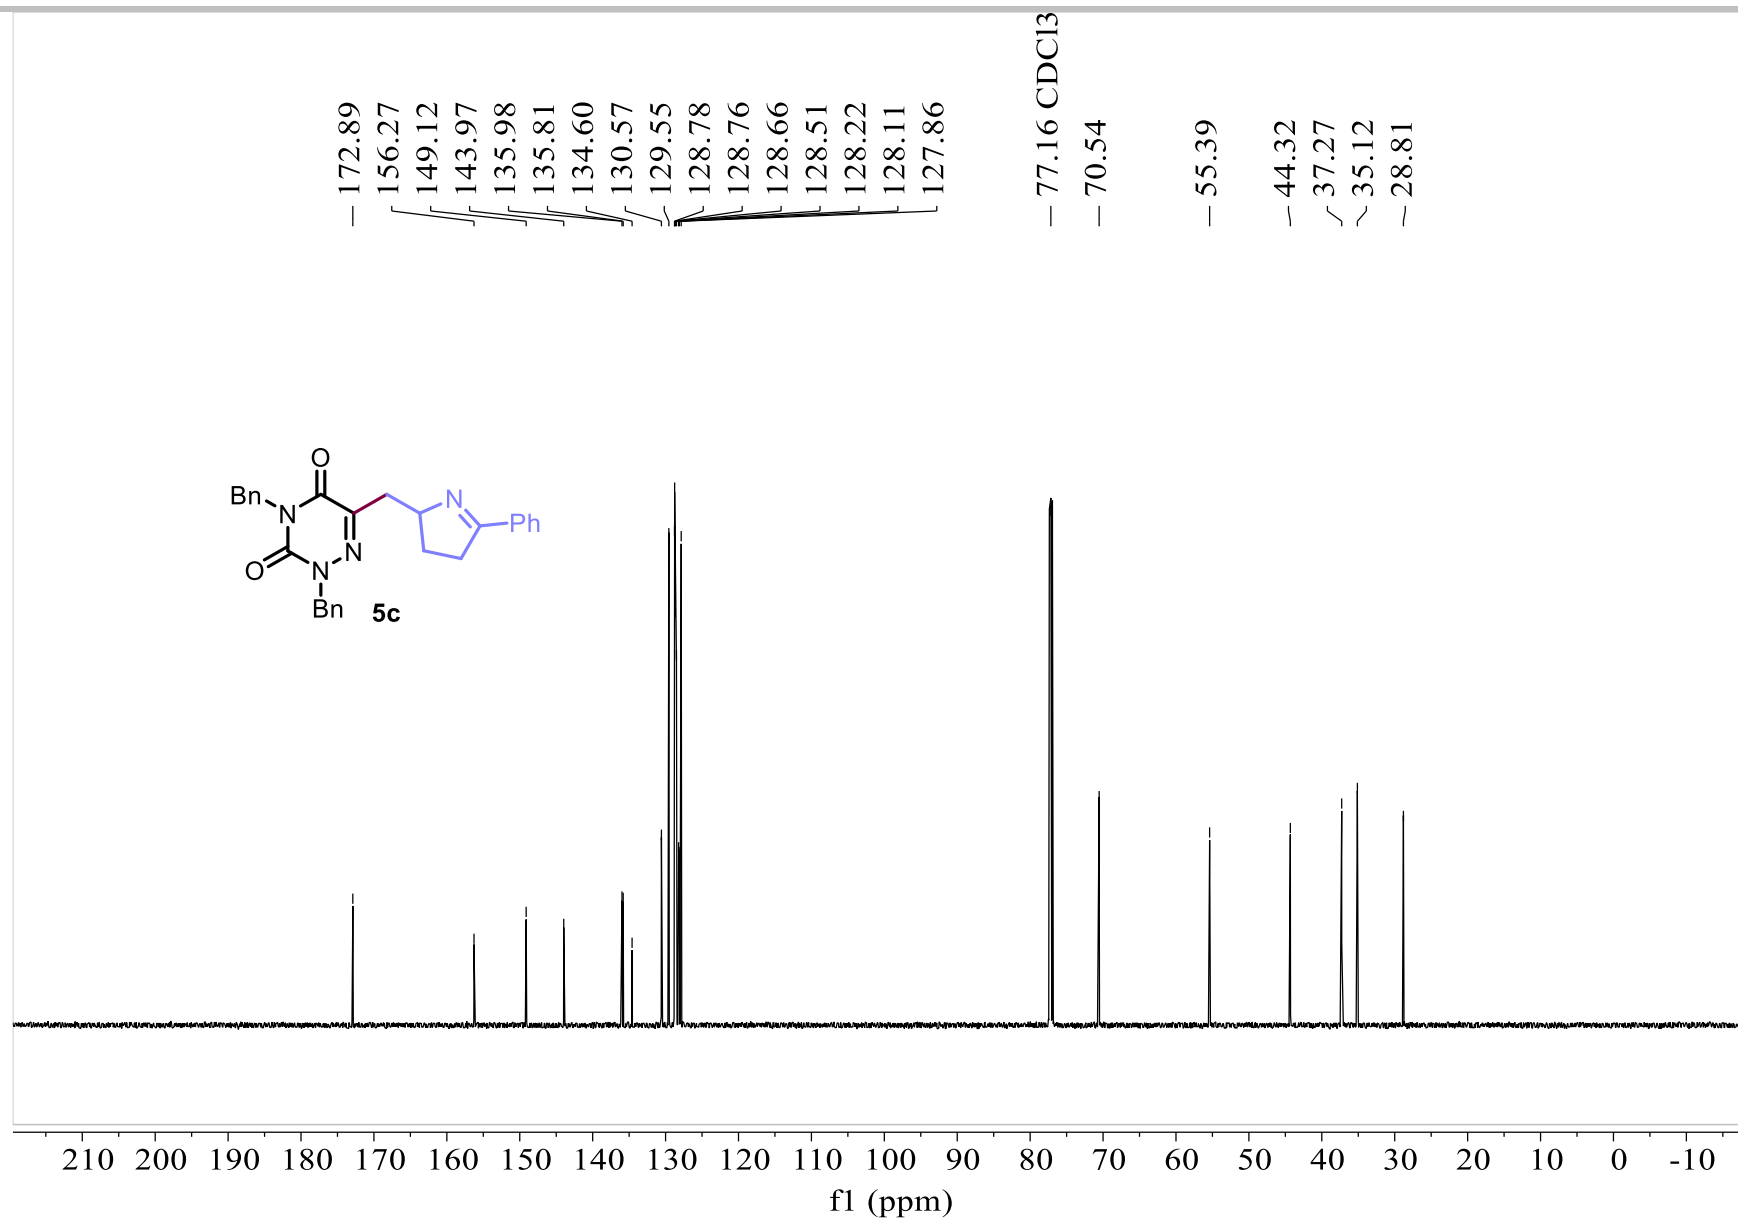

SUPPLEMENTARY INFORMATION

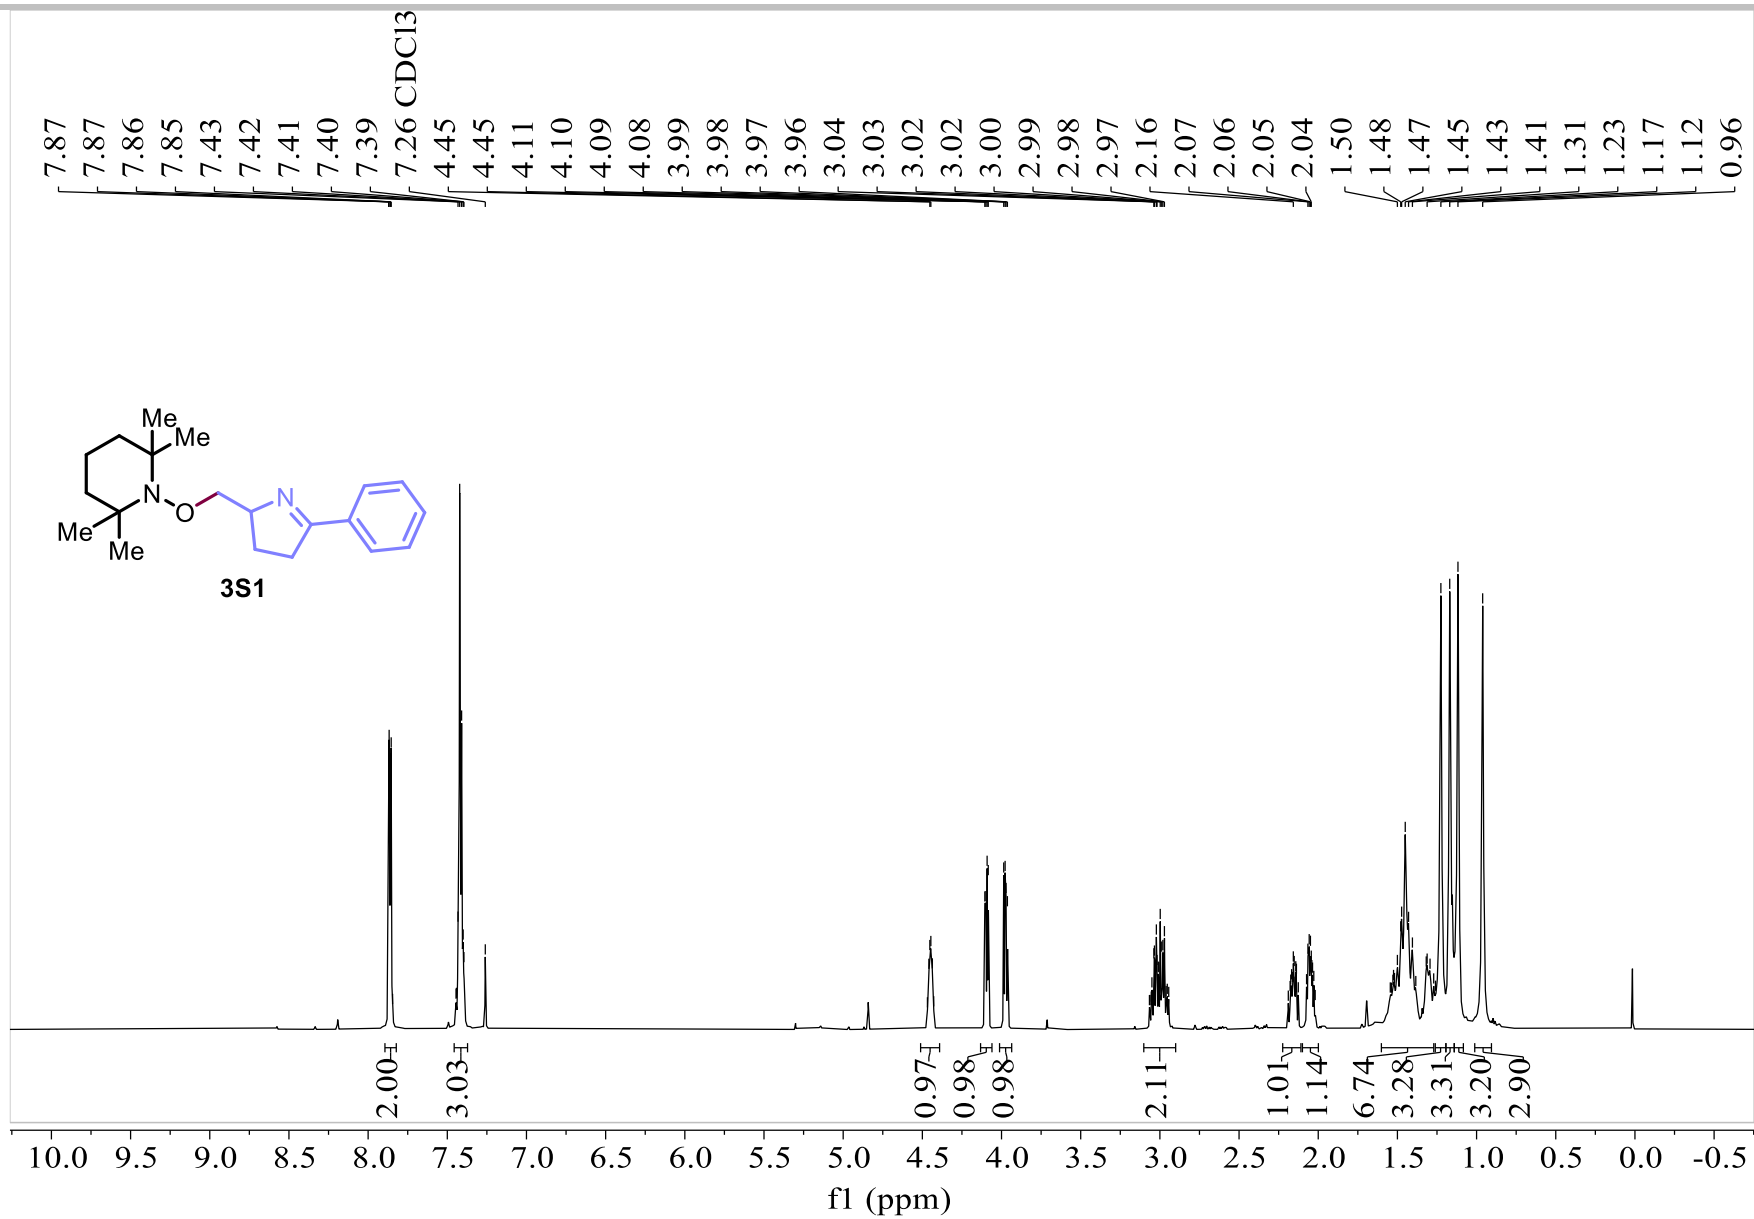



SUPPLEMENTARY INFORMATION

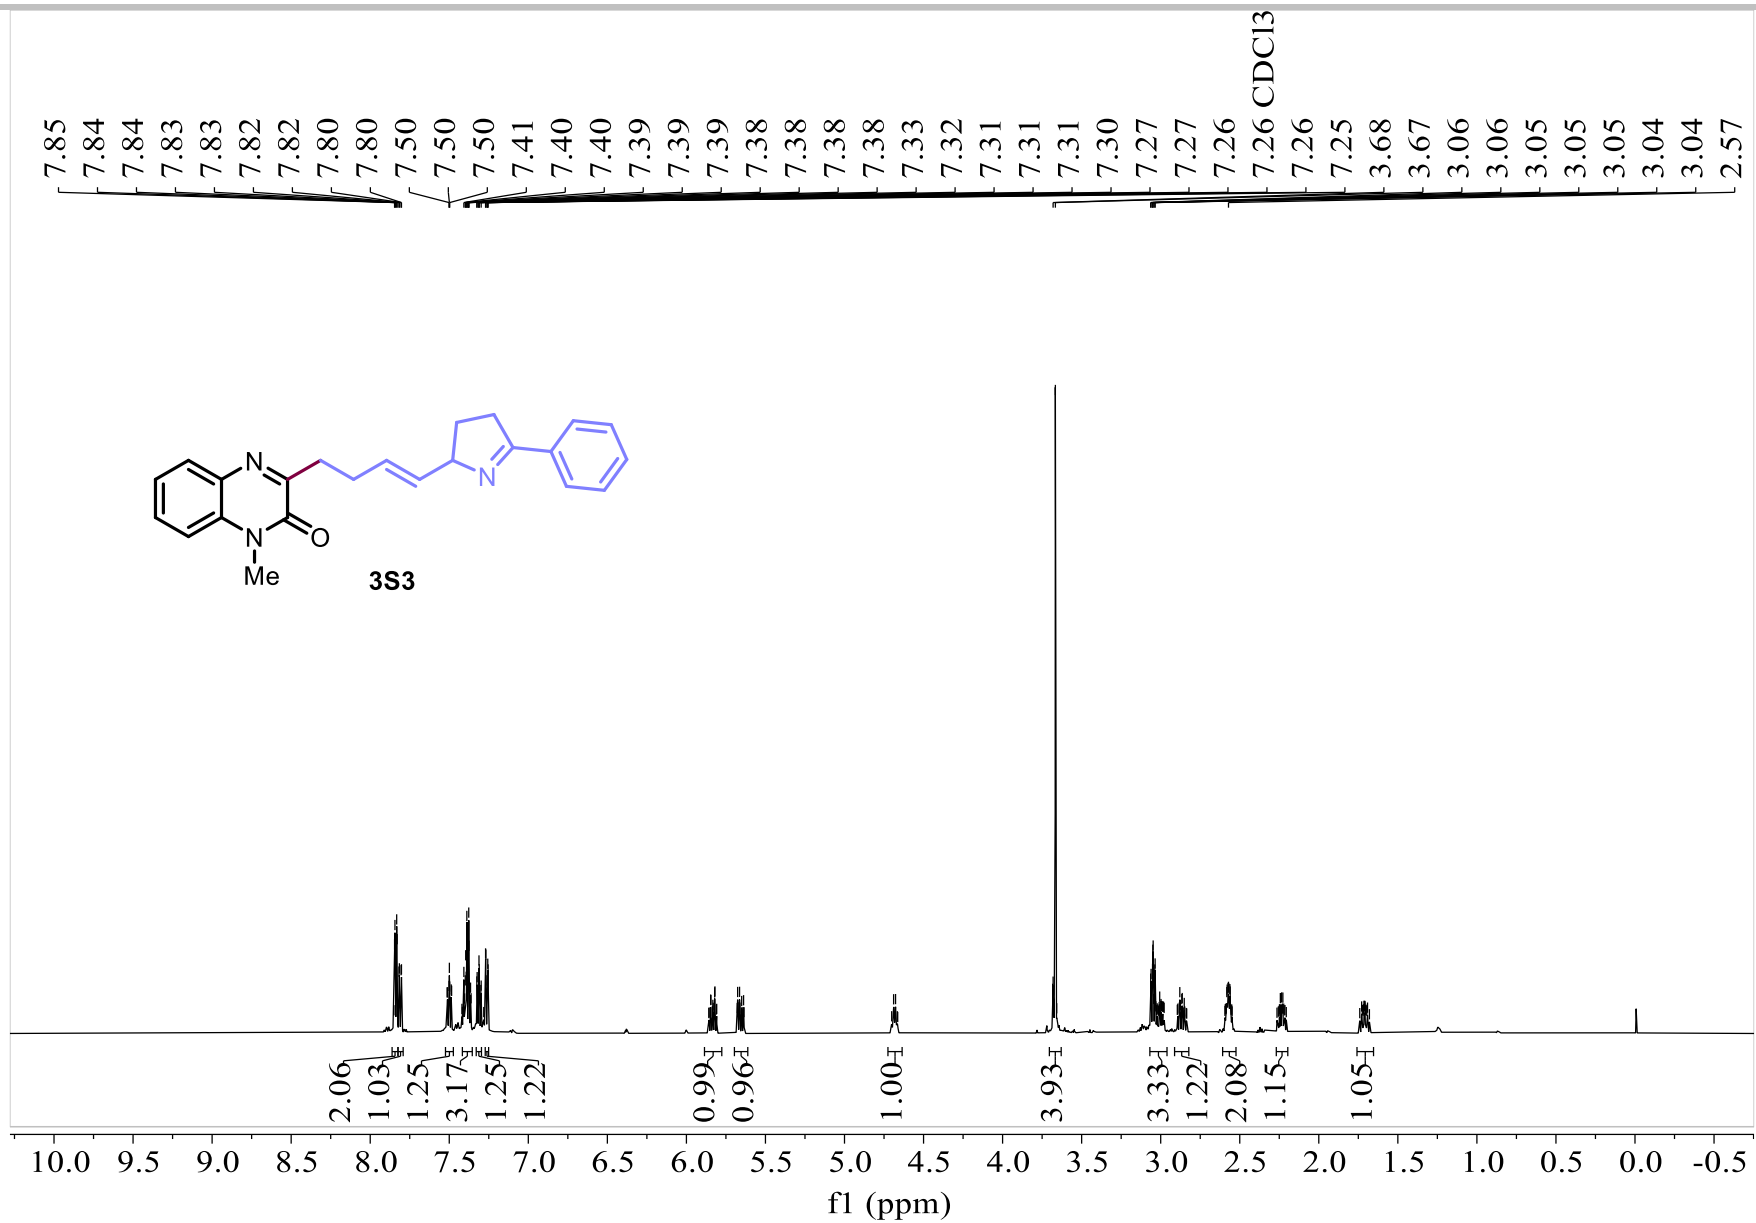

SUPPLEMENTARY INFORMATION

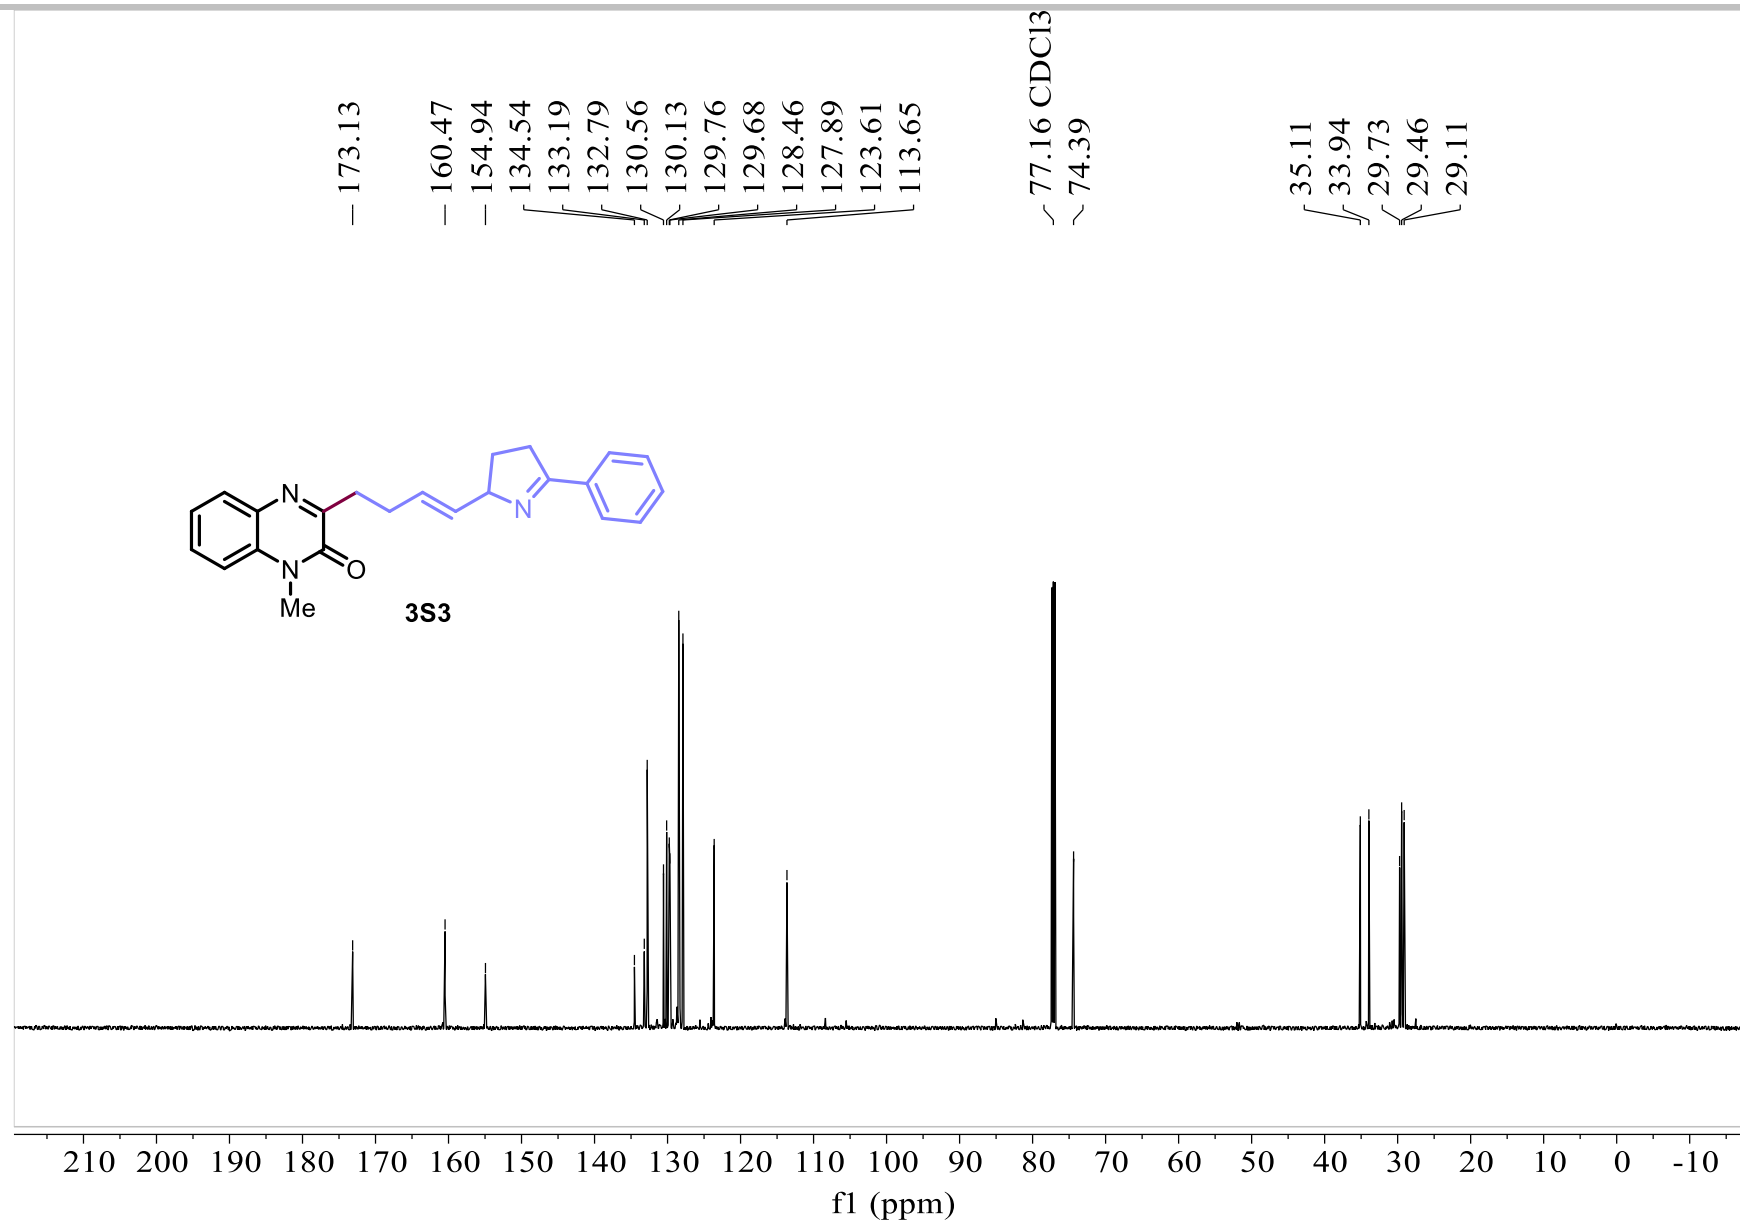

Supplement: d4qo01390e1.pdf [file d4qo01390e1.pdf]
